# Supplementary material for: The fate of visual long term memories for images across weeks in adults and children
Source: Sci Rep. 2022 Dec 16;12:21763. doi: 10.1038/s41598-022-26002-7 (PMC9758234; doi:10.1038/s41598-022-26002-7)
Supplement: Supplementary file 1 — Supplementary Information 1. [file 41598_2022_26002_MOESM1_ESM.xlsx]

## Sheet: adults
participants	delay	caracteristique	categorie_base	categorie_sub	condition	Type	repetition	response	response_response_image	response_response_masque	response_time	response_time_response_image	response_time_response_masque	stim	time_presentation	condition	Hit.FA	Rejet/miss	confiance	rien	confHitFA	rien	Conf rejetmiss	ROC Index	condition		Data used for analyses
P01	0 immédiat	animal5	papillon	animal	Old	meaningfull	1	r	l	r	148	483	148	gist005_1	120	Old	1	0	4	r	1			1	MF_old_120_1
P01	0 immédiat	animal17	dauphin	animal	Old	meaningfull	1	r	l	r	147	500	147	gist017_2	120	Old	1	0	4	r	1			1	MF_old_120_1		Condition = Z		Confidance = I
P01	0 immédiat	animal26	ours	animal	Old	meaningfull	1	r	s	r	220	562	220	gist026_2	120	Old	0	1	4			r	8	8	MF_old_120_1				a = just guessing
P01	0 immédiat	animal35	tigre	animal	Old	meaningfull	1	r	l	r	204	417	204	gist035_2	120	Old	1	0	4	r	1			1	MF_old_120_1		MF_old_120_1 = meaningful _old _120ms _1 presentation		z = not sure
P01	0 immédiat	animal42	giraffe	animal	Old	meaningfull	1	r	l	r	268	347	268	gist042_3	120	Old	1	0	4	r	1			1	MF_old_120_1		MF_old_120_2 = meaningful _old _120ms _2 presentations		e = confident
P01	0 immédiat	animal52	bouc	animal	Old	meaningfull	1	r	l	r	76	348	76	gist052_2	120	Old	1	0	4	r	1			1	MF_old_120_1		MF_old_1920_1 = meaningful _old _1920ms _1 presentation		r = very sure
P01	0 immédiat	animal60	panthÃ¨re noire	animal	Old	meaningfull	1	r	l	r	316	495	316	gist060_2	120	Old	1	0	4	r	1			1	MF_old_120_1		MF_old_1920_2 = meaningful _old _1920ms _2 presentations
P01	0 immédiat	animal79	cigogne	animal	Old	meaningfull	1	r	s	r	148	396	148	gist079_1	120	Old	0	1	4			r	8	8	MF_old_120_1				reponse image = J
P01	0 immédiat	paysage7	foret	paysage	Old	meaningfull	1	e	l	e	156	460	156	gist107_1	120	Old	1	0	3	e	2			2	MF_old_120_1				l = vu
P01	0 immédiat	paysage19	champ	paysage	Old	meaningfull	1	r	l	r	268	572	268	gist119_1	120	Old	1	0	4	r	1			1	MF_old_120_1		MF_N_oldGist_120_1 = meaningful _New old-gist lures _120ms _1 presentation		s = pas vu
P01	0 immédiat	paysage25	route	paysage	Old	meaningfull	1	e	s	e	2389	1214	2389	gist125_4	120	Old	0	1	3			e	7	7	MF_old_120_1		MF_N_oldGist_120_2 = meaningful _New old-gist lures _120ms _2 presentations
P01	0 immédiat	objet isole5	eponde	objet isole	Old	meaningfull	1	r	l	r	236	229	236	gist155_1	120	Old	1	0	4	r	1			1	MF_old_120_1		MF_N_oldGist_1920_1 = meaningful _New old-gist lures _1920ms _1 presentation
P01	0 immédiat	objet isole13	ciseau	objet isole	Old	meaningfull	1	r	l	r	124	506	124	gist162_1	120	Old	1	0	4	r	1			1	MF_old_120_1		MF_N_oldGist_1920_2 = meaningful _New old-gist lures _1920ms _2 presentations
P01	0 immédiat	objet isole23	des	objet isole	Old	meaningfull	1	r	l	r	1220	790	1220	gist172_1	120	Old	1	0	4	r	1			1	MF_old_120_1
P01	0 immédiat	objet isole31	spatule	objet isole	Old	meaningfull	1	r	l	r	212	501	212	gist180_1	120	Old	1	0	4	r	1			1	MF_old_120_1
P01	0 immédiat	fuit/legumes isoles9	pasteque	fruits/legumes	Old	meaningfull	1	r	l	r	116	396	116	gist409_1	120	Old	1	0	4	r	1			1	MF_old_120_1		MF_new = meaningful New
P01	0 immédiat	fuit/legumes isoles30	choux	fruits/legumes	Old	meaningfull	1	r	l	r	148	413	148	gist430_2	120	Old	1	0	4	r	1			1	MF_old_120_1
P01	0 immédiat	fuit/legumes isoles36	paplemousse	fruits/legumes	Old	meaningfull	1	r	l	r	107	366	107	gist436_2	120	Old	1	0	4	r	1			1	MF_old_120_1
P01	0 immédiat	fuit/legumes isoles45	haricot	fruits/legumes	Old	meaningfull	1	r	s	r	2597	222	2597	gist446_2	120	Old	0	1	4			r	8	8	MF_old_120_1		ML_old_120_1 = meaningless _old _120ms _1 presentation
P01	0 immédiat	fuit/legumes isoles56	poivron	fruits/legumes	Old	meaningfull	1	r	s	r	108	297	108	gist457_1	120	Old	0	1	4			r	8	8	MF_old_120_1		ML_old_120_2 = meaningless _old _120ms _2 presentations
P01	0 immédiat	animal8	tortue	animal	Old	meaningfull	2	r	l	r	316	354	316	gist008_1	120	Old	1	0	4	r	1			1	MF_old_120_2		ML_old_1920_1 = meaningless _old _1920ms _1 presentation
P01	0 immédiat	animal21	rinoceroce	animal	Old	meaningfull	2	r	l	r	212	334	212	gist021_1	120	Old	1	0	4	r	1			1	MF_old_120_2		ML_old_1920_2 = meaningless _old _1920ms _2 presentations
P01	0 immédiat	animal31	loup	animal	Old	meaningfull	2	r	l	r	156	303	156	gist031_1	120	Old	1	0	4	r	1			1	MF_old_120_2
P01	0 immédiat	animal40	cerf	animal	Old	meaningfull	2	r	l	r	204	488	204	gist040_2	120	Old	1	0	4	r	1			1	MF_old_120_2		ML_new = meaningless New
P01	0 immédiat	animal45	kangourou	animal	Old	meaningfull	2	r	l	r	244	527	244	gist045_1	120	Old	1	0	4	r	1			1	MF_old_120_2
P01	0 immédiat	animal54	mouton	animal	Old	meaningfull	2	r	s	r	2885	386	2885	gist054_1	120	Old	0	1	4			r	8	8	MF_old_120_2		ROC index = Y
P01	0 immédiat	animal67	pinguin	animal	Old	meaningfull	2	r	l	r	308	438	308	gist067_1	120	Old	1	0	4	r	1			1	MF_old_120_2		1-4 : Hit/FA (from very sure to guess)
P01	0 immédiat	paysage2	plage	paysage	Old	meaningfull	2	r	l	r	316	451	316	gist102_1	120	Old	1	0	4	r	1			1	MF_old_120_2		5-8 : miss/correct rejection (from guess to very sure)
P01	0 immédiat	paysage13	desert:steppe	paysage	Old	meaningfull	2	r	l	r	156	349	156	gist113_2	120	Old	1	0	4	r	1			1	MF_old_120_2
P01	0 immédiat	paysage25	route	paysage	Old	meaningfull	2	r	l	r	67	762	67	gist125_1	120	Old	1	0	4	r	1			1	MF_old_120_2
P01	0 immédiat	objet isole3	brosse Ã dent	objet isole	Old	meaningfull	2	r	l	r	164	333	164	gist153_1	120	Old	1	0	4	r	1			1	MF_old_120_2		participant = A
P01	0 immédiat	objet isole11	toune_visse	objet isole	Old	meaningfull	2	r	l	r	427	38	427	gist160_1	120	Old	1	0	4	r	1			1	MF_old_120_2		Delay = B
P01	0 immédiat	objet isole16	couverts	objet isole	Old	meaningfull	2	r	s	r	355	414	355	gist165_1	120	Old	0	1	4			r	8	8	MF_old_120_2		Hit/FA = R
P01	0 immédiat	objet isole26	scie	objet isole	Old	meaningfull	2	r	l	r	356	520	356	gist175_1	120	Old	1	0	4	r	1			1	MF_old_120_2
P01	0 immédiat	fuit/legumes isoles3	orange	fruits/legumes	Old	meaningfull	2	r	l	r	124	486	124	gist403_2	120	Old	1	0	4	r	1			1	MF_old_120_2
P01	0 immédiat	fuit/legumes isoles19	tomate	fruits/legumes	Old	meaningfull	2	e	l	e	461	392	461	gist419_1	120	Old	1	0	3	e	2			2	MF_old_120_2
P01	0 immédiat	fuit/legumes isoles33	myrtille	fruits/legumes	Old	meaningfull	2	r	l	r	92	537	92	gist433_2	120	Old	1	0	4	r	1			1	MF_old_120_2
P01	0 immédiat	fuit/legumes isoles40	jambon	fruits/legumes	Old	meaningfull	2	r	s	r	188	338	188	gist440_2	120	Old	0	1	4			r	8	8	MF_old_120_2
P01	0 immédiat	fuit/legumes isoles51	blette	fruits/legumes	Old	meaningfull	2	r	l	r	236	384	236	gist451_2	120	Old	1	0	4	r	1			1	MF_old_120_2
P01	0 immédiat	fuit/legumes isoles59	radis	fruits/legumes	Old	meaningfull	2	r	l	r	196	94	196	gist461_1	120	Old	1	0	4	r	1			1	MF_old_120_2
P01	0 immédiat	animal6	grenouille	animal	Old	meaningfull	1	r	l	r	84	414	84	gist006_1	1920	Old	1	0	4	r	1			1	MF_old_1920_1
P01	0 immédiat	animal18	ours polaire	animal	Old	meaningfull	1	r	l	r	172	538	172	gist018_2	1920	Old	1	0	4	r	1			1	MF_old_1920_1
P01	0 immédiat	animal30	chien	animal	Old	meaningfull	1	r	l	r	1412	798	1412	gist030_1	1920	Old	1	0	4	r	1			1	MF_old_1920_1
P01	0 immédiat	animal38	zebre	animal	Old	meaningfull	1	r	l	r	108	662	108	gist038_1	1920	Old	1	0	4	r	1			1	MF_old_1920_1
P01	0 immédiat	animal44	vache	animal	Old	meaningfull	1	r	l	r	155	474	155	gist044_2	1920	Old	1	0	4	r	1			1	MF_old_1920_1
P01	0 immédiat	animal53	bison	animal	Old	meaningfull	1	r	l	r	148	470	148	gist053_1	1920	Old	1	0	4	r	1			1	MF_old_1920_1
P01	0 immédiat	animal62	ane	animal	Old	meaningfull	1	r	l	r	204	582	204	gist062_1	1920	Old	1	0	4	r	1			1	MF_old_1920_1
P01	0 immédiat	animal80	coq	animal	Old	meaningfull	1	r	l	r	332	540	332	gist080_1	1920	Old	1	0	4	r	1			1	MF_old_1920_1
P01	0 immédiat	paysage11	montagne	paysage	Old	meaningfull	1	r	l	r	92	467	92	gist111_1	1920	Old	1	0	4	r	1			1	MF_old_1920_1
P01	0 immédiat	paysage20	champ	paysage	Old	meaningfull	1	r	l	r	245	1456	245	gist120_1	1920	Old	1	0	4	r	1			1	MF_old_1920_1
P01	0 immédiat	paysage25	route	paysage	Old	meaningfull	1	r	l	r	124	862	124	gist125_2	1920	Old	1	0	4	r	1			1	MF_old_1920_1
P01	0 immédiat	objet isole4	peigne	objet isole	Old	meaningfull	1	r	l	r	132	438	132	gist154_1	1920	Old	1	0	4	r	1			1	MF_old_1920_1
P01	0 immédiat	objet isole14	pince Ã linge	objet isole	Old	meaningfull	1	r	l	r	252	442	252	gist163_1	1920	Old	1	0	4	r	1			1	MF_old_1920_1
P01	0 immédiat	objet isole24	pince	objet isole	Old	meaningfull	1	r	l	r	260	537	260	gist173_1	1920	Old	1	0	4	r	1			1	MF_old_1920_1
P01	0 immédiat	fuit/legumes isoles1	pomme	fruits/legumes	Old	meaningfull	1	r	l	r	132	548	132	gist401_1	1920	Old	1	0	4	r	1			1	MF_old_1920_1
P01	0 immédiat	fuit/legumes isoles18	champignion	fruits/legumes	Old	meaningfull	1	r	l	r	44	260	44	gist418_2	1920	Old	1	0	4	r	1			1	MF_old_1920_1
P01	0 immédiat	fuit/legumes isoles32	cacahouette	fruits/legumes	Old	meaningfull	1	r	l	r	92	522	92	gist432_2	1920	Old	1	0	4	r	1			1	MF_old_1920_1
P01	0 immédiat	fuit/legumes isoles39	poulet	fruits/legumes	Old	meaningfull	1	r	l	r	116	365	116	gist439_2	1920	Old	1	0	4	r	1			1	MF_old_1920_1
P01	0 immédiat	fuit/legumes isoles47	avocat	fruits/legumes	Old	meaningfull	1	r	l	r	164	371	164	gist448_1	1920	Old	1	0	4	r	1			1	MF_old_1920_1
P01	0 immédiat	fuit/legumes isoles58	croissant	fruits/legumes	Old	meaningfull	1	r	l	r	172	410	172	gist460_1	1920	Old	1	0	4	r	1			1	MF_old_1920_1
P01	0 immédiat	animal13	chenille	animal	Old	meaningfull	2	r	l	r	292	468	292	gist013_2	1920	Old	1	0	4	r	1			1	MF_old_1920_2
P01	0 immédiat	animal22	elephant	animal	Old	meaningfull	2	r	l	r	188	350	188	gist022_2	1920	Old	1	0	4	r	1			1	MF_old_1920_2
P01	0 immédiat	animal33	panthÃ¨re	animal	Old	meaningfull	2	r	l	r	603	1341	603	gist033_1	1920	Old	1	0	4	r	1			1	MF_old_1920_2
P01	0 immédiat	animal41	oxyx	animal	Old	meaningfull	2	r	l	r	180	302	180	gist041_2	1920	Old	1	0	4	r	1			1	MF_old_1920_2
P01	0 immédiat	animal48	ecureuil	animal	Old	meaningfull	2	r	l	r	180	385	180	gist048_1	1920	Old	1	0	4	r	1			1	MF_old_1920_2
P01	0 immédiat	animal56	gorille	animal	Old	meaningfull	2	r	l	r	92	465	92	gist056_1	1920	Old	1	0	4	r	1			1	MF_old_1920_2
P01	0 immédiat	animal77	flaman rose	animal	Old	meaningfull	2	r	l	r	132	473	132	gist077_1	1920	Old	1	0	4	r	1			1	MF_old_1920_2
P01	0 immédiat	paysage4	rocher	paysage	Old	meaningfull	2	r	l	r	212	595	212	gist104_2	1920	Old	1	0	4	r	1			1	MF_old_1920_2
P01	0 immédiat	paysage16	champ de fleur	paysage	Old	meaningfull	2	r	l	r	1076	528	1076	gist116_1	1920	Old	1	0	4	r	1			1	MF_old_1920_2
P01	0 immédiat	paysage25	route	paysage	Old	meaningfull	2	r	l	r	252	385	252	gist125_10	1920	Old	1	0	4	r	1			1	MF_old_1920_2
P01	0 immédiat	paysage25	route	paysage	Old	meaningfull	2	r	l	r	156	2335	156	gist125_8	1920	Old	1	0	4	r	1			1	MF_old_1920_2
P01	0 immédiat	objet isole8	epingles nourisse	objet isole	Old	meaningfull	2	r	l	r	140	537	140	gist157_2	1920	Old	1	0	4	r	1			1	MF_old_1920_2
P01	0 immédiat	objet isole22	raquette	objet isole	Old	meaningfull	2	r	l	r	156	305	156	gist171_1	1920	Old	1	0	4	r	1			1	MF_old_1920_2
P01	0 immédiat	objet isole28	cle	objet isole	Old	meaningfull	2	r	l	r	1123	754	1123	gist177_1	1920	Old	1	0	4	r	1			1	MF_old_1920_2
P01	0 immédiat	fuit/legumes isoles5	raisin	fruits/legumes	Old	meaningfull	2	r	l	r	124	527	124	gist405_1	1920	Old	1	0	4	r	1			1	MF_old_1920_2
P01	0 immédiat	fuit/legumes isoles28	cookies	fruits/legumes	Old	meaningfull	2	r	l	r	212	303	212	gist428_2	1920	Old	1	0	4	r	1			1	MF_old_1920_2
P01	0 immédiat	fuit/legumes isoles34	mur	fruits/legumes	Old	meaningfull	2	r	l	r	332	727	332	gist434_2	1920	Old	1	0	4	r	1			1	MF_old_1920_2
P01	0 immédiat	fuit/legumes isoles43	cafe	fruits/legumes	Old	meaningfull	2	r	l	r	116	309	116	gist443_2	1920	Old	1	0	4	r	1			1	MF_old_1920_2
P01	0 immédiat	fuit/legumes isoles52	datte	fruits/legumes	Old	meaningfull	2	r	l	r	100	361	100	gist452_3	1920	Old	1	0	4	r	1			1	MF_old_1920_2
P01	0 immédiat	fuit/legumes isoles60	carotte	fruits/legumes	Old	meaningfull	2	r	l	r	172	381	172	gist462_1	1920	Old	1	0	4	r	1			1	MF_old_1920_2
P01	0 immédiat	animal1	escargot	animal	New-oldGist	meaningfull	1	e	s	e	540	552	540	gist001_2	120	R-gist	0	1	3			e	7	7	MF_N_oldGist_120_1
P01	0 immédiat	animal16	phoque	animal	New-oldGist	meaningfull	1	r	s	r	372	314	372	gist016_2	120	R-gist	0	1	4			r	8	8	MF_N_oldGist_120_1
P01	0 immédiat	animal68	cygne	animal	New-oldGist	meaningfull	1	e	s	e	268	208	268	gist068_2	120	R-gist	0	1	3			e	7	7	MF_N_oldGist_120_1
P01	0 immédiat	paysage1	ciel	paysage	New-oldGist	meaningfull	1	r	s	r	220	166	220	gist101_2	120	R-gist	0	1	4			r	8	8	MF_N_oldGist_120_1
P01	0 immédiat	paysage17	banquise	paysage	New-oldGist	meaningfull	1	r	s	r	155	351	155	gist117_1	120	R-gist	0	1	4			r	8	8	MF_N_oldGist_120_1
P01	0 immédiat	paysage27	fougÃ¨re	paysage	New-oldGist	meaningfull	1	r	s	r	220	309	220	gist127_2	120	R-gist	0	1	4			r	8	8	MF_N_oldGist_120_1
P01	0 immédiat	objet isole2	brosse	objet isole	New-oldGist	meaningfull	1	r	s	r	220	314	220	gist152_2	120	R-gist	0	1	4			r	8	8	MF_N_oldGist_120_1
P01	0 immédiat	fuit/legumes isoles2	poire	fruits/legumes	New-oldGist	meaningfull	1	r	s	r	308	366	308	gist402_1	120	R-gist	0	1	4			r	8	8	MF_N_oldGist_120_1
P01	0 immédiat	fuit/legumes isoles26	fromage	fruits/legumes	New-oldGist	meaningfull	1	r	s	r	900	660	900	gist426_2	120	R-gist	0	1	4			r	8	8	MF_N_oldGist_120_1
P01	0 immédiat	fuit/legumes isoles42	steak	fruits/legumes	New-oldGist	meaningfull	1	r	l	r	1420	772	1420	gist442_2	120	R-gist	1	0	4	r	1			1	MF_N_oldGist_120_1
P01	0 immédiat	animal4	champigon	animal	New-oldGist	meaningfull	2	r	s	r	92	384	92	gist004_1	120	R-gist	0	1	4			r	8	8	MF_N_oldGist_120_2
P01	0 immédiat	animal43	chameau	animal	New-oldGist	meaningfull	2	r	l	r	123	399	123	gist043_2	120	R-gist	1	0	4	r	1			1	MF_N_oldGist_120_2
P01	0 immédiat	animal76	paon	animal	New-oldGist	meaningfull	2	r	s	r	420	790	420	gist076_2	120	R-gist	0	1	4			r	8	8	MF_N_oldGist_120_2
P01	0 immédiat	paysage9	montagne eneige	paysage	New-oldGist	meaningfull	2	r	s	r	661	2076	661	gist109_2	120	R-gist	0	1	4			r	8	8	MF_N_oldGist_120_2
P01	0 immédiat	paysage25	route	paysage	New-oldGist	meaningfull	2	r	s	r	172	408	172	gist125_6	120	R-gist	0	1	4			r	8	8	MF_N_oldGist_120_2
P01	0 immédiat	paysage30	grotte	paysage	New-oldGist	meaningfull	2	r	s	r	1861	1981	1861	gist130_2	120	R-gist	0	1	4			r	8	8	MF_N_oldGist_120_2
P01	0 immédiat	objet isole12	pinceau	objet isole	New-oldGist	meaningfull	2	z	s	z	228	715	228	gist161_2	120	R-gist	0	1	2			z	6	6	MF_N_oldGist_120_2
P01	0 immédiat	fuit/legumes isoles6	noix de coco	fruits/legumes	New-oldGist	meaningfull	2	e	s	e	260	377	260	gist406_1	120	R-gist	0	1	3			e	7	7	MF_N_oldGist_120_2
P01	0 immédiat	fuit/legumes isoles37	pÃªche	fruits/legumes	New-oldGist	meaningfull	2	r	s	r	292	458	292	gist437_3	120	R-gist	0	1	4			r	8	8	MF_N_oldGist_120_2
P01	0 immédiat	fuit/legumes isoles49	kaki	fruits/legumes	New-oldGist	meaningfull	2	r	s	r	740	330	740	gist449_2	120	R-gist	0	1	4			r	8	8	MF_N_oldGist_120_2
P01	0 immédiat	animal3	sauterelle	animal	New-oldGist	meaningfull	1	z	l	z	332	1118	332	gist003_1	1920	R-gist	1	0	2	z	3			3	MF_N_oldGist_1920_1
P01	0 immédiat	animal39	cheval	animal	New-oldGist	meaningfull	1	r	l	r	100	402	100	gist039_1	1920	R-gist	1	0	4	r	1			1	MF_N_oldGist_1920_1
P01	0 immédiat	animal75	perroquet	animal	New-oldGist	meaningfull	1	r	s	r	309	344	309	gist075_2	1920	R-gist	0	1	4			r	8	8	MF_N_oldGist_1920_1
P01	0 immédiat	paysage8	grand canyon	paysage	New-oldGist	meaningfull	1	r	l	r	164	287	164	gist108_2	1920	R-gist	1	0	4	r	1			1	MF_N_oldGist_1920_1
P01	0 immédiat	paysage23	cascade	paysage	New-oldGist	meaningfull	1	r	s	r	211	338	211	gist123_2	1920	R-gist	0	1	4			r	8	8	MF_N_oldGist_1920_1
P01	0 immédiat	paysage28	farwest	paysage	New-oldGist	meaningfull	1	r	s	r	140	378	140	gist128_2	1920	R-gist	0	1	4			r	8	8	MF_N_oldGist_1920_1
P01	0 immédiat	objet isole10	marteau	objet isole	New-oldGist	meaningfull	1	e	l	e	140	338	140	gist159_2	1920	R-gist	1	0	3	e	2			2	MF_N_oldGist_1920_1
P01	0 immédiat	fuit/legumes isoles4	banane	fruits/legumes	New-oldGist	meaningfull	1	r	s	r	164	410	164	gist404_3	1920	R-gist	0	1	4			r	8	8	MF_N_oldGist_1920_1
P01	0 immédiat	fuit/legumes isoles27	pain	fruits/legumes	New-oldGist	meaningfull	1	e	s	e	189	324	189	gist427_2	1920	R-gist	0	1	3			e	7	7	MF_N_oldGist_1920_1
P01	0 immédiat	fuit/legumes isoles46	Å“uf	fruits/legumes	New-oldGist	meaningfull	1	r	s	r	228	297	228	gist447_2	1920	R-gist	0	1	4			r	8	8	MF_N_oldGist_1920_1
P01	0 immédiat	animal15	poisson	animal	New-oldGist	meaningfull	2	r	s	r	244	413	244	gist015_2	1920	R-gist	0	1	4			r	8	8	MF_N_oldGist_1920_2
P01	0 immédiat	animal47	chevre	animal	New-oldGist	meaningfull	2	r	s	r	27	61	27	gist047_2	1920	R-gist	0	1	4			r	8	8	MF_N_oldGist_1920_2
P01	0 immédiat	animal78	casoar	animal	New-oldGist	meaningfull	2	r	s	r	316	250	316	gist078_2	1920	R-gist	0	1	4			r	8	8	MF_N_oldGist_1920_2
P01	0 immédiat	paysage15	fond marin	paysage	New-oldGist	meaningfull	2	r	s	r	356	333	356	gist115_2	1920	R-gist	0	1	4			r	8	8	MF_N_oldGist_1920_2
P01	0 immédiat	paysage25	route	paysage	New-oldGist	meaningfull	2	e	s	e	732	1159	732	gist125_7	1920	R-gist	0	1	3			e	7	7	MF_N_oldGist_1920_2
P01	0 immédiat	objet isole1	balle	objet isole	New-oldGist	meaningfull	2	r	l	r	140	304	140	gist151_2	1920	R-gist	1	0	4	r	1			1	MF_N_oldGist_1920_2
P01	0 immédiat	objet isole17	compa	objet isole	New-oldGist	meaningfull	2	r	s	r	380	734	380	gist166_2	1920	R-gist	0	1	4			r	8	8	MF_N_oldGist_1920_2
P01	0 immédiat	fuit/legumes isoles22	mais	fruits/legumes	New-oldGist	meaningfull	2	r	s	r	156	395	156	gist422_3	1920	R-gist	0	1	4			r	8	8	MF_N_oldGist_1920_2
P01	0 immédiat	fuit/legumes isoles38	brocoli	fruits/legumes	New-oldGist	meaningfull	2	r	s	r	292	571	292	gist438_3	1920	R-gist	0	1	4			r	8	8	MF_N_oldGist_1920_2
P01	0 immédiat	fuit/legumes isoles57	pizza	fruits/legumes	New-oldGist	meaningfull	2	r	s	r	443	336	443	gist459_2	1920	R-gist	0	1	4			r	8	8	MF_N_oldGist_1920_2
P01	0 immédiat	animal11	varan	animal	New	meaningfull	0	e	s	e	156	399	156	gist011_1		R-newgist	0	1	3			e	7	7	MF_new
P01	0 immédiat	animal12	punaise	animal	New	meaningfull	0	r	s	r	1044	600	1044	gist012_1		R-newgist	0	1	4			r	8	8	MF_new
P01	0 immédiat	animal14	libellule	animal	New	meaningfull	0	e	s	e	404	610	404	gist014_1		R-newgist	0	1	3			e	7	7	MF_new
P01	0 immédiat	animal19	orque	animal	New	meaningfull	0	r	s	r	540	380	540	gist019_1		R-newgist	0	1	4			r	8	8	MF_new
P01	0 immédiat	animal23	buffle	animal	New	meaningfull	0	r	s	r	372	77	372	gist023_1		R-newgist	0	1	4			r	8	8	MF_new
P01	0 immédiat	animal24	hippopotame	animal	New	meaningfull	0	r	s	r	340	389	340	gist024_1		R-newgist	0	1	4			r	8	8	MF_new
P01	0 immédiat	animal32	renard	animal	New	meaningfull	0	e	l	e	220	3069	220	gist032_1		R-newgist	1	0	3	e	2			2	MF_new
P01	0 immédiat	animal34	lion	animal	New	meaningfull	0	r	s	r	164	466	164	gist034_4		R-newgist	0	1	4			r	8	8	MF_new
P01	0 immédiat	animal36	chat	animal	New	meaningfull	0	r	s	r	220	279	220	gist036_2		R-newgist	0	1	4			r	8	8	MF_new
P01	0 immédiat	animal46	leopard	animal	New	meaningfull	0	r	l	r	92	465	92	gist046_2		R-newgist	1	0	4	r	1			1	MF_new
P01	0 immédiat	animal120	blereau	animal	New	meaningfull	0	r	s	r	196	310	196	gist050_2		R-newgist	0	1	4			r	8	8	MF_new
P01	0 immédiat	animal55	singe	animal	New	meaningfull	0	z	l	z	123	696	123	gist055_1		R-newgist	1	0	2	z	3			3	MF_new
P01	0 immédiat	animal66	autruche	animal	New	meaningfull	0	r	l	r	363	1504	363	gist066_1		R-newgist	1	0	4	r	1			1	MF_new
P01	0 immédiat	animal69	oiseau	animal	New	meaningfull	0	e	s	e	156	283	156	gist069_1		R-newgist	0	1	3			e	7	7	MF_new
P01	0 immédiat	animal71	oie	animal	New	meaningfull	0	r	s	r	443	563	443	gist071_1		R-newgist	0	1	4			r	8	8	MF_new
P01	0 immédiat	animal72	oiseau2	animal	New	meaningfull	0	r	s	r	1013	368	1013	gist072_1		R-newgist	0	1	4			r	8	8	MF_new
P01	0 immédiat	paysage5	coucher de soleil	paysage	New	meaningfull	0	r	s	r	236	403	236	gist105_1		R-newgist	0	1	4			r	8	8	MF_new
P01	0 immédiat	paysage7	foret	paysage	New	meaningfull	0	r	s	r	356	755	356	gist107_2		R-newgist	0	1	4			r	8	8	MF_new
P01	0 immédiat	paysage10	montagne	paysage	New	meaningfull	0	r	s	r	524	429	524	gist110_1		R-newgist	0	1	4			r	8	8	MF_new
P01	0 immédiat	paysage18	neige	paysage	New	meaningfull	0	r	s	r	164	913	164	gist118_1		R-newgist	0	1	4			r	8	8	MF_new
P01	0 immédiat	paysage22	mer/montagne	paysage	New	meaningfull	0	z	s	z	468	444	468	gist122_1		R-newgist	0	1	2			z	6	6	MF_new
P01	0 immédiat	paysage26	desert	paysage	New	meaningfull	0	e	s	e	1243	2312	1243	gist126_1		R-newgist	0	1	3			e	7	7	MF_new
P01	0 immédiat	objet isole7	trombone	objet isole	New	meaningfull	0	r	s	r	252	1305	252	gist157_1		R-newgist	0	1	4			r	8	8	MF_new
P01	0 immédiat	objet isole9	fil	objet isole	New	meaningfull	0	r	s	r	580	387	580	gist158_1		R-newgist	0	1	4			r	8	8	MF_new
P01	0 immédiat	objet isole15	crayon	objet isole	New	meaningfull	0	e	l	e	284	362	284	gist164_1		R-newgist	1	0	3	e	2			2	MF_new
P01	0 immédiat	objet isole27	pioche	objet isole	New	meaningfull	0	r	s	r	140	387	140	gist176_1		R-newgist	0	1	4			r	8	8	MF_new
P01	0 immédiat	objet isole29	mÃ¨che	objet isole	New	meaningfull	0	r	s	r	132	337	132	gist178_1		R-newgist	0	1	4			r	8	8	MF_new
P01	0 immédiat	objet isole30	niveau	objet isole	New	meaningfull	0	r	s	r	212	489	212	gist179_1		R-newgist	0	1	4			r	8	8	MF_new
P01	0 immédiat	fuit/legumes isoles11	kiwi	fruits/legumes	New	meaningfull	0	r	s	r	268	357	268	gist411_1		R-newgist	0	1	4			r	8	8	MF_new
P01	0 immédiat	fuit/legumes isoles13	citron vert	fruits/legumes	New	meaningfull	0	r	s	r	324	463	324	gist413_1		R-newgist	0	1	4			r	8	8	MF_new
P01	0 immédiat	fuit/legumes isoles15	amande	fruits/legumes	New	meaningfull	0	r	s	r	340	947	340	gist415_2		R-newgist	0	1	4			r	8	8	MF_new
P01	0 immédiat	fuit/legumes isoles16	litchi	fruits/legumes	New	meaningfull	0	r	s	r	804	282	804	gist416_1		R-newgist	0	1	4			r	8	8	MF_new
P01	0 immédiat	fuit/legumes isoles17	melon	fruits/legumes	New	meaningfull	0	r	s	r	116	339	116	gist417_1		R-newgist	0	1	4			r	8	8	MF_new
P01	0 immédiat	fuit/legumes isoles20	courgette	fruits/legumes	New	meaningfull	0	e	s	e	220	331	220	gist420_1		R-newgist	0	1	3			e	7	7	MF_new
P01	0 immédiat	fuit/legumes isoles21	framboise	fruits/legumes	New	meaningfull	0	r	s	r	156	350	156	gist421_1		R-newgist	0	1	4			r	8	8	MF_new
P01	0 immédiat	fuit/legumes isoles23	gateau	fruits/legumes	New	meaningfull	0	r	s	r	652	394	652	gist423_2		R-newgist	0	1	4			r	8	8	MF_new
P01	0 immédiat	fuit/legumes isoles24	hotdog	fruits/legumes	New	meaningfull	0	r	s	r	244	293	244	gist424_2		R-newgist	0	1	4			r	8	8	MF_new
P01	0 immédiat	fuit/legumes isoles35	patate	fruits/legumes	New	meaningfull	0	r	s	r	196	414	196	gist435_2		R-newgist	0	1	4			r	8	8	MF_new
P01	0 immédiat	fuit/legumes isoles44	noisette	fruits/legumes	New	meaningfull	0	r	s	r	348	479	348	gist444_2		R-newgist	0	1	4			r	8	8	MF_new
P01	0 immédiat	fuit/legumes isoles48	figue	fruits/legumes	New	meaningfull	0	r	s	r	276	312	276	gist448_3		R-newgist	0	1	4			r	8	8	MF_new
P01	0 immédiat	meaningless091	meanigless	meanigless	New	meaningless	0	r	s	r	300	347	300	Image0007		New	0	1	4			r	8	8	ML_new
P01	0 immédiat	meaningless109	meanigless	meanigless	New	meaningless	0	e	s	e	180	351	180	Image0008		New	0	1	3			e	7	7	ML_new
P01	0 immédiat	meaningless127	meanigless	meanigless	New	meaningless	0	e	l	e	164	373	164	Image0011		New	1	0	3	e	2			2	ML_new
P01	0 immédiat	meaningless159	meanigless	meanigless	New	meaningless	0	r	s	r	268	403	268	Image0016		New	0	1	4			r	8	8	ML_new
P01	0 immédiat	meaningless145	meanigless	meanigless	New	meaningless	0	e	s	e	196	275	196	Image0069		New	0	1	3			e	7	7	ML_new
P01	0 immédiat	meaningless092	meanigless	meanigless	New	meaningless	0	z	l	z	180	782	180	Image0084		New	1	0	2	z	3			3	ML_new
P01	0 immédiat	meaningless110	meanigless	meanigless	New	meaningless	0	r	s	r	212	497	212	Image0085		New	0	1	4			r	8	8	ML_new
P01	0 immédiat	meaningless141	meanigless	meanigless	New	meaningless	0	e	s	e	789	372	789	Image0086		New	0	1	3			e	7	7	ML_new
P01	0 immédiat	meaningless160	meanigless	meanigless	New	meaningless	0	e	l	e	1012	529	1012	Image0089		New	1	0	3	e	2			2	ML_new
P01	0 immédiat	meaningless146	meanigless	meanigless	New	meaningless	0	r	s	r	3684	445	3684	Image0103		New	0	1	4			r	8	8	ML_new
P01	0 immédiat	meaningless093	meanigless	meanigless	New	meaningless	0	r	s	r	380	287	380	Image0119		New	0	1	4			r	8	8	ML_new
P01	0 immédiat	meaningless111	meanigless	meanigless	New	meaningless	0	r	l	r	124	492	124	Image0122		New	1	0	4	r	1			1	ML_new
P01	0 immédiat	meaningless128	meanigless	meanigless	New	meaningless	0	r	s	r	124	1758	124	Image0123		New	0	1	4			r	8	8	ML_new
P01	0 immédiat	meaningless147	meanigless	meanigless	New	meaningless	0	e	s	e	796	1051	796	Image0155		New	0	1	3			e	7	7	ML_new
P01	0 immédiat	meaningless094	meanigless	meanigless	New	meaningless	0	r	s	r	172	383	172	Image0171		New	0	1	4			r	8	8	ML_new
P01	0 immédiat	meaningless112	meanigless	meanigless	New	meaningless	0	e	s	e	164	101	164	Image0172		New	0	1	3			e	7	7	ML_new
P01	0 immédiat	meaningless129	meanigless	meanigless	New	meaningless	0	e	s	e	2044	384	2044	Image0174		New	0	1	3			e	7	7	ML_new
P01	0 immédiat	meaningless105	meanigless	meanigless	New	meaningless	0	z	l	z	660	1099	660	Image0201		New	1	0	2	z	3			3	ML_new
P01	0 immédiat	meaningless123	meanigless	meanigless	New	meaningless	0	r	s	r	212	271	212	Image0202		New	0	1	4			r	8	8	ML_new
P01	0 immédiat	meaningless148	meanigless	meanigless	New	meaningless	0	r	s	r	676	120	676	Image0214		New	0	1	4			r	8	8	ML_new
P01	0 immédiat	meaningless095	meanigless	meanigless	New	meaningless	0	e	s	e	204	861	204	Image0235		New	0	1	3			e	7	7	ML_new
P01	0 immédiat	meaningless124	meanigless	meanigless	New	meaningless	0	r	s	r	228	252	228	Image0239		New	0	1	4			r	8	8	ML_new
P01	0 immédiat	meaningless130	meanigless	meanigless	New	meaningless	0	e	l	e	196	340	196	Image0240		New	1	0	3	e	2			2	ML_new
P01	0 immédiat	meaningless149	meanigless	meanigless	New	meaningless	0	e	s	e	435	106	435	Image0340		New	0	1	3			e	7	7	ML_new
P01	0 immédiat	meaningless087	meanigless	meanigless	New	meaningless	0	r	s	r	372	407	372	Image0381		New	0	1	4			r	8	8	ML_new
P01	0 immédiat	meaningless096	meanigless	meanigless	New	meaningless	0	e	s	e	172	372	172	Image0386		New	0	1	3			e	7	7	ML_new
P01	0 immédiat	meaningless113	meanigless	meanigless	New	meaningless	0	e	s	e	164	533	164	Image0402		New	0	1	3			e	7	7	ML_new
P01	0 immédiat	meaningless131	meanigless	meanigless	New	meaningless	0	r	s	r	196	337	196	Image0403		New	0	1	4			r	8	8	ML_new
P01	0 immédiat	meaningless097	meanigless	meanigless	New	meaningless	0	r	s	r	389	1173	389	Image0456		New	0	1	4			r	8	8	ML_new
P01	0 immédiat	meaningless114	meanigless	meanigless	New	meaningless	0	e	l	e	124	689	124	Image0457		New	1	0	3	e	2			2	ML_new
P01	0 immédiat	meaningless132	meanigless	meanigless	New	meaningless	0	e	s	e	156	343	156	Image0458		New	0	1	3			e	7	7	ML_new
P01	0 immédiat	meaningless150	meanigless	meanigless	New	meaningless	0	r	s	r	180	351	180	Image0476		New	0	1	4			r	8	8	ML_new
P01	0 immédiat	meaningless098	meanigless	meanigless	New	meaningless	0	e	s	e	380	380	380	Image0486		New	0	1	3			e	7	7	ML_new
P01	0 immédiat	meaningless115	meanigless	meanigless	New	meaningless	0	r	s	r	236	813	236	Image0487		New	0	1	4			r	8	8	ML_new
P01	0 immédiat	meaningless133	meanigless	meanigless	New	meaningless	0	e	l	e	300	1316	300	Image0488		New	1	0	3	e	2			2	ML_new
P01	0 immédiat	meaningless151	meanigless	meanigless	New	meaningless	0	e	s	e	180	284	180	Image0609		New	0	1	3			e	7	7	ML_new
P01	0 immédiat	meaningless099	meanigless	meanigless	New	meaningless	0	e	s	e	268	303	268	Image0617		New	0	1	3			e	7	7	ML_new
P01	0 immédiat	meaningless116	meanigless	meanigless	New	meaningless	0	r	l	r	276	397	276	Image0618		New	1	0	4	r	1			1	ML_new
P01	0 immédiat	meaningless134	meanigless	meanigless	New	meaningless	0	z	l	z	228	165	228	Image0619		New	1	0	2	z	3			3	ML_new
P01	0 immédiat	meaningless088	meanigless	meanigless	New	meaningless	0	e	s	e	756	2238	756	Image0630		New	0	1	3			e	7	7	ML_new
P01	0 immédiat	meaningless152	meanigless	meanigless	New	meaningless	0	r	s	r	1492	667	1492	Image0635		New	0	1	4			r	8	8	ML_new
P01	0 immédiat	meaningless081	meanigless	meanigless	New	meaningless	0	e	l	e	380	2008	380	Image0643		New	1	0	3	e	2			2	ML_new
P01	0 immédiat	meaningless100	meanigless	meanigless	New	meaningless	0	r	l	r	155	302	155	Image0644		New	1	0	4	r	1			1	ML_new
P01	0 immédiat	meaningless117	meanigless	meanigless	New	meaningless	0	z	s	z	532	328	532	Image0645		New	0	1	2			z	6	6	ML_new
P01	0 immédiat	meaningless135	meanigless	meanigless	New	meaningless	0	r	s	r	276	347	276	Image0646		New	0	1	4			r	8	8	ML_new
P01	0 immédiat	meaningless153	meanigless	meanigless	New	meaningless	0	e	s	e	292	649	292	Image0664		New	0	1	3			e	7	7	ML_new
P01	0 immédiat	meaningless082	meanigless	meanigless	New	meaningless	0	r	l	r	308	380	308	Image0671		New	1	0	4	r	1			1	ML_new
P01	0 immédiat	meaningless101	meanigless	meanigless	New	meaningless	0	e	s	e	212	3006	212	Image0672		New	0	1	3			e	7	7	ML_new
P01	0 immédiat	meaningless118	meanigless	meanigless	New	meaningless	0	e	l	e	116	2205	116	Image0673		New	1	0	3	e	2			2	ML_new
P01	0 immédiat	meaningless136	meanigless	meanigless	New	meaningless	0	r	s	r	188	300	188	Image0674		New	0	1	4			r	8	8	ML_new
P01	0 immédiat	meaningless154	meanigless	meanigless	New	meaningless	0	e	s	e	308	340	308	Image0691		New	0	1	3			e	7	7	ML_new
P01	0 immédiat	meaningless083	meanigless	meanigless	New	meaningless	0	r	s	r	900	570	900	Image0698		New	0	1	4			r	8	8	ML_new
P01	0 immédiat	meaningless102	meanigless	meanigless	New	meaningless	0	e	s	e	180	226	180	Image0701		New	0	1	3			e	7	7	ML_new
P01	0 immédiat	meaningless119	meanigless	meanigless	New	meaningless	0	z	s	z	380	315	380	Image0702		New	0	1	2			z	6	6	ML_new
P01	0 immédiat	meaningless137	meanigless	meanigless	New	meaningless	0	e	l	e	252	376	252	Image0704		New	1	0	3	e	2			2	ML_new
P01	0 immédiat	meaningless155	meanigless	meanigless	New	meaningless	0	r	s	r	332	527	332	Image0896		New	0	1	4			r	8	8	ML_new
P01	0 immédiat	meaningless084	meanigless	meanigless	New	meaningless	0	r	s	r	172	516	172	Image0932		New	0	1	4			r	8	8	ML_new
P01	0 immédiat	meaningless103	meanigless	meanigless	New	meaningless	0	r	l	r	52	303	52	Image0933		New	1	0	4	r	1			1	ML_new
P01	0 immédiat	meaningless120	meanigless	meanigless	New	meaningless	0	e	s	e	1964	1211	1964	Image1001		New	0	1	3			e	7	7	ML_new
P01	0 immédiat	meaningless138	meanigless	meanigless	New	meaningless	0	e	l	e	116	404	116	Image1101		New	1	0	3	e	2			2	ML_new
P01	0 immédiat	meaningless156	meanigless	meanigless	New	meaningless	0	e	s	e	308	548	308	Image1207		New	0	1	3			e	7	7	ML_new
P01	0 immédiat	meaningless085	meanigless	meanigless	New	meaningless	0	e	s	e	299	387	299	Image1215		New	0	1	3			e	7	7	ML_new
P01	0 immédiat	meaningless106	meanigless	meanigless	New	meaningless	0	r	s	r	52	296	52	Image1216		New	0	1	4			r	8	8	ML_new
P01	0 immédiat	meaningless121	meanigless	meanigless	New	meaningless	0	r	l	r	164	295	164	Image1217		New	1	0	4	r	1			1	ML_new
P01	0 immédiat	meaningless139	meanigless	meanigless	New	meaningless	0	z	l	z	428	787	428	Image1218		New	1	0	2	z	3			3	ML_new
P01	0 immédiat	meaningless142	meanigless	meanigless	New	meaningless	0	r	s	r	500	263	500	Image1232		New	0	1	4			r	8	8	ML_new
P01	0 immédiat	meaningless157	meanigless	meanigless	New	meaningless	0	e	s	e	132	61	132	Image1234		New	0	1	3			e	7	7	ML_new
P01	0 immédiat	meaningless086	meanigless	meanigless	New	meaningless	0	e	l	e	260	343	260	Image1245		New	1	0	3	e	2			2	ML_new
P01	0 immédiat	meaningless104	meanigless	meanigless	New	meaningless	0	r	s	r	1924	1298	1924	Image1246		New	0	1	4			r	8	8	ML_new
P01	0 immédiat	meaningless122	meanigless	meanigless	New	meaningless	0	e	s	e	196	314	196	Image1247		New	0	1	3			e	7	7	ML_new
P01	0 immédiat	meaningless140	meanigless	meanigless	New	meaningless	0	e	s	e	236	379	236	Image1250		New	0	1	3			e	7	7	ML_new
P01	0 immédiat	meaningless158	meanigless	meanigless	New	meaningless	0	r	s	r	340	1037	340	Image1273		New	0	1	4			r	8	8	ML_new
P01	0 immédiat	meaningless089	meanigless	meanigless	New	meaningless	0	e	s	e	244	428	244	R17		New	0	1	3			e	7	7	ML_new
P01	0 immédiat	meaningless107	meanigless	meanigless	New	meaningless	0	e	s	e	436	101	436	R18		New	0	1	3			e	7	7	ML_new
P01	0 immédiat	meaningless125	meanigless	meanigless	New	meaningless	0	z	l	z	3595	1975	3595	R19		New	1	0	2	z	3			3	ML_new
P01	0 immédiat	meaningless143	meanigless	meanigless	New	meaningless	0	e	l	e	1324	380	1324	R20		New	1	0	3	e	2			2	ML_new
P01	0 immédiat	meaningless090	meanigless	meanigless	New	meaningless	0	r	s	r	901	378	901	R5		New	0	1	4			r	8	8	ML_new
P01	0 immédiat	meaningless108	meanigless	meanigless	New	meaningless	0	z	s	z	460	2114	460	R6		New	0	1	2			z	6	6	ML_new
P01	0 immédiat	meaningless126	meanigless	meanigless	New	meaningless	0	z	s	z	260	349	260	R7		New	0	1	2			z	6	6	ML_new
P01	0 immédiat	meaningless144	meanigless	meanigless	New	meaningless	0	z	s	z	900	1132	900	R8		New	0	1	2			z	6	6	ML_new
P01	0 immédiat	meaningless177	meanigless	meanigless	Old	meaningless	1	e	s	e	972	134	972	Image0070	120	Old	0	1	3			e	7	7	ML_old_120_1
P01	0 immédiat	meaningless209	meanigless	meanigless	Old	meaningless	1	r	l	r	708	984	708	Image0071	120	Old	1	0	4	r	1			1	ML_old_120_1
P01	0 immédiat	meaningless161	meanigless	meanigless	Old	meaningless	1	r	s	r	820	2206	820	Image0128	120	Old	0	1	4			r	8	8	ML_old_120_1
P01	0 immédiat	meaningless225	meanigless	meanigless	Old	meaningless	1	e	l	e	76	3299	76	Image0132	120	Old	1	0	3	e	2			2	ML_old_120_1
P01	0 immédiat	meaningless193	meanigless	meanigless	Old	meaningless	1	e	l	e	108	369	108	Image0178	120	Old	1	0	3	e	2			2	ML_old_120_1
P01	0 immédiat	meaningless181	meanigless	meanigless	Old	meaningless	1	r	l	r	164	436	164	Image0344	120	Old	1	0	4	r	1			1	ML_old_120_1
P01	0 immédiat	meaningless213	meanigless	meanigless	Old	meaningless	1	e	s	e	699	556	699	Image0348	120	Old	0	1	3			e	7	7	ML_old_120_1
P01	0 immédiat	meaningless173	meanigless	meanigless	Old	meaningless	1	r	s	r	308	584	308	Image0425	120	Old	0	1	4			r	8	8	ML_old_120_1
P01	0 immédiat	meaningless237	meanigless	meanigless	Old	meaningless	1	e	l	e	116	426	116	Image0427	120	Old	1	0	3	e	2			2	ML_old_120_1
P01	0 immédiat	meaningless165	meanigless	meanigless	Old	meaningless	1	r	s	r	212	265	212	Image0461	120	Old	0	1	4			r	8	8	ML_old_120_1
P01	0 immédiat	meaningless229	meanigless	meanigless	Old	meaningless	1	r	l	r	132	290	132	Image0465	120	Old	1	0	4	r	1			1	ML_old_120_1
P01	0 immédiat	meaningless206	meanigless	meanigless	Old	meaningless	1	r	s	r	180	1406	180	Image0477	120	Old	0	1	4			r	8	8	ML_old_120_1
P01	0 immédiat	meaningless197	meanigless	meanigless	Old	meaningless	1	r	l	r	108	437	108	Image0501	120	Old	1	0	4	r	1			1	ML_old_120_1
P01	0 immédiat	meaningless185	meanigless	meanigless	Old	meaningless	1	e	l	e	100	450	100	Image0665	120	Old	1	0	3	e	2			2	ML_old_120_1
P01	0 immédiat	meaningless217	meanigless	meanigless	Old	meaningless	1	e	s	e	212	381	212	Image0666	120	Old	0	1	3			e	7	7	ML_old_120_1
P01	0 immédiat	meaningless169	meanigless	meanigless	Old	meaningless	1	e	l	e	988	429	988	Image0676	120	Old	1	0	3	e	2			2	ML_old_120_1
P01	0 immédiat	meaningless233	meanigless	meanigless	Old	meaningless	1	e	s	e	204	308	204	Image0785	120	Old	0	1	3			e	7	7	ML_old_120_1
P01	0 immédiat	meaningless202	meanigless	meanigless	Old	meaningless	1	r	s	r	548	380	548	Image1104	120	Old	0	1	4			r	8	8	ML_old_120_1
P01	0 immédiat	meaningless189	meanigless	meanigless	Old	meaningless	1	e	l	e	92	334	92	Image1235	120	Old	1	0	3	e	2			2	ML_old_120_1
P01	0 immédiat	meaningless221	meanigless	meanigless	Old	meaningless	1	e	l	e	228	571	228	Image1236	120	Old	1	0	3	e	2			2	ML_old_120_1
P01	0 immédiat	meaningless191	meanigless	meanigless	Old	meaningless	2	r	l	r	20	288	20	Image0017	120	Old	1	0	4	r	1			1	ML_old_120_2
P01	0 immédiat	meaningless223	meanigless	meanigless	Old	meaningless	2	e	l	e	220	716	220	Image0018	120	Old	1	0	3	e	2			2	ML_old_120_2
P01	0 immédiat	meaningless179	meanigless	meanigless	Old	meaningless	2	e	l	e	1307	1421	1307	Image0157	120	Old	1	0	3	e	2			2	ML_old_120_2
P01	0 immédiat	meaningless211	meanigless	meanigless	Old	meaningless	2	r	s	r	508	318	508	Image0162	120	Old	0	1	4			r	8	8	ML_old_120_2
P01	0 immédiat	meaningless163	meanigless	meanigless	Old	meaningless	2	r	l	r	109	395	109	Image0242	120	Old	1	0	4	r	1			1	ML_old_120_2
P01	0 immédiat	meaningless227	meanigless	meanigless	Old	meaningless	2	e	s	e	364	2591	364	Image0246	120	Old	0	1	3			e	7	7	ML_old_120_2
P01	0 immédiat	meaningless195	meanigless	meanigless	Old	meaningless	2	r	s	r	196	373	196	Image0412	120	Old	0	1	4			r	8	8	ML_old_120_2
P01	0 immédiat	meaningless183	meanigless	meanigless	Old	meaningless	2	e	l	e	260	1035	260	Image0610	120	Old	1	0	3	e	2			2	ML_old_120_2
P01	0 immédiat	meaningless215	meanigless	meanigless	Old	meaningless	2	z	l	z	508	606	508	Image0611	120	Old	1	0	2	z	3			3	ML_old_120_2
P01	0 immédiat	meaningless167	meanigless	meanigless	Old	meaningless	2	r	l	r	117	458	117	Image0621	120	Old	1	0	4	r	1			1	ML_old_120_2
P01	0 immédiat	meaningless231	meanigless	meanigless	Old	meaningless	2	z	l	z	115	444	115	Image0623	120	Old	1	0	2	z	3			3	ML_old_120_2
P01	0 immédiat	meaningless199	meanigless	meanigless	Old	meaningless	2	z	l	z	187	253	187	Image0651	120	Old	1	0	2	z	3			3	ML_old_120_2
P01	0 immédiat	meaningless187	meanigless	meanigless	Old	meaningless	2	r	s	r	156	380	156	Image0897	120	Old	0	1	4			r	8	8	ML_old_120_2
P01	0 immédiat	meaningless219	meanigless	meanigless	Old	meaningless	2	r	l	r	580	693	580	Image0916	120	Old	1	0	4	r	1			1	ML_old_120_2
P01	0 immédiat	meaningless171	meanigless	meanigless	Old	meaningless	2	e	s	e	244	598	244	Image1103	120	Old	0	1	3			e	7	7	ML_old_120_2
P01	0 immédiat	meaningless235	meanigless	meanigless	Old	meaningless	2	r	l	r	108	434	108	Image1222	120	Old	1	0	4	r	1			1	ML_old_120_2
P01	0 immédiat	meaningless204	meanigless	meanigless	Old	meaningless	2	e	l	e	276	408	276	Image1253	120	Old	1	0	3	e	2			2	ML_old_120_2
P01	0 immédiat	meaningless175	meanigless	meanigless	Old	meaningless	2	r	s	r	92	458	92	R10	120	Old	0	1	4			r	8	8	ML_old_120_2
P01	0 immédiat	meaningless239	meanigless	meanigless	Old	meaningless	2	r	s	r	324	823	324	R12	120	Old	0	1	4			r	8	8	ML_old_120_2
P01	0 immédiat	meaningless208	meanigless	meanigless	Old	meaningless	2	e	s	e	276	424	276	R23	120	Old	0	1	3			e	7	7	ML_old_120_2
P01	0 immédiat	meaningless178	meanigless	meanigless	Old	meaningless	1	e	l	e	252	1834	252	Image0107	1920	Old	1	0	3	e	2			2	ML_old_1920_1
P01	0 immédiat	meaningless210	meanigless	meanigless	Old	meaningless	1	r	l	r	84	479	84	Image0108	1920	Old	1	0	4	r	1			1	ML_old_1920_1
P01	0 immédiat	meaningless205	meanigless	meanigless	Old	meaningless	1	r	l	r	91	313	91	Image0129	1920	Old	1	0	4	r	1			1	ML_old_1920_1
P01	0 immédiat	meaningless162	meanigless	meanigless	Old	meaningless	1	r	l	r	99	286	99	Image0176	1920	Old	1	0	4	r	1			1	ML_old_1920_1
P01	0 immédiat	meaningless226	meanigless	meanigless	Old	meaningless	1	e	s	e	164	296	164	Image0179	1920	Old	0	1	3			e	7	7	ML_old_1920_1
P01	0 immédiat	meaningless194	meanigless	meanigless	Old	meaningless	1	r	l	r	196	428	196	Image0243	1920	Old	1	0	4	r	1			1	ML_old_1920_1
P01	0 immédiat	meaningless182	meanigless	meanigless	Old	meaningless	1	r	l	r	108	294	108	Image0426	1920	Old	1	0	4	r	1			1	ML_old_1920_1
P01	0 immédiat	meaningless214	meanigless	meanigless	Old	meaningless	1	r	l	r	260	316	260	Image0478	1920	Old	1	0	4	r	1			1	ML_old_1920_1
P01	0 immédiat	meaningless166	meanigless	meanigless	Old	meaningless	1	r	l	r	196	411	196	Image0494	1920	Old	1	0	4	r	1			1	ML_old_1920_1
P01	0 immédiat	meaningless230	meanigless	meanigless	Old	meaningless	1	e	l	e	436	296	436	Image0542	1920	Old	1	0	3	e	2			2	ML_old_1920_1
P01	0 immédiat	meaningless198	meanigless	meanigless	Old	meaningless	1	z	l	z	452	2316	452	Image0622	1920	Old	1	0	2	z	3			3	ML_old_1920_1
P01	0 immédiat	meaningless238	meanigless	meanigless	Old	meaningless	1	e	l	e	108	1541	108	Image0680	1920	Old	1	0	3	e	2			2	ML_old_1920_1
P01	0 immédiat	meaningless186	meanigless	meanigless	Old	meaningless	1	r	l	r	244	454	244	Image0692	1920	Old	1	0	4	r	1			1	ML_old_1920_1
P01	0 immédiat	meaningless218	meanigless	meanigless	Old	meaningless	1	r	s	r	108	487	108	Image0693	1920	Old	0	1	4			r	8	8	ML_old_1920_1
P01	0 immédiat	meaningless170	meanigless	meanigless	Old	meaningless	1	r	l	r	100	250	100	Image0760	1920	Old	1	0	4	r	1			1	ML_old_1920_1
P01	0 immédiat	meaningless201	meanigless	meanigless	Old	meaningless	1	r	l	r	1404	1636	1404	Image0764	1920	Old	1	0	4	r	1			1	ML_old_1920_1
P01	0 immédiat	meaningless234	meanigless	meanigless	Old	meaningless	1	r	l	r	461	16	461	Image1105	1920	Old	1	0	4	r	1			1	ML_old_1920_1
P01	0 immédiat	meaningless174	meanigless	meanigless	Old	meaningless	1	r	s	r	348	322	348	Image1252	1920	Old	0	1	4			r	8	8	ML_old_1920_1
P01	0 immédiat	meaningless190	meanigless	meanigless	Old	meaningless	1	z	l	z	116	1775	116	Image1274	1920	Old	1	0	2	z	3			3	ML_old_1920_1
P01	0 immédiat	meaningless222	meanigless	meanigless	Old	meaningless	1	e	s	e	300	605	300	Image1277	1920	Old	0	1	3			e	7	7	ML_old_1920_1
P01	0 immédiat	meaningless192	meanigless	meanigless	Old	meaningless	2	r	l	r	100	401	100	Image0090	1920	Old	1	0	4	r	1			1	ML_old_1920_2
P01	0 immédiat	meaningless224	meanigless	meanigless	Old	meaningless	2	r	l	r	437	557	437	Image0091	1920	Old	1	0	4	r	1			1	ML_old_1920_2
P01	0 immédiat	meaningless180	meanigless	meanigless	Old	meaningless	2	r	l	r	388	290	388	Image0215	1920	Old	1	0	4	r	1			1	ML_old_1920_2
P01	0 immédiat	meaningless212	meanigless	meanigless	Old	meaningless	2	r	l	r	196	534	196	Image0220	1920	Old	1	0	4	r	1			1	ML_old_1920_2
P01	0 immédiat	meaningless164	meanigless	meanigless	Old	meaningless	2	r	l	r	100	518	100	Image0411	1920	Old	1	0	4	r	1			1	ML_old_1920_2
P01	0 immédiat	meaningless228	meanigless	meanigless	Old	meaningless	2	r	l	r	116	319	116	Image0413	1920	Old	1	0	4	r	1			1	ML_old_1920_2
P01	0 immédiat	meaningless196	meanigless	meanigless	Old	meaningless	2	r	l	r	140	413	140	Image0462	1920	Old	1	0	4	r	1			1	ML_old_1920_2
P01	0 immédiat	meaningless184	meanigless	meanigless	Old	meaningless	2	e	l	e	316	95	316	Image0636	1920	Old	1	0	3	e	2			2	ML_old_1920_2
P01	0 immédiat	meaningless216	meanigless	meanigless	Old	meaningless	2	r	l	r	116	356	116	Image0637	1920	Old	1	0	4	r	1			1	ML_old_1920_2
P01	0 immédiat	meaningless168	meanigless	meanigless	Old	meaningless	2	r	l	r	188	606	188	Image0649	1920	Old	1	0	4	r	1			1	ML_old_1920_2
P01	0 immédiat	meaningless232	meanigless	meanigless	Old	meaningless	2	z	l	z	348	1629	348	Image0652	1920	Old	1	0	2	z	3			3	ML_old_1920_2
P01	0 immédiat	meaningless200	meanigless	meanigless	Old	meaningless	2	r	l	r	140	120	140	Image0677	1920	Old	1	0	4	r	1			1	ML_old_1920_2
P01	0 immédiat	meaningless188	meanigless	meanigless	Old	meaningless	2	r	l	r	92	400	92	Image1208	1920	Old	1	0	4	r	1			1	ML_old_1920_2
P01	0 immédiat	meaningless220	meanigless	meanigless	Old	meaningless	2	r	l	r	260	431	260	Image1209	1920	Old	1	0	4	r	1			1	ML_old_1920_2
P01	0 immédiat	meaningless172	meanigless	meanigless	Old	meaningless	2	r	l	r	428	133	428	Image1220	1920	Old	1	0	4	r	1			1	ML_old_1920_2
P01	0 immédiat	meaningless203	meanigless	meanigless	Old	meaningless	2	e	l	e	1444	511	1444	Image1221	1920	Old	1	0	3	e	2			2	ML_old_1920_2
P01	0 immédiat	meaningless236	meanigless	meanigless	Old	meaningless	2	r	l	r	132	283	132	Image1254	1920	Old	1	0	4	r	1			1	ML_old_1920_2
P01	0 immédiat	meaningless207	meanigless	meanigless	Old	meaningless	2	r	l	r	132	342	132	R11	1920	Old	1	0	4	r	1			1	ML_old_1920_2
P01	0 immédiat	meaningless176	meanigless	meanigless	Old	meaningless	2	r	l	r	388	454	388	R22	1920	Old	1	0	4	r	1			1	ML_old_1920_2
P01	0 immédiat	meaningless240	meanigless	meanigless	Old	meaningless	2	r	l	r	180	392	180	R24	1920	Old	1	0	4	r	1			1	ML_old_1920_2
P02	0 immédiat	animal5	papillon	animal	Old	meaningfull	1	r	s	r	343	377	343	gist005_1	120	Old	0	1	4			r	8	8	MF_old_120_1
P02	0 immédiat	animal17	dauphin	animal	Old	meaningfull	1	z	s	z	518	671	518	gist017_2	120	Old	0	1	2			z	6	6	MF_old_120_1
P02	0 immédiat	animal26	ours	animal	Old	meaningfull	1	r	s	r	597	645	597	gist026_2	120	Old	0	1	4			r	8	8	MF_old_120_1
P02	0 immédiat	animal35	tigre	animal	Old	meaningfull	1	z	l	z	1786	6331	1786	gist035_2	120	Old	1	0	2	z	3			3	MF_old_120_1
P02	0 immédiat	animal42	giraffe	animal	Old	meaningfull	1	z	l	z	806	545	806	gist042_3	120	Old	1	0	2	z	3			3	MF_old_120_1
P02	0 immédiat	animal52	bouc	animal	Old	meaningfull	1	r	l	r	649	2601	649	gist052_2	120	Old	1	0	4	r	1			1	MF_old_120_1
P02	0 immédiat	animal60	panthÃ¨re noire	animal	Old	meaningfull	1	e	s	e	1263	1836	1263	gist060_2	120	Old	0	1	3			e	7	7	MF_old_120_1
P02	0 immédiat	animal79	cigogne	animal	Old	meaningfull	1	r	s	r	382	2233	382	gist079_1	120	Old	0	1	4			r	8	8	MF_old_120_1
P02	0 immédiat	paysage7	foret	paysage	Old	meaningfull	1	r	s	r	214	468	214	gist107_1	120	Old	0	1	4			r	8	8	MF_old_120_1
P02	0 immédiat	paysage19	champ	paysage	Old	meaningfull	1	r	s	r	1671	1394	1671	gist119_1	120	Old	0	1	4			r	8	8	MF_old_120_1
P02	0 immédiat	paysage25	route	paysage	Old	meaningfull	1	e	s	e	1190	652	1190	gist125_4	120	Old	0	1	3			e	7	7	MF_old_120_1
P02	0 immédiat	objet isole5	eponde	objet isole	Old	meaningfull	1	r	s	r	285	426	285	gist155_1	120	Old	0	1	4			r	8	8	MF_old_120_1
P02	0 immédiat	objet isole13	ciseau	objet isole	Old	meaningfull	1	e	l	e	286	428	286	gist162_1	120	Old	1	0	3	e	2			2	MF_old_120_1
P02	0 immédiat	objet isole23	des	objet isole	Old	meaningfull	1	r	s	r	216	395	216	gist172_1	120	Old	0	1	4			r	8	8	MF_old_120_1
P02	0 immédiat	objet isole31	spatule	objet isole	Old	meaningfull	1	e	s	e	244	373	244	gist180_1	120	Old	0	1	3			e	7	7	MF_old_120_1
P02	0 immédiat	fuit/legumes isoles9	pasteque	fruits/legumes	Old	meaningfull	1	e	l	e	356	530	356	gist409_1	120	Old	1	0	3	e	2			2	MF_old_120_1
P02	0 immédiat	fuit/legumes isoles30	choux	fruits/legumes	Old	meaningfull	1	r	l	r	366	422	366	gist430_2	120	Old	1	0	4	r	1			1	MF_old_120_1
P02	0 immédiat	fuit/legumes isoles36	paplemousse	fruits/legumes	Old	meaningfull	1	r	l	r	779	1829	779	gist436_2	120	Old	1	0	4	r	1			1	MF_old_120_1
P02	0 immédiat	fuit/legumes isoles45	haricot	fruits/legumes	Old	meaningfull	1	None	l	None	10000	4029	10000	gist446_2	120	Old	1	0	Non3	None	Non2			Non2	MF_old_120_1
P02	0 immédiat	fuit/legumes isoles56	poivron	fruits/legumes	Old	meaningfull	1	z	l	z	1143	1472	1143	gist457_1	120	Old	1	0	2	z	3			3	MF_old_120_1
P02	0 immédiat	animal8	tortue	animal	Old	meaningfull	2	z	l	z	660	4909	660	gist008_1	120	Old	1	0	2	z	3			3	MF_old_120_2
P02	0 immédiat	animal21	rinoceroce	animal	Old	meaningfull	2	e	l	e	439	4422	439	gist021_1	120	Old	1	0	3	e	2			2	MF_old_120_2
P02	0 immédiat	animal31	loup	animal	Old	meaningfull	2	r	l	r	3538	2112	3538	gist031_1	120	Old	1	0	4	r	1			1	MF_old_120_2
P02	0 immédiat	animal40	cerf	animal	Old	meaningfull	2	z	l	z	891	874	891	gist040_2	120	Old	1	0	2	z	3			3	MF_old_120_2
P02	0 immédiat	animal45	kangourou	animal	Old	meaningfull	2	r	l	r	363	528	363	gist045_1	120	Old	1	0	4	r	1			1	MF_old_120_2
P02	0 immédiat	animal54	mouton	animal	Old	meaningfull	2	e	s	e	593	621	593	gist054_1	120	Old	0	1	3			e	7	7	MF_old_120_2
P02	0 immédiat	animal67	pinguin	animal	Old	meaningfull	2	z	l	z	2100	695	2100	gist067_1	120	Old	1	0	2	z	3			3	MF_old_120_2
P02	0 immédiat	paysage2	plage	paysage	Old	meaningfull	2	e	l	e	740	621	740	gist102_1	120	Old	1	0	3	e	2			2	MF_old_120_2
P02	0 immédiat	paysage13	desert:steppe	paysage	Old	meaningfull	2	e	s	e	1459	1411	1459	gist113_2	120	Old	0	1	3			e	7	7	MF_old_120_2
P02	0 immédiat	paysage25	route	paysage	Old	meaningfull	2	r	l	r	294	340	294	gist125_1	120	Old	1	0	4	r	1			1	MF_old_120_2
P02	0 immédiat	objet isole3	brosse Ã dent	objet isole	Old	meaningfull	2	z	s	z	2093	633	2093	gist153_1	120	Old	0	1	2			z	6	6	MF_old_120_2
P02	0 immédiat	objet isole11	toune_visse	objet isole	Old	meaningfull	2	r	l	r	1279	2035	1279	gist160_1	120	Old	1	0	4	r	1			1	MF_old_120_2
P02	0 immédiat	objet isole16	couverts	objet isole	Old	meaningfull	2	r	l	r	301	392	301	gist165_1	120	Old	1	0	4	r	1			1	MF_old_120_2
P02	0 immédiat	objet isole26	scie	objet isole	Old	meaningfull	2	e	s	e	291	512	291	gist175_1	120	Old	0	1	3			e	7	7	MF_old_120_2
P02	0 immédiat	fuit/legumes isoles3	orange	fruits/legumes	Old	meaningfull	2	r	l	r	333	1169	333	gist403_2	120	Old	1	0	4	r	1			1	MF_old_120_2
P02	0 immédiat	fuit/legumes isoles19	tomate	fruits/legumes	Old	meaningfull	2	r	l	r	1583	1021	1583	gist419_1	120	Old	1	0	4	r	1			1	MF_old_120_2
P02	0 immédiat	fuit/legumes isoles33	myrtille	fruits/legumes	Old	meaningfull	2	e	s	e	253	392	253	gist433_2	120	Old	0	1	3			e	7	7	MF_old_120_2
P02	0 immédiat	fuit/legumes isoles40	jambon	fruits/legumes	Old	meaningfull	2	e	s	e	386	545	386	gist440_2	120	Old	0	1	3			e	7	7	MF_old_120_2
P02	0 immédiat	fuit/legumes isoles51	blette	fruits/legumes	Old	meaningfull	2	z	s	z	740	1504	740	gist451_2	120	Old	0	1	2			z	6	6	MF_old_120_2
P02	0 immédiat	fuit/legumes isoles59	radis	fruits/legumes	Old	meaningfull	2	r	l	r	728	1618	728	gist461_1	120	Old	1	0	4	r	1			1	MF_old_120_2
P02	0 immédiat	animal6	grenouille	animal	Old	meaningfull	1	e	s	e	274	646	274	gist006_1	1920	Old	0	1	3			e	7	7	MF_old_1920_1
P02	0 immédiat	animal18	ours polaire	animal	Old	meaningfull	1	e	s	e	538	1811	538	gist018_2	1920	Old	0	1	3			e	7	7	MF_old_1920_1
P02	0 immédiat	animal30	chien	animal	Old	meaningfull	1	r	l	r	304	371	304	gist030_1	1920	Old	1	0	4	r	1			1	MF_old_1920_1
P02	0 immédiat	animal38	zebre	animal	Old	meaningfull	1	e	l	e	394	480	394	gist038_1	1920	Old	1	0	3	e	2			2	MF_old_1920_1
P02	0 immédiat	animal44	vache	animal	Old	meaningfull	1	r	l	r	314	658	314	gist044_2	1920	Old	1	0	4	r	1			1	MF_old_1920_1
P02	0 immédiat	animal53	bison	animal	Old	meaningfull	1	r	l	r	302	2061	302	gist053_1	1920	Old	1	0	4	r	1			1	MF_old_1920_1
P02	0 immédiat	animal62	ane	animal	Old	meaningfull	1	z	s	z	1975	3581	1975	gist062_1	1920	Old	0	1	2			z	6	6	MF_old_1920_1
P02	0 immédiat	animal80	coq	animal	Old	meaningfull	1	r	s	r	536	493	536	gist080_1	1920	Old	0	1	4			r	8	8	MF_old_1920_1
P02	0 immédiat	paysage11	montagne	paysage	Old	meaningfull	1	z	s	z	1307	3564	1307	gist111_1	1920	Old	0	1	2			z	6	6	MF_old_1920_1
P02	0 immédiat	paysage20	champ	paysage	Old	meaningfull	1	a	l	a	599	2019	599	gist120_1	1920	Old	1	0	1	a	4			4	MF_old_1920_1
P02	0 immédiat	paysage25	route	paysage	Old	meaningfull	1	r	s	r	312	427	312	gist125_2	1920	Old	0	1	4			r	8	8	MF_old_1920_1
P02	0 immédiat	objet isole4	peigne	objet isole	Old	meaningfull	1	r	s	r	243	377	243	gist154_1	1920	Old	0	1	4			r	8	8	MF_old_1920_1
P02	0 immédiat	objet isole14	pince Ã linge	objet isole	Old	meaningfull	1	r	l	r	617	573	617	gist163_1	1920	Old	1	0	4	r	1			1	MF_old_1920_1
P02	0 immédiat	objet isole24	pince	objet isole	Old	meaningfull	1	e	l	e	356	1482	356	gist173_1	1920	Old	1	0	3	e	2			2	MF_old_1920_1
P02	0 immédiat	fuit/legumes isoles1	pomme	fruits/legumes	Old	meaningfull	1	e	l	e	750	739	750	gist401_1	1920	Old	1	0	3	e	2			2	MF_old_1920_1
P02	0 immédiat	fuit/legumes isoles18	champignion	fruits/legumes	Old	meaningfull	1	r	l	r	543	1497	543	gist418_2	1920	Old	1	0	4	r	1			1	MF_old_1920_1
P02	0 immédiat	fuit/legumes isoles32	cacahouette	fruits/legumes	Old	meaningfull	1	e	l	e	449	1159	449	gist432_2	1920	Old	1	0	3	e	2			2	MF_old_1920_1
P02	0 immédiat	fuit/legumes isoles39	poulet	fruits/legumes	Old	meaningfull	1	r	s	r	597	612	597	gist439_2	1920	Old	0	1	4			r	8	8	MF_old_1920_1
P02	0 immédiat	fuit/legumes isoles47	avocat	fruits/legumes	Old	meaningfull	1	r	l	r	404	1323	404	gist448_1	1920	Old	1	0	4	r	1			1	MF_old_1920_1
P02	0 immédiat	fuit/legumes isoles58	croissant	fruits/legumes	Old	meaningfull	1	e	l	e	585	716	585	gist460_1	1920	Old	1	0	3	e	2			2	MF_old_1920_1
P02	0 immédiat	animal13	chenille	animal	Old	meaningfull	2	r	l	r	639	520	639	gist013_2	1920	Old	1	0	4	r	1			1	MF_old_1920_2
P02	0 immédiat	animal22	elephant	animal	Old	meaningfull	2	z	l	z	3490	7823	3490	gist022_2	1920	Old	1	0	2	z	3			3	MF_old_1920_2
P02	0 immédiat	animal33	panthÃ¨re	animal	Old	meaningfull	2	e	s	e	3808	2274	3808	gist033_1	1920	Old	0	1	3			e	7	7	MF_old_1920_2
P02	0 immédiat	animal41	oxyx	animal	Old	meaningfull	2	z	l	z	753	1577	753	gist041_2	1920	Old	1	0	2	z	3			3	MF_old_1920_2
P02	0 immédiat	animal48	ecureuil	animal	Old	meaningfull	2	r	l	r	393	509	393	gist048_1	1920	Old	1	0	4	r	1			1	MF_old_1920_2
P02	0 immédiat	animal56	gorille	animal	Old	meaningfull	2	r	l	r	312	848	312	gist056_1	1920	Old	1	0	4	r	1			1	MF_old_1920_2
P02	0 immédiat	animal77	flaman rose	animal	Old	meaningfull	2	r	l	r	829	896	829	gist077_1	1920	Old	1	0	4	r	1			1	MF_old_1920_2
P02	0 immédiat	paysage4	rocher	paysage	Old	meaningfull	2	e	s	e	3346	28	3346	gist104_2	1920	Old	0	1	3			e	7	7	MF_old_1920_2
P02	0 immédiat	paysage16	champ de fleur	paysage	Old	meaningfull	2	r	l	r	455	462	455	gist116_1	1920	Old	1	0	4	r	1			1	MF_old_1920_2
P02	0 immédiat	paysage25	route	paysage	Old	meaningfull	2	e	l	e	912	1542	912	gist125_10	1920	Old	1	0	3	e	2			2	MF_old_1920_2
P02	0 immédiat	paysage25	route	paysage	Old	meaningfull	2	r	l	r	321	486	321	gist125_8	1920	Old	1	0	4	r	1			1	MF_old_1920_2
P02	0 immédiat	objet isole8	epingles nourisse	objet isole	Old	meaningfull	2	r	l	r	323	475	323	gist157_2	1920	Old	1	0	4	r	1			1	MF_old_1920_2
P02	0 immédiat	objet isole22	raquette	objet isole	Old	meaningfull	2	r	l	r	841	674	841	gist171_1	1920	Old	1	0	4	r	1			1	MF_old_1920_2
P02	0 immédiat	objet isole28	cle	objet isole	Old	meaningfull	2	r	l	r	900	664	900	gist177_1	1920	Old	1	0	4	r	1			1	MF_old_1920_2
P02	0 immédiat	fuit/legumes isoles5	raisin	fruits/legumes	Old	meaningfull	2	r	l	r	322	312	322	gist405_1	1920	Old	1	0	4	r	1			1	MF_old_1920_2
P02	0 immédiat	fuit/legumes isoles28	cookies	fruits/legumes	Old	meaningfull	2	r	l	r	687	737	687	gist428_2	1920	Old	1	0	4	r	1			1	MF_old_1920_2
P02	0 immédiat	fuit/legumes isoles34	mur	fruits/legumes	Old	meaningfull	2	r	l	r	285	345	285	gist434_2	1920	Old	1	0	4	r	1			1	MF_old_1920_2
P02	0 immédiat	fuit/legumes isoles43	cafe	fruits/legumes	Old	meaningfull	2	r	l	r	304	539	304	gist443_2	1920	Old	1	0	4	r	1			1	MF_old_1920_2
P02	0 immédiat	fuit/legumes isoles52	datte	fruits/legumes	Old	meaningfull	2	r	l	r	427	1162	427	gist452_3	1920	Old	1	0	4	r	1			1	MF_old_1920_2
P02	0 immédiat	fuit/legumes isoles60	carotte	fruits/legumes	Old	meaningfull	2	r	l	r	1001	1838	1001	gist462_1	1920	Old	1	0	4	r	1			1	MF_old_1920_2
P02	0 immédiat	animal1	escargot	animal	New-oldGist	meaningfull	1	r	s	r	290	362	290	gist001_2	120	R-gist	0	1	4			r	8	8	MF_N_oldGist_120_1
P02	0 immédiat	animal16	phoque	animal	New-oldGist	meaningfull	1	r	s	r	446	451	446	gist016_2	120	R-gist	0	1	4			r	8	8	MF_N_oldGist_120_1
P02	0 immédiat	animal68	cygne	animal	New-oldGist	meaningfull	1	e	l	e	608	1831	608	gist068_2	120	R-gist	1	0	3	e	2			2	MF_N_oldGist_120_1
P02	0 immédiat	paysage1	ciel	paysage	New-oldGist	meaningfull	1	e	s	e	1793	923	1793	gist101_2	120	R-gist	0	1	3			e	7	7	MF_N_oldGist_120_1
P02	0 immédiat	paysage17	banquise	paysage	New-oldGist	meaningfull	1	r	s	r	2000	704	2000	gist117_1	120	R-gist	0	1	4			r	8	8	MF_N_oldGist_120_1
P02	0 immédiat	paysage27	fougÃ¨re	paysage	New-oldGist	meaningfull	1	r	s	r	680	1063	680	gist127_2	120	R-gist	0	1	4			r	8	8	MF_N_oldGist_120_1
P02	0 immédiat	objet isole2	brosse	objet isole	New-oldGist	meaningfull	1	z	s	z	355	508	355	gist152_2	120	R-gist	0	1	2			z	6	6	MF_N_oldGist_120_1
P02	0 immédiat	fuit/legumes isoles2	poire	fruits/legumes	New-oldGist	meaningfull	1	r	l	r	2758	979	2758	gist402_1	120	R-gist	1	0	4	r	1			1	MF_N_oldGist_120_1
P02	0 immédiat	fuit/legumes isoles26	fromage	fruits/legumes	New-oldGist	meaningfull	1	r	s	r	827	1935	827	gist426_2	120	R-gist	0	1	4			r	8	8	MF_N_oldGist_120_1
P02	0 immédiat	fuit/legumes isoles42	steak	fruits/legumes	New-oldGist	meaningfull	1	r	s	r	637	460	637	gist442_2	120	R-gist	0	1	4			r	8	8	MF_N_oldGist_120_1
P02	0 immédiat	animal4	champigon	animal	New-oldGist	meaningfull	2	e	s	e	397	588	397	gist004_1	120	R-gist	0	1	3			e	7	7	MF_N_oldGist_120_2
P02	0 immédiat	animal43	chameau	animal	New-oldGist	meaningfull	2	z	s	z	417	2738	417	gist043_2	120	R-gist	0	1	2			z	6	6	MF_N_oldGist_120_2
P02	0 immédiat	animal76	paon	animal	New-oldGist	meaningfull	2	e	l	e	272	387	272	gist076_2	120	R-gist	1	0	3	e	2			2	MF_N_oldGist_120_2
P02	0 immédiat	paysage9	montagne eneige	paysage	New-oldGist	meaningfull	2	e	s	e	781	1454	781	gist109_2	120	R-gist	0	1	3			e	7	7	MF_N_oldGist_120_2
P02	0 immédiat	paysage25	route	paysage	New-oldGist	meaningfull	2	z	s	z	873	1360	873	gist125_6	120	R-gist	0	1	2			z	6	6	MF_N_oldGist_120_2
P02	0 immédiat	paysage30	grotte	paysage	New-oldGist	meaningfull	2	e	s	e	5252	2794	5252	gist130_2	120	R-gist	0	1	3			e	7	7	MF_N_oldGist_120_2
P02	0 immédiat	objet isole12	pinceau	objet isole	New-oldGist	meaningfull	2	e	s	e	969	1934	969	gist161_2	120	R-gist	0	1	3			e	7	7	MF_N_oldGist_120_2
P02	0 immédiat	fuit/legumes isoles6	noix de coco	fruits/legumes	New-oldGist	meaningfull	2	a	s	a	326	559	326	gist406_1	120	R-gist	0	1	1			a	5	5	MF_N_oldGist_120_2
P02	0 immédiat	fuit/legumes isoles37	pÃªche	fruits/legumes	New-oldGist	meaningfull	2	a	s	a	559	1028	559	gist437_3	120	R-gist	0	1	1			a	5	5	MF_N_oldGist_120_2
P02	0 immédiat	fuit/legumes isoles49	kaki	fruits/legumes	New-oldGist	meaningfull	2	z	l	z	359	533	359	gist449_2	120	R-gist	1	0	2	z	3			3	MF_N_oldGist_120_2
P02	0 immédiat	animal3	sauterelle	animal	New-oldGist	meaningfull	1	r	s	r	291	424	291	gist003_1	1920	R-gist	0	1	4			r	8	8	MF_N_oldGist_1920_1
P02	0 immédiat	animal39	cheval	animal	New-oldGist	meaningfull	1	e	s	e	427	450	427	gist039_1	1920	R-gist	0	1	3			e	7	7	MF_N_oldGist_1920_1
P02	0 immédiat	animal75	perroquet	animal	New-oldGist	meaningfull	1	r	s	r	2106	506	2106	gist075_2	1920	R-gist	0	1	4			r	8	8	MF_N_oldGist_1920_1
P02	0 immédiat	paysage8	grand canyon	paysage	New-oldGist	meaningfull	1	e	s	e	1329	1582	1329	gist108_2	1920	R-gist	0	1	3			e	7	7	MF_N_oldGist_1920_1
P02	0 immédiat	paysage23	cascade	paysage	New-oldGist	meaningfull	1	r	s	r	862	968	862	gist123_2	1920	R-gist	0	1	4			r	8	8	MF_N_oldGist_1920_1
P02	0 immédiat	paysage28	farwest	paysage	New-oldGist	meaningfull	1	r	s	r	254	348	254	gist128_2	1920	R-gist	0	1	4			r	8	8	MF_N_oldGist_1920_1
P02	0 immédiat	objet isole10	marteau	objet isole	New-oldGist	meaningfull	1	e	s	e	862	1700	862	gist159_2	1920	R-gist	0	1	3			e	7	7	MF_N_oldGist_1920_1
P02	0 immédiat	fuit/legumes isoles4	banane	fruits/legumes	New-oldGist	meaningfull	1	e	s	e	591	571	591	gist404_3	1920	R-gist	0	1	3			e	7	7	MF_N_oldGist_1920_1
P02	0 immédiat	fuit/legumes isoles27	pain	fruits/legumes	New-oldGist	meaningfull	1	r	s	r	610	497	610	gist427_2	1920	R-gist	0	1	4			r	8	8	MF_N_oldGist_1920_1
P02	0 immédiat	fuit/legumes isoles46	Å“uf	fruits/legumes	New-oldGist	meaningfull	1	r	s	r	792	1524	792	gist447_2	1920	R-gist	0	1	4			r	8	8	MF_N_oldGist_1920_1
P02	0 immédiat	animal15	poisson	animal	New-oldGist	meaningfull	2	z	s	z	306	482	306	gist015_2	1920	R-gist	0	1	2			z	6	6	MF_N_oldGist_1920_2
P02	0 immédiat	animal47	chevre	animal	New-oldGist	meaningfull	2	r	s	r	1295	631	1295	gist047_2	1920	R-gist	0	1	4			r	8	8	MF_N_oldGist_1920_2
P02	0 immédiat	animal78	casoar	animal	New-oldGist	meaningfull	2	e	s	e	1942	1738	1942	gist078_2	1920	R-gist	0	1	3			e	7	7	MF_N_oldGist_1920_2
P02	0 immédiat	paysage15	fond marin	paysage	New-oldGist	meaningfull	2	r	s	r	273	451	273	gist115_2	1920	R-gist	0	1	4			r	8	8	MF_N_oldGist_1920_2
P02	0 immédiat	paysage25	route	paysage	New-oldGist	meaningfull	2	r	s	r	248	426	248	gist125_7	1920	R-gist	0	1	4			r	8	8	MF_N_oldGist_1920_2
P02	0 immédiat	objet isole1	balle	objet isole	New-oldGist	meaningfull	2	z	l	z	3957	6171	3957	gist151_2	1920	R-gist	1	0	2	z	3			3	MF_N_oldGist_1920_2
P02	0 immédiat	objet isole17	compa	objet isole	New-oldGist	meaningfull	2	r	s	r	337	403	337	gist166_2	1920	R-gist	0	1	4			r	8	8	MF_N_oldGist_1920_2
P02	0 immédiat	fuit/legumes isoles22	mais	fruits/legumes	New-oldGist	meaningfull	2	e	s	e	931	1371	931	gist422_3	1920	R-gist	0	1	3			e	7	7	MF_N_oldGist_1920_2
P02	0 immédiat	fuit/legumes isoles38	brocoli	fruits/legumes	New-oldGist	meaningfull	2	r	s	r	326	506	326	gist438_3	1920	R-gist	0	1	4			r	8	8	MF_N_oldGist_1920_2
P02	0 immédiat	fuit/legumes isoles57	pizza	fruits/legumes	New-oldGist	meaningfull	2	r	s	r	7420	2025	7420	gist459_2	1920	R-gist	0	1	4			r	8	8	MF_N_oldGist_1920_2
P02	0 immédiat	animal11	varan	animal	New	meaningfull	0	r	s	r	213	318	213	gist011_1		R-newgist	0	1	4			r	8	8	MF_new
P02	0 immédiat	animal12	punaise	animal	New	meaningfull	0	r	s	r	1198	645	1198	gist012_1		R-newgist	0	1	4			r	8	8	MF_new
P02	0 immédiat	animal14	libellule	animal	New	meaningfull	0	r	s	r	414	707	414	gist014_1		R-newgist	0	1	4			r	8	8	MF_new
P02	0 immédiat	animal19	orque	animal	New	meaningfull	0	r	s	r	436	647	436	gist019_1		R-newgist	0	1	4			r	8	8	MF_new
P02	0 immédiat	animal23	buffle	animal	New	meaningfull	0	a	l	a	5054	1045	5054	gist023_1		R-newgist	1	0	1	a	4			4	MF_new
P02	0 immédiat	animal24	hippopotame	animal	New	meaningfull	0	e	s	e	326	765	326	gist024_1		R-newgist	0	1	3			e	7	7	MF_new
P02	0 immédiat	animal32	renard	animal	New	meaningfull	0	r	s	r	507	511	507	gist032_1		R-newgist	0	1	4			r	8	8	MF_new
P02	0 immédiat	animal34	lion	animal	New	meaningfull	0	e	s	e	236	923	236	gist034_4		R-newgist	0	1	3			e	7	7	MF_new
P02	0 immédiat	animal36	chat	animal	New	meaningfull	0	r	s	r	255	497	255	gist036_2		R-newgist	0	1	4			r	8	8	MF_new
P02	0 immédiat	animal46	leopard	animal	New	meaningfull	0	e	s	e	749	1805	749	gist046_2		R-newgist	0	1	3			e	7	7	MF_new
P02	0 immédiat	animal120	blereau	animal	New	meaningfull	0	e	s	e	297	1106	297	gist050_2		R-newgist	0	1	3			e	7	7	MF_new
P02	0 immédiat	animal55	singe	animal	New	meaningfull	0	z	l	z	626	853	626	gist055_1		R-newgist	1	0	2	z	3			3	MF_new
P02	0 immédiat	animal66	autruche	animal	New	meaningfull	0	r	l	r	478	2772	478	gist066_1		R-newgist	1	0	4	r	1			1	MF_new
P02	0 immédiat	animal69	oiseau	animal	New	meaningfull	0	e	s	e	2833	977	2833	gist069_1		R-newgist	0	1	3			e	7	7	MF_new
P02	0 immédiat	animal71	oie	animal	New	meaningfull	0	r	s	r	754	1013	754	gist071_1		R-newgist	0	1	4			r	8	8	MF_new
P02	0 immédiat	animal72	oiseau2	animal	New	meaningfull	0	e	s	e	718	2576	718	gist072_1		R-newgist	0	1	3			e	7	7	MF_new
P02	0 immédiat	paysage5	coucher de soleil	paysage	New	meaningfull	0	r	s	r	247	436	247	gist105_1		R-newgist	0	1	4			r	8	8	MF_new
P02	0 immédiat	paysage7	foret	paysage	New	meaningfull	0	z	l	z	607	1298	607	gist107_2		R-newgist	1	0	2	z	3			3	MF_new
P02	0 immédiat	paysage10	montagne	paysage	New	meaningfull	0	r	s	r	1159	1757	1159	gist110_1		R-newgist	0	1	4			r	8	8	MF_new
P02	0 immédiat	paysage18	neige	paysage	New	meaningfull	0	a	s	a	237	452	237	gist118_1		R-newgist	0	1	1			a	5	5	MF_new
P02	0 immédiat	paysage22	mer/montagne	paysage	New	meaningfull	0	e	l	e	660	1167	660	gist122_1		R-newgist	1	0	3	e	2			2	MF_new
P02	0 immédiat	paysage26	desert	paysage	New	meaningfull	0	r	s	r	1825	1448	1825	gist126_1		R-newgist	0	1	4			r	8	8	MF_new
P02	0 immédiat	objet isole7	trombone	objet isole	New	meaningfull	0	z	s	z	1542	1100	1542	gist157_1		R-newgist	0	1	2			z	6	6	MF_new
P02	0 immédiat	objet isole9	fil	objet isole	New	meaningfull	0	r	l	r	306	633	306	gist158_1		R-newgist	1	0	4	r	1			1	MF_new
P02	0 immédiat	objet isole15	crayon	objet isole	New	meaningfull	0	e	l	e	1176	2147	1176	gist164_1		R-newgist	1	0	3	e	2			2	MF_new
P02	0 immédiat	objet isole27	pioche	objet isole	New	meaningfull	0	r	s	r	925	629	925	gist176_1		R-newgist	0	1	4			r	8	8	MF_new
P02	0 immédiat	objet isole29	mÃ¨che	objet isole	New	meaningfull	0	e	s	e	408	419	408	gist178_1		R-newgist	0	1	3			e	7	7	MF_new
P02	0 immédiat	objet isole30	niveau	objet isole	New	meaningfull	0	r	s	r	1987	1193	1987	gist179_1		R-newgist	0	1	4			r	8	8	MF_new
P02	0 immédiat	fuit/legumes isoles11	kiwi	fruits/legumes	New	meaningfull	0	r	l	r	307	396	307	gist411_1		R-newgist	1	0	4	r	1			1	MF_new
P02	0 immédiat	fuit/legumes isoles13	citron vert	fruits/legumes	New	meaningfull	0	r	s	r	1327	654	1327	gist413_1		R-newgist	0	1	4			r	8	8	MF_new
P02	0 immédiat	fuit/legumes isoles15	amande	fruits/legumes	New	meaningfull	0	z	s	z	1323	3404	1323	gist415_2		R-newgist	0	1	2			z	6	6	MF_new
P02	0 immédiat	fuit/legumes isoles16	litchi	fruits/legumes	New	meaningfull	0	z	s	z	904	626	904	gist416_1		R-newgist	0	1	2			z	6	6	MF_new
P02	0 immédiat	fuit/legumes isoles17	melon	fruits/legumes	New	meaningfull	0	z	l	z	1509	2652	1509	gist417_1		R-newgist	1	0	2	z	3			3	MF_new
P02	0 immédiat	fuit/legumes isoles20	courgette	fruits/legumes	New	meaningfull	0	e	l	e	2020	2552	2020	gist420_1		R-newgist	1	0	3	e	2			2	MF_new
P02	0 immédiat	fuit/legumes isoles21	framboise	fruits/legumes	New	meaningfull	0	e	l	e	2850	925	2850	gist421_1		R-newgist	1	0	3	e	2			2	MF_new
P02	0 immédiat	fuit/legumes isoles23	gateau	fruits/legumes	New	meaningfull	0	r	s	r	384	443	384	gist423_2		R-newgist	0	1	4			r	8	8	MF_new
P02	0 immédiat	fuit/legumes isoles24	hotdog	fruits/legumes	New	meaningfull	0	e	s	e	1726	82	1726	gist424_2		R-newgist	0	1	3			e	7	7	MF_new
P02	0 immédiat	fuit/legumes isoles35	patate	fruits/legumes	New	meaningfull	0	z	s	z	672	421	672	gist435_2		R-newgist	0	1	2			z	6	6	MF_new
P02	0 immédiat	fuit/legumes isoles44	noisette	fruits/legumes	New	meaningfull	0	z	l	z	933	4635	933	gist444_2		R-newgist	1	0	2	z	3			3	MF_new
P02	0 immédiat	fuit/legumes isoles48	figue	fruits/legumes	New	meaningfull	0	r	s	r	1730	1563	1730	gist448_3		R-newgist	0	1	4			r	8	8	MF_new
P02	0 immédiat	meaningless091	meanigless	meanigless	New	meaningless	0	r	s	r	4094	2765	4094	Image0007		New	0	1	4			r	8	8	ML_new
P02	0 immédiat	meaningless109	meanigless	meanigless	New	meaningless	0	r	s	r	1193	1454	1193	Image0008		New	0	1	4			r	8	8	ML_new
P02	0 immédiat	meaningless127	meanigless	meanigless	New	meaningless	0	e	l	e	199	406	199	Image0011		New	1	0	3	e	2			2	ML_new
P02	0 immédiat	meaningless159	meanigless	meanigless	New	meaningless	0	e	l	e	990	2938	990	Image0016		New	1	0	3	e	2			2	ML_new
P02	0 immédiat	meaningless145	meanigless	meanigless	New	meaningless	0	e	s	e	1460	536	1460	Image0069		New	0	1	3			e	7	7	ML_new
P02	0 immédiat	meaningless092	meanigless	meanigless	New	meaningless	0	z	s	z	428	552	428	Image0084		New	0	1	2			z	6	6	ML_new
P02	0 immédiat	meaningless110	meanigless	meanigless	New	meaningless	0	e	s	e	2134	842	2134	Image0085		New	0	1	3			e	7	7	ML_new
P02	0 immédiat	meaningless141	meanigless	meanigless	New	meaningless	0	z	s	z	275	2038	275	Image0086		New	0	1	2			z	6	6	ML_new
P02	0 immédiat	meaningless160	meanigless	meanigless	New	meaningless	0	e	l	e	842	2077	842	Image0089		New	1	0	3	e	2			2	ML_new
P02	0 immédiat	meaningless146	meanigless	meanigless	New	meaningless	0	e	s	e	593	915	593	Image0103		New	0	1	3			e	7	7	ML_new
P02	0 immédiat	meaningless093	meanigless	meanigless	New	meaningless	0	z	l	z	665	616	665	Image0119		New	1	0	2	z	3			3	ML_new
P02	0 immédiat	meaningless111	meanigless	meanigless	New	meaningless	0	z	l	z	394	810	394	Image0122		New	1	0	2	z	3			3	ML_new
P02	0 immédiat	meaningless128	meanigless	meanigless	New	meaningless	0	a	s	a	418	795	418	Image0123		New	0	1	1			a	5	5	ML_new
P02	0 immédiat	meaningless147	meanigless	meanigless	New	meaningless	0	z	s	z	983	1615	983	Image0155		New	0	1	2			z	6	6	ML_new
P02	0 immédiat	meaningless094	meanigless	meanigless	New	meaningless	0	a	s	a	284	1240	284	Image0171		New	0	1	1			a	5	5	ML_new
P02	0 immédiat	meaningless112	meanigless	meanigless	New	meaningless	0	z	s	z	266	888	266	Image0172		New	0	1	2			z	6	6	ML_new
P02	0 immédiat	meaningless129	meanigless	meanigless	New	meaningless	0	z	s	z	2725	1822	2725	Image0174		New	0	1	2			z	6	6	ML_new
P02	0 immédiat	meaningless105	meanigless	meanigless	New	meaningless	0	z	l	z	1125	1058	1125	Image0201		New	1	0	2	z	3			3	ML_new
P02	0 immédiat	meaningless123	meanigless	meanigless	New	meaningless	0	e	s	e	251	1473	251	Image0202		New	0	1	3			e	7	7	ML_new
P02	0 immédiat	meaningless148	meanigless	meanigless	New	meaningless	0	e	s	e	224	1001	224	Image0214		New	0	1	3			e	7	7	ML_new
P02	0 immédiat	meaningless095	meanigless	meanigless	New	meaningless	0	e	s	e	220	389	220	Image0235		New	0	1	3			e	7	7	ML_new
P02	0 immédiat	meaningless124	meanigless	meanigless	New	meaningless	0	z	s	z	1448	1983	1448	Image0239		New	0	1	2			z	6	6	ML_new
P02	0 immédiat	meaningless130	meanigless	meanigless	New	meaningless	0	z	s	z	734	563	734	Image0240		New	0	1	2			z	6	6	ML_new
P02	0 immédiat	meaningless149	meanigless	meanigless	New	meaningless	0	e	s	e	277	495	277	Image0340		New	0	1	3			e	7	7	ML_new
P02	0 immédiat	meaningless087	meanigless	meanigless	New	meaningless	0	e	s	e	293	363	293	Image0381		New	0	1	3			e	7	7	ML_new
P02	0 immédiat	meaningless096	meanigless	meanigless	New	meaningless	0	z	s	z	1155	518	1155	Image0386		New	0	1	2			z	6	6	ML_new
P02	0 immédiat	meaningless113	meanigless	meanigless	New	meaningless	0	r	s	r	294	634	294	Image0402		New	0	1	4			r	8	8	ML_new
P02	0 immédiat	meaningless131	meanigless	meanigless	New	meaningless	0	e	s	e	245	527	245	Image0403		New	0	1	3			e	7	7	ML_new
P02	0 immédiat	meaningless097	meanigless	meanigless	New	meaningless	0	e	l	e	282	412	282	Image0456		New	1	0	3	e	2			2	ML_new
P02	0 immédiat	meaningless114	meanigless	meanigless	New	meaningless	0	z	l	z	747	1744	747	Image0457		New	1	0	2	z	3			3	ML_new
P02	0 immédiat	meaningless132	meanigless	meanigless	New	meaningless	0	z	s	z	699	1394	699	Image0458		New	0	1	2			z	6	6	ML_new
P02	0 immédiat	meaningless150	meanigless	meanigless	New	meaningless	0	r	s	r	660	607	660	Image0476		New	0	1	4			r	8	8	ML_new
P02	0 immédiat	meaningless098	meanigless	meanigless	New	meaningless	0	z	s	z	1328	636	1328	Image0486		New	0	1	2			z	6	6	ML_new
P02	0 immédiat	meaningless115	meanigless	meanigless	New	meaningless	0	z	l	z	1026	2089	1026	Image0487		New	1	0	2	z	3			3	ML_new
P02	0 immédiat	meaningless133	meanigless	meanigless	New	meaningless	0	e	s	e	689	1380	689	Image0488		New	0	1	3			e	7	7	ML_new
P02	0 immédiat	meaningless151	meanigless	meanigless	New	meaningless	0	e	s	e	1917	1040	1917	Image0609		New	0	1	3			e	7	7	ML_new
P02	0 immédiat	meaningless099	meanigless	meanigless	New	meaningless	0	z	s	z	1283	1632	1283	Image0617		New	0	1	2			z	6	6	ML_new
P02	0 immédiat	meaningless116	meanigless	meanigless	New	meaningless	0	z	s	z	688	3785	688	Image0618		New	0	1	2			z	6	6	ML_new
P02	0 immédiat	meaningless134	meanigless	meanigless	New	meaningless	0	e	s	e	301	433	301	Image0619		New	0	1	3			e	7	7	ML_new
P02	0 immédiat	meaningless088	meanigless	meanigless	New	meaningless	0	z	l	z	616	2194	616	Image0630		New	1	0	2	z	3			3	ML_new
P02	0 immédiat	meaningless152	meanigless	meanigless	New	meaningless	0	r	s	r	285	344	285	Image0635		New	0	1	4			r	8	8	ML_new
P02	0 immédiat	meaningless081	meanigless	meanigless	New	meaningless	0	e	l	e	382	1261	382	Image0643		New	1	0	3	e	2			2	ML_new
P02	0 immédiat	meaningless100	meanigless	meanigless	New	meaningless	0	z	l	z	1186	522	1186	Image0644		New	1	0	2	z	3			3	ML_new
P02	0 immédiat	meaningless117	meanigless	meanigless	New	meaningless	0	z	s	z	762	5391	762	Image0645		New	0	1	2			z	6	6	ML_new
P02	0 immédiat	meaningless135	meanigless	meanigless	New	meaningless	0	r	s	r	1635	1677	1635	Image0646		New	0	1	4			r	8	8	ML_new
P02	0 immédiat	meaningless153	meanigless	meanigless	New	meaningless	0	r	s	r	1524	714	1524	Image0664		New	0	1	4			r	8	8	ML_new
P02	0 immédiat	meaningless082	meanigless	meanigless	New	meaningless	0	e	l	e	456	582	456	Image0671		New	1	0	3	e	2			2	ML_new
P02	0 immédiat	meaningless101	meanigless	meanigless	New	meaningless	0	z	s	z	960	599	960	Image0672		New	0	1	2			z	6	6	ML_new
P02	0 immédiat	meaningless118	meanigless	meanigless	New	meaningless	0	r	l	r	252	367	252	Image0673		New	1	0	4	r	1			1	ML_new
P02	0 immédiat	meaningless136	meanigless	meanigless	New	meaningless	0	a	s	a	850	4802	850	Image0674		New	0	1	1			a	5	5	ML_new
P02	0 immédiat	meaningless154	meanigless	meanigless	New	meaningless	0	r	l	r	302	380	302	Image0691		New	1	0	4	r	1			1	ML_new
P02	0 immédiat	meaningless083	meanigless	meanigless	New	meaningless	0	e	s	e	477	2368	477	Image0698		New	0	1	3			e	7	7	ML_new
P02	0 immédiat	meaningless102	meanigless	meanigless	New	meaningless	0	e	s	e	474	724	474	Image0701		New	0	1	3			e	7	7	ML_new
P02	0 immédiat	meaningless119	meanigless	meanigless	New	meaningless	0	r	s	r	691	1782	691	Image0702		New	0	1	4			r	8	8	ML_new
P02	0 immédiat	meaningless137	meanigless	meanigless	New	meaningless	0	z	l	z	374	639	374	Image0704		New	1	0	2	z	3			3	ML_new
P02	0 immédiat	meaningless155	meanigless	meanigless	New	meaningless	0	z	l	z	616	2332	616	Image0896		New	1	0	2	z	3			3	ML_new
P02	0 immédiat	meaningless084	meanigless	meanigless	New	meaningless	0	e	s	e	369	607	369	Image0932		New	0	1	3			e	7	7	ML_new
P02	0 immédiat	meaningless103	meanigless	meanigless	New	meaningless	0	e	s	e	548	892	548	Image0933		New	0	1	3			e	7	7	ML_new
P02	0 immédiat	meaningless120	meanigless	meanigless	New	meaningless	0	e	s	e	497	1190	497	Image1001		New	0	1	3			e	7	7	ML_new
P02	0 immédiat	meaningless138	meanigless	meanigless	New	meaningless	0	e	s	e	1227	621	1227	Image1101		New	0	1	3			e	7	7	ML_new
P02	0 immédiat	meaningless156	meanigless	meanigless	New	meaningless	0	e	s	e	234	390	234	Image1207		New	0	1	3			e	7	7	ML_new
P02	0 immédiat	meaningless085	meanigless	meanigless	New	meaningless	0	z	s	z	942	1496	942	Image1215		New	0	1	2			z	6	6	ML_new
P02	0 immédiat	meaningless106	meanigless	meanigless	New	meaningless	0	e	s	e	888	1435	888	Image1216		New	0	1	3			e	7	7	ML_new
P02	0 immédiat	meaningless121	meanigless	meanigless	New	meaningless	0	e	l	e	273	385	273	Image1217		New	1	0	3	e	2			2	ML_new
P02	0 immédiat	meaningless139	meanigless	meanigless	New	meaningless	0	e	s	e	532	1141	532	Image1218		New	0	1	3			e	7	7	ML_new
P02	0 immédiat	meaningless142	meanigless	meanigless	New	meaningless	0	e	s	e	295	868	295	Image1232		New	0	1	3			e	7	7	ML_new
P02	0 immédiat	meaningless157	meanigless	meanigless	New	meaningless	0	z	s	z	2776	4220	2776	Image1234		New	0	1	2			z	6	6	ML_new
P02	0 immédiat	meaningless086	meanigless	meanigless	New	meaningless	0	z	l	z	597	1782	597	Image1245		New	1	0	2	z	3			3	ML_new
P02	0 immédiat	meaningless104	meanigless	meanigless	New	meaningless	0	z	s	z	578	445	578	Image1246		New	0	1	2			z	6	6	ML_new
P02	0 immédiat	meaningless122	meanigless	meanigless	New	meaningless	0	e	l	e	292	340	292	Image1247		New	1	0	3	e	2			2	ML_new
P02	0 immédiat	meaningless140	meanigless	meanigless	New	meaningless	0	e	s	e	1490	630	1490	Image1250		New	0	1	3			e	7	7	ML_new
P02	0 immédiat	meaningless158	meanigless	meanigless	New	meaningless	0	z	s	z	3630	1427	3630	Image1273		New	0	1	2			z	6	6	ML_new
P02	0 immédiat	meaningless089	meanigless	meanigless	New	meaningless	0	e	s	e	539	1190	539	R17		New	0	1	3			e	7	7	ML_new
P02	0 immédiat	meaningless107	meanigless	meanigless	New	meaningless	0	z	l	z	655	900	655	R18		New	1	0	2	z	3			3	ML_new
P02	0 immédiat	meaningless125	meanigless	meanigless	New	meaningless	0	r	s	r	625	597	625	R19		New	0	1	4			r	8	8	ML_new
P02	0 immédiat	meaningless143	meanigless	meanigless	New	meaningless	0	e	l	e	363	547	363	R20		New	1	0	3	e	2			2	ML_new
P02	0 immédiat	meaningless090	meanigless	meanigless	New	meaningless	0	e	s	e	3754	1821	3754	R5		New	0	1	3			e	7	7	ML_new
P02	0 immédiat	meaningless108	meanigless	meanigless	New	meaningless	0	z	s	z	424	2775	424	R6		New	0	1	2			z	6	6	ML_new
P02	0 immédiat	meaningless126	meanigless	meanigless	New	meaningless	0	e	l	e	261	345	261	R7		New	1	0	3	e	2			2	ML_new
P02	0 immédiat	meaningless144	meanigless	meanigless	New	meaningless	0	e	l	e	316	529	316	R8		New	1	0	3	e	2			2	ML_new
P02	0 immédiat	meaningless177	meanigless	meanigless	Old	meaningless	1	z	l	z	669	1942	669	Image0070	120	Old	1	0	2	z	3			3	ML_old_120_1
P02	0 immédiat	meaningless209	meanigless	meanigless	Old	meaningless	1	z	s	z	667	685	667	Image0071	120	Old	0	1	2			z	6	6	ML_old_120_1
P02	0 immédiat	meaningless161	meanigless	meanigless	Old	meaningless	1	a	s	a	814	658	814	Image0128	120	Old	0	1	1			a	5	5	ML_old_120_1
P02	0 immédiat	meaningless225	meanigless	meanigless	Old	meaningless	1	e	l	e	282	380	282	Image0132	120	Old	1	0	3	e	2			2	ML_old_120_1
P02	0 immédiat	meaningless193	meanigless	meanigless	Old	meaningless	1	z	s	z	2617	1754	2617	Image0178	120	Old	0	1	2			z	6	6	ML_old_120_1
P02	0 immédiat	meaningless181	meanigless	meanigless	Old	meaningless	1	r	s	r	2724	1527	2724	Image0344	120	Old	0	1	4			r	8	8	ML_old_120_1
P02	0 immédiat	meaningless213	meanigless	meanigless	Old	meaningless	1	z	s	z	1852	1073	1852	Image0348	120	Old	0	1	2			z	6	6	ML_old_120_1
P02	0 immédiat	meaningless173	meanigless	meanigless	Old	meaningless	1	e	s	e	285	441	285	Image0425	120	Old	0	1	3			e	7	7	ML_old_120_1
P02	0 immédiat	meaningless237	meanigless	meanigless	Old	meaningless	1	z	l	z	331	720	331	Image0427	120	Old	1	0	2	z	3			3	ML_old_120_1
P02	0 immédiat	meaningless165	meanigless	meanigless	Old	meaningless	1	e	s	e	835	786	835	Image0461	120	Old	0	1	3			e	7	7	ML_old_120_1
P02	0 immédiat	meaningless229	meanigless	meanigless	Old	meaningless	1	e	s	e	757	731	757	Image0465	120	Old	0	1	3			e	7	7	ML_old_120_1
P02	0 immédiat	meaningless206	meanigless	meanigless	Old	meaningless	1	e	l	e	760	711	760	Image0477	120	Old	1	0	3	e	2			2	ML_old_120_1
P02	0 immédiat	meaningless197	meanigless	meanigless	Old	meaningless	1	z	l	z	1365	1873	1365	Image0501	120	Old	1	0	2	z	3			3	ML_old_120_1
P02	0 immédiat	meaningless185	meanigless	meanigless	Old	meaningless	1	e	s	e	486	767	486	Image0665	120	Old	0	1	3			e	7	7	ML_old_120_1
P02	0 immédiat	meaningless217	meanigless	meanigless	Old	meaningless	1	r	l	r	982	1226	982	Image0666	120	Old	1	0	4	r	1			1	ML_old_120_1
P02	0 immédiat	meaningless169	meanigless	meanigless	Old	meaningless	1	z	s	z	2788	5028	2788	Image0676	120	Old	0	1	2			z	6	6	ML_old_120_1
P02	0 immédiat	meaningless233	meanigless	meanigless	Old	meaningless	1	z	s	z	1863	2158	1863	Image0785	120	Old	0	1	2			z	6	6	ML_old_120_1
P02	0 immédiat	meaningless202	meanigless	meanigless	Old	meaningless	1	e	s	e	2533	987	2533	Image1104	120	Old	0	1	3			e	7	7	ML_old_120_1
P02	0 immédiat	meaningless189	meanigless	meanigless	Old	meaningless	1	e	l	e	626	957	626	Image1235	120	Old	1	0	3	e	2			2	ML_old_120_1
P02	0 immédiat	meaningless221	meanigless	meanigless	Old	meaningless	1	e	s	e	529	1760	529	Image1236	120	Old	0	1	3			e	7	7	ML_old_120_1
P02	0 immédiat	meaningless191	meanigless	meanigless	Old	meaningless	2	e	l	e	1002	548	1002	Image0017	120	Old	1	0	3	e	2			2	ML_old_120_2
P02	0 immédiat	meaningless223	meanigless	meanigless	Old	meaningless	2	e	l	e	882	566	882	Image0018	120	Old	1	0	3	e	2			2	ML_old_120_2
P02	0 immédiat	meaningless179	meanigless	meanigless	Old	meaningless	2	z	s	z	314	2054	314	Image0157	120	Old	0	1	2			z	6	6	ML_old_120_2
P02	0 immédiat	meaningless211	meanigless	meanigless	Old	meaningless	2	z	l	z	436	2623	436	Image0162	120	Old	1	0	2	z	3			3	ML_old_120_2
P02	0 immédiat	meaningless163	meanigless	meanigless	Old	meaningless	2	e	s	e	1241	1889	1241	Image0242	120	Old	0	1	3			e	7	7	ML_old_120_2
P02	0 immédiat	meaningless227	meanigless	meanigless	Old	meaningless	2	e	l	e	813	499	813	Image0246	120	Old	1	0	3	e	2			2	ML_old_120_2
P02	0 immédiat	meaningless195	meanigless	meanigless	Old	meaningless	2	e	s	e	520	697	520	Image0412	120	Old	0	1	3			e	7	7	ML_old_120_2
P02	0 immédiat	meaningless183	meanigless	meanigless	Old	meaningless	2	e	s	e	820	2163	820	Image0610	120	Old	0	1	3			e	7	7	ML_old_120_2
P02	0 immédiat	meaningless215	meanigless	meanigless	Old	meaningless	2	a	s	a	1311	3321	1311	Image0611	120	Old	0	1	1			a	5	5	ML_old_120_2
P02	0 immédiat	meaningless167	meanigless	meanigless	Old	meaningless	2	z	s	z	312	433	312	Image0621	120	Old	0	1	2			z	6	6	ML_old_120_2
P02	0 immédiat	meaningless231	meanigless	meanigless	Old	meaningless	2	z	s	z	232	1780	232	Image0623	120	Old	0	1	2			z	6	6	ML_old_120_2
P02	0 immédiat	meaningless199	meanigless	meanigless	Old	meaningless	2	z	l	z	484	644	484	Image0651	120	Old	1	0	2	z	3			3	ML_old_120_2
P02	0 immédiat	meaningless187	meanigless	meanigless	Old	meaningless	2	r	s	r	597	1348	597	Image0897	120	Old	0	1	4			r	8	8	ML_old_120_2
P02	0 immédiat	meaningless219	meanigless	meanigless	Old	meaningless	2	r	s	r	661	1371	661	Image0916	120	Old	0	1	4			r	8	8	ML_old_120_2
P02	0 immédiat	meaningless171	meanigless	meanigless	Old	meaningless	2	z	l	z	1327	1220	1327	Image1103	120	Old	1	0	2	z	3			3	ML_old_120_2
P02	0 immédiat	meaningless235	meanigless	meanigless	Old	meaningless	2	e	s	e	551	2554	551	Image1222	120	Old	0	1	3			e	7	7	ML_old_120_2
P02	0 immédiat	meaningless204	meanigless	meanigless	Old	meaningless	2	e	l	e	433	1018	433	Image1253	120	Old	1	0	3	e	2			2	ML_old_120_2
P02	0 immédiat	meaningless175	meanigless	meanigless	Old	meaningless	2	e	s	e	256	405	256	R10	120	Old	0	1	3			e	7	7	ML_old_120_2
P02	0 immédiat	meaningless239	meanigless	meanigless	Old	meaningless	2	r	l	r	533	1188	533	R12	120	Old	1	0	4	r	1			1	ML_old_120_2
P02	0 immédiat	meaningless208	meanigless	meanigless	Old	meaningless	2	e	s	e	719	674	719	R23	120	Old	0	1	3			e	7	7	ML_old_120_2
P02	0 immédiat	meaningless178	meanigless	meanigless	Old	meaningless	1	z	l	z	4334	3592	4334	Image0107	1920	Old	1	0	2	z	3			3	ML_old_1920_1
P02	0 immédiat	meaningless210	meanigless	meanigless	Old	meaningless	1	e	l	e	674	965	674	Image0108	1920	Old	1	0	3	e	2			2	ML_old_1920_1
P02	0 immédiat	meaningless205	meanigless	meanigless	Old	meaningless	1	z	s	z	5579	5176	5579	Image0129	1920	Old	0	1	2			z	6	6	ML_old_1920_1
P02	0 immédiat	meaningless162	meanigless	meanigless	Old	meaningless	1	e	s	e	1437	1866	1437	Image0176	1920	Old	0	1	3			e	7	7	ML_old_1920_1
P02	0 immédiat	meaningless226	meanigless	meanigless	Old	meaningless	1	z	l	z	1953	2901	1953	Image0179	1920	Old	1	0	2	z	3			3	ML_old_1920_1
P02	0 immédiat	meaningless194	meanigless	meanigless	Old	meaningless	1	a	s	a	4329	525	4329	Image0243	1920	Old	0	1	1			a	5	5	ML_old_1920_1
P02	0 immédiat	meaningless182	meanigless	meanigless	Old	meaningless	1	e	s	e	315	760	315	Image0426	1920	Old	0	1	3			e	7	7	ML_old_1920_1
P02	0 immédiat	meaningless214	meanigless	meanigless	Old	meaningless	1	r	l	r	1782	1596	1782	Image0478	1920	Old	1	0	4	r	1			1	ML_old_1920_1
P02	0 immédiat	meaningless166	meanigless	meanigless	Old	meaningless	1	z	l	z	559	549	559	Image0494	1920	Old	1	0	2	z	3			3	ML_old_1920_1
P02	0 immédiat	meaningless230	meanigless	meanigless	Old	meaningless	1	z	s	z	923	2729	923	Image0542	1920	Old	0	1	2			z	6	6	ML_old_1920_1
P02	0 immédiat	meaningless198	meanigless	meanigless	Old	meaningless	1	z	s	z	5155	2552	5155	Image0622	1920	Old	0	1	2			z	6	6	ML_old_1920_1
P02	0 immédiat	meaningless238	meanigless	meanigless	Old	meaningless	1	z	l	z	1164	825	1164	Image0680	1920	Old	1	0	2	z	3			3	ML_old_1920_1
P02	0 immédiat	meaningless186	meanigless	meanigless	Old	meaningless	1	e	s	e	995	557	995	Image0692	1920	Old	0	1	3			e	7	7	ML_old_1920_1
P02	0 immédiat	meaningless218	meanigless	meanigless	Old	meaningless	1	r	l	r	414	1350	414	Image0693	1920	Old	1	0	4	r	1			1	ML_old_1920_1
P02	0 immédiat	meaningless170	meanigless	meanigless	Old	meaningless	1	e	s	e	1861	604	1861	Image0760	1920	Old	0	1	3			e	7	7	ML_old_1920_1
P02	0 immédiat	meaningless201	meanigless	meanigless	Old	meaningless	1	r	l	r	535	1284	535	Image0764	1920	Old	1	0	4	r	1			1	ML_old_1920_1
P02	0 immédiat	meaningless234	meanigless	meanigless	Old	meaningless	1	e	s	e	552	1399	552	Image1105	1920	Old	0	1	3			e	7	7	ML_old_1920_1
P02	0 immédiat	meaningless174	meanigless	meanigless	Old	meaningless	1	z	l	z	353	1656	353	Image1252	1920	Old	1	0	2	z	3			3	ML_old_1920_1
P02	0 immédiat	meaningless190	meanigless	meanigless	Old	meaningless	1	e	l	e	2243	824	2243	Image1274	1920	Old	1	0	3	e	2			2	ML_old_1920_1
P02	0 immédiat	meaningless222	meanigless	meanigless	Old	meaningless	1	e	s	e	282	502	282	Image1277	1920	Old	0	1	3			e	7	7	ML_old_1920_1
P02	0 immédiat	meaningless192	meanigless	meanigless	Old	meaningless	2	z	l	z	601	3188	601	Image0090	1920	Old	1	0	2	z	3			3	ML_old_1920_2
P02	0 immédiat	meaningless224	meanigless	meanigless	Old	meaningless	2	e	l	e	427	460	427	Image0091	1920	Old	1	0	3	e	2			2	ML_old_1920_2
P02	0 immédiat	meaningless180	meanigless	meanigless	Old	meaningless	2	r	l	r	943	876	943	Image0215	1920	Old	1	0	4	r	1			1	ML_old_1920_2
P02	0 immédiat	meaningless212	meanigless	meanigless	Old	meaningless	2	r	l	r	295	420	295	Image0220	1920	Old	1	0	4	r	1			1	ML_old_1920_2
P02	0 immédiat	meaningless164	meanigless	meanigless	Old	meaningless	2	e	l	e	2884	2391	2884	Image0411	1920	Old	1	0	3	e	2			2	ML_old_1920_2
P02	0 immédiat	meaningless228	meanigless	meanigless	Old	meaningless	2	r	l	r	611	2777	611	Image0413	1920	Old	1	0	4	r	1			1	ML_old_1920_2
P02	0 immédiat	meaningless196	meanigless	meanigless	Old	meaningless	2	r	l	r	911	1597	911	Image0462	1920	Old	1	0	4	r	1			1	ML_old_1920_2
P02	0 immédiat	meaningless184	meanigless	meanigless	Old	meaningless	2	r	s	r	433	579	433	Image0636	1920	Old	0	1	4			r	8	8	ML_old_1920_2
P02	0 immédiat	meaningless216	meanigless	meanigless	Old	meaningless	2	e	l	e	327	907	327	Image0637	1920	Old	1	0	3	e	2			2	ML_old_1920_2
P02	0 immédiat	meaningless168	meanigless	meanigless	Old	meaningless	2	e	s	e	2104	1870	2104	Image0649	1920	Old	0	1	3			e	7	7	ML_old_1920_2
P02	0 immédiat	meaningless232	meanigless	meanigless	Old	meaningless	2	z	s	z	344	1757	344	Image0652	1920	Old	0	1	2			z	6	6	ML_old_1920_2
P02	0 immédiat	meaningless200	meanigless	meanigless	Old	meaningless	2	r	l	r	302	451	302	Image0677	1920	Old	1	0	4	r	1			1	ML_old_1920_2
P02	0 immédiat	meaningless188	meanigless	meanigless	Old	meaningless	2	r	l	r	567	1014	567	Image1208	1920	Old	1	0	4	r	1			1	ML_old_1920_2
P02	0 immédiat	meaningless220	meanigless	meanigless	Old	meaningless	2	r	l	r	1012	1521	1012	Image1209	1920	Old	1	0	4	r	1			1	ML_old_1920_2
P02	0 immédiat	meaningless172	meanigless	meanigless	Old	meaningless	2	r	l	r	1326	1713	1326	Image1220	1920	Old	1	0	4	r	1			1	ML_old_1920_2
P02	0 immédiat	meaningless203	meanigless	meanigless	Old	meaningless	2	e	l	e	671	487	671	Image1221	1920	Old	1	0	3	e	2			2	ML_old_1920_2
P02	0 immédiat	meaningless236	meanigless	meanigless	Old	meaningless	2	e	l	e	609	1210	609	Image1254	1920	Old	1	0	3	e	2			2	ML_old_1920_2
P02	0 immédiat	meaningless207	meanigless	meanigless	Old	meaningless	2	r	l	r	902	1831	902	R11	1920	Old	1	0	4	r	1			1	ML_old_1920_2
P02	0 immédiat	meaningless176	meanigless	meanigless	Old	meaningless	2	z	s	z	934	458	934	R22	1920	Old	0	1	2			z	6	6	ML_old_1920_2
P02	0 immédiat	meaningless240	meanigless	meanigless	Old	meaningless	2	e	s	e	705	1918	705	R24	1920	Old	0	1	3			e	7	7	ML_old_1920_2
P03	0 immédiat	animal5	papillon	animal	Old	meaningfull	1	r	l	r	148	377	148	gist005_1	120	Old	1	0	4	r	1			1	MF_old_120_1
P03	0 immédiat	animal17	dauphin	animal	Old	meaningfull	1	r	l	r	396	718	396	gist017_2	120	Old	1	0	4	r	1			1	MF_old_120_1
P03	0 immédiat	animal26	ours	animal	Old	meaningfull	1	r	s	r	211	327	211	gist026_2	120	Old	0	1	4			r	8	8	MF_old_120_1
P03	0 immédiat	animal35	tigre	animal	Old	meaningfull	1	e	l	e	412	1172	412	gist035_2	120	Old	1	0	3	e	2			2	MF_old_120_1
P03	0 immédiat	animal42	giraffe	animal	Old	meaningfull	1	r	l	r	124	338	124	gist042_3	120	Old	1	0	4	r	1			1	MF_old_120_1
P03	0 immédiat	animal52	bouc	animal	Old	meaningfull	1	e	l	e	156	368	156	gist052_2	120	Old	1	0	3	e	2			2	MF_old_120_1
P03	0 immédiat	animal60	panthÃ¨re noire	animal	Old	meaningfull	1	e	l	e	548	1769	548	gist060_2	120	Old	1	0	3	e	2			2	MF_old_120_1
P03	0 immédiat	animal79	cigogne	animal	Old	meaningfull	1	e	l	e	220	353	220	gist079_1	120	Old	1	0	3	e	2			2	MF_old_120_1
P03	0 immédiat	paysage7	foret	paysage	Old	meaningfull	1	e	s	e	84	364	84	gist107_1	120	Old	0	1	3			e	7	7	MF_old_120_1
P03	0 immédiat	paysage19	champ	paysage	Old	meaningfull	1	e	s	e	364	948	364	gist119_1	120	Old	0	1	3			e	7	7	MF_old_120_1
P03	0 immédiat	paysage25	route	paysage	Old	meaningfull	1	e	l	e	180	391	180	gist125_4	120	Old	1	0	3	e	2			2	MF_old_120_1
P03	0 immédiat	objet isole5	eponde	objet isole	Old	meaningfull	1	z	s	z	196	270	196	gist155_1	120	Old	0	1	2			z	6	6	MF_old_120_1
P03	0 immédiat	objet isole13	ciseau	objet isole	Old	meaningfull	1	r	l	r	140	445	140	gist162_1	120	Old	1	0	4	r	1			1	MF_old_120_1
P03	0 immédiat	objet isole23	des	objet isole	Old	meaningfull	1	r	l	r	363	326	363	gist172_1	120	Old	1	0	4	r	1			1	MF_old_120_1
P03	0 immédiat	objet isole31	spatule	objet isole	Old	meaningfull	1	z	l	z	380	414	380	gist180_1	120	Old	1	0	2	z	3			3	MF_old_120_1
P03	0 immédiat	fuit/legumes isoles9	pasteque	fruits/legumes	Old	meaningfull	1	e	l	e	124	278	124	gist409_1	120	Old	1	0	3	e	2			2	MF_old_120_1
P03	0 immédiat	fuit/legumes isoles30	choux	fruits/legumes	Old	meaningfull	1	r	l	r	364	294	364	gist430_2	120	Old	1	0	4	r	1			1	MF_old_120_1
P03	0 immédiat	fuit/legumes isoles36	paplemousse	fruits/legumes	Old	meaningfull	1	r	l	r	132	408	132	gist436_2	120	Old	1	0	4	r	1			1	MF_old_120_1
P03	0 immédiat	fuit/legumes isoles45	haricot	fruits/legumes	Old	meaningfull	1	r	l	r	124	285	124	gist446_2	120	Old	1	0	4	r	1			1	MF_old_120_1
P03	0 immédiat	fuit/legumes isoles56	poivron	fruits/legumes	Old	meaningfull	1	r	l	r	164	348	164	gist457_1	120	Old	1	0	4	r	1			1	MF_old_120_1
P03	0 immédiat	animal8	tortue	animal	Old	meaningfull	2	r	l	r	1172	482	1172	gist008_1	120	Old	1	0	4	r	1			1	MF_old_120_2
P03	0 immédiat	animal21	rinoceroce	animal	Old	meaningfull	2	r	l	r	340	624	340	gist021_1	120	Old	1	0	4	r	1			1	MF_old_120_2
P03	0 immédiat	animal31	loup	animal	Old	meaningfull	2	e	l	e	164	446	164	gist031_1	120	Old	1	0	3	e	2			2	MF_old_120_2
P03	0 immédiat	animal40	cerf	animal	Old	meaningfull	2	z	l	z	396	1230	396	gist040_2	120	Old	1	0	2	z	3			3	MF_old_120_2
P03	0 immédiat	animal45	kangourou	animal	Old	meaningfull	2	r	l	r	155	393	155	gist045_1	120	Old	1	0	4	r	1			1	MF_old_120_2
P03	0 immédiat	animal54	mouton	animal	Old	meaningfull	2	r	l	r	132	310	132	gist054_1	120	Old	1	0	4	r	1			1	MF_old_120_2
P03	0 immédiat	animal67	pinguin	animal	Old	meaningfull	2	r	l	r	540	990	540	gist067_1	120	Old	1	0	4	r	1			1	MF_old_120_2
P03	0 immédiat	paysage2	plage	paysage	Old	meaningfull	2	r	l	r	131	330	131	gist102_1	120	Old	1	0	4	r	1			1	MF_old_120_2
P03	0 immédiat	paysage13	desert:steppe	paysage	Old	meaningfull	2	z	l	z	196	580	196	gist113_2	120	Old	1	0	2	z	3			3	MF_old_120_2
P03	0 immédiat	paysage25	route	paysage	Old	meaningfull	2	r	l	r	900	807	900	gist125_1	120	Old	1	0	4	r	1			1	MF_old_120_2
P03	0 immédiat	objet isole3	brosse Ã dent	objet isole	Old	meaningfull	2	r	l	r	108	366	108	gist153_1	120	Old	1	0	4	r	1			1	MF_old_120_2
P03	0 immédiat	objet isole11	toune_visse	objet isole	Old	meaningfull	2	e	s	e	211	285	211	gist160_1	120	Old	0	1	3			e	7	7	MF_old_120_2
P03	0 immédiat	objet isole16	couverts	objet isole	Old	meaningfull	2	r	l	r	164	484	164	gist165_1	120	Old	1	0	4	r	1			1	MF_old_120_2
P03	0 immédiat	objet isole26	scie	objet isole	Old	meaningfull	2	r	l	r	116	358	116	gist175_1	120	Old	1	0	4	r	1			1	MF_old_120_2
P03	0 immédiat	fuit/legumes isoles3	orange	fruits/legumes	Old	meaningfull	2	r	l	r	140	261	140	gist403_2	120	Old	1	0	4	r	1			1	MF_old_120_2
P03	0 immédiat	fuit/legumes isoles19	tomate	fruits/legumes	Old	meaningfull	2	r	l	r	316	1200	316	gist419_1	120	Old	1	0	4	r	1			1	MF_old_120_2
P03	0 immédiat	fuit/legumes isoles33	myrtille	fruits/legumes	Old	meaningfull	2	e	s	e	1220	2261	1220	gist433_2	120	Old	0	1	3			e	7	7	MF_old_120_2
P03	0 immédiat	fuit/legumes isoles40	jambon	fruits/legumes	Old	meaningfull	2	e	l	e	2036	1566	2036	gist440_2	120	Old	1	0	3	e	2			2	MF_old_120_2
P03	0 immédiat	fuit/legumes isoles51	blette	fruits/legumes	Old	meaningfull	2	r	l	r	172	268	172	gist451_2	120	Old	1	0	4	r	1			1	MF_old_120_2
P03	0 immédiat	fuit/legumes isoles59	radis	fruits/legumes	Old	meaningfull	2	r	l	r	244	459	244	gist461_1	120	Old	1	0	4	r	1			1	MF_old_120_2
P03	0 immédiat	animal6	grenouille	animal	Old	meaningfull	1	r	l	r	196	373	196	gist006_1	1920	Old	1	0	4	r	1			1	MF_old_1920_1
P03	0 immédiat	animal18	ours polaire	animal	Old	meaningfull	1	r	l	r	388	490	388	gist018_2	1920	Old	1	0	4	r	1			1	MF_old_1920_1
P03	0 immédiat	animal30	chien	animal	Old	meaningfull	1	r	l	r	12	332	12	gist030_1	1920	Old	1	0	4	r	1			1	MF_old_1920_1
P03	0 immédiat	animal38	zebre	animal	Old	meaningfull	1	z	l	z	155	429	155	gist038_1	1920	Old	1	0	2	z	3			3	MF_old_1920_1
P03	0 immédiat	animal44	vache	animal	Old	meaningfull	1	e	l	e	364	376	364	gist044_2	1920	Old	1	0	3	e	2			2	MF_old_1920_1
P03	0 immédiat	animal53	bison	animal	Old	meaningfull	1	e	l	e	188	476	188	gist053_1	1920	Old	1	0	3	e	2			2	MF_old_1920_1
P03	0 immédiat	animal62	ane	animal	Old	meaningfull	1	e	l	e	172	370	172	gist062_1	1920	Old	1	0	3	e	2			2	MF_old_1920_1
P03	0 immédiat	animal80	coq	animal	Old	meaningfull	1	r	l	r	99	190	99	gist080_1	1920	Old	1	0	4	r	1			1	MF_old_1920_1
P03	0 immédiat	paysage11	montagne	paysage	Old	meaningfull	1	r	l	r	188	492	188	gist111_1	1920	Old	1	0	4	r	1			1	MF_old_1920_1
P03	0 immédiat	paysage20	champ	paysage	Old	meaningfull	1	r	l	r	196	414	196	gist120_1	1920	Old	1	0	4	r	1			1	MF_old_1920_1
P03	0 immédiat	paysage25	route	paysage	Old	meaningfull	1	e	l	e	140	409	140	gist125_2	1920	Old	1	0	3	e	2			2	MF_old_1920_1
P03	0 immédiat	objet isole4	peigne	objet isole	Old	meaningfull	1	r	l	r	252	738	252	gist154_1	1920	Old	1	0	4	r	1			1	MF_old_1920_1
P03	0 immédiat	objet isole14	pince Ã linge	objet isole	Old	meaningfull	1	r	l	r	148	327	148	gist163_1	1920	Old	1	0	4	r	1			1	MF_old_1920_1
P03	0 immédiat	objet isole24	pince	objet isole	Old	meaningfull	1	e	l	e	140	297	140	gist173_1	1920	Old	1	0	3	e	2			2	MF_old_1920_1
P03	0 immédiat	fuit/legumes isoles1	pomme	fruits/legumes	Old	meaningfull	1	r	l	r	1692	700	1692	gist401_1	1920	Old	1	0	4	r	1			1	MF_old_1920_1
P03	0 immédiat	fuit/legumes isoles18	champignion	fruits/legumes	Old	meaningfull	1	r	l	r	277	284	277	gist418_2	1920	Old	1	0	4	r	1			1	MF_old_1920_1
P03	0 immédiat	fuit/legumes isoles32	cacahouette	fruits/legumes	Old	meaningfull	1	r	l	r	139	393	139	gist432_2	1920	Old	1	0	4	r	1			1	MF_old_1920_1
P03	0 immédiat	fuit/legumes isoles39	poulet	fruits/legumes	Old	meaningfull	1	r	l	r	980	478	980	gist439_2	1920	Old	1	0	4	r	1			1	MF_old_1920_1
P03	0 immédiat	fuit/legumes isoles47	avocat	fruits/legumes	Old	meaningfull	1	e	l	e	148	429	148	gist448_1	1920	Old	1	0	3	e	2			2	MF_old_1920_1
P03	0 immédiat	fuit/legumes isoles58	croissant	fruits/legumes	Old	meaningfull	1	r	l	r	116	353	116	gist460_1	1920	Old	1	0	4	r	1			1	MF_old_1920_1
P03	0 immédiat	animal13	chenille	animal	Old	meaningfull	2	r	l	r	156	377	156	gist013_2	1920	Old	1	0	4	r	1			1	MF_old_1920_2
P03	0 immédiat	animal22	elephant	animal	Old	meaningfull	2	e	l	e	131	276	131	gist022_2	1920	Old	1	0	3	e	2			2	MF_old_1920_2
P03	0 immédiat	animal33	panthÃ¨re	animal	Old	meaningfull	2	r	l	r	180	433	180	gist033_1	1920	Old	1	0	4	r	1			1	MF_old_1920_2
P03	0 immédiat	animal41	oxyx	animal	Old	meaningfull	2	r	l	r	212	962	212	gist041_2	1920	Old	1	0	4	r	1			1	MF_old_1920_2
P03	0 immédiat	animal48	ecureuil	animal	Old	meaningfull	2	r	l	r	1020	455	1020	gist048_1	1920	Old	1	0	4	r	1			1	MF_old_1920_2
P03	0 immédiat	animal56	gorille	animal	Old	meaningfull	2	r	l	r	132	279	132	gist056_1	1920	Old	1	0	4	r	1			1	MF_old_1920_2
P03	0 immédiat	animal77	flaman rose	animal	Old	meaningfull	2	e	l	e	124	431	124	gist077_1	1920	Old	1	0	3	e	2			2	MF_old_1920_2
P03	0 immédiat	paysage4	rocher	paysage	Old	meaningfull	2	e	l	e	172	320	172	gist104_2	1920	Old	1	0	3	e	2			2	MF_old_1920_2
P03	0 immédiat	paysage16	champ de fleur	paysage	Old	meaningfull	2	r	l	r	148	320	148	gist116_1	1920	Old	1	0	4	r	1			1	MF_old_1920_2
P03	0 immédiat	paysage25	route	paysage	Old	meaningfull	2	e	l	e	196	223	196	gist125_10	1920	Old	1	0	3	e	2			2	MF_old_1920_2
P03	0 immédiat	paysage25	route	paysage	Old	meaningfull	2	r	l	r	156	297	156	gist125_8	1920	Old	1	0	4	r	1			1	MF_old_1920_2
P03	0 immédiat	objet isole8	epingles nourisse	objet isole	Old	meaningfull	2	r	l	r	180	348	180	gist157_2	1920	Old	1	0	4	r	1			1	MF_old_1920_2
P03	0 immédiat	objet isole22	raquette	objet isole	Old	meaningfull	2	e	l	e	163	1823	163	gist171_1	1920	Old	1	0	3	e	2			2	MF_old_1920_2
P03	0 immédiat	objet isole28	cle	objet isole	Old	meaningfull	2	r	l	r	228	636	228	gist177_1	1920	Old	1	0	4	r	1			1	MF_old_1920_2
P03	0 immédiat	fuit/legumes isoles5	raisin	fruits/legumes	Old	meaningfull	2	r	l	r	172	452	172	gist405_1	1920	Old	1	0	4	r	1			1	MF_old_1920_2
P03	0 immédiat	fuit/legumes isoles28	cookies	fruits/legumes	Old	meaningfull	2	r	l	r	181	386	181	gist428_2	1920	Old	1	0	4	r	1			1	MF_old_1920_2
P03	0 immédiat	fuit/legumes isoles34	mur	fruits/legumes	Old	meaningfull	2	r	l	r	316	399	316	gist434_2	1920	Old	1	0	4	r	1			1	MF_old_1920_2
P03	0 immédiat	fuit/legumes isoles43	cafe	fruits/legumes	Old	meaningfull	2	r	l	r	108	341	108	gist443_2	1920	Old	1	0	4	r	1			1	MF_old_1920_2
P03	0 immédiat	fuit/legumes isoles52	datte	fruits/legumes	Old	meaningfull	2	r	l	r	156	435	156	gist452_3	1920	Old	1	0	4	r	1			1	MF_old_1920_2
P03	0 immédiat	fuit/legumes isoles60	carotte	fruits/legumes	Old	meaningfull	2	e	l	e	180	534	180	gist462_1	1920	Old	1	0	3	e	2			2	MF_old_1920_2
P03	0 immédiat	animal1	escargot	animal	New-oldGist	meaningfull	1	r	s	r	132	743	132	gist001_2	120	R-gist	0	1	4			r	8	8	MF_N_oldGist_120_1
P03	0 immédiat	animal16	phoque	animal	New-oldGist	meaningfull	1	r	s	r	123	378	123	gist016_2	120	R-gist	0	1	4			r	8	8	MF_N_oldGist_120_1
P03	0 immédiat	animal68	cygne	animal	New-oldGist	meaningfull	1	e	l	e	100	300	100	gist068_2	120	R-gist	1	0	3	e	2			2	MF_N_oldGist_120_1
P03	0 immédiat	paysage1	ciel	paysage	New-oldGist	meaningfull	1	e	s	e	1380	434	1380	gist101_2	120	R-gist	0	1	3			e	7	7	MF_N_oldGist_120_1
P03	0 immédiat	paysage17	banquise	paysage	New-oldGist	meaningfull	1	e	s	e	164	473	164	gist117_1	120	R-gist	0	1	3			e	7	7	MF_N_oldGist_120_1
P03	0 immédiat	paysage27	fougÃ¨re	paysage	New-oldGist	meaningfull	1	e	s	e	244	1047	244	gist127_2	120	R-gist	0	1	3			e	7	7	MF_N_oldGist_120_1
P03	0 immédiat	objet isole2	brosse	objet isole	New-oldGist	meaningfull	1	e	s	e	1309	442	1309	gist152_2	120	R-gist	0	1	3			e	7	7	MF_N_oldGist_120_1
P03	0 immédiat	fuit/legumes isoles2	poire	fruits/legumes	New-oldGist	meaningfull	1	e	l	e	524	1116	524	gist402_1	120	R-gist	1	0	3	e	2			2	MF_N_oldGist_120_1
P03	0 immédiat	fuit/legumes isoles26	fromage	fruits/legumes	New-oldGist	meaningfull	1	e	s	e	404	887	404	gist426_2	120	R-gist	0	1	3			e	7	7	MF_N_oldGist_120_1
P03	0 immédiat	fuit/legumes isoles42	steak	fruits/legumes	New-oldGist	meaningfull	1	r	s	r	139	313	139	gist442_2	120	R-gist	0	1	4			r	8	8	MF_N_oldGist_120_1
P03	0 immédiat	animal4	champigon	animal	New-oldGist	meaningfull	2	r	s	r	164	482	164	gist004_1	120	R-gist	0	1	4			r	8	8	MF_N_oldGist_120_2
P03	0 immédiat	animal43	chameau	animal	New-oldGist	meaningfull	2	z	l	z	396	488	396	gist043_2	120	R-gist	1	0	2	z	3			3	MF_N_oldGist_120_2
P03	0 immédiat	animal76	paon	animal	New-oldGist	meaningfull	2	z	l	z	211	563	211	gist076_2	120	R-gist	1	0	2	z	3			3	MF_N_oldGist_120_2
P03	0 immédiat	paysage9	montagne eneige	paysage	New-oldGist	meaningfull	2	e	s	e	172	947	172	gist109_2	120	R-gist	0	1	3			e	7	7	MF_N_oldGist_120_2
P03	0 immédiat	paysage25	route	paysage	New-oldGist	meaningfull	2	e	s	e	484	402	484	gist125_6	120	R-gist	0	1	3			e	7	7	MF_N_oldGist_120_2
P03	0 immédiat	paysage30	grotte	paysage	New-oldGist	meaningfull	2	r	s	r	100	493	100	gist130_2	120	R-gist	0	1	4			r	8	8	MF_N_oldGist_120_2
P03	0 immédiat	objet isole12	pinceau	objet isole	New-oldGist	meaningfull	2	e	l	e	188	290	188	gist161_2	120	R-gist	1	0	3	e	2			2	MF_N_oldGist_120_2
P03	0 immédiat	fuit/legumes isoles6	noix de coco	fruits/legumes	New-oldGist	meaningfull	2	e	s	e	76	291	76	gist406_1	120	R-gist	0	1	3			e	7	7	MF_N_oldGist_120_2
P03	0 immédiat	fuit/legumes isoles37	pÃªche	fruits/legumes	New-oldGist	meaningfull	2	e	s	e	108	343	108	gist437_3	120	R-gist	0	1	3			e	7	7	MF_N_oldGist_120_2
P03	0 immédiat	fuit/legumes isoles49	kaki	fruits/legumes	New-oldGist	meaningfull	2	r	s	r	228	442	228	gist449_2	120	R-gist	0	1	4			r	8	8	MF_N_oldGist_120_2
P03	0 immédiat	animal3	sauterelle	animal	New-oldGist	meaningfull	1	z	l	z	364	900	364	gist003_1	1920	R-gist	1	0	2	z	3			3	MF_N_oldGist_1920_1
P03	0 immédiat	animal39	cheval	animal	New-oldGist	meaningfull	1	e	s	e	172	340	172	gist039_1	1920	R-gist	0	1	3			e	7	7	MF_N_oldGist_1920_1
P03	0 immédiat	animal75	perroquet	animal	New-oldGist	meaningfull	1	r	s	r	995	2147	995	gist075_2	1920	R-gist	0	1	4			r	8	8	MF_N_oldGist_1920_1
P03	0 immédiat	paysage8	grand canyon	paysage	New-oldGist	meaningfull	1	z	s	z	204	1429	204	gist108_2	1920	R-gist	0	1	2			z	6	6	MF_N_oldGist_1920_1
P03	0 immédiat	paysage23	cascade	paysage	New-oldGist	meaningfull	1	e	s	e	83	352	83	gist123_2	1920	R-gist	0	1	3			e	7	7	MF_N_oldGist_1920_1
P03	0 immédiat	paysage28	farwest	paysage	New-oldGist	meaningfull	1	r	s	r	588	403	588	gist128_2	1920	R-gist	0	1	4			r	8	8	MF_N_oldGist_1920_1
P03	0 immédiat	objet isole10	marteau	objet isole	New-oldGist	meaningfull	1	e	s	e	139	439	139	gist159_2	1920	R-gist	0	1	3			e	7	7	MF_N_oldGist_1920_1
P03	0 immédiat	fuit/legumes isoles4	banane	fruits/legumes	New-oldGist	meaningfull	1	e	s	e	195	531	195	gist404_3	1920	R-gist	0	1	3			e	7	7	MF_N_oldGist_1920_1
P03	0 immédiat	fuit/legumes isoles27	pain	fruits/legumes	New-oldGist	meaningfull	1	e	s	e	156	315	156	gist427_2	1920	R-gist	0	1	3			e	7	7	MF_N_oldGist_1920_1
P03	0 immédiat	fuit/legumes isoles46	Å“uf	fruits/legumes	New-oldGist	meaningfull	1	e	s	e	68	349	68	gist447_2	1920	R-gist	0	1	3			e	7	7	MF_N_oldGist_1920_1
P03	0 immédiat	animal15	poisson	animal	New-oldGist	meaningfull	2	r	s	r	100	349	100	gist015_2	1920	R-gist	0	1	4			r	8	8	MF_N_oldGist_1920_2
P03	0 immédiat	animal47	chevre	animal	New-oldGist	meaningfull	2	r	s	r	123	355	123	gist047_2	1920	R-gist	0	1	4			r	8	8	MF_N_oldGist_1920_2
P03	0 immédiat	animal78	casoar	animal	New-oldGist	meaningfull	2	z	l	z	652	1288	652	gist078_2	1920	R-gist	1	0	2	z	3			3	MF_N_oldGist_1920_2
P03	0 immédiat	paysage15	fond marin	paysage	New-oldGist	meaningfull	2	r	s	r	147	1168	147	gist115_2	1920	R-gist	0	1	4			r	8	8	MF_N_oldGist_1920_2
P03	0 immédiat	paysage25	route	paysage	New-oldGist	meaningfull	2	e	l	e	339	875	339	gist125_7	1920	R-gist	1	0	3	e	2			2	MF_N_oldGist_1920_2
P03	0 immédiat	objet isole1	balle	objet isole	New-oldGist	meaningfull	2	r	l	r	308	214	308	gist151_2	1920	R-gist	1	0	4	r	1			1	MF_N_oldGist_1920_2
P03	0 immédiat	objet isole17	compa	objet isole	New-oldGist	meaningfull	2	r	s	r	148	343	148	gist166_2	1920	R-gist	0	1	4			r	8	8	MF_N_oldGist_1920_2
P03	0 immédiat	fuit/legumes isoles22	mais	fruits/legumes	New-oldGist	meaningfull	2	r	s	r	244	1008	244	gist422_3	1920	R-gist	0	1	4			r	8	8	MF_N_oldGist_1920_2
P03	0 immédiat	fuit/legumes isoles38	brocoli	fruits/legumes	New-oldGist	meaningfull	2	r	s	r	100	302	100	gist438_3	1920	R-gist	0	1	4			r	8	8	MF_N_oldGist_1920_2
P03	0 immédiat	fuit/legumes isoles57	pizza	fruits/legumes	New-oldGist	meaningfull	2	r	s	r	180	351	180	gist459_2	1920	R-gist	0	1	4			r	8	8	MF_N_oldGist_1920_2
P03	0 immédiat	animal11	varan	animal	New	meaningfull	0	r	s	r	612	513	612	gist011_1		R-newgist	0	1	4			r	8	8	MF_new
P03	0 immédiat	animal12	punaise	animal	New	meaningfull	0	z	s	z	148	800	148	gist012_1		R-newgist	0	1	2			z	6	6	MF_new
P03	0 immédiat	animal14	libellule	animal	New	meaningfull	0	r	s	r	91	382	91	gist014_1		R-newgist	0	1	4			r	8	8	MF_new
P03	0 immédiat	animal19	orque	animal	New	meaningfull	0	z	s	z	148	1187	148	gist019_1		R-newgist	0	1	2			z	6	6	MF_new
P03	0 immédiat	animal23	buffle	animal	New	meaningfull	0	e	l	e	660	441	660	gist023_1		R-newgist	1	0	3	e	2			2	MF_new
P03	0 immédiat	animal24	hippopotame	animal	New	meaningfull	0	r	s	r	100	284	100	gist024_1		R-newgist	0	1	4			r	8	8	MF_new
P03	0 immédiat	animal32	renard	animal	New	meaningfull	0	z	l	z	420	639	420	gist032_1		R-newgist	1	0	2	z	3			3	MF_new
P03	0 immédiat	animal34	lion	animal	New	meaningfull	0	z	l	z	140	5612	140	gist034_4		R-newgist	1	0	2	z	3			3	MF_new
P03	0 immédiat	animal36	chat	animal	New	meaningfull	0	r	s	r	436	2625	436	gist036_2		R-newgist	0	1	4			r	8	8	MF_new
P03	0 immédiat	animal46	leopard	animal	New	meaningfull	0	e	s	e	156	796	156	gist046_2		R-newgist	0	1	3			e	7	7	MF_new
P03	0 immédiat	animal120	blereau	animal	New	meaningfull	0	e	s	e	180	397	180	gist050_2		R-newgist	0	1	3			e	7	7	MF_new
P03	0 immédiat	animal55	singe	animal	New	meaningfull	0	r	s	r	164	509	164	gist055_1		R-newgist	0	1	4			r	8	8	MF_new
P03	0 immédiat	animal66	autruche	animal	New	meaningfull	0	e	s	e	564	652	564	gist066_1		R-newgist	0	1	3			e	7	7	MF_new
P03	0 immédiat	animal69	oiseau	animal	New	meaningfull	0	e	s	e	164	308	164	gist069_1		R-newgist	0	1	3			e	7	7	MF_new
P03	0 immédiat	animal71	oie	animal	New	meaningfull	0	r	s	r	164	334	164	gist071_1		R-newgist	0	1	4			r	8	8	MF_new
P03	0 immédiat	animal72	oiseau2	animal	New	meaningfull	0	e	s	e	75	383	75	gist072_1		R-newgist	0	1	3			e	7	7	MF_new
P03	0 immédiat	paysage5	coucher de soleil	paysage	New	meaningfull	0	z	s	z	252	551	252	gist105_1		R-newgist	0	1	2			z	6	6	MF_new
P03	0 immédiat	paysage7	foret	paysage	New	meaningfull	0	z	s	z	924	1561	924	gist107_2		R-newgist	0	1	2			z	6	6	MF_new
P03	0 immédiat	paysage10	montagne	paysage	New	meaningfull	0	e	s	e	331	1054	331	gist110_1		R-newgist	0	1	3			e	7	7	MF_new
P03	0 immédiat	paysage18	neige	paysage	New	meaningfull	0	e	s	e	76	636	76	gist118_1		R-newgist	0	1	3			e	7	7	MF_new
P03	0 immédiat	paysage22	mer/montagne	paysage	New	meaningfull	0	e	s	e	188	456	188	gist122_1		R-newgist	0	1	3			e	7	7	MF_new
P03	0 immédiat	paysage26	desert	paysage	New	meaningfull	0	r	s	r	660	1136	660	gist126_1		R-newgist	0	1	4			r	8	8	MF_new
P03	0 immédiat	objet isole7	trombone	objet isole	New	meaningfull	0	e	s	e	476	1671	476	gist157_1		R-newgist	0	1	3			e	7	7	MF_new
P03	0 immédiat	objet isole9	fil	objet isole	New	meaningfull	0	e	s	e	156	1250	156	gist158_1		R-newgist	0	1	3			e	7	7	MF_new
P03	0 immédiat	objet isole15	crayon	objet isole	New	meaningfull	0	z	l	z	739	1046	739	gist164_1		R-newgist	1	0	2	z	3			3	MF_new
P03	0 immédiat	objet isole27	pioche	objet isole	New	meaningfull	0	r	s	r	132	314	132	gist176_1		R-newgist	0	1	4			r	8	8	MF_new
P03	0 immédiat	objet isole29	mÃ¨che	objet isole	New	meaningfull	0	e	s	e	1268	980	1268	gist178_1		R-newgist	0	1	3			e	7	7	MF_new
P03	0 immédiat	objet isole30	niveau	objet isole	New	meaningfull	0	r	s	r	20	293	20	gist179_1		R-newgist	0	1	4			r	8	8	MF_new
P03	0 immédiat	fuit/legumes isoles11	kiwi	fruits/legumes	New	meaningfull	0	z	l	z	660	1558	660	gist411_1		R-newgist	1	0	2	z	3			3	MF_new
P03	0 immédiat	fuit/legumes isoles13	citron vert	fruits/legumes	New	meaningfull	0	z	l	z	635	550	635	gist413_1		R-newgist	1	0	2	z	3			3	MF_new
P03	0 immédiat	fuit/legumes isoles15	amande	fruits/legumes	New	meaningfull	0	r	s	r	132	318	132	gist415_2		R-newgist	0	1	4			r	8	8	MF_new
P03	0 immédiat	fuit/legumes isoles16	litchi	fruits/legumes	New	meaningfull	0	e	s	e	196	482	196	gist416_1		R-newgist	0	1	3			e	7	7	MF_new
P03	0 immédiat	fuit/legumes isoles17	melon	fruits/legumes	New	meaningfull	0	e	l	e	500	920	500	gist417_1		R-newgist	1	0	3	e	2			2	MF_new
P03	0 immédiat	fuit/legumes isoles20	courgette	fruits/legumes	New	meaningfull	0	e	l	e	604	1876	604	gist420_1		R-newgist	1	0	3	e	2			2	MF_new
P03	0 immédiat	fuit/legumes isoles21	framboise	fruits/legumes	New	meaningfull	0	z	s	z	300	778	300	gist421_1		R-newgist	0	1	2			z	6	6	MF_new
P03	0 immédiat	fuit/legumes isoles23	gateau	fruits/legumes	New	meaningfull	0	r	s	r	123	752	123	gist423_2		R-newgist	0	1	4			r	8	8	MF_new
P03	0 immédiat	fuit/legumes isoles24	hotdog	fruits/legumes	New	meaningfull	0	r	s	r	91	392	91	gist424_2		R-newgist	0	1	4			r	8	8	MF_new
P03	0 immédiat	fuit/legumes isoles35	patate	fruits/legumes	New	meaningfull	0	z	l	z	636	627	636	gist435_2		R-newgist	1	0	2	z	3			3	MF_new
P03	0 immédiat	fuit/legumes isoles44	noisette	fruits/legumes	New	meaningfull	0	e	s	e	204	286	204	gist444_2		R-newgist	0	1	3			e	7	7	MF_new
P03	0 immédiat	fuit/legumes isoles48	figue	fruits/legumes	New	meaningfull	0	z	s	z	188	479	188	gist448_3		R-newgist	0	1	2			z	6	6	MF_new
P03	0 immédiat	meaningless091	meanigless	meanigless	New	meaningless	0	z	s	z	156	514	156	Image0007		New	0	1	2			z	6	6	ML_new
P03	0 immédiat	meaningless109	meanigless	meanigless	New	meaningless	0	z	l	z	2012	472	2012	Image0008		New	1	0	2	z	3			3	ML_new
P03	0 immédiat	meaningless127	meanigless	meanigless	New	meaningless	0	e	s	e	1363	1214	1363	Image0011		New	0	1	3			e	7	7	ML_new
P03	0 immédiat	meaningless159	meanigless	meanigless	New	meaningless	0	z	s	z	164	789	164	Image0016		New	0	1	2			z	6	6	ML_new
P03	0 immédiat	meaningless145	meanigless	meanigless	New	meaningless	0	e	s	e	116	425	116	Image0069		New	0	1	3			e	7	7	ML_new
P03	0 immédiat	meaningless092	meanigless	meanigless	New	meaningless	0	z	s	z	164	3131	164	Image0084		New	0	1	2			z	6	6	ML_new
P03	0 immédiat	meaningless110	meanigless	meanigless	New	meaningless	0	e	s	e	155	850	155	Image0085		New	0	1	3			e	7	7	ML_new
P03	0 immédiat	meaningless141	meanigless	meanigless	New	meaningless	0	z	s	z	195	863	195	Image0086		New	0	1	2			z	6	6	ML_new
P03	0 immédiat	meaningless160	meanigless	meanigless	New	meaningless	0	e	l	e	2124	1262	2124	Image0089		New	1	0	3	e	2			2	ML_new
P03	0 immédiat	meaningless146	meanigless	meanigless	New	meaningless	0	z	s	z	308	579	308	Image0103		New	0	1	2			z	6	6	ML_new
P03	0 immédiat	meaningless093	meanigless	meanigless	New	meaningless	0	e	s	e	204	871	204	Image0119		New	0	1	3			e	7	7	ML_new
P03	0 immédiat	meaningless111	meanigless	meanigless	New	meaningless	0	e	l	e	188	399	188	Image0122		New	1	0	3	e	2			2	ML_new
P03	0 immédiat	meaningless128	meanigless	meanigless	New	meaningless	0	e	s	e	139	1753	139	Image0123		New	0	1	3			e	7	7	ML_new
P03	0 immédiat	meaningless147	meanigless	meanigless	New	meaningless	0	e	l	e	452	1123	452	Image0155		New	1	0	3	e	2			2	ML_new
P03	0 immédiat	meaningless094	meanigless	meanigless	New	meaningless	0	z	s	z	228	1274	228	Image0171		New	0	1	2			z	6	6	ML_new
P03	0 immédiat	meaningless112	meanigless	meanigless	New	meaningless	0	e	s	e	204	646	204	Image0172		New	0	1	3			e	7	7	ML_new
P03	0 immédiat	meaningless129	meanigless	meanigless	New	meaningless	0	z	l	z	132	375	132	Image0174		New	1	0	2	z	3			3	ML_new
P03	0 immédiat	meaningless105	meanigless	meanigless	New	meaningless	0	z	s	z	2052	3072	2052	Image0201		New	0	1	2			z	6	6	ML_new
P03	0 immédiat	meaningless123	meanigless	meanigless	New	meaningless	0	r	s	r	156	389	156	Image0202		New	0	1	4			r	8	8	ML_new
P03	0 immédiat	meaningless148	meanigless	meanigless	New	meaningless	0	z	l	z	516	622	516	Image0214		New	1	0	2	z	3			3	ML_new
P03	0 immédiat	meaningless095	meanigless	meanigless	New	meaningless	0	z	l	z	284	2582	284	Image0235		New	1	0	2	z	3			3	ML_new
P03	0 immédiat	meaningless124	meanigless	meanigless	New	meaningless	0	z	s	z	148	328	148	Image0239		New	0	1	2			z	6	6	ML_new
P03	0 immédiat	meaningless130	meanigless	meanigless	New	meaningless	0	z	l	z	132	878	132	Image0240		New	1	0	2	z	3			3	ML_new
P03	0 immédiat	meaningless149	meanigless	meanigless	New	meaningless	0	e	s	e	172	455	172	Image0340		New	0	1	3			e	7	7	ML_new
P03	0 immédiat	meaningless087	meanigless	meanigless	New	meaningless	0	e	l	e	132	375	132	Image0381		New	1	0	3	e	2			2	ML_new
P03	0 immédiat	meaningless096	meanigless	meanigless	New	meaningless	0	e	s	e	132	314	132	Image0386		New	0	1	3			e	7	7	ML_new
P03	0 immédiat	meaningless113	meanigless	meanigless	New	meaningless	0	z	s	z	204	1543	204	Image0402		New	0	1	2			z	6	6	ML_new
P03	0 immédiat	meaningless131	meanigless	meanigless	New	meaningless	0	a	s	a	196	412	196	Image0403		New	0	1	1			a	5	5	ML_new
P03	0 immédiat	meaningless097	meanigless	meanigless	New	meaningless	0	z	l	z	124	371	124	Image0456		New	1	0	2	z	3			3	ML_new
P03	0 immédiat	meaningless114	meanigless	meanigless	New	meaningless	0	z	s	z	91	361	91	Image0457		New	0	1	2			z	6	6	ML_new
P03	0 immédiat	meaningless132	meanigless	meanigless	New	meaningless	0	z	l	z	172	322	172	Image0458		New	1	0	2	z	3			3	ML_new
P03	0 immédiat	meaningless150	meanigless	meanigless	New	meaningless	0	e	s	e	339	1400	339	Image0476		New	0	1	3			e	7	7	ML_new
P03	0 immédiat	meaningless098	meanigless	meanigless	New	meaningless	0	r	s	r	116	409	116	Image0486		New	0	1	4			r	8	8	ML_new
P03	0 immédiat	meaningless115	meanigless	meanigless	New	meaningless	0	e	s	e	876	3593	876	Image0487		New	0	1	3			e	7	7	ML_new
P03	0 immédiat	meaningless133	meanigless	meanigless	New	meaningless	0	a	s	a	1060	3391	1060	Image0488		New	0	1	1			a	5	5	ML_new
P03	0 immédiat	meaningless151	meanigless	meanigless	New	meaningless	0	z	s	z	148	296	148	Image0609		New	0	1	2			z	6	6	ML_new
P03	0 immédiat	meaningless099	meanigless	meanigless	New	meaningless	0	e	l	e	212	106	212	Image0617		New	1	0	3	e	2			2	ML_new
P03	0 immédiat	meaningless116	meanigless	meanigless	New	meaningless	0	e	l	e	156	652	156	Image0618		New	1	0	3	e	2			2	ML_new
P03	0 immédiat	meaningless134	meanigless	meanigless	New	meaningless	0	e	s	e	220	688	220	Image0619		New	0	1	3			e	7	7	ML_new
P03	0 immédiat	meaningless088	meanigless	meanigless	New	meaningless	0	z	s	z	661	1252	661	Image0630		New	0	1	2			z	6	6	ML_new
P03	0 immédiat	meaningless152	meanigless	meanigless	New	meaningless	0	z	l	z	284	1968	284	Image0635		New	1	0	2	z	3			3	ML_new
P03	0 immédiat	meaningless081	meanigless	meanigless	New	meaningless	0	e	s	e	212	1484	212	Image0643		New	0	1	3			e	7	7	ML_new
P03	0 immédiat	meaningless100	meanigless	meanigless	New	meaningless	0	e	s	e	84	416	84	Image0644		New	0	1	3			e	7	7	ML_new
P03	0 immédiat	meaningless117	meanigless	meanigless	New	meaningless	0	e	s	e	276	1732	276	Image0645		New	0	1	3			e	7	7	ML_new
P03	0 immédiat	meaningless135	meanigless	meanigless	New	meaningless	0	e	l	e	332	1206	332	Image0646		New	1	0	3	e	2			2	ML_new
P03	0 immédiat	meaningless153	meanigless	meanigless	New	meaningless	0	z	l	z	148	448	148	Image0664		New	1	0	2	z	3			3	ML_new
P03	0 immédiat	meaningless082	meanigless	meanigless	New	meaningless	0	e	l	e	132	302	132	Image0671		New	1	0	3	e	2			2	ML_new
P03	0 immédiat	meaningless101	meanigless	meanigless	New	meaningless	0	r	s	r	195	342	195	Image0672		New	0	1	4			r	8	8	ML_new
P03	0 immédiat	meaningless118	meanigless	meanigless	New	meaningless	0	e	s	e	219	391	219	Image0673		New	0	1	3			e	7	7	ML_new
P03	0 immédiat	meaningless136	meanigless	meanigless	New	meaningless	0	z	l	z	140	354	140	Image0674		New	1	0	2	z	3			3	ML_new
P03	0 immédiat	meaningless154	meanigless	meanigless	New	meaningless	0	e	l	e	108	335	108	Image0691		New	1	0	3	e	2			2	ML_new
P03	0 immédiat	meaningless083	meanigless	meanigless	New	meaningless	0	r	s	r	148	380	148	Image0698		New	0	1	4			r	8	8	ML_new
P03	0 immédiat	meaningless102	meanigless	meanigless	New	meaningless	0	z	s	z	820	967	820	Image0701		New	0	1	2			z	6	6	ML_new
P03	0 immédiat	meaningless119	meanigless	meanigless	New	meaningless	0	z	s	z	204	931	204	Image0702		New	0	1	2			z	6	6	ML_new
P03	0 immédiat	meaningless137	meanigless	meanigless	New	meaningless	0	z	s	z	163	301	163	Image0704		New	0	1	2			z	6	6	ML_new
P03	0 immédiat	meaningless155	meanigless	meanigless	New	meaningless	0	z	s	z	180	471	180	Image0896		New	0	1	2			z	6	6	ML_new
P03	0 immédiat	meaningless084	meanigless	meanigless	New	meaningless	0	z	s	z	1692	983	1692	Image0932		New	0	1	2			z	6	6	ML_new
P03	0 immédiat	meaningless103	meanigless	meanigless	New	meaningless	0	z	s	z	165	384	165	Image0933		New	0	1	2			z	6	6	ML_new
P03	0 immédiat	meaningless120	meanigless	meanigless	New	meaningless	0	e	l	e	116	339	116	Image1001		New	1	0	3	e	2			2	ML_new
P03	0 immédiat	meaningless138	meanigless	meanigless	New	meaningless	0	z	l	z	2524	948	2524	Image1101		New	1	0	2	z	3			3	ML_new
P03	0 immédiat	meaningless156	meanigless	meanigless	New	meaningless	0	r	s	r	132	378	132	Image1207		New	0	1	4			r	8	8	ML_new
P03	0 immédiat	meaningless085	meanigless	meanigless	New	meaningless	0	z	l	z	148	516	148	Image1215		New	1	0	2	z	3			3	ML_new
P03	0 immédiat	meaningless106	meanigless	meanigless	New	meaningless	0	z	s	z	292	839	292	Image1216		New	0	1	2			z	6	6	ML_new
P03	0 immédiat	meaningless121	meanigless	meanigless	New	meaningless	0	a	s	a	212	426	212	Image1217		New	0	1	1			a	5	5	ML_new
P03	0 immédiat	meaningless139	meanigless	meanigless	New	meaningless	0	z	s	z	419	1968	419	Image1218		New	0	1	2			z	6	6	ML_new
P03	0 immédiat	meaningless142	meanigless	meanigless	New	meaningless	0	e	s	e	100	374	100	Image1232		New	0	1	3			e	7	7	ML_new
P03	0 immédiat	meaningless157	meanigless	meanigless	New	meaningless	0	z	l	z	4300	1616	4300	Image1234		New	1	0	2	z	3			3	ML_new
P03	0 immédiat	meaningless086	meanigless	meanigless	New	meaningless	0	r	s	r	236	1401	236	Image1245		New	0	1	4			r	8	8	ML_new
P03	0 immédiat	meaningless104	meanigless	meanigless	New	meaningless	0	r	l	r	164	454	164	Image1246		New	1	0	4	r	1			1	ML_new
P03	0 immédiat	meaningless122	meanigless	meanigless	New	meaningless	0	z	l	z	156	649	156	Image1247		New	1	0	2	z	3			3	ML_new
P03	0 immédiat	meaningless140	meanigless	meanigless	New	meaningless	0	e	s	e	292	2244	292	Image1250		New	0	1	3			e	7	7	ML_new
P03	0 immédiat	meaningless158	meanigless	meanigless	New	meaningless	0	z	s	z	140	1583	140	Image1273		New	0	1	2			z	6	6	ML_new
P03	0 immédiat	meaningless089	meanigless	meanigless	New	meaningless	0	z	s	z	196	332	196	R17		New	0	1	2			z	6	6	ML_new
P03	0 immédiat	meaningless107	meanigless	meanigless	New	meaningless	0	e	s	e	219	482	219	R18		New	0	1	3			e	7	7	ML_new
P03	0 immédiat	meaningless125	meanigless	meanigless	New	meaningless	0	e	l	e	1044	522	1044	R19		New	1	0	3	e	2			2	ML_new
P03	0 immédiat	meaningless143	meanigless	meanigless	New	meaningless	0	z	l	z	3308	1158	3308	R20		New	1	0	2	z	3			3	ML_new
P03	0 immédiat	meaningless090	meanigless	meanigless	New	meaningless	0	z	l	z	1780	670	1780	R5		New	1	0	2	z	3			3	ML_new
P03	0 immédiat	meaningless108	meanigless	meanigless	New	meaningless	0	r	l	r	164	344	164	R6		New	1	0	4	r	1			1	ML_new
P03	0 immédiat	meaningless126	meanigless	meanigless	New	meaningless	0	e	l	e	115	593	115	R7		New	1	0	3	e	2			2	ML_new
P03	0 immédiat	meaningless144	meanigless	meanigless	New	meaningless	0	z	s	z	852	3987	852	R8		New	0	1	2			z	6	6	ML_new
P03	0 immédiat	meaningless177	meanigless	meanigless	Old	meaningless	1	e	s	e	148	2539	148	Image0070	120	Old	0	1	3			e	7	7	ML_old_120_1
P03	0 immédiat	meaningless209	meanigless	meanigless	Old	meaningless	1	z	l	z	140	260	140	Image0071	120	Old	1	0	2	z	3			3	ML_old_120_1
P03	0 immédiat	meaningless161	meanigless	meanigless	Old	meaningless	1	z	l	z	572	899	572	Image0128	120	Old	1	0	2	z	3			3	ML_old_120_1
P03	0 immédiat	meaningless225	meanigless	meanigless	Old	meaningless	1	z	l	z	364	330	364	Image0132	120	Old	1	0	2	z	3			3	ML_old_120_1
P03	0 immédiat	meaningless193	meanigless	meanigless	Old	meaningless	1	z	s	z	220	1684	220	Image0178	120	Old	0	1	2			z	6	6	ML_old_120_1
P03	0 immédiat	meaningless181	meanigless	meanigless	Old	meaningless	1	z	l	z	1284	1160	1284	Image0344	120	Old	1	0	2	z	3			3	ML_old_120_1
P03	0 immédiat	meaningless213	meanigless	meanigless	Old	meaningless	1	z	s	z	92	312	92	Image0348	120	Old	0	1	2			z	6	6	ML_old_120_1
P03	0 immédiat	meaningless173	meanigless	meanigless	Old	meaningless	1	z	l	z	260	418	260	Image0425	120	Old	1	0	2	z	3			3	ML_old_120_1
P03	0 immédiat	meaningless237	meanigless	meanigless	Old	meaningless	1	z	s	z	188	1629	188	Image0427	120	Old	0	1	2			z	6	6	ML_old_120_1
P03	0 immédiat	meaningless165	meanigless	meanigless	Old	meaningless	1	e	l	e	100	381	100	Image0461	120	Old	1	0	3	e	2			2	ML_old_120_1
P03	0 immédiat	meaningless229	meanigless	meanigless	Old	meaningless	1	r	l	r	148	406	148	Image0465	120	Old	1	0	4	r	1			1	ML_old_120_1
P03	0 immédiat	meaningless206	meanigless	meanigless	Old	meaningless	1	e	s	e	84	298	84	Image0477	120	Old	0	1	3			e	7	7	ML_old_120_1
P03	0 immédiat	meaningless197	meanigless	meanigless	Old	meaningless	1	r	l	r	133	303	133	Image0501	120	Old	1	0	4	r	1			1	ML_old_120_1
P03	0 immédiat	meaningless185	meanigless	meanigless	Old	meaningless	1	e	l	e	148	341	148	Image0665	120	Old	1	0	3	e	2			2	ML_old_120_1
P03	0 immédiat	meaningless217	meanigless	meanigless	Old	meaningless	1	r	l	r	460	732	460	Image0666	120	Old	1	0	4	r	1			1	ML_old_120_1
P03	0 immédiat	meaningless169	meanigless	meanigless	Old	meaningless	1	e	s	e	108	1223	108	Image0676	120	Old	0	1	3			e	7	7	ML_old_120_1
P03	0 immédiat	meaningless233	meanigless	meanigless	Old	meaningless	1	e	l	e	1572	1307	1572	Image0785	120	Old	1	0	3	e	2			2	ML_old_120_1
P03	0 immédiat	meaningless202	meanigless	meanigless	Old	meaningless	1	z	l	z	444	638	444	Image1104	120	Old	1	0	2	z	3			3	ML_old_120_1
P03	0 immédiat	meaningless189	meanigless	meanigless	Old	meaningless	1	e	l	e	356	664	356	Image1235	120	Old	1	0	3	e	2			2	ML_old_120_1
P03	0 immédiat	meaningless221	meanigless	meanigless	Old	meaningless	1	e	s	e	1060	1410	1060	Image1236	120	Old	0	1	3			e	7	7	ML_old_120_1
P03	0 immédiat	meaningless191	meanigless	meanigless	Old	meaningless	2	e	s	e	148	3428	148	Image0017	120	Old	0	1	3			e	7	7	ML_old_120_2
P03	0 immédiat	meaningless223	meanigless	meanigless	Old	meaningless	2	e	l	e	132	346	132	Image0018	120	Old	1	0	3	e	2			2	ML_old_120_2
P03	0 immédiat	meaningless179	meanigless	meanigless	Old	meaningless	2	e	s	e	115	654	115	Image0157	120	Old	0	1	3			e	7	7	ML_old_120_2
P03	0 immédiat	meaningless211	meanigless	meanigless	Old	meaningless	2	e	s	e	105	2347	105	Image0162	120	Old	0	1	3			e	7	7	ML_old_120_2
P03	0 immédiat	meaningless163	meanigless	meanigless	Old	meaningless	2	e	l	e	140	363	140	Image0242	120	Old	1	0	3	e	2			2	ML_old_120_2
P03	0 immédiat	meaningless227	meanigless	meanigless	Old	meaningless	2	z	l	z	532	1053	532	Image0246	120	Old	1	0	2	z	3			3	ML_old_120_2
P03	0 immédiat	meaningless195	meanigless	meanigless	Old	meaningless	2	z	l	z	164	500	164	Image0412	120	Old	1	0	2	z	3			3	ML_old_120_2
P03	0 immédiat	meaningless183	meanigless	meanigless	Old	meaningless	2	r	l	r	124	331	124	Image0610	120	Old	1	0	4	r	1			1	ML_old_120_2
P03	0 immédiat	meaningless215	meanigless	meanigless	Old	meaningless	2	z	s	z	1364	2203	1364	Image0611	120	Old	0	1	2			z	6	6	ML_old_120_2
P03	0 immédiat	meaningless167	meanigless	meanigless	Old	meaningless	2	z	s	z	172	1042	172	Image0621	120	Old	0	1	2			z	6	6	ML_old_120_2
P03	0 immédiat	meaningless231	meanigless	meanigless	Old	meaningless	2	z	s	z	1139	505	1139	Image0623	120	Old	0	1	2			z	6	6	ML_old_120_2
P03	0 immédiat	meaningless199	meanigless	meanigless	Old	meaningless	2	e	l	e	164	282	164	Image0651	120	Old	1	0	3	e	2			2	ML_old_120_2
P03	0 immédiat	meaningless187	meanigless	meanigless	Old	meaningless	2	e	s	e	211	444	211	Image0897	120	Old	0	1	3			e	7	7	ML_old_120_2
P03	0 immédiat	meaningless219	meanigless	meanigless	Old	meaningless	2	r	s	r	140	363	140	Image0916	120	Old	0	1	4			r	8	8	ML_old_120_2
P03	0 immédiat	meaningless171	meanigless	meanigless	Old	meaningless	2	z	l	z	813	259	813	Image1103	120	Old	1	0	2	z	3			3	ML_old_120_2
P03	0 immédiat	meaningless235	meanigless	meanigless	Old	meaningless	2	r	l	r	173	411	173	Image1222	120	Old	1	0	4	r	1			1	ML_old_120_2
P03	0 immédiat	meaningless204	meanigless	meanigless	Old	meaningless	2	e	l	e	156	303	156	Image1253	120	Old	1	0	3	e	2			2	ML_old_120_2
P03	0 immédiat	meaningless175	meanigless	meanigless	Old	meaningless	2	z	s	z	220	1210	220	R10	120	Old	0	1	2			z	6	6	ML_old_120_2
P03	0 immédiat	meaningless239	meanigless	meanigless	Old	meaningless	2	e	l	e	132	373	132	R12	120	Old	1	0	3	e	2			2	ML_old_120_2
P03	0 immédiat	meaningless208	meanigless	meanigless	Old	meaningless	2	e	s	e	1748	524	1748	R23	120	Old	0	1	3			e	7	7	ML_old_120_2
P03	0 immédiat	meaningless178	meanigless	meanigless	Old	meaningless	1	e	l	e	156	376	156	Image0107	1920	Old	1	0	3	e	2			2	ML_old_1920_1
P03	0 immédiat	meaningless210	meanigless	meanigless	Old	meaningless	1	e	s	e	524	1144	524	Image0108	1920	Old	0	1	3			e	7	7	ML_old_1920_1
P03	0 immédiat	meaningless205	meanigless	meanigless	Old	meaningless	1	e	l	e	156	380	156	Image0129	1920	Old	1	0	3	e	2			2	ML_old_1920_1
P03	0 immédiat	meaningless162	meanigless	meanigless	Old	meaningless	1	r	l	r	148	430	148	Image0176	1920	Old	1	0	4	r	1			1	ML_old_1920_1
P03	0 immédiat	meaningless226	meanigless	meanigless	Old	meaningless	1	e	l	e	180	1231	180	Image0179	1920	Old	1	0	3	e	2			2	ML_old_1920_1
P03	0 immédiat	meaningless194	meanigless	meanigless	Old	meaningless	1	e	l	e	780	1477	780	Image0243	1920	Old	1	0	3	e	2			2	ML_old_1920_1
P03	0 immédiat	meaningless182	meanigless	meanigless	Old	meaningless	1	e	l	e	116	431	116	Image0426	1920	Old	1	0	3	e	2			2	ML_old_1920_1
P03	0 immédiat	meaningless214	meanigless	meanigless	Old	meaningless	1	r	l	r	108	391	108	Image0478	1920	Old	1	0	4	r	1			1	ML_old_1920_1
P03	0 immédiat	meaningless166	meanigless	meanigless	Old	meaningless	1	e	l	e	372	948	372	Image0494	1920	Old	1	0	3	e	2			2	ML_old_1920_1
P03	0 immédiat	meaningless230	meanigless	meanigless	Old	meaningless	1	z	s	z	204	1927	204	Image0542	1920	Old	0	1	2			z	6	6	ML_old_1920_1
P03	0 immédiat	meaningless198	meanigless	meanigless	Old	meaningless	1	z	l	z	436	506	436	Image0622	1920	Old	1	0	2	z	3			3	ML_old_1920_1
P03	0 immédiat	meaningless238	meanigless	meanigless	Old	meaningless	1	e	l	e	452	1291	452	Image0680	1920	Old	1	0	3	e	2			2	ML_old_1920_1
P03	0 immédiat	meaningless186	meanigless	meanigless	Old	meaningless	1	r	l	r	147	478	147	Image0692	1920	Old	1	0	4	r	1			1	ML_old_1920_1
P03	0 immédiat	meaningless218	meanigless	meanigless	Old	meaningless	1	e	l	e	244	290	244	Image0693	1920	Old	1	0	3	e	2			2	ML_old_1920_1
P03	0 immédiat	meaningless170	meanigless	meanigless	Old	meaningless	1	z	l	z	179	692	179	Image0760	1920	Old	1	0	2	z	3			3	ML_old_1920_1
P03	0 immédiat	meaningless201	meanigless	meanigless	Old	meaningless	1	r	l	r	917	1050	917	Image0764	1920	Old	1	0	4	r	1			1	ML_old_1920_1
P03	0 immédiat	meaningless234	meanigless	meanigless	Old	meaningless	1	r	l	r	123	357	123	Image1105	1920	Old	1	0	4	r	1			1	ML_old_1920_1
P03	0 immédiat	meaningless174	meanigless	meanigless	Old	meaningless	1	r	l	r	228	785	228	Image1252	1920	Old	1	0	4	r	1			1	ML_old_1920_1
P03	0 immédiat	meaningless190	meanigless	meanigless	Old	meaningless	1	e	l	e	756	579	756	Image1274	1920	Old	1	0	3	e	2			2	ML_old_1920_1
P03	0 immédiat	meaningless222	meanigless	meanigless	Old	meaningless	1	r	l	r	348	3010	348	Image1277	1920	Old	1	0	4	r	1			1	ML_old_1920_1
P03	0 immédiat	meaningless192	meanigless	meanigless	Old	meaningless	2	e	l	e	92	360	92	Image0090	1920	Old	1	0	3	e	2			2	ML_old_1920_2
P03	0 immédiat	meaningless224	meanigless	meanigless	Old	meaningless	2	r	l	r	156	280	156	Image0091	1920	Old	1	0	4	r	1			1	ML_old_1920_2
P03	0 immédiat	meaningless180	meanigless	meanigless	Old	meaningless	2	r	l	r	1565	585	1565	Image0215	1920	Old	1	0	4	r	1			1	ML_old_1920_2
P03	0 immédiat	meaningless212	meanigless	meanigless	Old	meaningless	2	r	l	r	316	444	316	Image0220	1920	Old	1	0	4	r	1			1	ML_old_1920_2
P03	0 immédiat	meaningless164	meanigless	meanigless	Old	meaningless	2	e	l	e	139	555	139	Image0411	1920	Old	1	0	3	e	2			2	ML_old_1920_2
P03	0 immédiat	meaningless228	meanigless	meanigless	Old	meaningless	2	r	l	r	212	526	212	Image0413	1920	Old	1	0	4	r	1			1	ML_old_1920_2
P03	0 immédiat	meaningless196	meanigless	meanigless	Old	meaningless	2	r	l	r	132	393	132	Image0462	1920	Old	1	0	4	r	1			1	ML_old_1920_2
P03	0 immédiat	meaningless184	meanigless	meanigless	Old	meaningless	2	r	l	r	204	95	204	Image0636	1920	Old	1	0	4	r	1			1	ML_old_1920_2
P03	0 immédiat	meaningless216	meanigless	meanigless	Old	meaningless	2	r	l	r	148	445	148	Image0637	1920	Old	1	0	4	r	1			1	ML_old_1920_2
P03	0 immédiat	meaningless168	meanigless	meanigless	Old	meaningless	2	e	l	e	156	506	156	Image0649	1920	Old	1	0	3	e	2			2	ML_old_1920_2
P03	0 immédiat	meaningless232	meanigless	meanigless	Old	meaningless	2	e	l	e	164	508	164	Image0652	1920	Old	1	0	3	e	2			2	ML_old_1920_2
P03	0 immédiat	meaningless200	meanigless	meanigless	Old	meaningless	2	r	l	r	132	368	132	Image0677	1920	Old	1	0	4	r	1			1	ML_old_1920_2
P03	0 immédiat	meaningless188	meanigless	meanigless	Old	meaningless	2	r	l	r	148	326	148	Image1208	1920	Old	1	0	4	r	1			1	ML_old_1920_2
P03	0 immédiat	meaningless220	meanigless	meanigless	Old	meaningless	2	r	l	r	132	270	132	Image1209	1920	Old	1	0	4	r	1			1	ML_old_1920_2
P03	0 immédiat	meaningless172	meanigless	meanigless	Old	meaningless	2	r	l	r	164	396	164	Image1220	1920	Old	1	0	4	r	1			1	ML_old_1920_2
P03	0 immédiat	meaningless203	meanigless	meanigless	Old	meaningless	2	r	l	r	428	1635	428	Image1221	1920	Old	1	0	4	r	1			1	ML_old_1920_2
P03	0 immédiat	meaningless236	meanigless	meanigless	Old	meaningless	2	e	l	e	108	337	108	Image1254	1920	Old	1	0	3	e	2			2	ML_old_1920_2
P03	0 immédiat	meaningless207	meanigless	meanigless	Old	meaningless	2	r	l	r	379	573	379	R11	1920	Old	1	0	4	r	1			1	ML_old_1920_2
P03	0 immédiat	meaningless176	meanigless	meanigless	Old	meaningless	2	r	l	r	148	270	148	R22	1920	Old	1	0	4	r	1			1	ML_old_1920_2
P03	0 immédiat	meaningless240	meanigless	meanigless	Old	meaningless	2	r	l	r	180	703	180	R24	1920	Old	1	0	4	r	1			1	ML_old_1920_2
P04	0 immédiat	animal13	chenille	animal	Old	meaningfull	1	r	s	r	572	1086	572	gist013_2	120	Old	0	1	4			r	8	8	MF_old_120_1
P04	0 immédiat	animal22	elephant	animal	Old	meaningfull	1	z	s	z	164	1748	164	gist022_2	120	Old	0	1	2			z	6	6	MF_old_120_1
P04	0 immédiat	animal33	panthÃ¨re	animal	Old	meaningfull	1	r	l	r	257	67	257	gist033_1	120	Old	1	0	4	r	1			1	MF_old_120_1
P04	0 immédiat	animal41	oxyx	animal	Old	meaningfull	1	z	s	z	1220	1569	1220	gist041_2	120	Old	0	1	2			z	6	6	MF_old_120_1
P04	0 immédiat	animal48	ecureuil	animal	Old	meaningfull	1	z	s	z	684	1745	684	gist048_1	120	Old	0	1	2			z	6	6	MF_old_120_1
P04	0 immédiat	animal56	gorille	animal	Old	meaningfull	1	r	s	r	276	1296	276	gist056_1	120	Old	0	1	4			r	8	8	MF_old_120_1
P04	0 immédiat	animal77	flaman rose	animal	Old	meaningfull	1	r	l	r	196	2911	196	gist077_1	120	Old	1	0	4	r	1			1	MF_old_120_1
P04	0 immédiat	paysage4	rocher	paysage	Old	meaningfull	1	r	l	r	268	866	268	gist104_2	120	Old	1	0	4	r	1			1	MF_old_120_1
P04	0 immédiat	paysage16	champ de fleur	paysage	Old	meaningfull	1	r	s	r	844	1685	844	gist116_1	120	Old	0	1	4			r	8	8	MF_old_120_1
P04	0 immédiat	paysage25	route	paysage	Old	meaningfull	1	e	l	e	316	1426	316	gist125_10	120	Old	1	0	3	e	2			2	MF_old_120_1
P04	0 immédiat	objet isole3	brosse Ã dent	objet isole	Old	meaningfull	1	r	l	r	492	819	492	gist153_1	120	Old	1	0	4	r	1			1	MF_old_120_1
P04	0 immédiat	objet isole11	toune_visse	objet isole	Old	meaningfull	1	e	s	e	1099	508	1099	gist160_1	120	Old	0	1	3			e	7	7	MF_old_120_1
P04	0 immédiat	objet isole22	raquette	objet isole	Old	meaningfull	1	e	s	e	508	912	508	gist171_1	120	Old	0	1	3			e	7	7	MF_old_120_1
P04	0 immédiat	objet isole28	cle	objet isole	Old	meaningfull	1	r	l	r	324	958	324	gist177_1	120	Old	1	0	4	r	1			1	MF_old_120_1
P04	0 immédiat	fuit/legumes isoles5	raisin	fruits/legumes	Old	meaningfull	1	e	s	e	220	472	220	gist405_1	120	Old	0	1	3			e	7	7	MF_old_120_1
P04	0 immédiat	fuit/legumes isoles28	cookies	fruits/legumes	Old	meaningfull	1	z	s	z	900	814	900	gist428_2	120	Old	0	1	2			z	6	6	MF_old_120_1
P04	0 immédiat	fuit/legumes isoles34	mur	fruits/legumes	Old	meaningfull	1	r	l	r	332	571	332	gist434_2	120	Old	1	0	4	r	1			1	MF_old_120_1
P04	0 immédiat	fuit/legumes isoles43	cafe	fruits/legumes	Old	meaningfull	1	a	s	a	331	1007	331	gist443_2	120	Old	0	1	1			a	5	5	MF_old_120_1
P04	0 immédiat	fuit/legumes isoles52	datte	fruits/legumes	Old	meaningfull	1	r	s	r	467	1051	467	gist452_3	120	Old	0	1	4			r	8	8	MF_old_120_1
P04	0 immédiat	fuit/legumes isoles60	carotte	fruits/legumes	Old	meaningfull	1	r	l	r	1076	632	1076	gist462_1	120	Old	1	0	4	r	1			1	MF_old_120_1
P04	0 immédiat	animal6	grenouille	animal	Old	meaningfull	2	r	s	r	1211	784	1211	gist006_1	120	Old	0	1	4			r	8	8	MF_old_120_2
P04	0 immédiat	animal18	ours polaire	animal	Old	meaningfull	2	r	l	r	284	792	284	gist018_2	120	Old	1	0	4	r	1			1	MF_old_120_2
P04	0 immédiat	animal30	chien	animal	Old	meaningfull	2	e	s	e	212	1138	212	gist030_1	120	Old	0	1	3			e	7	7	MF_old_120_2
P04	0 immédiat	animal38	zebre	animal	Old	meaningfull	2	z	s	z	780	2428	780	gist038_1	120	Old	0	1	2			z	6	6	MF_old_120_2
P04	0 immédiat	animal44	vache	animal	Old	meaningfull	2	e	s	e	2659	2086	2659	gist044_2	120	Old	0	1	3			e	7	7	MF_old_120_2
P04	0 immédiat	animal53	bison	animal	Old	meaningfull	2	r	l	r	1172	342	1172	gist053_1	120	Old	1	0	4	r	1			1	MF_old_120_2
P04	0 immédiat	animal62	ane	animal	Old	meaningfull	2	z	l	z	492	636	492	gist062_1	120	Old	1	0	2	z	3			3	MF_old_120_2
P04	0 immédiat	animal80	coq	animal	Old	meaningfull	2	e	l	e	1276	515	1276	gist080_1	120	Old	1	0	3	e	2			2	MF_old_120_2
P04	0 immédiat	paysage11	montagne	paysage	Old	meaningfull	2	r	l	r	1972	1722	1972	gist111_1	120	Old	1	0	4	r	1			1	MF_old_120_2
P04	0 immédiat	paysage20	champ	paysage	Old	meaningfull	2	a	s	a	652	1170	652	gist120_1	120	Old	0	1	1			a	5	5	MF_old_120_2
P04	0 immédiat	paysage25	route	paysage	Old	meaningfull	2	r	l	r	316	534	316	gist125_4	120	Old	1	0	4	r	1			1	MF_old_120_2
P04	0 immédiat	objet isole5	eponde	objet isole	Old	meaningfull	2	r	l	r	332	620	332	gist155_1	120	Old	1	0	4	r	1			1	MF_old_120_2
P04	0 immédiat	objet isole14	pince Ã linge	objet isole	Old	meaningfull	2	r	l	r	412	534	412	gist163_1	120	Old	1	0	4	r	1			1	MF_old_120_2
P04	0 immédiat	objet isole24	pince	objet isole	Old	meaningfull	2	r	l	r	420	518	420	gist173_1	120	Old	1	0	4	r	1			1	MF_old_120_2
P04	0 immédiat	fuit/legumes isoles1	pomme	fruits/legumes	Old	meaningfull	2	e	l	e	852	2759	852	gist401_1	120	Old	1	0	3	e	2			2	MF_old_120_2
P04	0 immédiat	fuit/legumes isoles18	champignion	fruits/legumes	Old	meaningfull	2	r	l	r	213	393	213	gist418_2	120	Old	1	0	4	r	1			1	MF_old_120_2
P04	0 immédiat	fuit/legumes isoles32	cacahouette	fruits/legumes	Old	meaningfull	2	r	l	r	804	1056	804	gist432_2	120	Old	1	0	4	r	1			1	MF_old_120_2
P04	0 immédiat	fuit/legumes isoles39	poulet	fruits/legumes	Old	meaningfull	2	r	l	r	564	675	564	gist439_2	120	Old	1	0	4	r	1			1	MF_old_120_2
P04	0 immédiat	fuit/legumes isoles47	avocat	fruits/legumes	Old	meaningfull	2	r	s	r	412	572	412	gist448_1	120	Old	0	1	4			r	8	8	MF_old_120_2
P04	0 immédiat	fuit/legumes isoles58	croissant	fruits/legumes	Old	meaningfull	2	r	l	r	172	1641	172	gist460_1	120	Old	1	0	4	r	1			1	MF_old_120_2
P04	0 immédiat	animal8	tortue	animal	Old	meaningfull	1	z	l	z	1292	7185	1292	gist008_1	1920	Old	1	0	2	z	3			3	MF_old_1920_1
P04	0 immédiat	animal21	rinoceroce	animal	Old	meaningfull	1	r	l	r	932	1115	932	gist021_1	1920	Old	1	0	4	r	1			1	MF_old_1920_1
P04	0 immédiat	animal31	loup	animal	Old	meaningfull	1	r	l	r	316	555	316	gist031_1	1920	Old	1	0	4	r	1			1	MF_old_1920_1
P04	0 immédiat	animal40	cerf	animal	Old	meaningfull	1	a	s	a	340	2365	340	gist040_2	1920	Old	0	1	1			a	5	5	MF_old_1920_1
P04	0 immédiat	animal45	kangourou	animal	Old	meaningfull	1	r	l	r	1420	855	1420	gist045_1	1920	Old	1	0	4	r	1			1	MF_old_1920_1
P04	0 immédiat	animal54	mouton	animal	Old	meaningfull	1	e	s	e	636	2397	636	gist054_1	1920	Old	0	1	3			e	7	7	MF_old_1920_1
P04	0 immédiat	animal67	pinguin	animal	Old	meaningfull	1	r	l	r	372	641	372	gist067_1	1920	Old	1	0	4	r	1			1	MF_old_1920_1
P04	0 immédiat	paysage2	plage	paysage	Old	meaningfull	1	r	l	r	820	897	820	gist102_1	1920	Old	1	0	4	r	1			1	MF_old_1920_1
P04	0 immédiat	paysage13	desert:steppe	paysage	Old	meaningfull	1	r	l	r	716	1391	716	gist113_2	1920	Old	1	0	4	r	1			1	MF_old_1920_1
P04	0 immédiat	paysage25	route	paysage	Old	meaningfull	1	r	l	r	308	779	308	gist125_1	1920	Old	1	0	4	r	1			1	MF_old_1920_1
P04	0 immédiat	paysage25	route	paysage	Old	meaningfull	1	r	l	r	172	425	172	gist125_8	1920	Old	1	0	4	r	1			1	MF_old_1920_1
P04	0 immédiat	objet isole8	epingles nourisse	objet isole	Old	meaningfull	1	r	l	r	204	617	204	gist157_2	1920	Old	1	0	4	r	1			1	MF_old_1920_1
P04	0 immédiat	objet isole16	couverts	objet isole	Old	meaningfull	1	r	l	r	365	628	365	gist165_1	1920	Old	1	0	4	r	1			1	MF_old_1920_1
P04	0 immédiat	objet isole26	scie	objet isole	Old	meaningfull	1	r	s	r	436	1161	436	gist175_1	1920	Old	0	1	4			r	8	8	MF_old_1920_1
P04	0 immédiat	fuit/legumes isoles3	orange	fruits/legumes	Old	meaningfull	1	r	l	r	1268	1361	1268	gist403_2	1920	Old	1	0	4	r	1			1	MF_old_1920_1
P04	0 immédiat	fuit/legumes isoles19	tomate	fruits/legumes	Old	meaningfull	1	r	s	r	92	695	92	gist419_1	1920	Old	0	1	4			r	8	8	MF_old_1920_1
P04	0 immédiat	fuit/legumes isoles33	myrtille	fruits/legumes	Old	meaningfull	1	r	l	r	245	405	245	gist433_2	1920	Old	1	0	4	r	1			1	MF_old_1920_1
P04	0 immédiat	fuit/legumes isoles40	jambon	fruits/legumes	Old	meaningfull	1	r	l	r	228	1701	228	gist440_2	1920	Old	1	0	4	r	1			1	MF_old_1920_1
P04	0 immédiat	fuit/legumes isoles51	blette	fruits/legumes	Old	meaningfull	1	r	l	r	923	1164	923	gist451_2	1920	Old	1	0	4	r	1			1	MF_old_1920_1
P04	0 immédiat	fuit/legumes isoles59	radis	fruits/legumes	Old	meaningfull	1	e	l	e	748	2578	748	gist461_1	1920	Old	1	0	3	e	2			2	MF_old_1920_1
P04	0 immédiat	animal5	papillon	animal	Old	meaningfull	2	a	s	a	1532	1658	1532	gist005_1	1920	Old	0	1	1			a	5	5	MF_old_1920_2
P04	0 immédiat	animal17	dauphin	animal	Old	meaningfull	2	r	l	r	684	1202	684	gist017_2	1920	Old	1	0	4	r	1			1	MF_old_1920_2
P04	0 immédiat	animal26	ours	animal	Old	meaningfull	2	z	l	z	484	2057	484	gist026_2	1920	Old	1	0	2	z	3			3	MF_old_1920_2
P04	0 immédiat	animal35	tigre	animal	Old	meaningfull	2	r	l	r	436	570	436	gist035_2	1920	Old	1	0	4	r	1			1	MF_old_1920_2
P04	0 immédiat	animal42	giraffe	animal	Old	meaningfull	2	e	s	e	228	537	228	gist042_3	1920	Old	0	1	3			e	7	7	MF_old_1920_2
P04	0 immédiat	animal52	bouc	animal	Old	meaningfull	2	r	l	r	228	458	228	gist052_2	1920	Old	1	0	4	r	1			1	MF_old_1920_2
P04	0 immédiat	animal60	panthÃ¨re noire	animal	Old	meaningfull	2	r	l	r	356	615	356	gist060_2	1920	Old	1	0	4	r	1			1	MF_old_1920_2
P04	0 immédiat	animal79	cigogne	animal	Old	meaningfull	2	z	s	z	252	1786	252	gist079_1	1920	Old	0	1	2			z	6	6	MF_old_1920_2
P04	0 immédiat	paysage7	foret	paysage	Old	meaningfull	2	r	l	r	316	609	316	gist107_1	1920	Old	1	0	4	r	1			1	MF_old_1920_2
P04	0 immédiat	paysage19	champ	paysage	Old	meaningfull	2	e	s	e	516	1319	516	gist119_1	1920	Old	0	1	3			e	7	7	MF_old_1920_2
P04	0 immédiat	paysage25	route	paysage	Old	meaningfull	2	r	l	r	155	889	155	gist125_2	1920	Old	1	0	4	r	1			1	MF_old_1920_2
P04	0 immédiat	objet isole4	peigne	objet isole	Old	meaningfull	2	r	l	r	212	431	212	gist154_1	1920	Old	1	0	4	r	1			1	MF_old_1920_2
P04	0 immédiat	objet isole13	ciseau	objet isole	Old	meaningfull	2	r	l	r	507	756	507	gist162_1	1920	Old	1	0	4	r	1			1	MF_old_1920_2
P04	0 immédiat	objet isole23	des	objet isole	Old	meaningfull	2	r	l	r	1188	607	1188	gist172_1	1920	Old	1	0	4	r	1			1	MF_old_1920_2
P04	0 immédiat	objet isole31	spatule	objet isole	Old	meaningfull	2	r	l	r	388	3689	388	gist180_1	1920	Old	1	0	4	r	1			1	MF_old_1920_2
P04	0 immédiat	fuit/legumes isoles9	pasteque	fruits/legumes	Old	meaningfull	2	z	s	z	148	988	148	gist409_1	1920	Old	0	1	2			z	6	6	MF_old_1920_2
P04	0 immédiat	fuit/legumes isoles30	choux	fruits/legumes	Old	meaningfull	2	r	l	r	444	640	444	gist430_2	1920	Old	1	0	4	r	1			1	MF_old_1920_2
P04	0 immédiat	fuit/legumes isoles36	paplemousse	fruits/legumes	Old	meaningfull	2	r	l	r	324	693	324	gist436_2	1920	Old	1	0	4	r	1			1	MF_old_1920_2
P04	0 immédiat	fuit/legumes isoles45	haricot	fruits/legumes	Old	meaningfull	2	r	l	r	228	315	228	gist446_2	1920	Old	1	0	4	r	1			1	MF_old_1920_2
P04	0 immédiat	fuit/legumes isoles56	poivron	fruits/legumes	Old	meaningfull	2	z	s	z	2460	608	2460	gist457_1	1920	Old	0	1	2			z	6	6	MF_old_1920_2
P04	0 immédiat	animal15	poisson	animal	New-oldGist	meaningfull	1	e	s	e	572	3901	572	gist015_1	120	R-gist	0	1	3			e	7	7	MF_N_oldGist_120_1
P04	0 immédiat	animal47	chevre	animal	New-oldGist	meaningfull	1	a	s	a	180	3847	180	gist047_1	120	R-gist	0	1	1			a	5	5	MF_N_oldGist_120_1
P04	0 immédiat	animal78	casoar	animal	New-oldGist	meaningfull	1	a	l	a	1012	212	1012	gist078_1	120	R-gist	1	0	1	a	4			4	MF_N_oldGist_120_1
P04	0 immédiat	paysage15	fond marin	paysage	New-oldGist	meaningfull	1	e	s	e	444	682	444	gist115_1	120	R-gist	0	1	3			e	7	7	MF_N_oldGist_120_1
P04	0 immédiat	paysage25	route	paysage	New-oldGist	meaningfull	1	r	s	r	300	1382	300	gist125_5	120	R-gist	0	1	4			r	8	8	MF_N_oldGist_120_1
P04	0 immédiat	objet isole1	balle	objet isole	New-oldGist	meaningfull	1	r	s	r	412	499	412	gist151_1	120	R-gist	0	1	4			r	8	8	MF_N_oldGist_120_1
P04	0 immédiat	objet isole17	compa	objet isole	New-oldGist	meaningfull	1	e	s	e	412	1317	412	gist166_1	120	R-gist	0	1	3			e	7	7	MF_N_oldGist_120_1
P04	0 immédiat	fuit/legumes isoles22	mais	fruits/legumes	New-oldGist	meaningfull	1	a	l	a	420	4287	420	gist422_2	120	R-gist	1	0	1	a	4			4	MF_N_oldGist_120_1
P04	0 immédiat	fuit/legumes isoles38	brocoli	fruits/legumes	New-oldGist	meaningfull	1	r	l	r	268	507	268	gist438_2	120	R-gist	1	0	4	r	1			1	MF_N_oldGist_120_1
P04	0 immédiat	fuit/legumes isoles57	pizza	fruits/legumes	New-oldGist	meaningfull	1	e	s	e	162	467	162	gist459_1	120	R-gist	0	1	3			e	7	7	MF_N_oldGist_120_1
P04	0 immédiat	animal3	sauterelle	animal	New-oldGist	meaningfull	2	z	s	z	115	700	115	gist003_2	120	R-gist	0	1	2			z	6	6	MF_N_oldGist_120_2
P04	0 immédiat	animal39	cheval	animal	New-oldGist	meaningfull	2	r	s	r	132	458	132	gist039_3	120	R-gist	0	1	4			r	8	8	MF_N_oldGist_120_2
P04	0 immédiat	animal75	perroquet	animal	New-oldGist	meaningfull	2	r	s	r	148	1070	148	gist075_1	120	R-gist	0	1	4			r	8	8	MF_N_oldGist_120_2
P04	0 immédiat	paysage8	grand canyon	paysage	New-oldGist	meaningfull	2	r	s	r	700	1076	700	gist108_3	120	R-gist	0	1	4			r	8	8	MF_N_oldGist_120_2
P04	0 immédiat	paysage23	cascade	paysage	New-oldGist	meaningfull	2	r	s	r	92	1423	92	gist123_1	120	R-gist	0	1	4			r	8	8	MF_N_oldGist_120_2
P04	0 immédiat	paysage28	farwest	paysage	New-oldGist	meaningfull	2	r	s	r	916	1920	916	gist128_1	120	R-gist	0	1	4			r	8	8	MF_N_oldGist_120_2
P04	0 immédiat	objet isole10	marteau	objet isole	New-oldGist	meaningfull	2	e	s	e	396	3015	396	gist159_1	120	R-gist	0	1	3			e	7	7	MF_N_oldGist_120_2
P04	0 immédiat	fuit/legumes isoles4	banane	fruits/legumes	New-oldGist	meaningfull	2	z	s	z	228	2128	228	gist404_1	120	R-gist	0	1	2			z	6	6	MF_N_oldGist_120_2
P04	0 immédiat	fuit/legumes isoles27	pain	fruits/legumes	New-oldGist	meaningfull	2	e	l	e	1876	572	1876	gist427_1	120	R-gist	1	0	3	e	2			2	MF_N_oldGist_120_2
P04	0 immédiat	fuit/legumes isoles46	Å“uf	fruits/legumes	New-oldGist	meaningfull	2	r	s	r	1188	606	1188	gist447_3	120	R-gist	0	1	4			r	8	8	MF_N_oldGist_120_2
P04	0 immédiat	animal4	champigon	animal	New-oldGist	meaningfull	1	r	s	r	204	637	204	gist004_2	1920	R-gist	0	1	4			r	8	8	MF_N_oldGist_1920_1
P04	0 immédiat	animal43	chameau	animal	New-oldGist	meaningfull	1	e	s	e	748	5265	748	gist043_1	1920	R-gist	0	1	3			e	7	7	MF_N_oldGist_1920_1
P04	0 immédiat	animal76	paon	animal	New-oldGist	meaningfull	1	r	s	r	308	2318	308	gist076_1	1920	R-gist	0	1	4			r	8	8	MF_N_oldGist_1920_1
P04	0 immédiat	paysage9	montagne eneige	paysage	New-oldGist	meaningfull	1	e	s	e	548	952	548	gist109_1	1920	R-gist	0	1	3			e	7	7	MF_N_oldGist_1920_1
P04	0 immédiat	paysage25	route	paysage	New-oldGist	meaningfull	1	r	s	r	1508	620	1508	gist125_3	1920	R-gist	0	1	4			r	8	8	MF_N_oldGist_1920_1
P04	0 immédiat	paysage30	grotte	paysage	New-oldGist	meaningfull	1	r	s	r	292	529	292	gist130_1	1920	R-gist	0	1	4			r	8	8	MF_N_oldGist_1920_1
P04	0 immédiat	objet isole12	pinceau	objet isole	New-oldGist	meaningfull	1	r	s	r	132	736	132	gist161_1	1920	R-gist	0	1	4			r	8	8	MF_N_oldGist_1920_1
P04	0 immédiat	fuit/legumes isoles6	noix de coco	fruits/legumes	New-oldGist	meaningfull	1	r	l	r	660	796	660	gist406_2	1920	R-gist	1	0	4	r	1			1	MF_N_oldGist_1920_1
P04	0 immédiat	fuit/legumes isoles37	pÃªche	fruits/legumes	New-oldGist	meaningfull	1	r	s	r	2667	500	2667	gist437_1	1920	R-gist	0	1	4			r	8	8	MF_N_oldGist_1920_1
P04	0 immédiat	fuit/legumes isoles49	kaki	fruits/legumes	New-oldGist	meaningfull	1	r	s	r	180	405	180	gist449_1	1920	R-gist	0	1	4			r	8	8	MF_N_oldGist_1920_1
P04	0 immédiat	animal1	escargot	animal	New-oldGist	meaningfull	2	r	s	r	324	1593	324	gist001_1	1920	R-gist	0	1	4			r	8	8	MF_N_oldGist_1920_2
P04	0 immédiat	animal16	phoque	animal	New-oldGist	meaningfull	2	r	s	r	196	531	196	gist016_1	1920	R-gist	0	1	4			r	8	8	MF_N_oldGist_1920_2
P04	0 immédiat	animal68	cygne	animal	New-oldGist	meaningfull	2	e	s	e	380	997	380	gist068_1	1920	R-gist	0	1	3			e	7	7	MF_N_oldGist_1920_2
P04	0 immédiat	paysage1	ciel	paysage	New-oldGist	meaningfull	2	z	s	z	741	722	741	gist101_1	1920	R-gist	0	1	2			z	6	6	MF_N_oldGist_1920_2
P04	0 immédiat	paysage17	banquise	paysage	New-oldGist	meaningfull	2	e	s	e	188	562	188	gist117_2	1920	R-gist	0	1	3			e	7	7	MF_N_oldGist_1920_2
P04	0 immédiat	paysage27	fougÃ¨re	paysage	New-oldGist	meaningfull	2	z	s	z	532	1123	532	gist127_1	1920	R-gist	0	1	2			z	6	6	MF_N_oldGist_1920_2
P04	0 immédiat	objet isole2	brosse	objet isole	New-oldGist	meaningfull	2	z	l	z	636	1621	636	gist152_1	1920	R-gist	1	0	2	z	3			3	MF_N_oldGist_1920_2
P04	0 immédiat	fuit/legumes isoles2	poire	fruits/legumes	New-oldGist	meaningfull	2	r	s	r	139	450	139	gist402_2	1920	R-gist	0	1	4			r	8	8	MF_N_oldGist_1920_2
P04	0 immédiat	fuit/legumes isoles26	fromage	fruits/legumes	New-oldGist	meaningfull	2	r	s	r	188	1110	188	gist426_1	1920	R-gist	0	1	4			r	8	8	MF_N_oldGist_1920_2
P04	0 immédiat	fuit/legumes isoles42	steak	fruits/legumes	New-oldGist	meaningfull	2	a	l	a	2004	9722	2004	gist442_3	1920	R-gist	1	0	1	a	4			4	MF_N_oldGist_1920_2
P04	0 immédiat	animal11	varan	animal	New	meaningfull	0	r	s	r	676	1645	676	gist011_1		R-newgist	0	1	4			r	8	8	MF_new
P04	0 immédiat	animal12	punaise	animal	New	meaningfull	0	r	s	r	308	584	308	gist012_1		R-newgist	0	1	4			r	8	8	MF_new
P04	0 immédiat	animal14	libellule	animal	New	meaningfull	0	e	s	e	844	1912	844	gist014_1		R-newgist	0	1	3			e	7	7	MF_new
P04	0 immédiat	animal19	orque	animal	New	meaningfull	0	z	s	z	308	1441	308	gist019_1		R-newgist	0	1	2			z	6	6	MF_new
P04	0 immédiat	animal23	buffle	animal	New	meaningfull	0	z	s	z	468	5247	468	gist023_1		R-newgist	0	1	2			z	6	6	MF_new
P04	0 immédiat	animal24	hippopotame	animal	New	meaningfull	0	r	s	r	204	441	204	gist024_1		R-newgist	0	1	4			r	8	8	MF_new
P04	0 immédiat	animal32	renard	animal	New	meaningfull	0	e	s	e	540	2461	540	gist032_1		R-newgist	0	1	3			e	7	7	MF_new
P04	0 immédiat	animal34	lion	animal	New	meaningfull	0	r	s	r	348	851	348	gist034_4		R-newgist	0	1	4			r	8	8	MF_new
P04	0 immédiat	animal36	chat	animal	New	meaningfull	0	a	s	a	756	4943	756	gist036_2		R-newgist	0	1	1			a	5	5	MF_new
P04	0 immédiat	animal46	leopard	animal	New	meaningfull	0	e	s	e	1012	618	1012	gist046_2		R-newgist	0	1	3			e	7	7	MF_new
P04	0 immédiat	animal120	blereau	animal	New	meaningfull	0	r	s	r	284	578	284	gist050_2		R-newgist	0	1	4			r	8	8	MF_new
P04	0 immédiat	animal55	singe	animal	New	meaningfull	0	r	s	r	252	594	252	gist055_1		R-newgist	0	1	4			r	8	8	MF_new
P04	0 immédiat	animal66	autruche	animal	New	meaningfull	0	e	s	e	388	533	388	gist066_1		R-newgist	0	1	3			e	7	7	MF_new
P04	0 immédiat	animal69	oiseau	animal	New	meaningfull	0	r	s	r	180	1327	180	gist069_1		R-newgist	0	1	4			r	8	8	MF_new
P04	0 immédiat	animal71	oie	animal	New	meaningfull	0	r	s	r	996	490	996	gist071_1		R-newgist	0	1	4			r	8	8	MF_new
P04	0 immédiat	animal72	oiseau2	animal	New	meaningfull	0	r	s	r	180	335	180	gist072_1		R-newgist	0	1	4			r	8	8	MF_new
P04	0 immédiat	paysage5	coucher de soleil	paysage	New	meaningfull	0	e	s	e	1509	1743	1509	gist105_1		R-newgist	0	1	3			e	7	7	MF_new
P04	0 immédiat	paysage7	foret	paysage	New	meaningfull	0	e	l	e	436	953	436	gist107_2		R-newgist	1	0	3	e	2			2	MF_new
P04	0 immédiat	paysage10	montagne	paysage	New	meaningfull	0	z	s	z	228	2025	228	gist110_1		R-newgist	0	1	2			z	6	6	MF_new
P04	0 immédiat	paysage18	neige	paysage	New	meaningfull	0	a	l	a	1283	5001	1283	gist118_1		R-newgist	1	0	1	a	4			4	MF_new
P04	0 immédiat	paysage22	mer/montagne	paysage	New	meaningfull	0	e	s	e	2380	1724	2380	gist122_1		R-newgist	0	1	3			e	7	7	MF_new
P04	0 immédiat	paysage26	desert	paysage	New	meaningfull	0	r	s	r	844	769	844	gist126_1		R-newgist	0	1	4			r	8	8	MF_new
P04	0 immédiat	objet isole7	trombone	objet isole	New	meaningfull	0	a	l	a	1796	7762	1796	gist157_1		R-newgist	1	0	1	a	4			4	MF_new
P04	0 immédiat	objet isole9	fil	objet isole	New	meaningfull	0	r	s	r	140	489	140	gist158_1		R-newgist	0	1	4			r	8	8	MF_new
P04	0 immédiat	objet isole15	crayon	objet isole	New	meaningfull	0	z	s	z	1332	2336	1332	gist164_1		R-newgist	0	1	2			z	6	6	MF_new
P04	0 immédiat	objet isole27	pioche	objet isole	New	meaningfull	0	r	s	r	251	868	251	gist176_1		R-newgist	0	1	4			r	8	8	MF_new
P04	0 immédiat	objet isole29	mÃ¨che	objet isole	New	meaningfull	0	r	s	r	292	494	292	gist178_1		R-newgist	0	1	4			r	8	8	MF_new
P04	0 immédiat	objet isole30	niveau	objet isole	New	meaningfull	0	r	s	r	188	379	188	gist179_1		R-newgist	0	1	4			r	8	8	MF_new
P04	0 immédiat	fuit/legumes isoles11	kiwi	fruits/legumes	New	meaningfull	0	z	s	z	1036	1624	1036	gist411_1		R-newgist	0	1	2			z	6	6	MF_new
P04	0 immédiat	fuit/legumes isoles13	citron vert	fruits/legumes	New	meaningfull	0	e	None	e	964	10000	964	gist413_1		R-newgist	None	0	3						MF_new
P04	0 immédiat	fuit/legumes isoles15	amande	fruits/legumes	New	meaningfull	0	z	l	z	5300	869	5300	gist415_2		R-newgist	1	0	2	z	3			3	MF_new
P04	0 immédiat	fuit/legumes isoles16	litchi	fruits/legumes	New	meaningfull	0	z	s	z	341	1218	341	gist416_1		R-newgist	0	1	2			z	6	6	MF_new
P04	0 immédiat	fuit/legumes isoles17	melon	fruits/legumes	New	meaningfull	0	r	s	r	180	343	180	gist417_1		R-newgist	0	1	4			r	8	8	MF_new
P04	0 immédiat	fuit/legumes isoles20	courgette	fruits/legumes	New	meaningfull	0	r	l	r	300	821	300	gist420_1		R-newgist	1	0	4	r	1			1	MF_new
P04	0 immédiat	fuit/legumes isoles21	framboise	fruits/legumes	New	meaningfull	0	e	s	e	204	417	204	gist421_1		R-newgist	0	1	3			e	7	7	MF_new
P04	0 immédiat	fuit/legumes isoles23	gateau	fruits/legumes	New	meaningfull	0	r	s	r	220	682	220	gist423_2		R-newgist	0	1	4			r	8	8	MF_new
P04	0 immédiat	fuit/legumes isoles24	hotdog	fruits/legumes	New	meaningfull	0	e	s	e	244	1067	244	gist424_2		R-newgist	0	1	3			e	7	7	MF_new
P04	0 immédiat	fuit/legumes isoles35	patate	fruits/legumes	New	meaningfull	0	None	l	None	10000	4673	10000	gist435_2		R-newgist	1	0	Non3	None	Non2			Non2	MF_new
P04	0 immédiat	fuit/legumes isoles44	noisette	fruits/legumes	New	meaningfull	0	a	s	a	972	3974	972	gist444_2		R-newgist	0	1	1			a	5	5	MF_new
P04	0 immédiat	fuit/legumes isoles48	figue	fruits/legumes	New	meaningfull	0	r	s	r	5381	1686	5381	gist448_3		R-newgist	0	1	4			r	8	8	MF_new
P04	0 immédiat	meaningless091	meanigless	meanigless	New	meaningless	0	e	s	e	764	832	764	Image0007		New	0	1	3			e	7	7	ML_new
P04	0 immédiat	meaningless109	meanigless	meanigless	New	meaningless	0	z	s	z	1003	957	1003	Image0008		New	0	1	2			z	6	6	ML_new
P04	0 immédiat	meaningless127	meanigless	meanigless	New	meaningless	0	e	l	e	684	1111	684	Image0011		New	1	0	3	e	2			2	ML_new
P04	0 immédiat	meaningless159	meanigless	meanigless	New	meaningless	0	e	s	e	731	1368	731	Image0016		New	0	1	3			e	7	7	ML_new
P04	0 immédiat	meaningless145	meanigless	meanigless	New	meaningless	0	e	s	e	780	823	780	Image0069		New	0	1	3			e	7	7	ML_new
P04	0 immédiat	meaningless092	meanigless	meanigless	New	meaningless	0	e	s	e	404	1585	404	Image0084		New	0	1	3			e	7	7	ML_new
P04	0 immédiat	meaningless110	meanigless	meanigless	New	meaningless	0	r	s	r	308	1062	308	Image0085		New	0	1	4			r	8	8	ML_new
P04	0 immédiat	meaningless141	meanigless	meanigless	New	meaningless	0	z	s	z	116	808	116	Image0086		New	0	1	2			z	6	6	ML_new
P04	0 immédiat	meaningless160	meanigless	meanigless	New	meaningless	0	z	s	z	396	1647	396	Image0089		New	0	1	2			z	6	6	ML_new
P04	0 immédiat	meaningless146	meanigless	meanigless	New	meaningless	0	z	s	z	324	4227	324	Image0103		New	0	1	2			z	6	6	ML_new
P04	0 immédiat	meaningless093	meanigless	meanigless	New	meaningless	0	z	s	z	244	1033	244	Image0119		New	0	1	2			z	6	6	ML_new
P04	0 immédiat	meaningless111	meanigless	meanigless	New	meaningless	0	e	s	e	772	628	772	Image0122		New	0	1	3			e	7	7	ML_new
P04	0 immédiat	meaningless128	meanigless	meanigless	New	meaningless	0	r	s	r	355	593	355	Image0123		New	0	1	4			r	8	8	ML_new
P04	0 immédiat	meaningless147	meanigless	meanigless	New	meaningless	0	r	s	r	868	523	868	Image0155		New	0	1	4			r	8	8	ML_new
P04	0 immédiat	meaningless094	meanigless	meanigless	New	meaningless	0	a	s	a	220	2893	220	Image0171		New	0	1	1			a	5	5	ML_new
P04	0 immédiat	meaningless112	meanigless	meanigless	New	meaningless	0	e	s	e	628	1379	628	Image0172		New	0	1	3			e	7	7	ML_new
P04	0 immédiat	meaningless129	meanigless	meanigless	New	meaningless	0	r	s	r	380	551	380	Image0174		New	0	1	4			r	8	8	ML_new
P04	0 immédiat	meaningless105	meanigless	meanigless	New	meaningless	0	r	s	r	1228	1188	1228	Image0201		New	0	1	4			r	8	8	ML_new
P04	0 immédiat	meaningless123	meanigless	meanigless	New	meaningless	0	r	s	r	276	474	276	Image0202		New	0	1	4			r	8	8	ML_new
P04	0 immédiat	meaningless148	meanigless	meanigless	New	meaningless	0	r	s	r	813	1243	813	Image0214		New	0	1	4			r	8	8	ML_new
P04	0 immédiat	meaningless095	meanigless	meanigless	New	meaningless	0	z	l	z	652	2445	652	Image0235		New	1	0	2	z	3			3	ML_new
P04	0 immédiat	meaningless124	meanigless	meanigless	New	meaningless	0	z	s	z	1628	1134	1628	Image0239		New	0	1	2			z	6	6	ML_new
P04	0 immédiat	meaningless130	meanigless	meanigless	New	meaningless	0	z	s	z	364	1344	364	Image0240		New	0	1	2			z	6	6	ML_new
P04	0 immédiat	meaningless149	meanigless	meanigless	New	meaningless	0	e	s	e	796	1111	796	Image0340		New	0	1	3			e	7	7	ML_new
P04	0 immédiat	meaningless087	meanigless	meanigless	New	meaningless	0	e	s	e	196	1751	196	Image0381		New	0	1	3			e	7	7	ML_new
P04	0 immédiat	meaningless096	meanigless	meanigless	New	meaningless	0	r	s	r	148	468	148	Image0386		New	0	1	4			r	8	8	ML_new
P04	0 immédiat	meaningless113	meanigless	meanigless	New	meaningless	0	a	s	a	388	1548	388	Image0402		New	0	1	1			a	5	5	ML_new
P04	0 immédiat	meaningless131	meanigless	meanigless	New	meaningless	0	a	s	a	4020	1494	4020	Image0403		New	0	1	1			a	5	5	ML_new
P04	0 immédiat	meaningless097	meanigless	meanigless	New	meaningless	0	a	l	a	620	2665	620	Image0456		New	1	0	1	a	4			4	ML_new
P04	0 immédiat	meaningless114	meanigless	meanigless	New	meaningless	0	a	s	a	204	572	204	Image0457		New	0	1	1			a	5	5	ML_new
P04	0 immédiat	meaningless132	meanigless	meanigless	New	meaningless	0	z	l	z	604	745	604	Image0458		New	1	0	2	z	3			3	ML_new
P04	0 immédiat	meaningless150	meanigless	meanigless	New	meaningless	0	e	s	e	251	567	251	Image0476		New	0	1	3			e	7	7	ML_new
P04	0 immédiat	meaningless098	meanigless	meanigless	New	meaningless	0	r	l	r	172	725	172	Image0486		New	1	0	4	r	1			1	ML_new
P04	0 immédiat	meaningless115	meanigless	meanigless	New	meaningless	0	e	l	e	388	1457	388	Image0487		New	1	0	3	e	2			2	ML_new
P04	0 immédiat	meaningless133	meanigless	meanigless	New	meaningless	0	a	s	a	444	2899	444	Image0488		New	0	1	1			a	5	5	ML_new
P04	0 immédiat	meaningless151	meanigless	meanigless	New	meaningless	0	z	s	z	252	1816	252	Image0609		New	0	1	2			z	6	6	ML_new
P04	0 immédiat	meaningless099	meanigless	meanigless	New	meaningless	0	e	s	e	556	628	556	Image0617		New	0	1	3			e	7	7	ML_new
P04	0 immédiat	meaningless116	meanigless	meanigless	New	meaningless	0	z	s	z	1908	671	1908	Image0618		New	0	1	2			z	6	6	ML_new
P04	0 immédiat	meaningless134	meanigless	meanigless	New	meaningless	0	z	s	z	932	3304	932	Image0619		New	0	1	2			z	6	6	ML_new
P04	0 immédiat	meaningless088	meanigless	meanigless	New	meaningless	0	r	s	r	420	1428	420	Image0630		New	0	1	4			r	8	8	ML_new
P04	0 immédiat	meaningless152	meanigless	meanigless	New	meaningless	0	e	s	e	148	1822	148	Image0635		New	0	1	3			e	7	7	ML_new
P04	0 immédiat	meaningless081	meanigless	meanigless	New	meaningless	0	e	l	e	204	551	204	Image0643		New	1	0	3	e	2			2	ML_new
P04	0 immédiat	meaningless100	meanigless	meanigless	New	meaningless	0	r	s	r	316	658	316	Image0644		New	0	1	4			r	8	8	ML_new
P04	0 immédiat	meaningless117	meanigless	meanigless	New	meaningless	0	z	s	z	316	2439	316	Image0645		New	0	1	2			z	6	6	ML_new
P04	0 immédiat	meaningless135	meanigless	meanigless	New	meaningless	0	e	s	e	1852	868	1852	Image0646		New	0	1	3			e	7	7	ML_new
P04	0 immédiat	meaningless153	meanigless	meanigless	New	meaningless	0	r	s	r	267	1456	267	Image0664		New	0	1	4			r	8	8	ML_new
P04	0 immédiat	meaningless082	meanigless	meanigless	New	meaningless	0	a	l	a	2964	4091	2964	Image0671		New	1	0	1	a	4			4	ML_new
P04	0 immédiat	meaningless101	meanigless	meanigless	New	meaningless	0	r	s	r	564	1322	564	Image0672		New	0	1	4			r	8	8	ML_new
P04	0 immédiat	meaningless118	meanigless	meanigless	New	meaningless	0	z	s	z	228	1505	228	Image0673		New	0	1	2			z	6	6	ML_new
P04	0 immédiat	meaningless136	meanigless	meanigless	New	meaningless	0	r	s	r	380	4638	380	Image0674		New	0	1	4			r	8	8	ML_new
P04	0 immédiat	meaningless154	meanigless	meanigless	New	meaningless	0	z	s	z	1452	2184	1452	Image0691		New	0	1	2			z	6	6	ML_new
P04	0 immédiat	meaningless083	meanigless	meanigless	New	meaningless	0	e	s	e	460	1234	460	Image0698		New	0	1	3			e	7	7	ML_new
P04	0 immédiat	meaningless102	meanigless	meanigless	New	meaningless	0	r	s	r	212	445	212	Image0701		New	0	1	4			r	8	8	ML_new
P04	0 immédiat	meaningless119	meanigless	meanigless	New	meaningless	0	z	l	z	1292	2899	1292	Image0702		New	1	0	2	z	3			3	ML_new
P04	0 immédiat	meaningless137	meanigless	meanigless	New	meaningless	0	a	s	a	332	1229	332	Image0704		New	0	1	1			a	5	5	ML_new
P04	0 immédiat	meaningless155	meanigless	meanigless	New	meaningless	0	e	s	e	676	900	676	Image0896		New	0	1	3			e	7	7	ML_new
P04	0 immédiat	meaningless084	meanigless	meanigless	New	meaningless	0	r	l	r	372	1924	372	Image0932		New	1	0	4	r	1			1	ML_new
P04	0 immédiat	meaningless103	meanigless	meanigless	New	meaningless	0	a	l	a	3052	410	3052	Image0933		New	1	0	1	a	4			4	ML_new
P04	0 immédiat	meaningless120	meanigless	meanigless	New	meaningless	0	z	s	z	756	678	756	Image1001		New	0	1	2			z	6	6	ML_new
P04	0 immédiat	meaningless138	meanigless	meanigless	New	meaningless	0	z	s	z	387	2649	387	Image1101		New	0	1	2			z	6	6	ML_new
P04	0 immédiat	meaningless156	meanigless	meanigless	New	meaningless	0	r	s	r	516	1099	516	Image1207		New	0	1	4			r	8	8	ML_new
P04	0 immédiat	meaningless085	meanigless	meanigless	New	meaningless	0	e	s	e	300	1111	300	Image1215		New	0	1	3			e	7	7	ML_new
P04	0 immédiat	meaningless106	meanigless	meanigless	New	meaningless	0	a	s	a	660	2778	660	Image1216		New	0	1	1			a	5	5	ML_new
P04	0 immédiat	meaningless121	meanigless	meanigless	New	meaningless	0	r	l	r	148	2075	148	Image1217		New	1	0	4	r	1			1	ML_new
P04	0 immédiat	meaningless139	meanigless	meanigless	New	meaningless	0	r	s	r	164	808	164	Image1218		New	0	1	4			r	8	8	ML_new
P04	0 immédiat	meaningless142	meanigless	meanigless	New	meaningless	0	r	s	r	428	1300	428	Image1232		New	0	1	4			r	8	8	ML_new
P04	0 immédiat	meaningless157	meanigless	meanigless	New	meaningless	0	z	l	z	860	1164	860	Image1234		New	1	0	2	z	3			3	ML_new
P04	0 immédiat	meaningless086	meanigless	meanigless	New	meaningless	0	z	s	z	852	757	852	Image1245		New	0	1	2			z	6	6	ML_new
P04	0 immédiat	meaningless104	meanigless	meanigless	New	meaningless	0	e	s	e	220	1430	220	Image1246		New	0	1	3			e	7	7	ML_new
P04	0 immédiat	meaningless122	meanigless	meanigless	New	meaningless	0	e	s	e	684	1680	684	Image1247		New	0	1	3			e	7	7	ML_new
P04	0 immédiat	meaningless140	meanigless	meanigless	New	meaningless	0	r	s	r	148	2064	148	Image1250		New	0	1	4			r	8	8	ML_new
P04	0 immédiat	meaningless158	meanigless	meanigless	New	meaningless	0	r	s	r	668	1397	668	Image1273		New	0	1	4			r	8	8	ML_new
P04	0 immédiat	meaningless089	meanigless	meanigless	New	meaningless	0	z	s	z	283	1417	283	R17		New	0	1	2			z	6	6	ML_new
P04	0 immédiat	meaningless107	meanigless	meanigless	New	meaningless	0	e	s	e	627	1116	627	R18		New	0	1	3			e	7	7	ML_new
P04	0 immédiat	meaningless125	meanigless	meanigless	New	meaningless	0	z	s	z	324	6429	324	R19		New	0	1	2			z	6	6	ML_new
P04	0 immédiat	meaningless143	meanigless	meanigless	New	meaningless	0	e	s	e	140	917	140	R20		New	0	1	3			e	7	7	ML_new
P04	0 immédiat	meaningless090	meanigless	meanigless	New	meaningless	0	r	s	r	860	2115	860	R5		New	0	1	4			r	8	8	ML_new
P04	0 immédiat	meaningless108	meanigless	meanigless	New	meaningless	0	z	s	z	404	884	404	R6		New	0	1	2			z	6	6	ML_new
P04	0 immédiat	meaningless126	meanigless	meanigless	New	meaningless	0	r	s	r	428	584	428	R7		New	0	1	4			r	8	8	ML_new
P04	0 immédiat	meaningless144	meanigless	meanigless	New	meaningless	0	e	l	e	788	1913	788	R8		New	1	0	3	e	2			2	ML_new
P04	0 immédiat	meaningless192	meanigless	meanigless	Old	meaningless	1	e	s	e	172	1988	172	Image0090	120	Old	0	1	3			e	7	7	ML_old_120_1
P04	0 immédiat	meaningless224	meanigless	meanigless	Old	meaningless	1	e	s	e	364	955	364	Image0091	120	Old	0	1	3			e	7	7	ML_old_120_1
P04	0 immédiat	meaningless180	meanigless	meanigless	Old	meaningless	1	r	s	r	148	510	148	Image0215	120	Old	0	1	4			r	8	8	ML_old_120_1
P04	0 immédiat	meaningless212	meanigless	meanigless	Old	meaningless	1	a	l	a	612	683	612	Image0220	120	Old	1	0	1	a	4			4	ML_old_120_1
P04	0 immédiat	meaningless164	meanigless	meanigless	Old	meaningless	1	r	l	r	427	798	427	Image0411	120	Old	1	0	4	r	1			1	ML_old_120_1
P04	0 immédiat	meaningless228	meanigless	meanigless	Old	meaningless	1	a	s	a	532	707	532	Image0413	120	Old	0	1	1			a	5	5	ML_old_120_1
P04	0 immédiat	meaningless196	meanigless	meanigless	Old	meaningless	1	e	s	e	1147	2718	1147	Image0462	120	Old	0	1	3			e	7	7	ML_old_120_1
P04	0 immédiat	meaningless184	meanigless	meanigless	Old	meaningless	1	z	s	z	420	616	420	Image0636	120	Old	0	1	2			z	6	6	ML_old_120_1
P04	0 immédiat	meaningless216	meanigless	meanigless	Old	meaningless	1	e	s	e	588	1428	588	Image0637	120	Old	0	1	3			e	7	7	ML_old_120_1
P04	0 immédiat	meaningless168	meanigless	meanigless	Old	meaningless	1	r	s	r	316	1718	316	Image0649	120	Old	0	1	4			r	8	8	ML_old_120_1
P04	0 immédiat	meaningless232	meanigless	meanigless	Old	meaningless	1	z	l	z	468	363	468	Image0652	120	Old	1	0	2	z	3			3	ML_old_120_1
P04	0 immédiat	meaningless200	meanigless	meanigless	Old	meaningless	1	z	l	z	436	1336	436	Image0677	120	Old	1	0	2	z	3			3	ML_old_120_1
P04	0 immédiat	meaningless188	meanigless	meanigless	Old	meaningless	1	r	l	r	1236	1447	1236	Image1208	120	Old	1	0	4	r	1			1	ML_old_120_1
P04	0 immédiat	meaningless220	meanigless	meanigless	Old	meaningless	1	r	s	r	188	2744	188	Image1209	120	Old	0	1	4			r	8	8	ML_old_120_1
P04	0 immédiat	meaningless172	meanigless	meanigless	Old	meaningless	1	e	s	e	708	839	708	Image1220	120	Old	0	1	3			e	7	7	ML_old_120_1
P04	0 immédiat	meaningless204	meanigless	meanigless	Old	meaningless	1	z	s	z	204	542	204	Image1253	120	Old	0	1	2			z	6	6	ML_old_120_1
P04	0 immédiat	meaningless236	meanigless	meanigless	Old	meaningless	1	a	l	a	1788	1989	1788	Image1254	120	Old	1	0	1	a	4			4	ML_old_120_1
P04	0 immédiat	meaningless176	meanigless	meanigless	Old	meaningless	1	r	s	r	188	526	188	R22	120	Old	0	1	4			r	8	8	ML_old_120_1
P04	0 immédiat	meaningless208	meanigless	meanigless	Old	meaningless	1	z	s	z	132	446	132	R23	120	Old	0	1	2			z	6	6	ML_old_120_1
P04	0 immédiat	meaningless240	meanigless	meanigless	Old	meaningless	1	e	s	e	308	3254	308	R24	120	Old	0	1	3			e	7	7	ML_old_120_1
P04	0 immédiat	meaningless178	meanigless	meanigless	Old	meaningless	2	e	s	e	244	2650	244	Image0107	120	Old	0	1	3			e	7	7	ML_old_120_2
P04	0 immédiat	meaningless210	meanigless	meanigless	Old	meaningless	2	r	l	r	227	2123	227	Image0108	120	Old	1	0	4	r	1			1	ML_old_120_2
P04	0 immédiat	meaningless162	meanigless	meanigless	Old	meaningless	2	r	s	r	109	396	109	Image0176	120	Old	0	1	4			r	8	8	ML_old_120_2
P04	0 immédiat	meaningless226	meanigless	meanigless	Old	meaningless	2	e	l	e	1028	2047	1028	Image0179	120	Old	1	0	3	e	2			2	ML_old_120_2
P04	0 immédiat	meaningless194	meanigless	meanigless	Old	meaningless	2	z	l	z	364	406	364	Image0243	120	Old	1	0	2	z	3			3	ML_old_120_2
P04	0 immédiat	meaningless182	meanigless	meanigless	Old	meaningless	2	e	l	e	420	973	420	Image0426	120	Old	1	0	3	e	2			2	ML_old_120_2
P04	0 immédiat	meaningless206	meanigless	meanigless	Old	meaningless	2	r	l	r	180	376	180	Image0477	120	Old	1	0	4	r	1			1	ML_old_120_2
P04	0 immédiat	meaningless214	meanigless	meanigless	Old	meaningless	2	r	l	r	323	425	323	Image0478	120	Old	1	0	4	r	1			1	ML_old_120_2
P04	0 immédiat	meaningless166	meanigless	meanigless	Old	meaningless	2	a	l	a	203	679	203	Image0494	120	Old	1	0	1	a	4			4	ML_old_120_2
P04	0 immédiat	meaningless230	meanigless	meanigless	Old	meaningless	2	e	s	e	588	1883	588	Image0542	120	Old	0	1	3			e	7	7	ML_old_120_2
P04	0 immédiat	meaningless198	meanigless	meanigless	Old	meaningless	2	r	l	r	172	853	172	Image0622	120	Old	1	0	4	r	1			1	ML_old_120_2
P04	0 immédiat	meaningless238	meanigless	meanigless	Old	meaningless	2	z	s	z	412	1596	412	Image0680	120	Old	0	1	2			z	6	6	ML_old_120_2
P04	0 immédiat	meaningless186	meanigless	meanigless	Old	meaningless	2	e	l	e	196	442	196	Image0692	120	Old	1	0	3	e	2			2	ML_old_120_2
P04	0 immédiat	meaningless218	meanigless	meanigless	Old	meaningless	2	z	s	z	964	1069	964	Image0693	120	Old	0	1	2			z	6	6	ML_old_120_2
P04	0 immédiat	meaningless170	meanigless	meanigless	Old	meaningless	2	a	s	a	364	2055	364	Image0760	120	Old	0	1	1			a	5	5	ML_old_120_2
P04	0 immédiat	meaningless202	meanigless	meanigless	Old	meaningless	2	r	l	r	212	476	212	Image1104	120	Old	1	0	4	r	1			1	ML_old_120_2
P04	0 immédiat	meaningless234	meanigless	meanigless	Old	meaningless	2	r	s	r	108	1195	108	Image1105	120	Old	0	1	4			r	8	8	ML_old_120_2
P04	0 immédiat	meaningless174	meanigless	meanigless	Old	meaningless	2	z	s	z	1452	1444	1452	Image1252	120	Old	0	1	2			z	6	6	ML_old_120_2
P04	0 immédiat	meaningless190	meanigless	meanigless	Old	meaningless	2	a	s	a	860	1277	860	Image1274	120	Old	0	1	1			a	5	5	ML_old_120_2
P04	0 immédiat	meaningless222	meanigless	meanigless	Old	meaningless	2	z	s	z	556	2276	556	Image1277	120	Old	0	1	2			z	6	6	ML_old_120_2
P04	0 immédiat	meaningless191	meanigless	meanigless	Old	meaningless	1	e	s	e	348	832	348	Image0017	1920	Old	0	1	3			e	7	7	ML_old_1920_1
P04	0 immédiat	meaningless223	meanigless	meanigless	Old	meaningless	1	e	s	e	332	633	332	Image0018	1920	Old	0	1	3			e	7	7	ML_old_1920_1
P04	0 immédiat	meaningless179	meanigless	meanigless	Old	meaningless	1	a	s	a	1092	595	1092	Image0157	1920	Old	0	1	1			a	5	5	ML_old_1920_1
P04	0 immédiat	meaningless211	meanigless	meanigless	Old	meaningless	1	e	s	e	940	2769	940	Image0162	1920	Old	0	1	3			e	7	7	ML_old_1920_1
P04	0 immédiat	meaningless163	meanigless	meanigless	Old	meaningless	1	e	l	e	1092	581	1092	Image0242	1920	Old	1	0	3	e	2			2	ML_old_1920_1
P04	0 immédiat	meaningless227	meanigless	meanigless	Old	meaningless	1	z	s	z	396	691	396	Image0246	1920	Old	0	1	2			z	6	6	ML_old_1920_1
P04	0 immédiat	meaningless195	meanigless	meanigless	Old	meaningless	1	e	s	e	156	350	156	Image0412	1920	Old	0	1	3			e	7	7	ML_old_1920_1
P04	0 immédiat	meaningless183	meanigless	meanigless	Old	meaningless	1	r	l	r	308	534	308	Image0610	1920	Old	1	0	4	r	1			1	ML_old_1920_1
P04	0 immédiat	meaningless215	meanigless	meanigless	Old	meaningless	1	r	l	r	172	344	172	Image0611	1920	Old	1	0	4	r	1			1	ML_old_1920_1
P04	0 immédiat	meaningless167	meanigless	meanigless	Old	meaningless	1	z	l	z	1364	980	1364	Image0621	1920	Old	1	0	2	z	3			3	ML_old_1920_1
P04	0 immédiat	meaningless231	meanigless	meanigless	Old	meaningless	1	e	l	e	2292	959	2292	Image0623	1920	Old	1	0	3	e	2			2	ML_old_1920_1
P04	0 immédiat	meaningless199	meanigless	meanigless	Old	meaningless	1	r	l	r	251	1112	251	Image0651	1920	Old	1	0	4	r	1			1	ML_old_1920_1
P04	0 immédiat	meaningless187	meanigless	meanigless	Old	meaningless	1	e	l	e	1635	2244	1635	Image0897	1920	Old	1	0	3	e	2			2	ML_old_1920_1
P04	0 immédiat	meaningless219	meanigless	meanigless	Old	meaningless	1	r	l	r	299	518	299	Image0916	1920	Old	1	0	4	r	1			1	ML_old_1920_1
P04	0 immédiat	meaningless171	meanigless	meanigless	Old	meaningless	1	e	l	e	860	1188	860	Image1103	1920	Old	1	0	3	e	2			2	ML_old_1920_1
P04	0 immédiat	meaningless203	meanigless	meanigless	Old	meaningless	1	e	s	e	148	523	148	Image1221	1920	Old	0	1	3			e	7	7	ML_old_1920_1
P04	0 immédiat	meaningless235	meanigless	meanigless	Old	meaningless	1	a	s	a	788	1484	788	Image1222	1920	Old	0	1	1			a	5	5	ML_old_1920_1
P04	0 immédiat	meaningless175	meanigless	meanigless	Old	meaningless	1	z	l	z	563	1865	563	R10	1920	Old	1	0	2	z	3			3	ML_old_1920_1
P04	0 immédiat	meaningless207	meanigless	meanigless	Old	meaningless	1	e	s	e	132	585	132	R11	1920	Old	0	1	3			e	7	7	ML_old_1920_1
P04	0 immédiat	meaningless239	meanigless	meanigless	Old	meaningless	1	e	l	e	955	698	955	R12	1920	Old	1	0	3	e	2			2	ML_old_1920_1
P04	0 immédiat	meaningless177	meanigless	meanigless	Old	meaningless	2	r	l	r	268	456	268	Image0070	1920	Old	1	0	4	r	1			1	ML_old_1920_2
P04	0 immédiat	meaningless209	meanigless	meanigless	Old	meaningless	2	r	l	r	331	698	331	Image0071	1920	Old	1	0	4	r	1			1	ML_old_1920_2
P04	0 immédiat	meaningless161	meanigless	meanigless	Old	meaningless	2	r	l	r	332	586	332	Image0128	1920	Old	1	0	4	r	1			1	ML_old_1920_2
P04	0 immédiat	meaningless205	meanigless	meanigless	Old	meaningless	2	r	l	r	780	4919	780	Image0129	1920	Old	1	0	4	r	1			1	ML_old_1920_2
P04	0 immédiat	meaningless225	meanigless	meanigless	Old	meaningless	2	e	s	e	148	858	148	Image0132	1920	Old	0	1	3			e	7	7	ML_old_1920_2
P04	0 immédiat	meaningless193	meanigless	meanigless	Old	meaningless	2	r	l	r	140	437	140	Image0178	1920	Old	1	0	4	r	1			1	ML_old_1920_2
P04	0 immédiat	meaningless181	meanigless	meanigless	Old	meaningless	2	r	l	r	429	1772	429	Image0344	1920	Old	1	0	4	r	1			1	ML_old_1920_2
P04	0 immédiat	meaningless213	meanigless	meanigless	Old	meaningless	2	r	l	r	516	2280	516	Image0348	1920	Old	1	0	4	r	1			1	ML_old_1920_2
P04	0 immédiat	meaningless173	meanigless	meanigless	Old	meaningless	2	r	l	r	348	544	348	Image0425	1920	Old	1	0	4	r	1			1	ML_old_1920_2
P04	0 immédiat	meaningless237	meanigless	meanigless	Old	meaningless	2	e	s	e	140	790	140	Image0427	1920	Old	0	1	3			e	7	7	ML_old_1920_2
P04	0 immédiat	meaningless165	meanigless	meanigless	Old	meaningless	2	r	l	r	396	690	396	Image0461	1920	Old	1	0	4	r	1			1	ML_old_1920_2
P04	0 immédiat	meaningless229	meanigless	meanigless	Old	meaningless	2	r	l	r	1092	436	1092	Image0465	1920	Old	1	0	4	r	1			1	ML_old_1920_2
P04	0 immédiat	meaningless197	meanigless	meanigless	Old	meaningless	2	z	s	z	724	1285	724	Image0501	1920	Old	0	1	2			z	6	6	ML_old_1920_2
P04	0 immédiat	meaningless185	meanigless	meanigless	Old	meaningless	2	r	l	r	204	324	204	Image0665	1920	Old	1	0	4	r	1			1	ML_old_1920_2
P04	0 immédiat	meaningless217	meanigless	meanigless	Old	meaningless	2	r	l	r	211	451	211	Image0666	1920	Old	1	0	4	r	1			1	ML_old_1920_2
P04	0 immédiat	meaningless169	meanigless	meanigless	Old	meaningless	2	r	l	r	692	514	692	Image0676	1920	Old	1	0	4	r	1			1	ML_old_1920_2
P04	0 immédiat	meaningless201	meanigless	meanigless	Old	meaningless	2	z	s	z	676	2491	676	Image0764	1920	Old	0	1	2			z	6	6	ML_old_1920_2
P04	0 immédiat	meaningless233	meanigless	meanigless	Old	meaningless	2	r	l	r	332	496	332	Image0785	1920	Old	1	0	4	r	1			1	ML_old_1920_2
P04	0 immédiat	meaningless189	meanigless	meanigless	Old	meaningless	2	r	l	r	197	425	197	Image1235	1920	Old	1	0	4	r	1			1	ML_old_1920_2
P04	0 immédiat	meaningless221	meanigless	meanigless	Old	meaningless	2	e	l	e	483	1235	483	Image1236	1920	Old	1	0	3	e	2			2	ML_old_1920_2
P05	0 immédiat	animal13	chenille	animal	Old	meaningfull	1	r	l	r	372	312	372	gist013_2	120	Old	1	0	4	r	1			1	MF_old_120_1
P05	0 immédiat	animal22	elephant	animal	Old	meaningfull	1	r	l	r	412	649	412	gist022_2	120	Old	1	0	4	r	1			1	MF_old_120_1
P05	0 immédiat	animal33	panthÃ¨re	animal	Old	meaningfull	1	r	l	r	404	609	404	gist033_1	120	Old	1	0	4	r	1			1	MF_old_120_1
P05	0 immédiat	animal41	oxyx	animal	Old	meaningfull	1	r	l	r	444	479	444	gist041_2	120	Old	1	0	4	r	1			1	MF_old_120_1
P05	0 immédiat	animal48	ecureuil	animal	Old	meaningfull	1	r	s	r	740	502	740	gist048_1	120	Old	0	1	4			r	8	8	MF_old_120_1
P05	0 immédiat	animal56	gorille	animal	Old	meaningfull	1	r	l	r	428	499	428	gist056_1	120	Old	1	0	4	r	1			1	MF_old_120_1
P05	0 immédiat	animal77	flaman rose	animal	Old	meaningfull	1	r	l	r	292	366	292	gist077_1	120	Old	1	0	4	r	1			1	MF_old_120_1
P05	0 immédiat	paysage4	rocher	paysage	Old	meaningfull	1	e	l	e	412	475	412	gist104_2	120	Old	1	0	3	e	2			2	MF_old_120_1
P05	0 immédiat	paysage16	champ de fleur	paysage	Old	meaningfull	1	r	l	r	565	2188	565	gist116_1	120	Old	1	0	4	r	1			1	MF_old_120_1
P05	0 immédiat	paysage25	route	paysage	Old	meaningfull	1	r	s	r	644	362	644	gist125_10	120	Old	0	1	4			r	8	8	MF_old_120_1
P05	0 immédiat	objet isole3	brosse Ã dent	objet isole	Old	meaningfull	1	r	l	r	452	358	452	gist153_1	120	Old	1	0	4	r	1			1	MF_old_120_1
P05	0 immédiat	objet isole11	toune_visse	objet isole	Old	meaningfull	1	r	l	r	388	361	388	gist160_1	120	Old	1	0	4	r	1			1	MF_old_120_1
P05	0 immédiat	objet isole22	raquette	objet isole	Old	meaningfull	1	r	l	r	300	435	300	gist171_1	120	Old	1	0	4	r	1			1	MF_old_120_1
P05	0 immédiat	objet isole28	cle	objet isole	Old	meaningfull	1	r	l	r	802	1666	802	gist177_1	120	Old	1	0	4	r	1			1	MF_old_120_1
P05	0 immédiat	fuit/legumes isoles5	raisin	fruits/legumes	Old	meaningfull	1	r	l	r	540	395	540	gist405_1	120	Old	1	0	4	r	1			1	MF_old_120_1
P05	0 immédiat	fuit/legumes isoles28	cookies	fruits/legumes	Old	meaningfull	1	r	l	r	340	326	340	gist428_2	120	Old	1	0	4	r	1			1	MF_old_120_1
P05	0 immédiat	fuit/legumes isoles34	mur	fruits/legumes	Old	meaningfull	1	r	l	r	372	383	372	gist434_2	120	Old	1	0	4	r	1			1	MF_old_120_1
P05	0 immédiat	fuit/legumes isoles43	cafe	fruits/legumes	Old	meaningfull	1	r	l	r	612	397	612	gist443_2	120	Old	1	0	4	r	1			1	MF_old_120_1
P05	0 immédiat	fuit/legumes isoles52	datte	fruits/legumes	Old	meaningfull	1	r	l	r	308	309	308	gist452_3	120	Old	1	0	4	r	1			1	MF_old_120_1
P05	0 immédiat	fuit/legumes isoles60	carotte	fruits/legumes	Old	meaningfull	1	r	l	r	412	403	412	gist462_1	120	Old	1	0	4	r	1			1	MF_old_120_1
P05	0 immédiat	animal6	grenouille	animal	Old	meaningfull	2	r	l	r	500	362	500	gist006_1	120	Old	1	0	4	r	1			1	MF_old_120_2
P05	0 immédiat	animal18	ours polaire	animal	Old	meaningfull	2	r	l	r	412	606	412	gist018_2	120	Old	1	0	4	r	1			1	MF_old_120_2
P05	0 immédiat	animal30	chien	animal	Old	meaningfull	2	r	l	r	348	270	348	gist030_1	120	Old	1	0	4	r	1			1	MF_old_120_2
P05	0 immédiat	animal38	zebre	animal	Old	meaningfull	2	r	l	r	548	356	548	gist038_1	120	Old	1	0	4	r	1			1	MF_old_120_2
P05	0 immédiat	animal44	vache	animal	Old	meaningfull	2	r	l	r	428	491	428	gist044_2	120	Old	1	0	4	r	1			1	MF_old_120_2
P05	0 immédiat	animal53	bison	animal	Old	meaningfull	2	r	l	r	404	557	404	gist053_1	120	Old	1	0	4	r	1			1	MF_old_120_2
P05	0 immédiat	animal62	ane	animal	Old	meaningfull	2	r	l	r	476	362	476	gist062_1	120	Old	1	0	4	r	1			1	MF_old_120_2
P05	0 immédiat	animal80	coq	animal	Old	meaningfull	2	r	l	r	363	298	363	gist080_1	120	Old	1	0	4	r	1			1	MF_old_120_2
P05	0 immédiat	paysage11	montagne	paysage	Old	meaningfull	2	r	s	r	540	642	540	gist111_1	120	Old	0	1	4			r	8	8	MF_old_120_2
P05	0 immédiat	paysage20	champ	paysage	Old	meaningfull	2	r	l	r	500	522	500	gist120_1	120	Old	1	0	4	r	1			1	MF_old_120_2
P05	0 immédiat	paysage25	route	paysage	Old	meaningfull	2	r	s	r	492	292	492	gist125_4	120	Old	0	1	4			r	8	8	MF_old_120_2
P05	0 immédiat	objet isole5	eponde	objet isole	Old	meaningfull	2	r	l	r	276	351	276	gist155_1	120	Old	1	0	4	r	1			1	MF_old_120_2
P05	0 immédiat	objet isole14	pince Ã linge	objet isole	Old	meaningfull	2	r	l	r	340	327	340	gist163_1	120	Old	1	0	4	r	1			1	MF_old_120_2
P05	0 immédiat	objet isole24	pince	objet isole	Old	meaningfull	2	r	l	r	405	310	405	gist173_1	120	Old	1	0	4	r	1			1	MF_old_120_2
P05	0 immédiat	fuit/legumes isoles1	pomme	fruits/legumes	Old	meaningfull	2	e	l	e	476	4445	476	gist401_1	120	Old	1	0	3	e	2			2	MF_old_120_2
P05	0 immédiat	fuit/legumes isoles18	champignion	fruits/legumes	Old	meaningfull	2	r	l	r	548	398	548	gist418_2	120	Old	1	0	4	r	1			1	MF_old_120_2
P05	0 immédiat	fuit/legumes isoles32	cacahouette	fruits/legumes	Old	meaningfull	2	r	l	r	331	340	331	gist432_2	120	Old	1	0	4	r	1			1	MF_old_120_2
P05	0 immédiat	fuit/legumes isoles39	poulet	fruits/legumes	Old	meaningfull	2	r	l	r	788	820	788	gist439_2	120	Old	1	0	4	r	1			1	MF_old_120_2
P05	0 immédiat	fuit/legumes isoles47	avocat	fruits/legumes	Old	meaningfull	2	r	l	r	532	425	532	gist448_1	120	Old	1	0	4	r	1			1	MF_old_120_2
P05	0 immédiat	fuit/legumes isoles58	croissant	fruits/legumes	Old	meaningfull	2	r	l	r	436	367	436	gist460_1	120	Old	1	0	4	r	1			1	MF_old_120_2
P05	0 immédiat	animal8	tortue	animal	Old	meaningfull	1	r	l	r	508	692	508	gist008_1	1920	Old	1	0	4	r	1			1	MF_old_1920_1
P05	0 immédiat	animal21	rinoceroce	animal	Old	meaningfull	1	r	l	r	323	387	323	gist021_1	1920	Old	1	0	4	r	1			1	MF_old_1920_1
P05	0 immédiat	animal31	loup	animal	Old	meaningfull	1	r	l	r	436	471	436	gist031_1	1920	Old	1	0	4	r	1			1	MF_old_1920_1
P05	0 immédiat	animal40	cerf	animal	Old	meaningfull	1	r	l	r	460	553	460	gist040_2	1920	Old	1	0	4	r	1			1	MF_old_1920_1
P05	0 immédiat	animal45	kangourou	animal	Old	meaningfull	1	r	l	r	396	348	396	gist045_1	1920	Old	1	0	4	r	1			1	MF_old_1920_1
P05	0 immédiat	animal54	mouton	animal	Old	meaningfull	1	r	l	r	372	279	372	gist054_1	1920	Old	1	0	4	r	1			1	MF_old_1920_1
P05	0 immédiat	animal67	pinguin	animal	Old	meaningfull	1	r	l	r	2628	68	2628	gist067_1	1920	Old	1	0	4	r	1			1	MF_old_1920_1
P05	0 immédiat	paysage2	plage	paysage	Old	meaningfull	1	r	l	r	364	347	364	gist102_1	1920	Old	1	0	4	r	1			1	MF_old_1920_1
P05	0 immédiat	paysage13	desert:steppe	paysage	Old	meaningfull	1	r	l	r	420	494	420	gist113_2	1920	Old	1	0	4	r	1			1	MF_old_1920_1
P05	0 immédiat	paysage25	route	paysage	Old	meaningfull	1	r	l	r	372	323	372	gist125_1	1920	Old	1	0	4	r	1			1	MF_old_1920_1
P05	0 immédiat	paysage25	route	paysage	Old	meaningfull	1	r	l	r	429	379	429	gist125_8	1920	Old	1	0	4	r	1			1	MF_old_1920_1
P05	0 immédiat	objet isole8	epingles nourisse	objet isole	Old	meaningfull	1	r	l	r	500	377	500	gist157_2	1920	Old	1	0	4	r	1			1	MF_old_1920_1
P05	0 immédiat	objet isole16	couverts	objet isole	Old	meaningfull	1	r	l	r	324	373	324	gist165_1	1920	Old	1	0	4	r	1			1	MF_old_1920_1
P05	0 immédiat	objet isole26	scie	objet isole	Old	meaningfull	1	r	l	r	308	359	308	gist175_1	1920	Old	1	0	4	r	1			1	MF_old_1920_1
P05	0 immédiat	fuit/legumes isoles3	orange	fruits/legumes	Old	meaningfull	1	r	l	r	268	344	268	gist403_2	1920	Old	1	0	4	r	1			1	MF_old_1920_1
P05	0 immédiat	fuit/legumes isoles19	tomate	fruits/legumes	Old	meaningfull	1	r	l	r	428	387	428	gist419_1	1920	Old	1	0	4	r	1			1	MF_old_1920_1
P05	0 immédiat	fuit/legumes isoles33	myrtille	fruits/legumes	Old	meaningfull	1	r	l	r	420	469	420	gist433_2	1920	Old	1	0	4	r	1			1	MF_old_1920_1
P05	0 immédiat	fuit/legumes isoles40	jambon	fruits/legumes	Old	meaningfull	1	r	l	r	388	337	388	gist440_2	1920	Old	1	0	4	r	1			1	MF_old_1920_1
P05	0 immédiat	fuit/legumes isoles51	blette	fruits/legumes	Old	meaningfull	1	r	l	r	356	596	356	gist451_2	1920	Old	1	0	4	r	1			1	MF_old_1920_1
P05	0 immédiat	fuit/legumes isoles59	radis	fruits/legumes	Old	meaningfull	1	r	l	r	732	962	732	gist461_1	1920	Old	1	0	4	r	1			1	MF_old_1920_1
P05	0 immédiat	animal5	papillon	animal	Old	meaningfull	2	r	l	r	980	720	980	gist005_1	1920	Old	1	0	4	r	1			1	MF_old_1920_2
P05	0 immédiat	animal17	dauphin	animal	Old	meaningfull	2	r	l	r	372	429	372	gist017_2	1920	Old	1	0	4	r	1			1	MF_old_1920_2
P05	0 immédiat	animal26	ours	animal	Old	meaningfull	2	r	l	r	460	345	460	gist026_2	1920	Old	1	0	4	r	1			1	MF_old_1920_2
P05	0 immédiat	animal35	tigre	animal	Old	meaningfull	2	r	l	r	332	310	332	gist035_2	1920	Old	1	0	4	r	1			1	MF_old_1920_2
P05	0 immédiat	animal42	giraffe	animal	Old	meaningfull	2	r	l	r	460	389	460	gist042_3	1920	Old	1	0	4	r	1			1	MF_old_1920_2
P05	0 immédiat	animal52	bouc	animal	Old	meaningfull	2	r	l	r	508	355	508	gist052_2	1920	Old	1	0	4	r	1			1	MF_old_1920_2
P05	0 immédiat	animal60	panthÃ¨re noire	animal	Old	meaningfull	2	r	l	r	596	386	596	gist060_2	1920	Old	1	0	4	r	1			1	MF_old_1920_2
P05	0 immédiat	animal79	cigogne	animal	Old	meaningfull	2	r	l	r	484	464	484	gist079_1	1920	Old	1	0	4	r	1			1	MF_old_1920_2
P05	0 immédiat	paysage7	foret	paysage	Old	meaningfull	2	r	l	r	340	592	340	gist107_1	1920	Old	1	0	4	r	1			1	MF_old_1920_2
P05	0 immédiat	paysage19	champ	paysage	Old	meaningfull	2	r	l	r	508	353	508	gist119_1	1920	Old	1	0	4	r	1			1	MF_old_1920_2
P05	0 immédiat	paysage25	route	paysage	Old	meaningfull	2	r	l	r	573	485	573	gist125_2	1920	Old	1	0	4	r	1			1	MF_old_1920_2
P05	0 immédiat	objet isole4	peigne	objet isole	Old	meaningfull	2	r	l	r	548	277	548	gist154_1	1920	Old	1	0	4	r	1			1	MF_old_1920_2
P05	0 immédiat	objet isole13	ciseau	objet isole	Old	meaningfull	2	r	l	r	389	326	389	gist162_1	1920	Old	1	0	4	r	1			1	MF_old_1920_2
P05	0 immédiat	objet isole23	des	objet isole	Old	meaningfull	2	r	l	r	332	314	332	gist172_1	1920	Old	1	0	4	r	1			1	MF_old_1920_2
P05	0 immédiat	objet isole31	spatule	objet isole	Old	meaningfull	2	r	l	r	364	416	364	gist180_1	1920	Old	1	0	4	r	1			1	MF_old_1920_2
P05	0 immédiat	fuit/legumes isoles9	pasteque	fruits/legumes	Old	meaningfull	2	r	l	r	380	286	380	gist409_1	1920	Old	1	0	4	r	1			1	MF_old_1920_2
P05	0 immédiat	fuit/legumes isoles30	choux	fruits/legumes	Old	meaningfull	2	r	l	r	500	387	500	gist430_2	1920	Old	1	0	4	r	1			1	MF_old_1920_2
P05	0 immédiat	fuit/legumes isoles36	paplemousse	fruits/legumes	Old	meaningfull	2	r	l	r	396	299	396	gist436_2	1920	Old	1	0	4	r	1			1	MF_old_1920_2
P05	0 immédiat	fuit/legumes isoles45	haricot	fruits/legumes	Old	meaningfull	2	r	l	r	388	373	388	gist446_2	1920	Old	1	0	4	r	1			1	MF_old_1920_2
P05	0 immédiat	fuit/legumes isoles56	poivron	fruits/legumes	Old	meaningfull	2	r	l	r	340	280	340	gist457_1	1920	Old	1	0	4	r	1			1	MF_old_1920_2
P05	0 immédiat	animal15	poisson	animal	New-oldGist	meaningfull	1	r	l	r	388	316	388	gist015_2	120	R-gist	1	0	4	r	1			1	MF_N_oldGist_120_1
P05	0 immédiat	animal47	chevre	animal	New-oldGist	meaningfull	1	r	l	r	515	350	515	gist047_2	120	R-gist	1	0	4	r	1			1	MF_N_oldGist_120_1
P05	0 immédiat	animal78	casoar	animal	New-oldGist	meaningfull	1	e	l	e	404	3412	404	gist078_2	120	R-gist	1	0	3	e	2			2	MF_N_oldGist_120_1
P05	0 immédiat	paysage15	fond marin	paysage	New-oldGist	meaningfull	1	r	l	r	428	580	428	gist115_2	120	R-gist	1	0	4	r	1			1	MF_N_oldGist_120_1
P05	0 immédiat	paysage25	route	paysage	New-oldGist	meaningfull	1	e	l	e	492	2135	492	gist125_7	120	R-gist	1	0	3	e	2			2	MF_N_oldGist_120_1
P05	0 immédiat	objet isole1	balle	objet isole	New-oldGist	meaningfull	1	r	l	r	412	404	412	gist151_2	120	R-gist	1	0	4	r	1			1	MF_N_oldGist_120_1
P05	0 immédiat	objet isole17	compa	objet isole	New-oldGist	meaningfull	1	r	l	r	268	354	268	gist166_2	120	R-gist	1	0	4	r	1			1	MF_N_oldGist_120_1
P05	0 immédiat	fuit/legumes isoles22	mais	fruits/legumes	New-oldGist	meaningfull	1	r	l	r	372	347	372	gist422_3	120	R-gist	1	0	4	r	1			1	MF_N_oldGist_120_1
P05	0 immédiat	fuit/legumes isoles38	brocoli	fruits/legumes	New-oldGist	meaningfull	1	r	l	r	371	366	371	gist438_3	120	R-gist	1	0	4	r	1			1	MF_N_oldGist_120_1
P05	0 immédiat	fuit/legumes isoles57	pizza	fruits/legumes	New-oldGist	meaningfull	1	r	l	r	524	535	524	gist459_2	120	R-gist	1	0	4	r	1			1	MF_N_oldGist_120_1
P05	0 immédiat	animal3	sauterelle	animal	New-oldGist	meaningfull	2	r	l	r	460	323	460	gist003_1	120	R-gist	1	0	4	r	1			1	MF_N_oldGist_120_2
P05	0 immédiat	animal39	cheval	animal	New-oldGist	meaningfull	2	r	l	r	356	393	356	gist039_1	120	R-gist	1	0	4	r	1			1	MF_N_oldGist_120_2
P05	0 immédiat	animal75	perroquet	animal	New-oldGist	meaningfull	2	r	l	r	323	456	323	gist075_2	120	R-gist	1	0	4	r	1			1	MF_N_oldGist_120_2
P05	0 immédiat	paysage8	grand canyon	paysage	New-oldGist	meaningfull	2	r	l	r	372	656	372	gist108_2	120	R-gist	1	0	4	r	1			1	MF_N_oldGist_120_2
P05	0 immédiat	paysage23	cascade	paysage	New-oldGist	meaningfull	2	r	l	r	532	665	532	gist123_2	120	R-gist	1	0	4	r	1			1	MF_N_oldGist_120_2
P05	0 immédiat	paysage28	farwest	paysage	New-oldGist	meaningfull	2	r	l	r	548	524	548	gist128_2	120	R-gist	1	0	4	r	1			1	MF_N_oldGist_120_2
P05	0 immédiat	objet isole10	marteau	objet isole	New-oldGist	meaningfull	2	r	l	r	380	362	380	gist159_2	120	R-gist	1	0	4	r	1			1	MF_N_oldGist_120_2
P05	0 immédiat	fuit/legumes isoles4	banane	fruits/legumes	New-oldGist	meaningfull	2	r	l	r	428	307	428	gist404_3	120	R-gist	1	0	4	r	1			1	MF_N_oldGist_120_2
P05	0 immédiat	fuit/legumes isoles27	pain	fruits/legumes	New-oldGist	meaningfull	2	r	l	r	372	375	372	gist427_2	120	R-gist	1	0	4	r	1			1	MF_N_oldGist_120_2
P05	0 immédiat	fuit/legumes isoles46	Å“uf	fruits/legumes	New-oldGist	meaningfull	2	r	l	r	420	353	420	gist447_2	120	R-gist	1	0	4	r	1			1	MF_N_oldGist_120_2
P05	0 immédiat	animal4	champigon	animal	New-oldGist	meaningfull	1	r	l	r	500	450	500	gist004_1	1920	R-gist	1	0	4	r	1			1	MF_N_oldGist_1920_1
P05	0 immédiat	animal43	chameau	animal	New-oldGist	meaningfull	1	r	l	r	356	321	356	gist043_2	1920	R-gist	1	0	4	r	1			1	MF_N_oldGist_1920_1
P05	0 immédiat	animal76	paon	animal	New-oldGist	meaningfull	1	r	l	r	404	433	404	gist076_2	1920	R-gist	1	0	4	r	1			1	MF_N_oldGist_1920_1
P05	0 immédiat	paysage9	montagne eneige	paysage	New-oldGist	meaningfull	1	r	l	r	524	484	524	gist109_2	1920	R-gist	1	0	4	r	1			1	MF_N_oldGist_1920_1
P05	0 immédiat	paysage25	route	paysage	New-oldGist	meaningfull	1	r	l	r	476	624	476	gist125_6	1920	R-gist	1	0	4	r	1			1	MF_N_oldGist_1920_1
P05	0 immédiat	paysage30	grotte	paysage	New-oldGist	meaningfull	1	r	l	r	452	385	452	gist130_2	1920	R-gist	1	0	4	r	1			1	MF_N_oldGist_1920_1
P05	0 immédiat	objet isole12	pinceau	objet isole	New-oldGist	meaningfull	1	r	l	r	356	434	356	gist161_2	1920	R-gist	1	0	4	r	1			1	MF_N_oldGist_1920_1
P05	0 immédiat	fuit/legumes isoles6	noix de coco	fruits/legumes	New-oldGist	meaningfull	1	r	l	r	468	341	468	gist406_1	1920	R-gist	1	0	4	r	1			1	MF_N_oldGist_1920_1
P05	0 immédiat	fuit/legumes isoles37	pÃªche	fruits/legumes	New-oldGist	meaningfull	1	r	l	r	412	255	412	gist437_3	1920	R-gist	1	0	4	r	1			1	MF_N_oldGist_1920_1
P05	0 immédiat	fuit/legumes isoles49	kaki	fruits/legumes	New-oldGist	meaningfull	1	r	l	r	444	632	444	gist449_2	1920	R-gist	1	0	4	r	1			1	MF_N_oldGist_1920_1
P05	0 immédiat	animal1	escargot	animal	New-oldGist	meaningfull	2	r	l	r	348	457	348	gist001_2	1920	R-gist	1	0	4	r	1			1	MF_N_oldGist_1920_2
P05	0 immédiat	animal16	phoque	animal	New-oldGist	meaningfull	2	r	l	r	340	412	340	gist016_2	1920	R-gist	1	0	4	r	1			1	MF_N_oldGist_1920_2
P05	0 immédiat	animal68	cygne	animal	New-oldGist	meaningfull	2	r	l	r	363	799	363	gist068_2	1920	R-gist	1	0	4	r	1			1	MF_N_oldGist_1920_2
P05	0 immédiat	paysage1	ciel	paysage	New-oldGist	meaningfull	2	r	l	r	348	525	348	gist101_2	1920	R-gist	1	0	4	r	1			1	MF_N_oldGist_1920_2
P05	0 immédiat	paysage17	banquise	paysage	New-oldGist	meaningfull	2	r	l	r	348	434	348	gist117_1	1920	R-gist	1	0	4	r	1			1	MF_N_oldGist_1920_2
P05	0 immédiat	paysage27	fougÃ¨re	paysage	New-oldGist	meaningfull	2	r	l	r	396	323	396	gist127_2	1920	R-gist	1	0	4	r	1			1	MF_N_oldGist_1920_2
P05	0 immédiat	objet isole2	brosse	objet isole	New-oldGist	meaningfull	2	r	l	r	388	310	388	gist152_2	1920	R-gist	1	0	4	r	1			1	MF_N_oldGist_1920_2
P05	0 immédiat	fuit/legumes isoles2	poire	fruits/legumes	New-oldGist	meaningfull	2	r	l	r	540	792	540	gist402_1	1920	R-gist	1	0	4	r	1			1	MF_N_oldGist_1920_2
P05	0 immédiat	fuit/legumes isoles26	fromage	fruits/legumes	New-oldGist	meaningfull	2	r	l	r	412	325	412	gist426_2	1920	R-gist	1	0	4	r	1			1	MF_N_oldGist_1920_2
P05	0 immédiat	fuit/legumes isoles42	steak	fruits/legumes	New-oldGist	meaningfull	2	r	l	r	436	354	436	gist442_2	1920	R-gist	1	0	4	r	1			1	MF_N_oldGist_1920_2
P05	0 immédiat	animal11	varan	animal	New	meaningfull	0	r	s	r	412	360	412	gist011_1		R-newgist	0	1	4			r	8	8	MF_new
P05	0 immédiat	animal12	punaise	animal	New	meaningfull	0	r	s	r	404	411	404	gist012_1		R-newgist	0	1	4			r	8	8	MF_new
P05	0 immédiat	animal14	libellule	animal	New	meaningfull	0	e	s	e	523	2080	523	gist014_1		R-newgist	0	1	3			e	7	7	MF_new
P05	0 immédiat	animal19	orque	animal	New	meaningfull	0	r	s	r	484	421	484	gist019_1		R-newgist	0	1	4			r	8	8	MF_new
P05	0 immédiat	animal23	buffle	animal	New	meaningfull	0	r	s	r	460	635	460	gist023_1		R-newgist	0	1	4			r	8	8	MF_new
P05	0 immédiat	animal24	hippopotame	animal	New	meaningfull	0	r	s	r	524	488	524	gist024_1		R-newgist	0	1	4			r	8	8	MF_new
P05	0 immédiat	animal32	renard	animal	New	meaningfull	0	r	s	r	492	857	492	gist032_1		R-newgist	0	1	4			r	8	8	MF_new
P05	0 immédiat	animal34	lion	animal	New	meaningfull	0	r	s	r	708	666	708	gist034_4		R-newgist	0	1	4			r	8	8	MF_new
P05	0 immédiat	animal36	chat	animal	New	meaningfull	0	r	s	r	412	350	412	gist036_2		R-newgist	0	1	4			r	8	8	MF_new
P05	0 immédiat	animal46	leopard	animal	New	meaningfull	0	r	s	r	684	336	684	gist046_2		R-newgist	0	1	4			r	8	8	MF_new
P05	0 immédiat	animal120	blereau	animal	New	meaningfull	0	r	s	r	371	335	371	gist050_2		R-newgist	0	1	4			r	8	8	MF_new
P05	0 immédiat	animal55	singe	animal	New	meaningfull	0	r	s	r	500	315	500	gist055_1		R-newgist	0	1	4			r	8	8	MF_new
P05	0 immédiat	animal66	autruche	animal	New	meaningfull	0	r	s	r	580	450	580	gist066_1		R-newgist	0	1	4			r	8	8	MF_new
P05	0 immédiat	animal69	oiseau	animal	New	meaningfull	0	r	s	r	484	365	484	gist069_1		R-newgist	0	1	4			r	8	8	MF_new
P05	0 immédiat	animal71	oie	animal	New	meaningfull	0	r	s	r	388	406	388	gist071_1		R-newgist	0	1	4			r	8	8	MF_new
P05	0 immédiat	animal72	oiseau2	animal	New	meaningfull	0	r	s	r	483	393	483	gist072_1		R-newgist	0	1	4			r	8	8	MF_new
P05	0 immédiat	paysage5	coucher de soleil	paysage	New	meaningfull	0	r	s	r	484	382	484	gist105_1		R-newgist	0	1	4			r	8	8	MF_new
P05	0 immédiat	paysage7	foret	paysage	New	meaningfull	0	r	s	r	372	394	372	gist107_2		R-newgist	0	1	4			r	8	8	MF_new
P05	0 immédiat	paysage10	montagne	paysage	New	meaningfull	0	r	s	r	500	375	500	gist110_1		R-newgist	0	1	4			r	8	8	MF_new
P05	0 immédiat	paysage18	neige	paysage	New	meaningfull	0	r	s	r	564	510	564	gist118_1		R-newgist	0	1	4			r	8	8	MF_new
P05	0 immédiat	paysage22	mer/montagne	paysage	New	meaningfull	0	r	s	r	660	564	660	gist122_1		R-newgist	0	1	4			r	8	8	MF_new
P05	0 immédiat	paysage26	desert	paysage	New	meaningfull	0	r	s	r	732	393	732	gist126_1		R-newgist	0	1	4			r	8	8	MF_new
P05	0 immédiat	objet isole7	trombone	objet isole	New	meaningfull	0	r	s	r	540	431	540	gist157_1		R-newgist	0	1	4			r	8	8	MF_new
P05	0 immédiat	objet isole9	fil	objet isole	New	meaningfull	0	r	s	r	612	377	612	gist158_1		R-newgist	0	1	4			r	8	8	MF_new
P05	0 immédiat	objet isole15	crayon	objet isole	New	meaningfull	0	r	s	r	444	521	444	gist164_1		R-newgist	0	1	4			r	8	8	MF_new
P05	0 immédiat	objet isole27	pioche	objet isole	New	meaningfull	0	r	s	r	492	406	492	gist176_1		R-newgist	0	1	4			r	8	8	MF_new
P05	0 immédiat	objet isole29	mÃ¨che	objet isole	New	meaningfull	0	r	s	r	308	368	308	gist178_1		R-newgist	0	1	4			r	8	8	MF_new
P05	0 immédiat	objet isole30	niveau	objet isole	New	meaningfull	0	r	s	r	436	644	436	gist179_1		R-newgist	0	1	4			r	8	8	MF_new
P05	0 immédiat	fuit/legumes isoles11	kiwi	fruits/legumes	New	meaningfull	0	r	s	r	548	815	548	gist411_1		R-newgist	0	1	4			r	8	8	MF_new
P05	0 immédiat	fuit/legumes isoles13	citron vert	fruits/legumes	New	meaningfull	0	r	s	r	588	429	588	gist413_1		R-newgist	0	1	4			r	8	8	MF_new
P05	0 immédiat	fuit/legumes isoles15	amande	fruits/legumes	New	meaningfull	0	r	s	r	764	3641	764	gist415_2		R-newgist	0	1	4			r	8	8	MF_new
P05	0 immédiat	fuit/legumes isoles16	litchi	fruits/legumes	New	meaningfull	0	r	s	r	483	480	483	gist416_1		R-newgist	0	1	4			r	8	8	MF_new
P05	0 immédiat	fuit/legumes isoles17	melon	fruits/legumes	New	meaningfull	0	r	s	r	460	317	460	gist417_1		R-newgist	0	1	4			r	8	8	MF_new
P05	0 immédiat	fuit/legumes isoles20	courgette	fruits/legumes	New	meaningfull	0	r	s	r	380	347	380	gist420_1		R-newgist	0	1	4			r	8	8	MF_new
P05	0 immédiat	fuit/legumes isoles21	framboise	fruits/legumes	New	meaningfull	0	r	s	r	460	345	460	gist421_1		R-newgist	0	1	4			r	8	8	MF_new
P05	0 immédiat	fuit/legumes isoles23	gateau	fruits/legumes	New	meaningfull	0	r	s	r	588	485	588	gist423_2		R-newgist	0	1	4			r	8	8	MF_new
P05	0 immédiat	fuit/legumes isoles24	hotdog	fruits/legumes	New	meaningfull	0	r	s	r	596	519	596	gist424_2		R-newgist	0	1	4			r	8	8	MF_new
P05	0 immédiat	fuit/legumes isoles35	patate	fruits/legumes	New	meaningfull	0	e	s	e	492	1221	492	gist435_2		R-newgist	0	1	3			e	7	7	MF_new
P05	0 immédiat	fuit/legumes isoles44	noisette	fruits/legumes	New	meaningfull	0	r	s	r	532	316	532	gist444_2		R-newgist	0	1	4			r	8	8	MF_new
P05	0 immédiat	fuit/legumes isoles48	figue	fruits/legumes	New	meaningfull	0	r	s	r	589	635	589	gist448_3		R-newgist	0	1	4			r	8	8	MF_new
P05	0 immédiat	meaningless091	meanigless	meanigless	New	meaningless	0	r	s	r	387	415	387	Image0007		New	0	1	4			r	8	8	ML_new
P05	0 immédiat	meaningless109	meanigless	meanigless	New	meaningless	0	r	s	r	436	468	436	Image0008		New	0	1	4			r	8	8	ML_new
P05	0 immédiat	meaningless127	meanigless	meanigless	New	meaningless	0	r	s	r	540	449	540	Image0011		New	0	1	4			r	8	8	ML_new
P05	0 immédiat	meaningless159	meanigless	meanigless	New	meaningless	0	r	s	r	627	463	627	Image0016		New	0	1	4			r	8	8	ML_new
P05	0 immédiat	meaningless145	meanigless	meanigless	New	meaningless	0	r	s	r	596	361	596	Image0069		New	0	1	4			r	8	8	ML_new
P05	0 immédiat	meaningless092	meanigless	meanigless	New	meaningless	0	r	s	r	460	520	460	Image0084		New	0	1	4			r	8	8	ML_new
P05	0 immédiat	meaningless110	meanigless	meanigless	New	meaningless	0	r	s	r	492	445	492	Image0085		New	0	1	4			r	8	8	ML_new
P05	0 immédiat	meaningless141	meanigless	meanigless	New	meaningless	0	r	s	r	476	327	476	Image0086		New	0	1	4			r	8	8	ML_new
P05	0 immédiat	meaningless160	meanigless	meanigless	New	meaningless	0	r	s	r	564	509	564	Image0089		New	0	1	4			r	8	8	ML_new
P05	0 immédiat	meaningless146	meanigless	meanigless	New	meaningless	0	r	s	r	1772	717	1772	Image0103		New	0	1	4			r	8	8	ML_new
P05	0 immédiat	meaningless093	meanigless	meanigless	New	meaningless	0	r	s	r	652	605	652	Image0119		New	0	1	4			r	8	8	ML_new
P05	0 immédiat	meaningless111	meanigless	meanigless	New	meaningless	0	r	s	r	364	337	364	Image0122		New	0	1	4			r	8	8	ML_new
P05	0 immédiat	meaningless128	meanigless	meanigless	New	meaningless	0	r	s	r	556	432	556	Image0123		New	0	1	4			r	8	8	ML_new
P05	0 immédiat	meaningless147	meanigless	meanigless	New	meaningless	0	r	s	r	595	467	595	Image0155		New	0	1	4			r	8	8	ML_new
P05	0 immédiat	meaningless094	meanigless	meanigless	New	meaningless	0	r	s	r	428	618	428	Image0171		New	0	1	4			r	8	8	ML_new
P05	0 immédiat	meaningless112	meanigless	meanigless	New	meaningless	0	r	s	r	812	650	812	Image0172		New	0	1	4			r	8	8	ML_new
P05	0 immédiat	meaningless129	meanigless	meanigless	New	meaningless	0	r	s	r	819	518	819	Image0174		New	0	1	4			r	8	8	ML_new
P05	0 immédiat	meaningless105	meanigless	meanigless	New	meaningless	0	r	s	r	908	471	908	Image0201		New	0	1	4			r	8	8	ML_new
P05	0 immédiat	meaningless123	meanigless	meanigless	New	meaningless	0	r	s	r	428	312	428	Image0202		New	0	1	4			r	8	8	ML_new
P05	0 immédiat	meaningless148	meanigless	meanigless	New	meaningless	0	r	s	r	700	894	700	Image0214		New	0	1	4			r	8	8	ML_new
P05	0 immédiat	meaningless095	meanigless	meanigless	New	meaningless	0	r	s	r	348	313	348	Image0235		New	0	1	4			r	8	8	ML_new
P05	0 immédiat	meaningless124	meanigless	meanigless	New	meaningless	0	r	s	r	932	882	932	Image0239		New	0	1	4			r	8	8	ML_new
P05	0 immédiat	meaningless130	meanigless	meanigless	New	meaningless	0	r	s	r	476	464	476	Image0240		New	0	1	4			r	8	8	ML_new
P05	0 immédiat	meaningless149	meanigless	meanigless	New	meaningless	0	r	s	r	604	522	604	Image0340		New	0	1	4			r	8	8	ML_new
P05	0 immédiat	meaningless087	meanigless	meanigless	New	meaningless	0	r	s	r	460	392	460	Image0381		New	0	1	4			r	8	8	ML_new
P05	0 immédiat	meaningless096	meanigless	meanigless	New	meaningless	0	r	s	r	780	788	780	Image0386		New	0	1	4			r	8	8	ML_new
P05	0 immédiat	meaningless113	meanigless	meanigless	New	meaningless	0	r	s	r	524	406	524	Image0402		New	0	1	4			r	8	8	ML_new
P05	0 immédiat	meaningless131	meanigless	meanigless	New	meaningless	0	r	s	r	412	432	412	Image0403		New	0	1	4			r	8	8	ML_new
P05	0 immédiat	meaningless097	meanigless	meanigless	New	meaningless	0	r	s	r	452	407	452	Image0456		New	0	1	4			r	8	8	ML_new
P05	0 immédiat	meaningless114	meanigless	meanigless	New	meaningless	0	r	s	r	516	363	516	Image0457		New	0	1	4			r	8	8	ML_new
P05	0 immédiat	meaningless132	meanigless	meanigless	New	meaningless	0	r	s	r	436	363	436	Image0458		New	0	1	4			r	8	8	ML_new
P05	0 immédiat	meaningless150	meanigless	meanigless	New	meaningless	0	r	s	r	540	383	540	Image0476		New	0	1	4			r	8	8	ML_new
P05	0 immédiat	meaningless098	meanigless	meanigless	New	meaningless	0	r	s	r	579	587	579	Image0486		New	0	1	4			r	8	8	ML_new
P05	0 immédiat	meaningless115	meanigless	meanigless	New	meaningless	0	r	s	r	452	341	452	Image0487		New	0	1	4			r	8	8	ML_new
P05	0 immédiat	meaningless133	meanigless	meanigless	New	meaningless	0	r	s	r	484	582	484	Image0488		New	0	1	4			r	8	8	ML_new
P05	0 immédiat	meaningless151	meanigless	meanigless	New	meaningless	0	r	s	r	500	692	500	Image0609		New	0	1	4			r	8	8	ML_new
P05	0 immédiat	meaningless099	meanigless	meanigless	New	meaningless	0	r	s	r	555	440	555	Image0617		New	0	1	4			r	8	8	ML_new
P05	0 immédiat	meaningless116	meanigless	meanigless	New	meaningless	0	r	s	r	540	541	540	Image0618		New	0	1	4			r	8	8	ML_new
P05	0 immédiat	meaningless134	meanigless	meanigless	New	meaningless	0	r	s	r	548	349	548	Image0619		New	0	1	4			r	8	8	ML_new
P05	0 immédiat	meaningless088	meanigless	meanigless	New	meaningless	0	r	s	r	428	308	428	Image0630		New	0	1	4			r	8	8	ML_new
P05	0 immédiat	meaningless152	meanigless	meanigless	New	meaningless	0	r	s	r	452	413	452	Image0635		New	0	1	4			r	8	8	ML_new
P05	0 immédiat	meaningless081	meanigless	meanigless	New	meaningless	0	r	s	r	540	464	540	Image0643		New	0	1	4			r	8	8	ML_new
P05	0 immédiat	meaningless100	meanigless	meanigless	New	meaningless	0	e	s	e	612	546	612	Image0644		New	0	1	3			e	7	7	ML_new
P05	0 immédiat	meaningless117	meanigless	meanigless	New	meaningless	0	r	s	r	451	332	451	Image0645		New	0	1	4			r	8	8	ML_new
P05	0 immédiat	meaningless135	meanigless	meanigless	New	meaningless	0	r	s	r	468	385	468	Image0646		New	0	1	4			r	8	8	ML_new
P05	0 immédiat	meaningless153	meanigless	meanigless	New	meaningless	0	r	s	r	348	400	348	Image0664		New	0	1	4			r	8	8	ML_new
P05	0 immédiat	meaningless082	meanigless	meanigless	New	meaningless	0	r	s	r	428	449	428	Image0671		New	0	1	4			r	8	8	ML_new
P05	0 immédiat	meaningless101	meanigless	meanigless	New	meaningless	0	r	s	r	580	608	580	Image0672		New	0	1	4			r	8	8	ML_new
P05	0 immédiat	meaningless118	meanigless	meanigless	New	meaningless	0	r	s	r	444	348	444	Image0673		New	0	1	4			r	8	8	ML_new
P05	0 immédiat	meaningless136	meanigless	meanigless	New	meaningless	0	r	s	r	556	531	556	Image0674		New	0	1	4			r	8	8	ML_new
P05	0 immédiat	meaningless154	meanigless	meanigless	New	meaningless	0	r	s	r	412	348	412	Image0691		New	0	1	4			r	8	8	ML_new
P05	0 immédiat	meaningless083	meanigless	meanigless	New	meaningless	0	r	s	r	444	488	444	Image0698		New	0	1	4			r	8	8	ML_new
P05	0 immédiat	meaningless102	meanigless	meanigless	New	meaningless	0	r	s	r	596	454	596	Image0701		New	0	1	4			r	8	8	ML_new
P05	0 immédiat	meaningless119	meanigless	meanigless	New	meaningless	0	r	s	r	373	392	373	Image0702		New	0	1	4			r	8	8	ML_new
P05	0 immédiat	meaningless137	meanigless	meanigless	New	meaningless	0	r	s	r	499	320	499	Image0704		New	0	1	4			r	8	8	ML_new
P05	0 immédiat	meaningless155	meanigless	meanigless	New	meaningless	0	r	s	r	396	318	396	Image0896		New	0	1	4			r	8	8	ML_new
P05	0 immédiat	meaningless084	meanigless	meanigless	New	meaningless	0	r	s	r	1043	913	1043	Image0932		New	0	1	4			r	8	8	ML_new
P05	0 immédiat	meaningless103	meanigless	meanigless	New	meaningless	0	r	s	r	636	306	636	Image0933		New	0	1	4			r	8	8	ML_new
P05	0 immédiat	meaningless120	meanigless	meanigless	New	meaningless	0	r	s	r	507	535	507	Image1001		New	0	1	4			r	8	8	ML_new
P05	0 immédiat	meaningless138	meanigless	meanigless	New	meaningless	0	r	s	r	428	372	428	Image1101		New	0	1	4			r	8	8	ML_new
P05	0 immédiat	meaningless156	meanigless	meanigless	New	meaningless	0	r	s	r	636	488	636	Image1207		New	0	1	4			r	8	8	ML_new
P05	0 immédiat	meaningless085	meanigless	meanigless	New	meaningless	0	r	s	r	420	594	420	Image1215		New	0	1	4			r	8	8	ML_new
P05	0 immédiat	meaningless106	meanigless	meanigless	New	meaningless	0	r	s	r	620	421	620	Image1216		New	0	1	4			r	8	8	ML_new
P05	0 immédiat	meaningless121	meanigless	meanigless	New	meaningless	0	r	s	r	564	356	564	Image1217		New	0	1	4			r	8	8	ML_new
P05	0 immédiat	meaningless139	meanigless	meanigless	New	meaningless	0	r	s	r	315	533	315	Image1218		New	0	1	4			r	8	8	ML_new
P05	0 immédiat	meaningless142	meanigless	meanigless	New	meaningless	0	r	s	r	652	586	652	Image1232		New	0	1	4			r	8	8	ML_new
P05	0 immédiat	meaningless157	meanigless	meanigless	New	meaningless	0	r	s	r	748	602	748	Image1234		New	0	1	4			r	8	8	ML_new
P05	0 immédiat	meaningless086	meanigless	meanigless	New	meaningless	0	r	s	r	540	334	540	Image1245		New	0	1	4			r	8	8	ML_new
P05	0 immédiat	meaningless104	meanigless	meanigless	New	meaningless	0	r	s	r	476	446	476	Image1246		New	0	1	4			r	8	8	ML_new
P05	0 immédiat	meaningless122	meanigless	meanigless	New	meaningless	0	r	s	r	435	470	435	Image1247		New	0	1	4			r	8	8	ML_new
P05	0 immédiat	meaningless140	meanigless	meanigless	New	meaningless	0	r	s	r	691	538	691	Image1250		New	0	1	4			r	8	8	ML_new
P05	0 immédiat	meaningless158	meanigless	meanigless	New	meaningless	0	r	s	r	324	326	324	Image1273		New	0	1	4			r	8	8	ML_new
P05	0 immédiat	meaningless089	meanigless	meanigless	New	meaningless	0	r	s	r	556	391	556	R17		New	0	1	4			r	8	8	ML_new
P05	0 immédiat	meaningless107	meanigless	meanigless	New	meaningless	0	r	s	r	516	453	516	R18		New	0	1	4			r	8	8	ML_new
P05	0 immédiat	meaningless125	meanigless	meanigless	New	meaningless	0	r	s	r	516	601	516	R19		New	0	1	4			r	8	8	ML_new
P05	0 immédiat	meaningless143	meanigless	meanigless	New	meaningless	0	r	s	r	572	450	572	R20		New	0	1	4			r	8	8	ML_new
P05	0 immédiat	meaningless090	meanigless	meanigless	New	meaningless	0	r	s	r	443	539	443	R5		New	0	1	4			r	8	8	ML_new
P05	0 immédiat	meaningless108	meanigless	meanigless	New	meaningless	0	r	s	r	491	337	491	R6		New	0	1	4			r	8	8	ML_new
P05	0 immédiat	meaningless126	meanigless	meanigless	New	meaningless	0	r	s	r	716	373	716	R7		New	0	1	4			r	8	8	ML_new
P05	0 immédiat	meaningless144	meanigless	meanigless	New	meaningless	0	r	s	r	395	506	395	R8		New	0	1	4			r	8	8	ML_new
P05	0 immédiat	meaningless192	meanigless	meanigless	Old	meaningless	1	e	l	e	492	2756	492	Image0090	120	Old	1	0	3	e	2			2	ML_old_120_1
P05	0 immédiat	meaningless224	meanigless	meanigless	Old	meaningless	1	e	l	e	484	1085	484	Image0091	120	Old	1	0	3	e	2			2	ML_old_120_1
P05	0 immédiat	meaningless180	meanigless	meanigless	Old	meaningless	1	r	s	r	412	316	412	Image0215	120	Old	0	1	4			r	8	8	ML_old_120_1
P05	0 immédiat	meaningless212	meanigless	meanigless	Old	meaningless	1	r	s	r	660	461	660	Image0220	120	Old	0	1	4			r	8	8	ML_old_120_1
P05	0 immédiat	meaningless164	meanigless	meanigless	Old	meaningless	1	r	l	r	428	888	428	Image0411	120	Old	1	0	4	r	1			1	ML_old_120_1
P05	0 immédiat	meaningless228	meanigless	meanigless	Old	meaningless	1	r	s	r	484	317	484	Image0413	120	Old	0	1	4			r	8	8	ML_old_120_1
P05	0 immédiat	meaningless196	meanigless	meanigless	Old	meaningless	1	r	l	r	444	2773	444	Image0462	120	Old	1	0	4	r	1			1	ML_old_120_1
P05	0 immédiat	meaningless184	meanigless	meanigless	Old	meaningless	1	r	l	r	460	380	460	Image0636	120	Old	1	0	4	r	1			1	ML_old_120_1
P05	0 immédiat	meaningless216	meanigless	meanigless	Old	meaningless	1	r	s	r	460	434	460	Image0637	120	Old	0	1	4			r	8	8	ML_old_120_1
P05	0 immédiat	meaningless168	meanigless	meanigless	Old	meaningless	1	e	s	e	1164	668	1164	Image0649	120	Old	0	1	3			e	7	7	ML_old_120_1
P05	0 immédiat	meaningless232	meanigless	meanigless	Old	meaningless	1	r	s	r	428	308	428	Image0652	120	Old	0	1	4			r	8	8	ML_old_120_1
P05	0 immédiat	meaningless200	meanigless	meanigless	Old	meaningless	1	r	l	r	516	491	516	Image0677	120	Old	1	0	4	r	1			1	ML_old_120_1
P05	0 immédiat	meaningless188	meanigless	meanigless	Old	meaningless	1	r	s	r	524	663	524	Image1208	120	Old	0	1	4			r	8	8	ML_old_120_1
P05	0 immédiat	meaningless220	meanigless	meanigless	Old	meaningless	1	r	l	r	332	348	332	Image1209	120	Old	1	0	4	r	1			1	ML_old_120_1
P05	0 immédiat	meaningless172	meanigless	meanigless	Old	meaningless	1	r	s	r	380	459	380	Image1220	120	Old	0	1	4			r	8	8	ML_old_120_1
P05	0 immédiat	meaningless204	meanigless	meanigless	Old	meaningless	1	r	s	r	411	493	411	Image1253	120	Old	0	1	4			r	8	8	ML_old_120_1
P05	0 immédiat	meaningless236	meanigless	meanigless	Old	meaningless	1	r	s	r	508	339	508	Image1254	120	Old	0	1	4			r	8	8	ML_old_120_1
P05	0 immédiat	meaningless176	meanigless	meanigless	Old	meaningless	1	e	l	e	732	523	732	R22	120	Old	1	0	3	e	2			2	ML_old_120_1
P05	0 immédiat	meaningless208	meanigless	meanigless	Old	meaningless	1	r	s	r	436	318	436	R23	120	Old	0	1	4			r	8	8	ML_old_120_1
P05	0 immédiat	meaningless240	meanigless	meanigless	Old	meaningless	1	r	s	r	1052	442	1052	R24	120	Old	0	1	4			r	8	8	ML_old_120_1
P05	0 immédiat	meaningless178	meanigless	meanigless	Old	meaningless	2	e	s	e	484	1607	484	Image0107	120	Old	0	1	3			e	7	7	ML_old_120_2
P05	0 immédiat	meaningless210	meanigless	meanigless	Old	meaningless	2	r	s	r	460	260	460	Image0108	120	Old	0	1	4			r	8	8	ML_old_120_2
P05	0 immédiat	meaningless162	meanigless	meanigless	Old	meaningless	2	r	l	r	444	524	444	Image0176	120	Old	1	0	4	r	1			1	ML_old_120_2
P05	0 immédiat	meaningless226	meanigless	meanigless	Old	meaningless	2	r	s	r	476	551	476	Image0179	120	Old	0	1	4			r	8	8	ML_old_120_2
P05	0 immédiat	meaningless194	meanigless	meanigless	Old	meaningless	2	z	s	z	2052	3577	2052	Image0243	120	Old	0	1	2			z	6	6	ML_old_120_2
P05	0 immédiat	meaningless182	meanigless	meanigless	Old	meaningless	2	r	l	r	500	319	500	Image0426	120	Old	1	0	4	r	1			1	ML_old_120_2
P05	0 immédiat	meaningless206	meanigless	meanigless	Old	meaningless	2	r	l	r	372	378	372	Image0477	120	Old	1	0	4	r	1			1	ML_old_120_2
P05	0 immédiat	meaningless214	meanigless	meanigless	Old	meaningless	2	r	l	r	380	401	380	Image0478	120	Old	1	0	4	r	1			1	ML_old_120_2
P05	0 immédiat	meaningless166	meanigless	meanigless	Old	meaningless	2	r	s	r	500	446	500	Image0494	120	Old	0	1	4			r	8	8	ML_old_120_2
P05	0 immédiat	meaningless230	meanigless	meanigless	Old	meaningless	2	r	s	r	420	397	420	Image0542	120	Old	0	1	4			r	8	8	ML_old_120_2
P05	0 immédiat	meaningless198	meanigless	meanigless	Old	meaningless	2	e	l	e	548	411	548	Image0622	120	Old	1	0	3	e	2			2	ML_old_120_2
P05	0 immédiat	meaningless238	meanigless	meanigless	Old	meaningless	2	e	l	e	436	537	436	Image0680	120	Old	1	0	3	e	2			2	ML_old_120_2
P05	0 immédiat	meaningless186	meanigless	meanigless	Old	meaningless	2	r	l	r	436	448	436	Image0692	120	Old	1	0	4	r	1			1	ML_old_120_2
P05	0 immédiat	meaningless218	meanigless	meanigless	Old	meaningless	2	r	l	r	332	367	332	Image0693	120	Old	1	0	4	r	1			1	ML_old_120_2
P05	0 immédiat	meaningless170	meanigless	meanigless	Old	meaningless	2	r	l	r	420	487	420	Image0760	120	Old	1	0	4	r	1			1	ML_old_120_2
P05	0 immédiat	meaningless202	meanigless	meanigless	Old	meaningless	2	r	l	r	468	332	468	Image1104	120	Old	1	0	4	r	1			1	ML_old_120_2
P05	0 immédiat	meaningless234	meanigless	meanigless	Old	meaningless	2	r	l	r	308	318	308	Image1105	120	Old	1	0	4	r	1			1	ML_old_120_2
P05	0 immédiat	meaningless174	meanigless	meanigless	Old	meaningless	2	r	l	r	404	506	404	Image1252	120	Old	1	0	4	r	1			1	ML_old_120_2
P05	0 immédiat	meaningless190	meanigless	meanigless	Old	meaningless	2	r	l	r	323	502	323	Image1274	120	Old	1	0	4	r	1			1	ML_old_120_2
P05	0 immédiat	meaningless222	meanigless	meanigless	Old	meaningless	2	e	l	e	460	2251	460	Image1277	120	Old	1	0	3	e	2			2	ML_old_120_2
P05	0 immédiat	meaningless191	meanigless	meanigless	Old	meaningless	1	e	s	e	2876	1145	2876	Image0017	1920	Old	0	1	3			e	7	7	ML_old_1920_1
P05	0 immédiat	meaningless223	meanigless	meanigless	Old	meaningless	1	e	s	e	940	2387	940	Image0018	1920	Old	0	1	3			e	7	7	ML_old_1920_1
P05	0 immédiat	meaningless179	meanigless	meanigless	Old	meaningless	1	r	l	r	428	516	428	Image0157	1920	Old	1	0	4	r	1			1	ML_old_1920_1
P05	0 immédiat	meaningless211	meanigless	meanigless	Old	meaningless	1	r	s	r	404	383	404	Image0162	1920	Old	0	1	4			r	8	8	ML_old_1920_1
P05	0 immédiat	meaningless163	meanigless	meanigless	Old	meaningless	1	e	l	e	988	549	988	Image0242	1920	Old	1	0	3	e	2			2	ML_old_1920_1
P05	0 immédiat	meaningless227	meanigless	meanigless	Old	meaningless	1	r	l	r	356	442	356	Image0246	1920	Old	1	0	4	r	1			1	ML_old_1920_1
P05	0 immédiat	meaningless195	meanigless	meanigless	Old	meaningless	1	r	l	r	308	400	308	Image0412	1920	Old	1	0	4	r	1			1	ML_old_1920_1
P05	0 immédiat	meaningless183	meanigless	meanigless	Old	meaningless	1	r	l	r	500	724	500	Image0610	1920	Old	1	0	4	r	1			1	ML_old_1920_1
P05	0 immédiat	meaningless215	meanigless	meanigless	Old	meaningless	1	r	l	r	1596	3272	1596	Image0611	1920	Old	1	0	4	r	1			1	ML_old_1920_1
P05	0 immédiat	meaningless167	meanigless	meanigless	Old	meaningless	1	r	s	r	572	501	572	Image0621	1920	Old	0	1	4			r	8	8	ML_old_1920_1
P05	0 immédiat	meaningless231	meanigless	meanigless	Old	meaningless	1	r	l	r	612	705	612	Image0623	1920	Old	1	0	4	r	1			1	ML_old_1920_1
P05	0 immédiat	meaningless199	meanigless	meanigless	Old	meaningless	1	r	s	r	627	407	627	Image0651	1920	Old	0	1	4			r	8	8	ML_old_1920_1
P05	0 immédiat	meaningless187	meanigless	meanigless	Old	meaningless	1	r	l	r	972	1095	972	Image0897	1920	Old	1	0	4	r	1			1	ML_old_1920_1
P05	0 immédiat	meaningless219	meanigless	meanigless	Old	meaningless	1	r	l	r	660	961	660	Image0916	1920	Old	1	0	4	r	1			1	ML_old_1920_1
P05	0 immédiat	meaningless171	meanigless	meanigless	Old	meaningless	1	r	l	r	468	407	468	Image1103	1920	Old	1	0	4	r	1			1	ML_old_1920_1
P05	0 immédiat	meaningless203	meanigless	meanigless	Old	meaningless	1	r	l	r	596	557	596	Image1221	1920	Old	1	0	4	r	1			1	ML_old_1920_1
P05	0 immédiat	meaningless235	meanigless	meanigless	Old	meaningless	1	r	l	r	443	429	443	Image1222	1920	Old	1	0	4	r	1			1	ML_old_1920_1
P05	0 immédiat	meaningless175	meanigless	meanigless	Old	meaningless	1	z	l	z	404	12203	404	R10	1920	Old	1	0	2	z	3			3	ML_old_1920_1
P05	0 immédiat	meaningless207	meanigless	meanigless	Old	meaningless	1	r	l	r	252	562	252	R11	1920	Old	1	0	4	r	1			1	ML_old_1920_1
P05	0 immédiat	meaningless239	meanigless	meanigless	Old	meaningless	1	r	l	r	444	376	444	R12	1920	Old	1	0	4	r	1			1	ML_old_1920_1
P05	0 immédiat	meaningless177	meanigless	meanigless	Old	meaningless	2	r	l	r	476	341	476	Image0070	1920	Old	1	0	4	r	1			1	ML_old_1920_2
P05	0 immédiat	meaningless209	meanigless	meanigless	Old	meaningless	2	r	l	r	388	303	388	Image0071	1920	Old	1	0	4	r	1			1	ML_old_1920_2
P05	0 immédiat	meaningless161	meanigless	meanigless	Old	meaningless	2	r	l	r	388	515	388	Image0128	1920	Old	1	0	4	r	1			1	ML_old_1920_2
P05	0 immédiat	meaningless205	meanigless	meanigless	Old	meaningless	2	r	l	r	316	428	316	Image0129	1920	Old	1	0	4	r	1			1	ML_old_1920_2
P05	0 immédiat	meaningless225	meanigless	meanigless	Old	meaningless	2	r	l	r	404	463	404	Image0132	1920	Old	1	0	4	r	1			1	ML_old_1920_2
P05	0 immédiat	meaningless193	meanigless	meanigless	Old	meaningless	2	r	l	r	388	635	388	Image0178	1920	Old	1	0	4	r	1			1	ML_old_1920_2
P05	0 immédiat	meaningless181	meanigless	meanigless	Old	meaningless	2	r	s	r	548	328	548	Image0344	1920	Old	0	1	4			r	8	8	ML_old_1920_2
P05	0 immédiat	meaningless213	meanigless	meanigless	Old	meaningless	2	r	l	r	412	291	412	Image0348	1920	Old	1	0	4	r	1			1	ML_old_1920_2
P05	0 immédiat	meaningless173	meanigless	meanigless	Old	meaningless	2	r	l	r	324	332	324	Image0425	1920	Old	1	0	4	r	1			1	ML_old_1920_2
P05	0 immédiat	meaningless237	meanigless	meanigless	Old	meaningless	2	r	l	r	268	326	268	Image0427	1920	Old	1	0	4	r	1			1	ML_old_1920_2
P05	0 immédiat	meaningless165	meanigless	meanigless	Old	meaningless	2	r	l	r	533	364	533	Image0461	1920	Old	1	0	4	r	1			1	ML_old_1920_2
P05	0 immédiat	meaningless229	meanigless	meanigless	Old	meaningless	2	r	l	r	572	541	572	Image0465	1920	Old	1	0	4	r	1			1	ML_old_1920_2
P05	0 immédiat	meaningless197	meanigless	meanigless	Old	meaningless	2	r	l	r	468	395	468	Image0501	1920	Old	1	0	4	r	1			1	ML_old_1920_2
P05	0 immédiat	meaningless185	meanigless	meanigless	Old	meaningless	2	r	l	r	436	457	436	Image0665	1920	Old	1	0	4	r	1			1	ML_old_1920_2
P05	0 immédiat	meaningless217	meanigless	meanigless	Old	meaningless	2	r	l	r	387	449	387	Image0666	1920	Old	1	0	4	r	1			1	ML_old_1920_2
P05	0 immédiat	meaningless169	meanigless	meanigless	Old	meaningless	2	r	l	r	268	1315	268	Image0676	1920	Old	1	0	4	r	1			1	ML_old_1920_2
P05	0 immédiat	meaningless201	meanigless	meanigless	Old	meaningless	2	r	l	r	364	367	364	Image0764	1920	Old	1	0	4	r	1			1	ML_old_1920_2
P05	0 immédiat	meaningless233	meanigless	meanigless	Old	meaningless	2	r	l	r	452	452	452	Image0785	1920	Old	1	0	4	r	1			1	ML_old_1920_2
P05	0 immédiat	meaningless189	meanigless	meanigless	Old	meaningless	2	r	l	r	324	271	324	Image1235	1920	Old	1	0	4	r	1			1	ML_old_1920_2
P05	0 immédiat	meaningless221	meanigless	meanigless	Old	meaningless	2	r	l	r	427	383	427	Image1236	1920	Old	1	0	4	r	1			1	ML_old_1920_2
P06	0 immédiat	animal13	chenille	animal	Old	meaningfull	1	r	l	r	140	284	140	gist013_2	120	Old	1	0	4	r	1			1	MF_old_120_1
P06	0 immédiat	animal22	elephant	animal	Old	meaningfull	1	e	s	e	140	307	140	gist022_2	120	Old	0	1	3			e	7	7	MF_old_120_1
P06	0 immédiat	animal33	panthÃ¨re	animal	Old	meaningfull	1	e	s	e	92	847	92	gist033_1	120	Old	0	1	3			e	7	7	MF_old_120_1
P06	0 immédiat	animal41	oxyx	animal	Old	meaningfull	1	e	s	e	67	526	67	gist041_2	120	Old	0	1	3			e	7	7	MF_old_120_1
P06	0 immédiat	animal48	ecureuil	animal	Old	meaningfull	1	r	l	r	204	404	204	gist048_1	120	Old	1	0	4	r	1			1	MF_old_120_1
P06	0 immédiat	animal56	gorille	animal	Old	meaningfull	1	r	s	r	228	977	228	gist056_1	120	Old	0	1	4			r	8	8	MF_old_120_1
P06	0 immédiat	animal77	flaman rose	animal	Old	meaningfull	1	e	s	e	1244	457	1244	gist077_1	120	Old	0	1	3			e	7	7	MF_old_120_1
P06	0 immédiat	paysage4	rocher	paysage	Old	meaningfull	1	e	s	e	108	855	108	gist104_2	120	Old	0	1	3			e	7	7	MF_old_120_1
P06	0 immédiat	paysage16	champ de fleur	paysage	Old	meaningfull	1	r	s	r	92	287	92	gist116_1	120	Old	0	1	4			r	8	8	MF_old_120_1
P06	0 immédiat	paysage25	route	paysage	Old	meaningfull	1	z	l	z	428	513	428	gist125_10	120	Old	1	0	2	z	3			3	MF_old_120_1
P06	0 immédiat	objet isole3	brosse Ã dent	objet isole	Old	meaningfull	1	z	l	z	1084	407	1084	gist153_1	120	Old	1	0	2	z	3			3	MF_old_120_1
P06	0 immédiat	objet isole11	toune_visse	objet isole	Old	meaningfull	1	z	s	z	268	635	268	gist160_1	120	Old	0	1	2			z	6	6	MF_old_120_1
P06	0 immédiat	objet isole22	raquette	objet isole	Old	meaningfull	1	r	l	r	132	331	132	gist171_1	120	Old	1	0	4	r	1			1	MF_old_120_1
P06	0 immédiat	objet isole28	cle	objet isole	Old	meaningfull	1	a	s	a	228	579	228	gist177_1	120	Old	0	1	1			a	5	5	MF_old_120_1
P06	0 immédiat	fuit/legumes isoles5	raisin	fruits/legumes	Old	meaningfull	1	e	l	e	268	363	268	gist405_1	120	Old	1	0	3	e	2			2	MF_old_120_1
P06	0 immédiat	fuit/legumes isoles28	cookies	fruits/legumes	Old	meaningfull	1	r	l	r	228	346	228	gist428_2	120	Old	1	0	4	r	1			1	MF_old_120_1
P06	0 immédiat	fuit/legumes isoles34	mur	fruits/legumes	Old	meaningfull	1	r	l	r	188	333	188	gist434_2	120	Old	1	0	4	r	1			1	MF_old_120_1
P06	0 immédiat	fuit/legumes isoles43	cafe	fruits/legumes	Old	meaningfull	1	r	l	r	1028	531	1028	gist443_2	120	Old	1	0	4	r	1			1	MF_old_120_1
P06	0 immédiat	fuit/legumes isoles52	datte	fruits/legumes	Old	meaningfull	1	e	s	e	1325	523	1325	gist452_3	120	Old	0	1	3			e	7	7	MF_old_120_1
P06	0 immédiat	fuit/legumes isoles60	carotte	fruits/legumes	Old	meaningfull	1	r	l	r	164	294	164	gist462_1	120	Old	1	0	4	r	1			1	MF_old_120_1
P06	0 immédiat	animal6	grenouille	animal	Old	meaningfull	2	e	l	e	557	618	557	gist006_1	120	Old	1	0	3	e	2			2	MF_old_120_2
P06	0 immédiat	animal18	ours polaire	animal	Old	meaningfull	2	r	l	r	148	405	148	gist018_2	120	Old	1	0	4	r	1			1	MF_old_120_2
P06	0 immédiat	animal30	chien	animal	Old	meaningfull	2	z	s	z	524	2525	524	gist030_1	120	Old	0	1	2			z	6	6	MF_old_120_2
P06	0 immédiat	animal38	zebre	animal	Old	meaningfull	2	r	s	r	68	276	68	gist038_1	120	Old	0	1	4			r	8	8	MF_old_120_2
P06	0 immédiat	animal44	vache	animal	Old	meaningfull	2	r	l	r	172	337	172	gist044_2	120	Old	1	0	4	r	1			1	MF_old_120_2
P06	0 immédiat	animal53	bison	animal	Old	meaningfull	2	z	l	z	324	377	324	gist053_1	120	Old	1	0	2	z	3			3	MF_old_120_2
P06	0 immédiat	animal62	ane	animal	Old	meaningfull	2	z	l	z	436	442	436	gist062_1	120	Old	1	0	2	z	3			3	MF_old_120_2
P06	0 immédiat	animal80	coq	animal	Old	meaningfull	2	r	l	r	275	426	275	gist080_1	120	Old	1	0	4	r	1			1	MF_old_120_2
P06	0 immédiat	paysage11	montagne	paysage	Old	meaningfull	2	z	s	z	636	3371	636	gist111_1	120	Old	0	1	2			z	6	6	MF_old_120_2
P06	0 immédiat	paysage20	champ	paysage	Old	meaningfull	2	r	l	r	236	348	236	gist120_1	120	Old	1	0	4	r	1			1	MF_old_120_2
P06	0 immédiat	paysage25	route	paysage	Old	meaningfull	2	e	l	e	292	314	292	gist125_4	120	Old	1	0	3	e	2			2	MF_old_120_2
P06	0 immédiat	objet isole5	eponde	objet isole	Old	meaningfull	2	r	l	r	204	451	204	gist155_1	120	Old	1	0	4	r	1			1	MF_old_120_2
P06	0 immédiat	objet isole14	pince Ã linge	objet isole	Old	meaningfull	2	r	l	r	116	389	116	gist163_1	120	Old	1	0	4	r	1			1	MF_old_120_2
P06	0 immédiat	objet isole24	pince	objet isole	Old	meaningfull	2	e	s	e	148	366	148	gist173_1	120	Old	0	1	3			e	7	7	MF_old_120_2
P06	0 immédiat	fuit/legumes isoles1	pomme	fruits/legumes	Old	meaningfull	2	z	s	z	108	382	108	gist401_1	120	Old	0	1	2			z	6	6	MF_old_120_2
P06	0 immédiat	fuit/legumes isoles18	champignion	fruits/legumes	Old	meaningfull	2	r	l	r	196	421	196	gist418_2	120	Old	1	0	4	r	1			1	MF_old_120_2
P06	0 immédiat	fuit/legumes isoles32	cacahouette	fruits/legumes	Old	meaningfull	2	r	l	r	276	290	276	gist432_2	120	Old	1	0	4	r	1			1	MF_old_120_2
P06	0 immédiat	fuit/legumes isoles39	poulet	fruits/legumes	Old	meaningfull	2	r	l	r	244	348	244	gist439_2	120	Old	1	0	4	r	1			1	MF_old_120_2
P06	0 immédiat	fuit/legumes isoles47	avocat	fruits/legumes	Old	meaningfull	2	e	l	e	196	374	196	gist448_1	120	Old	1	0	3	e	2			2	MF_old_120_2
P06	0 immédiat	fuit/legumes isoles58	croissant	fruits/legumes	Old	meaningfull	2	r	l	r	68	318	68	gist460_1	120	Old	1	0	4	r	1			1	MF_old_120_2
P06	0 immédiat	animal8	tortue	animal	Old	meaningfull	1	r	l	r	124	342	124	gist008_1	1920	Old	1	0	4	r	1			1	MF_old_1920_1
P06	0 immédiat	animal21	rinoceroce	animal	Old	meaningfull	1	r	l	r	196	361	196	gist021_1	1920	Old	1	0	4	r	1			1	MF_old_1920_1
P06	0 immédiat	animal31	loup	animal	Old	meaningfull	1	z	s	z	204	2406	204	gist031_1	1920	Old	0	1	2			z	6	6	MF_old_1920_1
P06	0 immédiat	animal40	cerf	animal	Old	meaningfull	1	e	l	e	268	338	268	gist040_2	1920	Old	1	0	3	e	2			2	MF_old_1920_1
P06	0 immédiat	animal45	kangourou	animal	Old	meaningfull	1	r	l	r	164	329	164	gist045_1	1920	Old	1	0	4	r	1			1	MF_old_1920_1
P06	0 immédiat	animal54	mouton	animal	Old	meaningfull	1	r	l	r	428	435	428	gist054_1	1920	Old	1	0	4	r	1			1	MF_old_1920_1
P06	0 immédiat	animal67	pinguin	animal	Old	meaningfull	1	r	l	r	500	518	500	gist067_1	1920	Old	1	0	4	r	1			1	MF_old_1920_1
P06	0 immédiat	paysage2	plage	paysage	Old	meaningfull	1	r	l	r	180	438	180	gist102_1	1920	Old	1	0	4	r	1			1	MF_old_1920_1
P06	0 immédiat	paysage13	desert:steppe	paysage	Old	meaningfull	1	r	l	r	204	317	204	gist113_2	1920	Old	1	0	4	r	1			1	MF_old_1920_1
P06	0 immédiat	paysage25	route	paysage	Old	meaningfull	1	r	l	r	116	384	116	gist125_1	1920	Old	1	0	4	r	1			1	MF_old_1920_1
P06	0 immédiat	paysage25	route	paysage	Old	meaningfull	1	z	l	z	348	596	348	gist125_8	1920	Old	1	0	2	z	3			3	MF_old_1920_1
P06	0 immédiat	objet isole8	epingles nourisse	objet isole	Old	meaningfull	1	r	l	r	324	440	324	gist157_2	1920	Old	1	0	4	r	1			1	MF_old_1920_1
P06	0 immédiat	objet isole16	couverts	objet isole	Old	meaningfull	1	r	l	r	276	585	276	gist165_1	1920	Old	1	0	4	r	1			1	MF_old_1920_1
P06	0 immédiat	objet isole26	scie	objet isole	Old	meaningfull	1	r	l	r	172	307	172	gist175_1	1920	Old	1	0	4	r	1			1	MF_old_1920_1
P06	0 immédiat	fuit/legumes isoles3	orange	fruits/legumes	Old	meaningfull	1	r	l	r	172	348	172	gist403_2	1920	Old	1	0	4	r	1			1	MF_old_1920_1
P06	0 immédiat	fuit/legumes isoles19	tomate	fruits/legumes	Old	meaningfull	1	r	l	r	156	844	156	gist419_1	1920	Old	1	0	4	r	1			1	MF_old_1920_1
P06	0 immédiat	fuit/legumes isoles33	myrtille	fruits/legumes	Old	meaningfull	1	r	l	r	164	290	164	gist433_2	1920	Old	1	0	4	r	1			1	MF_old_1920_1
P06	0 immédiat	fuit/legumes isoles40	jambon	fruits/legumes	Old	meaningfull	1	r	l	r	228	391	228	gist440_2	1920	Old	1	0	4	r	1			1	MF_old_1920_1
P06	0 immédiat	fuit/legumes isoles51	blette	fruits/legumes	Old	meaningfull	1	r	l	r	236	310	236	gist451_2	1920	Old	1	0	4	r	1			1	MF_old_1920_1
P06	0 immédiat	fuit/legumes isoles59	radis	fruits/legumes	Old	meaningfull	1	r	l	r	180	425	180	gist461_1	1920	Old	1	0	4	r	1			1	MF_old_1920_1
P06	0 immédiat	animal5	papillon	animal	Old	meaningfull	2	r	l	r	292	301	292	gist005_1	1920	Old	1	0	4	r	1			1	MF_old_1920_2
P06	0 immédiat	animal17	dauphin	animal	Old	meaningfull	2	r	l	r	556	509	556	gist017_2	1920	Old	1	0	4	r	1			1	MF_old_1920_2
P06	0 immédiat	animal26	ours	animal	Old	meaningfull	2	r	l	r	124	422	124	gist026_2	1920	Old	1	0	4	r	1			1	MF_old_1920_2
P06	0 immédiat	animal35	tigre	animal	Old	meaningfull	2	r	l	r	207	389	207	gist035_2	1920	Old	1	0	4	r	1			1	MF_old_1920_2
P06	0 immédiat	animal42	giraffe	animal	Old	meaningfull	2	r	l	r	236	405	236	gist042_3	1920	Old	1	0	4	r	1			1	MF_old_1920_2
P06	0 immédiat	animal52	bouc	animal	Old	meaningfull	2	e	l	e	196	311	196	gist052_2	1920	Old	1	0	3	e	2			2	MF_old_1920_2
P06	0 immédiat	animal60	panthÃ¨re noire	animal	Old	meaningfull	2	r	l	r	236	488	236	gist060_2	1920	Old	1	0	4	r	1			1	MF_old_1920_2
P06	0 immédiat	animal79	cigogne	animal	Old	meaningfull	2	r	l	r	300	494	300	gist079_1	1920	Old	1	0	4	r	1			1	MF_old_1920_2
P06	0 immédiat	paysage7	foret	paysage	Old	meaningfull	2	r	l	r	228	315	228	gist107_1	1920	Old	1	0	4	r	1			1	MF_old_1920_2
P06	0 immédiat	paysage19	champ	paysage	Old	meaningfull	2	r	l	r	180	494	180	gist119_1	1920	Old	1	0	4	r	1			1	MF_old_1920_2
P06	0 immédiat	paysage25	route	paysage	Old	meaningfull	2	r	l	r	124	352	124	gist125_2	1920	Old	1	0	4	r	1			1	MF_old_1920_2
P06	0 immédiat	objet isole4	peigne	objet isole	Old	meaningfull	2	r	l	r	236	402	236	gist154_1	1920	Old	1	0	4	r	1			1	MF_old_1920_2
P06	0 immédiat	objet isole13	ciseau	objet isole	Old	meaningfull	2	e	l	e	172	389	172	gist162_1	1920	Old	1	0	3	e	2			2	MF_old_1920_2
P06	0 immédiat	objet isole23	des	objet isole	Old	meaningfull	2	r	l	r	324	276	324	gist172_1	1920	Old	1	0	4	r	1			1	MF_old_1920_2
P06	0 immédiat	objet isole31	spatule	objet isole	Old	meaningfull	2	r	l	r	228	269	228	gist180_1	1920	Old	1	0	4	r	1			1	MF_old_1920_2
P06	0 immédiat	fuit/legumes isoles9	pasteque	fruits/legumes	Old	meaningfull	2	r	l	r	851	2850	851	gist409_1	1920	Old	1	0	4	r	1			1	MF_old_1920_2
P06	0 immédiat	fuit/legumes isoles30	choux	fruits/legumes	Old	meaningfull	2	r	l	r	196	328	196	gist430_2	1920	Old	1	0	4	r	1			1	MF_old_1920_2
P06	0 immédiat	fuit/legumes isoles36	paplemousse	fruits/legumes	Old	meaningfull	2	r	l	r	155	458	155	gist436_2	1920	Old	1	0	4	r	1			1	MF_old_1920_2
P06	0 immédiat	fuit/legumes isoles45	haricot	fruits/legumes	Old	meaningfull	2	r	l	r	220	294	220	gist446_2	1920	Old	1	0	4	r	1			1	MF_old_1920_2
P06	0 immédiat	fuit/legumes isoles56	poivron	fruits/legumes	Old	meaningfull	2	r	l	r	148	312	148	gist457_1	1920	Old	1	0	4	r	1			1	MF_old_1920_2
P06	0 immédiat	animal15	poisson	animal	New-oldGist	meaningfull	1	e	s	e	124	291	124	gist015_1	120	R-gist	0	1	3			e	7	7	MF_N_oldGist_120_1
P06	0 immédiat	animal47	chevre	animal	New-oldGist	meaningfull	1	r	s	r	100	489	100	gist047_1	120	R-gist	0	1	4			r	8	8	MF_N_oldGist_120_1
P06	0 immédiat	animal78	casoar	animal	New-oldGist	meaningfull	1	a	s	a	252	505	252	gist078_1	120	R-gist	0	1	1			a	5	5	MF_N_oldGist_120_1
P06	0 immédiat	paysage15	fond marin	paysage	New-oldGist	meaningfull	1	e	s	e	132	205	132	gist115_1	120	R-gist	0	1	3			e	7	7	MF_N_oldGist_120_1
P06	0 immédiat	paysage25	route	paysage	New-oldGist	meaningfull	1	r	s	r	140	288	140	gist125_5	120	R-gist	0	1	4			r	8	8	MF_N_oldGist_120_1
P06	0 immédiat	objet isole1	balle	objet isole	New-oldGist	meaningfull	1	r	s	r	76	321	76	gist151_1	120	R-gist	0	1	4			r	8	8	MF_N_oldGist_120_1
P06	0 immédiat	objet isole17	compa	objet isole	New-oldGist	meaningfull	1	r	s	r	163	377	163	gist166_1	120	R-gist	0	1	4			r	8	8	MF_N_oldGist_120_1
P06	0 immédiat	fuit/legumes isoles22	mais	fruits/legumes	New-oldGist	meaningfull	1	e	l	e	284	347	284	gist422_2	120	R-gist	1	0	3	e	2			2	MF_N_oldGist_120_1
P06	0 immédiat	fuit/legumes isoles38	brocoli	fruits/legumes	New-oldGist	meaningfull	1	z	l	z	484	441	484	gist438_2	120	R-gist	1	0	2	z	3			3	MF_N_oldGist_120_1
P06	0 immédiat	fuit/legumes isoles57	pizza	fruits/legumes	New-oldGist	meaningfull	1	r	s	r	172	314	172	gist459_1	120	R-gist	0	1	4			r	8	8	MF_N_oldGist_120_1
P06	0 immédiat	animal3	sauterelle	animal	New-oldGist	meaningfull	2	r	s	r	212	444	212	gist003_2	120	R-gist	0	1	4			r	8	8	MF_N_oldGist_120_2
P06	0 immédiat	animal39	cheval	animal	New-oldGist	meaningfull	2	r	s	r	404	513	404	gist039_3	120	R-gist	0	1	4			r	8	8	MF_N_oldGist_120_2
P06	0 immédiat	animal75	perroquet	animal	New-oldGist	meaningfull	2	e	s	e	228	346	228	gist075_1	120	R-gist	0	1	3			e	7	7	MF_N_oldGist_120_2
P06	0 immédiat	paysage8	grand canyon	paysage	New-oldGist	meaningfull	2	r	s	r	196	642	196	gist108_3	120	R-gist	0	1	4			r	8	8	MF_N_oldGist_120_2
P06	0 immédiat	paysage23	cascade	paysage	New-oldGist	meaningfull	2	r	s	r	140	358	140	gist123_1	120	R-gist	0	1	4			r	8	8	MF_N_oldGist_120_2
P06	0 immédiat	paysage28	farwest	paysage	New-oldGist	meaningfull	2	e	s	e	140	365	140	gist128_1	120	R-gist	0	1	3			e	7	7	MF_N_oldGist_120_2
P06	0 immédiat	objet isole10	marteau	objet isole	New-oldGist	meaningfull	2	a	l	a	164	1141	164	gist159_1	120	R-gist	1	0	1	a	4			4	MF_N_oldGist_120_2
P06	0 immédiat	fuit/legumes isoles4	banane	fruits/legumes	New-oldGist	meaningfull	2	r	s	r	860	915	860	gist404_1	120	R-gist	0	1	4			r	8	8	MF_N_oldGist_120_2
P06	0 immédiat	fuit/legumes isoles27	pain	fruits/legumes	New-oldGist	meaningfull	2	r	s	r	132	352	132	gist427_1	120	R-gist	0	1	4			r	8	8	MF_N_oldGist_120_2
P06	0 immédiat	fuit/legumes isoles46	Å“uf	fruits/legumes	New-oldGist	meaningfull	2	r	s	r	332	466	332	gist447_3	120	R-gist	0	1	4			r	8	8	MF_N_oldGist_120_2
P06	0 immédiat	animal4	champigon	animal	New-oldGist	meaningfull	1	r	s	r	740	552	740	gist004_2	1920	R-gist	0	1	4			r	8	8	MF_N_oldGist_1920_1
P06	0 immédiat	animal43	chameau	animal	New-oldGist	meaningfull	1	z	s	z	700	2467	700	gist043_1	1920	R-gist	0	1	2			z	6	6	MF_N_oldGist_1920_1
P06	0 immédiat	animal76	paon	animal	New-oldGist	meaningfull	1	r	s	r	76	301	76	gist076_1	1920	R-gist	0	1	4			r	8	8	MF_N_oldGist_1920_1
P06	0 immédiat	paysage9	montagne eneige	paysage	New-oldGist	meaningfull	1	e	s	e	252	318	252	gist109_1	1920	R-gist	0	1	3			e	7	7	MF_N_oldGist_1920_1
P06	0 immédiat	paysage25	route	paysage	New-oldGist	meaningfull	1	r	l	r	156	354	156	gist125_3	1920	R-gist	1	0	4	r	1			1	MF_N_oldGist_1920_1
P06	0 immédiat	paysage30	grotte	paysage	New-oldGist	meaningfull	1	r	s	r	132	395	132	gist130_1	1920	R-gist	0	1	4			r	8	8	MF_N_oldGist_1920_1
P06	0 immédiat	objet isole12	pinceau	objet isole	New-oldGist	meaningfull	1	r	s	r	228	506	228	gist161_1	1920	R-gist	0	1	4			r	8	8	MF_N_oldGist_1920_1
P06	0 immédiat	fuit/legumes isoles6	noix de coco	fruits/legumes	New-oldGist	meaningfull	1	z	l	z	460	712	460	gist406_2	1920	R-gist	1	0	2	z	3			3	MF_N_oldGist_1920_1
P06	0 immédiat	fuit/legumes isoles37	pÃªche	fruits/legumes	New-oldGist	meaningfull	1	e	s	e	1180	535	1180	gist437_1	1920	R-gist	0	1	3			e	7	7	MF_N_oldGist_1920_1
P06	0 immédiat	fuit/legumes isoles49	kaki	fruits/legumes	New-oldGist	meaningfull	1	r	s	r	180	461	180	gist449_1	1920	R-gist	0	1	4			r	8	8	MF_N_oldGist_1920_1
P06	0 immédiat	animal1	escargot	animal	New-oldGist	meaningfull	2	r	s	r	148	378	148	gist001_1	1920	R-gist	0	1	4			r	8	8	MF_N_oldGist_1920_2
P06	0 immédiat	animal16	phoque	animal	New-oldGist	meaningfull	2	z	s	z	172	533	172	gist016_1	1920	R-gist	0	1	2			z	6	6	MF_N_oldGist_1920_2
P06	0 immédiat	animal68	cygne	animal	New-oldGist	meaningfull	2	e	s	e	140	323	140	gist068_1	1920	R-gist	0	1	3			e	7	7	MF_N_oldGist_1920_2
P06	0 immédiat	paysage1	ciel	paysage	New-oldGist	meaningfull	2	z	s	z	187	347	187	gist101_1	1920	R-gist	0	1	2			z	6	6	MF_N_oldGist_1920_2
P06	0 immédiat	paysage17	banquise	paysage	New-oldGist	meaningfull	2	r	s	r	148	569	148	gist117_2	1920	R-gist	0	1	4			r	8	8	MF_N_oldGist_1920_2
P06	0 immédiat	paysage27	fougÃ¨re	paysage	New-oldGist	meaningfull	2	r	l	r	132	379	132	gist127_1	1920	R-gist	1	0	4	r	1			1	MF_N_oldGist_1920_2
P06	0 immédiat	objet isole2	brosse	objet isole	New-oldGist	meaningfull	2	r	s	r	172	389	172	gist152_1	1920	R-gist	0	1	4			r	8	8	MF_N_oldGist_1920_2
P06	0 immédiat	fuit/legumes isoles2	poire	fruits/legumes	New-oldGist	meaningfull	2	r	s	r	213	340	213	gist402_2	1920	R-gist	0	1	4			r	8	8	MF_N_oldGist_1920_2
P06	0 immédiat	fuit/legumes isoles26	fromage	fruits/legumes	New-oldGist	meaningfull	2	r	s	r	188	293	188	gist426_1	1920	R-gist	0	1	4			r	8	8	MF_N_oldGist_1920_2
P06	0 immédiat	fuit/legumes isoles42	steak	fruits/legumes	New-oldGist	meaningfull	2	r	s	r	588	770	588	gist442_3	1920	R-gist	0	1	4			r	8	8	MF_N_oldGist_1920_2
P06	0 immédiat	animal11	varan	animal	New	meaningfull	0	r	s	r	172	281	172	gist011_1		R-newgist	0	1	4			r	8	8	MF_new
P06	0 immédiat	animal12	punaise	animal	New	meaningfull	0	z	s	z	324	479	324	gist012_1		R-newgist	0	1	2			z	6	6	MF_new
P06	0 immédiat	animal14	libellule	animal	New	meaningfull	0	r	s	r	188	373	188	gist014_1		R-newgist	0	1	4			r	8	8	MF_new
P06	0 immédiat	animal19	orque	animal	New	meaningfull	0	r	s	r	316	106	316	gist019_1		R-newgist	0	1	4			r	8	8	MF_new
P06	0 immédiat	animal23	buffle	animal	New	meaningfull	0	r	s	r	220	249	220	gist023_1		R-newgist	0	1	4			r	8	8	MF_new
P06	0 immédiat	animal24	hippopotame	animal	New	meaningfull	0	r	s	r	172	352	172	gist024_1		R-newgist	0	1	4			r	8	8	MF_new
P06	0 immédiat	animal32	renard	animal	New	meaningfull	0	r	s	r	76	590	76	gist032_1		R-newgist	0	1	4			r	8	8	MF_new
P06	0 immédiat	animal34	lion	animal	New	meaningfull	0	e	s	e	76	245	76	gist034_4		R-newgist	0	1	3			e	7	7	MF_new
P06	0 immédiat	animal36	chat	animal	New	meaningfull	0	r	s	r	172	234	172	gist036_2		R-newgist	0	1	4			r	8	8	MF_new
P06	0 immédiat	animal46	leopard	animal	New	meaningfull	0	z	s	z	468	725	468	gist046_2		R-newgist	0	1	2			z	6	6	MF_new
P06	0 immédiat	animal120	blereau	animal	New	meaningfull	0	r	s	r	124	300	124	gist050_2		R-newgist	0	1	4			r	8	8	MF_new
P06	0 immédiat	animal55	singe	animal	New	meaningfull	0	r	s	r	116	349	116	gist055_1		R-newgist	0	1	4			r	8	8	MF_new
P06	0 immédiat	animal66	autruche	animal	New	meaningfull	0	r	s	r	1196	776	1196	gist066_1		R-newgist	0	1	4			r	8	8	MF_new
P06	0 immédiat	animal69	oiseau	animal	New	meaningfull	0	r	s	r	372	444	372	gist069_1		R-newgist	0	1	4			r	8	8	MF_new
P06	0 immédiat	animal71	oie	animal	New	meaningfull	0	r	s	r	509	273	509	gist071_1		R-newgist	0	1	4			r	8	8	MF_new
P06	0 immédiat	animal72	oiseau2	animal	New	meaningfull	0	r	s	r	236	663	236	gist072_1		R-newgist	0	1	4			r	8	8	MF_new
P06	0 immédiat	paysage5	coucher de soleil	paysage	New	meaningfull	0	r	s	r	171	323	171	gist105_1		R-newgist	0	1	4			r	8	8	MF_new
P06	0 immédiat	paysage7	foret	paysage	New	meaningfull	0	r	s	r	140	292	140	gist107_2		R-newgist	0	1	4			r	8	8	MF_new
P06	0 immédiat	paysage10	montagne	paysage	New	meaningfull	0	r	s	r	116	330	116	gist110_1		R-newgist	0	1	4			r	8	8	MF_new
P06	0 immédiat	paysage18	neige	paysage	New	meaningfull	0	e	s	e	140	317	140	gist118_1		R-newgist	0	1	3			e	7	7	MF_new
P06	0 immédiat	paysage22	mer/montagne	paysage	New	meaningfull	0	r	s	r	1060	575	1060	gist122_1		R-newgist	0	1	4			r	8	8	MF_new
P06	0 immédiat	paysage26	desert	paysage	New	meaningfull	0	r	s	r	148	259	148	gist126_1		R-newgist	0	1	4			r	8	8	MF_new
P06	0 immédiat	objet isole7	trombone	objet isole	New	meaningfull	0	e	s	e	84	437	84	gist157_1		R-newgist	0	1	3			e	7	7	MF_new
P06	0 immédiat	objet isole9	fil	objet isole	New	meaningfull	0	z	s	z	108	401	108	gist158_1		R-newgist	0	1	2			z	6	6	MF_new
P06	0 immédiat	objet isole15	crayon	objet isole	New	meaningfull	0	e	s	e	164	393	164	gist164_1		R-newgist	0	1	3			e	7	7	MF_new
P06	0 immédiat	objet isole27	pioche	objet isole	New	meaningfull	0	z	s	z	1204	387	1204	gist176_1		R-newgist	0	1	2			z	6	6	MF_new
P06	0 immédiat	objet isole29	mÃ¨che	objet isole	New	meaningfull	0	r	s	r	140	305	140	gist178_1		R-newgist	0	1	4			r	8	8	MF_new
P06	0 immédiat	objet isole30	niveau	objet isole	New	meaningfull	0	r	s	r	268	453	268	gist179_1		R-newgist	0	1	4			r	8	8	MF_new
P06	0 immédiat	fuit/legumes isoles11	kiwi	fruits/legumes	New	meaningfull	0	e	l	e	196	330	196	gist411_1		R-newgist	1	0	3	e	2			2	MF_new
P06	0 immédiat	fuit/legumes isoles13	citron vert	fruits/legumes	New	meaningfull	0	e	s	e	204	327	204	gist413_1		R-newgist	0	1	3			e	7	7	MF_new
P06	0 immédiat	fuit/legumes isoles15	amande	fruits/legumes	New	meaningfull	0	r	s	r	140	461	140	gist415_2		R-newgist	0	1	4			r	8	8	MF_new
P06	0 immédiat	fuit/legumes isoles16	litchi	fruits/legumes	New	meaningfull	0	r	s	r	180	282	180	gist416_1		R-newgist	0	1	4			r	8	8	MF_new
P06	0 immédiat	fuit/legumes isoles17	melon	fruits/legumes	New	meaningfull	0	r	s	r	148	452	148	gist417_1		R-newgist	0	1	4			r	8	8	MF_new
P06	0 immédiat	fuit/legumes isoles20	courgette	fruits/legumes	New	meaningfull	0	e	s	e	1412	462	1412	gist420_1		R-newgist	0	1	3			e	7	7	MF_new
P06	0 immédiat	fuit/legumes isoles21	framboise	fruits/legumes	New	meaningfull	0	r	s	r	300	322	300	gist421_1		R-newgist	0	1	4			r	8	8	MF_new
P06	0 immédiat	fuit/legumes isoles23	gateau	fruits/legumes	New	meaningfull	0	r	s	r	188	731	188	gist423_2		R-newgist	0	1	4			r	8	8	MF_new
P06	0 immédiat	fuit/legumes isoles24	hotdog	fruits/legumes	New	meaningfull	0	r	s	r	365	111	365	gist424_2		R-newgist	0	1	4			r	8	8	MF_new
P06	0 immédiat	fuit/legumes isoles35	patate	fruits/legumes	New	meaningfull	0	e	s	e	76	282	76	gist435_2		R-newgist	0	1	3			e	7	7	MF_new
P06	0 immédiat	fuit/legumes isoles44	noisette	fruits/legumes	New	meaningfull	0	r	s	r	420	564	420	gist444_2		R-newgist	0	1	4			r	8	8	MF_new
P06	0 immédiat	fuit/legumes isoles48	figue	fruits/legumes	New	meaningfull	0	r	s	r	140	255	140	gist448_3		R-newgist	0	1	4			r	8	8	MF_new
P06	0 immédiat	meaningless091	meanigless	meanigless	New	meaningless	0	e	s	e	211	408	211	Image0007		New	0	1	3			e	7	7	ML_new
P06	0 immédiat	meaningless109	meanigless	meanigless	New	meaningless	0	z	s	z	404	298	404	Image0008		New	0	1	2			z	6	6	ML_new
P06	0 immédiat	meaningless127	meanigless	meanigless	New	meaningless	0	z	s	z	260	367	260	Image0011		New	0	1	2			z	6	6	ML_new
P06	0 immédiat	meaningless159	meanigless	meanigless	New	meaningless	0	z	s	z	116	284	116	Image0016		New	0	1	2			z	6	6	ML_new
P06	0 immédiat	meaningless145	meanigless	meanigless	New	meaningless	0	z	s	z	316	360	316	Image0069		New	0	1	2			z	6	6	ML_new
P06	0 immédiat	meaningless092	meanigless	meanigless	New	meaningless	0	z	s	z	100	298	100	Image0084		New	0	1	2			z	6	6	ML_new
P06	0 immédiat	meaningless110	meanigless	meanigless	New	meaningless	0	e	s	e	75	315	75	Image0085		New	0	1	3			e	7	7	ML_new
P06	0 immédiat	meaningless141	meanigless	meanigless	New	meaningless	0	z	s	z	100	391	100	Image0086		New	0	1	2			z	6	6	ML_new
P06	0 immédiat	meaningless160	meanigless	meanigless	New	meaningless	0	z	s	z	324	416	324	Image0089		New	0	1	2			z	6	6	ML_new
P06	0 immédiat	meaningless146	meanigless	meanigless	New	meaningless	0	z	s	z	148	317	148	Image0103		New	0	1	2			z	6	6	ML_new
P06	0 immédiat	meaningless093	meanigless	meanigless	New	meaningless	0	z	s	z	180	432	180	Image0119		New	0	1	2			z	6	6	ML_new
P06	0 immédiat	meaningless111	meanigless	meanigless	New	meaningless	0	z	l	z	189	444	189	Image0122		New	1	0	2	z	3			3	ML_new
P06	0 immédiat	meaningless128	meanigless	meanigless	New	meaningless	0	e	s	e	364	423	364	Image0123		New	0	1	3			e	7	7	ML_new
P06	0 immédiat	meaningless147	meanigless	meanigless	New	meaningless	0	z	s	z	140	590	140	Image0155		New	0	1	2			z	6	6	ML_new
P06	0 immédiat	meaningless094	meanigless	meanigless	New	meaningless	0	e	s	e	300	456	300	Image0171		New	0	1	3			e	7	7	ML_new
P06	0 immédiat	meaningless112	meanigless	meanigless	New	meaningless	0	a	l	a	900	269	900	Image0172		New	1	0	1	a	4			4	ML_new
P06	0 immédiat	meaningless129	meanigless	meanigless	New	meaningless	0	e	s	e	260	480	260	Image0174		New	0	1	3			e	7	7	ML_new
P06	0 immédiat	meaningless105	meanigless	meanigless	New	meaningless	0	z	s	z	124	803	124	Image0201		New	0	1	2			z	6	6	ML_new
P06	0 immédiat	meaningless123	meanigless	meanigless	New	meaningless	0	e	s	e	92	455	92	Image0202		New	0	1	3			e	7	7	ML_new
P06	0 immédiat	meaningless148	meanigless	meanigless	New	meaningless	0	z	s	z	132	392	132	Image0214		New	0	1	2			z	6	6	ML_new
P06	0 immédiat	meaningless095	meanigless	meanigless	New	meaningless	0	e	s	e	484	593	484	Image0235		New	0	1	3			e	7	7	ML_new
P06	0 immédiat	meaningless124	meanigless	meanigless	New	meaningless	0	z	s	z	220	1709	220	Image0239		New	0	1	2			z	6	6	ML_new
P06	0 immédiat	meaningless130	meanigless	meanigless	New	meaningless	0	z	s	z	108	502	108	Image0240		New	0	1	2			z	6	6	ML_new
P06	0 immédiat	meaningless149	meanigless	meanigless	New	meaningless	0	e	s	e	637	519	637	Image0340		New	0	1	3			e	7	7	ML_new
P06	0 immédiat	meaningless087	meanigless	meanigless	New	meaningless	0	z	s	z	180	269	180	Image0381		New	0	1	2			z	6	6	ML_new
P06	0 immédiat	meaningless096	meanigless	meanigless	New	meaningless	0	r	s	r	292	994	292	Image0386		New	0	1	4			r	8	8	ML_new
P06	0 immédiat	meaningless113	meanigless	meanigless	New	meaningless	0	e	s	e	133	428	133	Image0402		New	0	1	3			e	7	7	ML_new
P06	0 immédiat	meaningless131	meanigless	meanigless	New	meaningless	0	e	s	e	76	329	76	Image0403		New	0	1	3			e	7	7	ML_new
P06	0 immédiat	meaningless097	meanigless	meanigless	New	meaningless	0	z	l	z	404	426	404	Image0456		New	1	0	2	z	3			3	ML_new
P06	0 immédiat	meaningless114	meanigless	meanigless	New	meaningless	0	e	s	e	108	710	108	Image0457		New	0	1	3			e	7	7	ML_new
P06	0 immédiat	meaningless132	meanigless	meanigless	New	meaningless	0	e	s	e	155	306	155	Image0458		New	0	1	3			e	7	7	ML_new
P06	0 immédiat	meaningless150	meanigless	meanigless	New	meaningless	0	z	s	z	604	645	604	Image0476		New	0	1	2			z	6	6	ML_new
P06	0 immédiat	meaningless098	meanigless	meanigless	New	meaningless	0	r	s	r	860	615	860	Image0486		New	0	1	4			r	8	8	ML_new
P06	0 immédiat	meaningless115	meanigless	meanigless	New	meaningless	0	e	s	e	652	1683	652	Image0487		New	0	1	3			e	7	7	ML_new
P06	0 immédiat	meaningless133	meanigless	meanigless	New	meaningless	0	e	s	e	268	576	268	Image0488		New	0	1	3			e	7	7	ML_new
P06	0 immédiat	meaningless151	meanigless	meanigless	New	meaningless	0	z	s	z	108	766	108	Image0609		New	0	1	2			z	6	6	ML_new
P06	0 immédiat	meaningless099	meanigless	meanigless	New	meaningless	0	z	l	z	396	524	396	Image0617		New	1	0	2	z	3			3	ML_new
P06	0 immédiat	meaningless116	meanigless	meanigless	New	meaningless	0	z	s	z	148	386	148	Image0618		New	0	1	2			z	6	6	ML_new
P06	0 immédiat	meaningless134	meanigless	meanigless	New	meaningless	0	z	s	z	116	464	116	Image0619		New	0	1	2			z	6	6	ML_new
P06	0 immédiat	meaningless088	meanigless	meanigless	New	meaningless	0	e	s	e	228	321	228	Image0630		New	0	1	3			e	7	7	ML_new
P06	0 immédiat	meaningless152	meanigless	meanigless	New	meaningless	0	e	s	e	196	414	196	Image0635		New	0	1	3			e	7	7	ML_new
P06	0 immédiat	meaningless081	meanigless	meanigless	New	meaningless	0	e	s	e	1204	529	1204	Image0643		New	0	1	3			e	7	7	ML_new
P06	0 immédiat	meaningless100	meanigless	meanigless	New	meaningless	0	e	s	e	148	486	148	Image0644		New	0	1	3			e	7	7	ML_new
P06	0 immédiat	meaningless117	meanigless	meanigless	New	meaningless	0	e	s	e	140	349	140	Image0645		New	0	1	3			e	7	7	ML_new
P06	0 immédiat	meaningless135	meanigless	meanigless	New	meaningless	0	e	s	e	140	400	140	Image0646		New	0	1	3			e	7	7	ML_new
P06	0 immédiat	meaningless153	meanigless	meanigless	New	meaningless	0	e	s	e	204	461	204	Image0664		New	0	1	3			e	7	7	ML_new
P06	0 immédiat	meaningless082	meanigless	meanigless	New	meaningless	0	z	s	z	124	283	124	Image0671		New	0	1	2			z	6	6	ML_new
P06	0 immédiat	meaningless101	meanigless	meanigless	New	meaningless	0	e	s	e	108	383	108	Image0672		New	0	1	3			e	7	7	ML_new
P06	0 immédiat	meaningless118	meanigless	meanigless	New	meaningless	0	e	s	e	124	461	124	Image0673		New	0	1	3			e	7	7	ML_new
P06	0 immédiat	meaningless136	meanigless	meanigless	New	meaningless	0	e	s	e	116	404	116	Image0674		New	0	1	3			e	7	7	ML_new
P06	0 immédiat	meaningless154	meanigless	meanigless	New	meaningless	0	z	s	z	100	377	100	Image0691		New	0	1	2			z	6	6	ML_new
P06	0 immédiat	meaningless083	meanigless	meanigless	New	meaningless	0	z	s	z	124	565	124	Image0698		New	0	1	2			z	6	6	ML_new
P06	0 immédiat	meaningless102	meanigless	meanigless	New	meaningless	0	e	s	e	124	511	124	Image0701		New	0	1	3			e	7	7	ML_new
P06	0 immédiat	meaningless119	meanigless	meanigless	New	meaningless	0	z	s	z	140	287	140	Image0702		New	0	1	2			z	6	6	ML_new
P06	0 immédiat	meaningless137	meanigless	meanigless	New	meaningless	0	e	s	e	460	358	460	Image0704		New	0	1	3			e	7	7	ML_new
P06	0 immédiat	meaningless155	meanigless	meanigless	New	meaningless	0	z	s	z	116	911	116	Image0896		New	0	1	2			z	6	6	ML_new
P06	0 immédiat	meaningless084	meanigless	meanigless	New	meaningless	0	r	s	r	452	485	452	Image0932		New	0	1	4			r	8	8	ML_new
P06	0 immédiat	meaningless103	meanigless	meanigless	New	meaningless	0	e	s	e	132	278	132	Image0933		New	0	1	3			e	7	7	ML_new
P06	0 immédiat	meaningless120	meanigless	meanigless	New	meaningless	0	e	s	e	356	338	356	Image1001		New	0	1	3			e	7	7	ML_new
P06	0 immédiat	meaningless138	meanigless	meanigless	New	meaningless	0	e	s	e	148	395	148	Image1101		New	0	1	3			e	7	7	ML_new
P06	0 immédiat	meaningless156	meanigless	meanigless	New	meaningless	0	e	s	e	500	554	500	Image1207		New	0	1	3			e	7	7	ML_new
P06	0 immédiat	meaningless085	meanigless	meanigless	New	meaningless	0	a	l	a	156	1077	156	Image1215		New	1	0	1	a	4			4	ML_new
P06	0 immédiat	meaningless106	meanigless	meanigless	New	meaningless	0	e	s	e	188	469	188	Image1216		New	0	1	3			e	7	7	ML_new
P06	0 immédiat	meaningless121	meanigless	meanigless	New	meaningless	0	e	s	e	1587	1045	1587	Image1217		New	0	1	3			e	7	7	ML_new
P06	0 immédiat	meaningless139	meanigless	meanigless	New	meaningless	0	a	s	a	828	4259	828	Image1218		New	0	1	1			a	5	5	ML_new
P06	0 immédiat	meaningless142	meanigless	meanigless	New	meaningless	0	e	s	e	124	383	124	Image1232		New	0	1	3			e	7	7	ML_new
P06	0 immédiat	meaningless157	meanigless	meanigless	New	meaningless	0	e	s	e	164	420	164	Image1234		New	0	1	3			e	7	7	ML_new
P06	0 immédiat	meaningless086	meanigless	meanigless	New	meaningless	0	z	s	z	292	674	292	Image1245		New	0	1	2			z	6	6	ML_new
P06	0 immédiat	meaningless104	meanigless	meanigless	New	meaningless	0	z	l	z	276	1657	276	Image1246		New	1	0	2	z	3			3	ML_new
P06	0 immédiat	meaningless122	meanigless	meanigless	New	meaningless	0	e	s	e	124	469	124	Image1247		New	0	1	3			e	7	7	ML_new
P06	0 immédiat	meaningless140	meanigless	meanigless	New	meaningless	0	r	s	r	268	375	268	Image1250		New	0	1	4			r	8	8	ML_new
P06	0 immédiat	meaningless158	meanigless	meanigless	New	meaningless	0	e	s	e	635	782	635	Image1273		New	0	1	3			e	7	7	ML_new
P06	0 immédiat	meaningless089	meanigless	meanigless	New	meaningless	0	e	s	e	364	320	364	R17		New	0	1	3			e	7	7	ML_new
P06	0 immédiat	meaningless107	meanigless	meanigless	New	meaningless	0	e	s	e	164	480	164	R18		New	0	1	3			e	7	7	ML_new
P06	0 immédiat	meaningless125	meanigless	meanigless	New	meaningless	0	z	s	z	132	390	132	R19		New	0	1	2			z	6	6	ML_new
P06	0 immédiat	meaningless143	meanigless	meanigless	New	meaningless	0	z	s	z	516	1345	516	R20		New	0	1	2			z	6	6	ML_new
P06	0 immédiat	meaningless090	meanigless	meanigless	New	meaningless	0	z	s	z	156	580	156	R5		New	0	1	2			z	6	6	ML_new
P06	0 immédiat	meaningless108	meanigless	meanigless	New	meaningless	0	z	s	z	3996	449	3996	R6		New	0	1	2			z	6	6	ML_new
P06	0 immédiat	meaningless126	meanigless	meanigless	New	meaningless	0	z	s	z	44	314	44	R7		New	0	1	2			z	6	6	ML_new
P06	0 immédiat	meaningless144	meanigless	meanigless	New	meaningless	0	e	s	e	1380	492	1380	R8		New	0	1	3			e	7	7	ML_new
P06	0 immédiat	meaningless192	meanigless	meanigless	Old	meaningless	1	z	s	z	244	407	244	Image0090	120	Old	0	1	2			z	6	6	ML_old_120_1
P06	0 immédiat	meaningless224	meanigless	meanigless	Old	meaningless	1	a	s	a	532	669	532	Image0091	120	Old	0	1	1			a	5	5	ML_old_120_1
P06	0 immédiat	meaningless180	meanigless	meanigless	Old	meaningless	1	r	s	r	484	473	484	Image0215	120	Old	0	1	4			r	8	8	ML_old_120_1
P06	0 immédiat	meaningless212	meanigless	meanigless	Old	meaningless	1	z	s	z	124	352	124	Image0220	120	Old	0	1	2			z	6	6	ML_old_120_1
P06	0 immédiat	meaningless164	meanigless	meanigless	Old	meaningless	1	z	s	z	124	895	124	Image0411	120	Old	0	1	2			z	6	6	ML_old_120_1
P06	0 immédiat	meaningless228	meanigless	meanigless	Old	meaningless	1	z	s	z	399	769	399	Image0413	120	Old	0	1	2			z	6	6	ML_old_120_1
P06	0 immédiat	meaningless196	meanigless	meanigless	Old	meaningless	1	z	l	z	180	1367	180	Image0462	120	Old	1	0	2	z	3			3	ML_old_120_1
P06	0 immédiat	meaningless184	meanigless	meanigless	Old	meaningless	1	e	s	e	276	569	276	Image0636	120	Old	0	1	3			e	7	7	ML_old_120_1
P06	0 immédiat	meaningless216	meanigless	meanigless	Old	meaningless	1	r	s	r	220	377	220	Image0637	120	Old	0	1	4			r	8	8	ML_old_120_1
P06	0 immédiat	meaningless168	meanigless	meanigless	Old	meaningless	1	e	s	e	148	305	148	Image0649	120	Old	0	1	3			e	7	7	ML_old_120_1
P06	0 immédiat	meaningless232	meanigless	meanigless	Old	meaningless	1	e	s	e	412	308	412	Image0652	120	Old	0	1	3			e	7	7	ML_old_120_1
P06	0 immédiat	meaningless200	meanigless	meanigless	Old	meaningless	1	z	s	z	460	873	460	Image0677	120	Old	0	1	2			z	6	6	ML_old_120_1
P06	0 immédiat	meaningless188	meanigless	meanigless	Old	meaningless	1	e	s	e	660	981	660	Image1208	120	Old	0	1	3			e	7	7	ML_old_120_1
P06	0 immédiat	meaningless220	meanigless	meanigless	Old	meaningless	1	r	l	r	276	335	276	Image1209	120	Old	1	0	4	r	1			1	ML_old_120_1
P06	0 immédiat	meaningless172	meanigless	meanigless	Old	meaningless	1	e	l	e	2853	2452	2853	Image1220	120	Old	1	0	3	e	2			2	ML_old_120_1
P06	0 immédiat	meaningless204	meanigless	meanigless	Old	meaningless	1	a	s	a	252	682	252	Image1253	120	Old	0	1	1			a	5	5	ML_old_120_1
P06	0 immédiat	meaningless236	meanigless	meanigless	Old	meaningless	1	e	l	e	676	557	676	Image1254	120	Old	1	0	3	e	2			2	ML_old_120_1
P06	0 immédiat	meaningless176	meanigless	meanigless	Old	meaningless	1	e	s	e	212	324	212	R22	120	Old	0	1	3			e	7	7	ML_old_120_1
P06	0 immédiat	meaningless208	meanigless	meanigless	Old	meaningless	1	z	s	z	108	395	108	R23	120	Old	0	1	2			z	6	6	ML_old_120_1
P06	0 immédiat	meaningless240	meanigless	meanigless	Old	meaningless	1	None	s	None	10000	494	10000	R24	120	Old	0	1	Non3			None	Non7	Non7	ML_old_120_1
P06	0 immédiat	meaningless178	meanigless	meanigless	Old	meaningless	2	a	s	a	420	473	420	Image0107	120	Old	0	1	1			a	5	5	ML_old_120_2
P06	0 immédiat	meaningless210	meanigless	meanigless	Old	meaningless	2	e	s	e	164	354	164	Image0108	120	Old	0	1	3			e	7	7	ML_old_120_2
P06	0 immédiat	meaningless162	meanigless	meanigless	Old	meaningless	2	z	s	z	124	269	124	Image0176	120	Old	0	1	2			z	6	6	ML_old_120_2
P06	0 immédiat	meaningless226	meanigless	meanigless	Old	meaningless	2	e	s	e	116	316	116	Image0179	120	Old	0	1	3			e	7	7	ML_old_120_2
P06	0 immédiat	meaningless194	meanigless	meanigless	Old	meaningless	2	e	l	e	244	469	244	Image0243	120	Old	1	0	3	e	2			2	ML_old_120_2
P06	0 immédiat	meaningless182	meanigless	meanigless	Old	meaningless	2	z	l	z	236	446	236	Image0426	120	Old	1	0	2	z	3			3	ML_old_120_2
P06	0 immédiat	meaningless206	meanigless	meanigless	Old	meaningless	2	e	l	e	163	361	163	Image0477	120	Old	1	0	3	e	2			2	ML_old_120_2
P06	0 immédiat	meaningless214	meanigless	meanigless	Old	meaningless	2	r	l	r	228	336	228	Image0478	120	Old	1	0	4	r	1			1	ML_old_120_2
P06	0 immédiat	meaningless166	meanigless	meanigless	Old	meaningless	2	e	s	e	132	360	132	Image0494	120	Old	0	1	3			e	7	7	ML_old_120_2
P06	0 immédiat	meaningless230	meanigless	meanigless	Old	meaningless	2	e	s	e	300	354	300	Image0542	120	Old	0	1	3			e	7	7	ML_old_120_2
P06	0 immédiat	meaningless198	meanigless	meanigless	Old	meaningless	2	z	l	z	244	396	244	Image0622	120	Old	1	0	2	z	3			3	ML_old_120_2
P06	0 immédiat	meaningless238	meanigless	meanigless	Old	meaningless	2	z	s	z	379	383	379	Image0680	120	Old	0	1	2			z	6	6	ML_old_120_2
P06	0 immédiat	meaningless186	meanigless	meanigless	Old	meaningless	2	r	l	r	164	418	164	Image0692	120	Old	1	0	4	r	1			1	ML_old_120_2
P06	0 immédiat	meaningless218	meanigless	meanigless	Old	meaningless	2	r	l	r	388	373	388	Image0693	120	Old	1	0	4	r	1			1	ML_old_120_2
P06	0 immédiat	meaningless170	meanigless	meanigless	Old	meaningless	2	z	l	z	380	323	380	Image0760	120	Old	1	0	2	z	3			3	ML_old_120_2
P06	0 immédiat	meaningless202	meanigless	meanigless	Old	meaningless	2	r	l	r	148	361	148	Image1104	120	Old	1	0	4	r	1			1	ML_old_120_2
P06	0 immédiat	meaningless234	meanigless	meanigless	Old	meaningless	2	r	l	r	275	414	275	Image1105	120	Old	1	0	4	r	1			1	ML_old_120_2
P06	0 immédiat	meaningless174	meanigless	meanigless	Old	meaningless	2	r	l	r	204	409	204	Image1252	120	Old	1	0	4	r	1			1	ML_old_120_2
P06	0 immédiat	meaningless190	meanigless	meanigless	Old	meaningless	2	z	s	z	452	921	452	Image1274	120	Old	0	1	2			z	6	6	ML_old_120_2
P06	0 immédiat	meaningless222	meanigless	meanigless	Old	meaningless	2	r	s	r	164	311	164	Image1277	120	Old	0	1	4			r	8	8	ML_old_120_2
P06	0 immédiat	meaningless191	meanigless	meanigless	Old	meaningless	1	a	l	a	452	2056	452	Image0017	1920	Old	1	0	1	a	4			4	ML_old_1920_1
P06	0 immédiat	meaningless223	meanigless	meanigless	Old	meaningless	1	z	s	z	228	418	228	Image0018	1920	Old	0	1	2			z	6	6	ML_old_1920_1
P06	0 immédiat	meaningless179	meanigless	meanigless	Old	meaningless	1	z	s	z	244	1757	244	Image0157	1920	Old	0	1	2			z	6	6	ML_old_1920_1
P06	0 immédiat	meaningless211	meanigless	meanigless	Old	meaningless	1	r	l	r	172	367	172	Image0162	1920	Old	1	0	4	r	1			1	ML_old_1920_1
P06	0 immédiat	meaningless163	meanigless	meanigless	Old	meaningless	1	z	l	z	276	792	276	Image0242	1920	Old	1	0	2	z	3			3	ML_old_1920_1
P06	0 immédiat	meaningless227	meanigless	meanigless	Old	meaningless	1	z	s	z	60	314	60	Image0246	1920	Old	0	1	2			z	6	6	ML_old_1920_1
P06	0 immédiat	meaningless195	meanigless	meanigless	Old	meaningless	1	r	l	r	292	466	292	Image0412	1920	Old	1	0	4	r	1			1	ML_old_1920_1
P06	0 immédiat	meaningless183	meanigless	meanigless	Old	meaningless	1	r	l	r	188	244	188	Image0610	1920	Old	1	0	4	r	1			1	ML_old_1920_1
P06	0 immédiat	meaningless215	meanigless	meanigless	Old	meaningless	1	z	l	z	1516	101	1516	Image0611	1920	Old	1	0	2	z	3			3	ML_old_1920_1
P06	0 immédiat	meaningless167	meanigless	meanigless	Old	meaningless	1	z	s	z	244	299	244	Image0621	1920	Old	0	1	2			z	6	6	ML_old_1920_1
P06	0 immédiat	meaningless231	meanigless	meanigless	Old	meaningless	1	e	l	e	348	422	348	Image0623	1920	Old	1	0	3	e	2			2	ML_old_1920_1
P06	0 immédiat	meaningless199	meanigless	meanigless	Old	meaningless	1	z	s	z	324	515	324	Image0651	1920	Old	0	1	2			z	6	6	ML_old_1920_1
P06	0 immédiat	meaningless187	meanigless	meanigless	Old	meaningless	1	r	l	r	604	1127	604	Image0897	1920	Old	1	0	4	r	1			1	ML_old_1920_1
P06	0 immédiat	meaningless219	meanigless	meanigless	Old	meaningless	1	r	l	r	204	690	204	Image0916	1920	Old	1	0	4	r	1			1	ML_old_1920_1
P06	0 immédiat	meaningless171	meanigless	meanigless	Old	meaningless	1	r	l	r	188	483	188	Image1103	1920	Old	1	0	4	r	1			1	ML_old_1920_1
P06	0 immédiat	meaningless203	meanigless	meanigless	Old	meaningless	1	z	s	z	724	545	724	Image1221	1920	Old	0	1	2			z	6	6	ML_old_1920_1
P06	0 immédiat	meaningless235	meanigless	meanigless	Old	meaningless	1	z	s	z	100	335	100	Image1222	1920	Old	0	1	2			z	6	6	ML_old_1920_1
P06	0 immédiat	meaningless175	meanigless	meanigless	Old	meaningless	1	z	s	z	292	665	292	R10	1920	Old	0	1	2			z	6	6	ML_old_1920_1
P06	0 immédiat	meaningless207	meanigless	meanigless	Old	meaningless	1	z	l	z	556	909	556	R11	1920	Old	1	0	2	z	3			3	ML_old_1920_1
P06	0 immédiat	meaningless239	meanigless	meanigless	Old	meaningless	1	z	l	z	380	913	380	R12	1920	Old	1	0	2	z	3			3	ML_old_1920_1
P06	0 immédiat	meaningless177	meanigless	meanigless	Old	meaningless	2	e	l	e	604	359	604	Image0070	1920	Old	1	0	3	e	2			2	ML_old_1920_2
P06	0 immédiat	meaningless209	meanigless	meanigless	Old	meaningless	2	e	l	e	276	353	276	Image0071	1920	Old	1	0	3	e	2			2	ML_old_1920_2
P06	0 immédiat	meaningless161	meanigless	meanigless	Old	meaningless	2	r	l	r	164	280	164	Image0128	1920	Old	1	0	4	r	1			1	ML_old_1920_2
P06	0 immédiat	meaningless205	meanigless	meanigless	Old	meaningless	2	r	l	r	180	320	180	Image0129	1920	Old	1	0	4	r	1			1	ML_old_1920_2
P06	0 immédiat	meaningless225	meanigless	meanigless	Old	meaningless	2	z	l	z	1707	637	1707	Image0132	1920	Old	1	0	2	z	3			3	ML_old_1920_2
P06	0 immédiat	meaningless193	meanigless	meanigless	Old	meaningless	2	r	l	r	211	306	211	Image0178	1920	Old	1	0	4	r	1			1	ML_old_1920_2
P06	0 immédiat	meaningless181	meanigless	meanigless	Old	meaningless	2	r	l	r	371	334	371	Image0344	1920	Old	1	0	4	r	1			1	ML_old_1920_2
P06	0 immédiat	meaningless213	meanigless	meanigless	Old	meaningless	2	r	l	r	220	480	220	Image0348	1920	Old	1	0	4	r	1			1	ML_old_1920_2
P06	0 immédiat	meaningless173	meanigless	meanigless	Old	meaningless	2	r	l	r	148	287	148	Image0425	1920	Old	1	0	4	r	1			1	ML_old_1920_2
P06	0 immédiat	meaningless237	meanigless	meanigless	Old	meaningless	2	e	l	e	164	276	164	Image0427	1920	Old	1	0	3	e	2			2	ML_old_1920_2
P06	0 immédiat	meaningless165	meanigless	meanigless	Old	meaningless	2	r	l	r	180	303	180	Image0461	1920	Old	1	0	4	r	1			1	ML_old_1920_2
P06	0 immédiat	meaningless229	meanigless	meanigless	Old	meaningless	2	r	l	r	140	373	140	Image0465	1920	Old	1	0	4	r	1			1	ML_old_1920_2
P06	0 immédiat	meaningless197	meanigless	meanigless	Old	meaningless	2	r	l	r	172	436	172	Image0501	1920	Old	1	0	4	r	1			1	ML_old_1920_2
P06	0 immédiat	meaningless185	meanigless	meanigless	Old	meaningless	2	r	l	r	108	290	108	Image0665	1920	Old	1	0	4	r	1			1	ML_old_1920_2
P06	0 immédiat	meaningless217	meanigless	meanigless	Old	meaningless	2	r	l	r	204	293	204	Image0666	1920	Old	1	0	4	r	1			1	ML_old_1920_2
P06	0 immédiat	meaningless169	meanigless	meanigless	Old	meaningless	2	z	s	z	124	280	124	Image0676	1920	Old	0	1	2			z	6	6	ML_old_1920_2
P06	0 immédiat	meaningless201	meanigless	meanigless	Old	meaningless	2	r	l	r	204	448	204	Image0764	1920	Old	1	0	4	r	1			1	ML_old_1920_2
P06	0 immédiat	meaningless233	meanigless	meanigless	Old	meaningless	2	z	l	z	2756	756	2756	Image0785	1920	Old	1	0	2	z	3			3	ML_old_1920_2
P06	0 immédiat	meaningless189	meanigless	meanigless	Old	meaningless	2	r	l	r	156	341	156	Image1235	1920	Old	1	0	4	r	1			1	ML_old_1920_2
P06	0 immédiat	meaningless221	meanigless	meanigless	Old	meaningless	2	r	l	r	180	279	180	Image1236	1920	Old	1	0	4	r	1			1	ML_old_1920_2
P07	0 immédiat	animal1	escargot	animal	Old	meaningfull	1	z	l	z	220	556	220	gist001_1	120	Old	1	0	2	z	3			3	MF_old_120_1
P07	0 immédiat	animal11	varan	animal	Old	meaningfull	1	e	l	e	891	2328	891	gist011_1	120	Old	1	0	3	e	2			2	MF_old_120_1
P07	0 immédiat	animal16	phoque	animal	Old	meaningfull	1	r	l	r	956	341	956	gist016_1	120	Old	1	0	4	r	1			1	MF_old_120_1
P07	0 immédiat	animal23	buffle	animal	Old	meaningfull	1	r	l	r	284	350	284	gist023_1	120	Old	1	0	4	r	1			1	MF_old_120_1
P07	0 immédiat	animal36	chat	animal	Old	meaningfull	1	r	l	r	267	460	267	gist036_2	120	Old	1	0	4	r	1			1	MF_old_120_1
P07	0 immédiat	animal66	autruche	animal	Old	meaningfull	1	e	l	e	316	543	316	gist066_1	120	Old	1	0	3	e	2			2	MF_old_120_1
P07	0 immédiat	animal68	cygne	animal	Old	meaningfull	1	e	l	e	124	420	124	gist068_1	120	Old	1	0	3	e	2			2	MF_old_120_1
P07	0 immédiat	paysage1	ciel	paysage	Old	meaningfull	1	z	s	z	612	756	612	gist101_1	120	Old	0	1	2			z	6	6	MF_old_120_1
P07	0 immédiat	paysage5	coucher de soleil	paysage	Old	meaningfull	1	r	s	r	100	430	100	gist105_1	120	Old	0	1	4			r	8	8	MF_old_120_1
P07	0 immédiat	paysage17	banquise	paysage	Old	meaningfull	1	e	s	e	260	443	260	gist117_2	120	Old	0	1	3			e	7	7	MF_old_120_1
P07	0 immédiat	paysage22	mer/montagne	paysage	Old	meaningfull	1	z	l	z	843	1471	843	gist122_1	120	Old	1	0	2	z	3			3	MF_old_120_1
P07	0 immédiat	paysage27	fougÃ¨re	paysage	Old	meaningfull	1	r	l	r	92	467	92	gist127_1	120	Old	1	0	4	r	1			1	MF_old_120_1
P07	0 immédiat	objet isole2	brosse	objet isole	Old	meaningfull	1	r	l	r	284	384	284	gist152_1	120	Old	1	0	4	r	1			1	MF_old_120_1
P07	0 immédiat	objet isole15	crayon	objet isole	Old	meaningfull	1	r	l	r	292	343	292	gist164_1	120	Old	1	0	4	r	1			1	MF_old_120_1
P07	0 immédiat	fuit/legumes isoles2	poire	fruits/legumes	Old	meaningfull	1	e	s	e	139	765	139	gist402_2	120	Old	0	1	3			e	7	7	MF_old_120_1
P07	0 immédiat	fuit/legumes isoles11	kiwi	fruits/legumes	Old	meaningfull	1	r	l	r	108	391	108	gist411_1	120	Old	1	0	4	r	1			1	MF_old_120_1
P07	0 immédiat	fuit/legumes isoles17	melon	fruits/legumes	Old	meaningfull	1	e	l	e	628	1186	628	gist417_1	120	Old	1	0	3	e	2			2	MF_old_120_1
P07	0 immédiat	fuit/legumes isoles24	hotdog	fruits/legumes	Old	meaningfull	1	r	l	r	276	337	276	gist424_2	120	Old	1	0	4	r	1			1	MF_old_120_1
P07	0 immédiat	fuit/legumes isoles26	fromage	fruits/legumes	Old	meaningfull	1	r	l	r	156	280	156	gist426_1	120	Old	1	0	4	r	1			1	MF_old_120_1
P07	0 immédiat	fuit/legumes isoles42	steak	fruits/legumes	Old	meaningfull	1	r	l	r	156	433	156	gist442_3	120	Old	1	0	4	r	1			1	MF_old_120_1
P07	0 immédiat	animal4	champigon	animal	Old	meaningfull	2	z	l	z	339	893	339	gist004_2	120	Old	1	0	2	z	3			3	MF_old_120_2
P07	0 immédiat	animal14	libellule	animal	Old	meaningfull	2	r	l	r	140	295	140	gist014_1	120	Old	1	0	4	r	1			1	MF_old_120_2
P07	0 immédiat	animal32	renard	animal	Old	meaningfull	2	r	l	r	428	537	428	gist032_1	120	Old	1	0	4	r	1			1	MF_old_120_2
P07	0 immédiat	animal43	chameau	animal	Old	meaningfull	2	z	s	z	748	498	748	gist043_1	120	Old	0	1	2			z	6	6	MF_old_120_2
P07	0 immédiat	animal120	blereau	animal	Old	meaningfull	2	r	l	r	124	379	124	gist050_2	120	Old	1	0	4	r	1			1	MF_old_120_2
P07	0 immédiat	animal71	oie	animal	Old	meaningfull	2	r	l	r	148	424	148	gist071_1	120	Old	1	0	4	r	1			1	MF_old_120_2
P07	0 immédiat	animal76	paon	animal	Old	meaningfull	2	r	l	r	260	359	260	gist076_1	120	Old	1	0	4	r	1			1	MF_old_120_2
P07	0 immédiat	paysage9	montagne eneige	paysage	Old	meaningfull	2	r	l	r	284	308	284	gist109_1	120	Old	1	0	4	r	1			1	MF_old_120_2
P07	0 immédiat	paysage10	montagne	paysage	Old	meaningfull	2	z	l	z	284	412	284	gist110_1	120	Old	1	0	2	z	3			3	MF_old_120_2
P07	0 immédiat	paysage25	route	paysage	Old	meaningfull	2	r	l	r	196	521	196	gist125_3	120	Old	1	0	4	r	1			1	MF_old_120_2
P07	0 immédiat	paysage30	grotte	paysage	Old	meaningfull	2	r	l	r	131	421	131	gist130_1	120	Old	1	0	4	r	1			1	MF_old_120_2
P07	0 immédiat	objet isole7	trombone	objet isole	Old	meaningfull	2	r	l	r	236	437	236	gist157_1	120	Old	1	0	4	r	1			1	MF_old_120_2
P07	0 immédiat	objet isole12	pinceau	objet isole	Old	meaningfull	2	r	l	r	236	434	236	gist161_1	120	Old	1	0	4	r	1			1	MF_old_120_2
P07	0 immédiat	objet isole29	mÃ¨che	objet isole	Old	meaningfull	2	r	l	r	180	472	180	gist178_1	120	Old	1	0	4	r	1			1	MF_old_120_2
P07	0 immédiat	fuit/legumes isoles6	noix de coco	fruits/legumes	Old	meaningfull	2	r	l	r	220	380	220	gist406_2	120	Old	1	0	4	r	1			1	MF_old_120_2
P07	0 immédiat	fuit/legumes isoles15	amande	fruits/legumes	Old	meaningfull	2	r	l	r	820	478	820	gist415_2	120	Old	1	0	4	r	1			1	MF_old_120_2
P07	0 immédiat	fuit/legumes isoles21	framboise	fruits/legumes	Old	meaningfull	2	r	l	r	251	460	251	gist421_1	120	Old	1	0	4	r	1			1	MF_old_120_2
P07	0 immédiat	fuit/legumes isoles37	pÃªche	fruits/legumes	Old	meaningfull	2	e	l	e	108	305	108	gist437_1	120	Old	1	0	3	e	2			2	MF_old_120_2
P07	0 immédiat	fuit/legumes isoles44	noisette	fruits/legumes	Old	meaningfull	2	r	l	r	900	887	900	gist444_2	120	Old	1	0	4	r	1			1	MF_old_120_2
P07	0 immédiat	fuit/legumes isoles49	kaki	fruits/legumes	Old	meaningfull	2	z	s	z	828	805	828	gist449_1	120	Old	0	1	2			z	6	6	MF_old_120_2
P07	0 immédiat	animal3	sauterelle	animal	Old	meaningfull	1	r	l	r	132	361	132	gist003_2	1920	Old	1	0	4	r	1			1	MF_old_1920_1
P07	0 immédiat	animal12	punaise	animal	Old	meaningfull	1	r	l	r	180	345	180	gist012_1	1920	Old	1	0	4	r	1			1	MF_old_1920_1
P07	0 immédiat	animal24	hippopotame	animal	Old	meaningfull	1	r	l	r	172	318	172	gist024_1	1920	Old	1	0	4	r	1			1	MF_old_1920_1
P07	0 immédiat	animal39	cheval	animal	Old	meaningfull	1	r	l	r	548	926	548	gist039_3	1920	Old	1	0	4	r	1			1	MF_old_1920_1
P07	0 immédiat	animal46	leopard	animal	Old	meaningfull	1	r	l	r	284	558	284	gist046_2	1920	Old	1	0	4	r	1			1	MF_old_1920_1
P07	0 immédiat	animal69	oiseau	animal	Old	meaningfull	1	r	l	r	2356	646	2356	gist069_1	1920	Old	1	0	4	r	1			1	MF_old_1920_1
P07	0 immédiat	animal75	perroquet	animal	Old	meaningfull	1	r	l	r	275	468	275	gist075_1	1920	Old	1	0	4	r	1			1	MF_old_1920_1
P07	0 immédiat	paysage7	foret	paysage	Old	meaningfull	1	r	l	r	75	282	75	gist107_2	1920	Old	1	0	4	r	1			1	MF_old_1920_1
P07	0 immédiat	paysage8	grand canyon	paysage	Old	meaningfull	1	r	l	r	116	296	116	gist108_3	1920	Old	1	0	4	r	1			1	MF_old_1920_1
P07	0 immédiat	paysage23	cascade	paysage	Old	meaningfull	1	r	l	r	284	347	284	gist123_1	1920	Old	1	0	4	r	1			1	MF_old_1920_1
P07	0 immédiat	paysage26	desert	paysage	Old	meaningfull	1	r	s	r	268	353	268	gist126_1	1920	Old	0	1	4			r	8	8	MF_old_1920_1
P07	0 immédiat	paysage28	farwest	paysage	Old	meaningfull	1	r	s	r	148	321	148	gist128_1	1920	Old	0	1	4			r	8	8	MF_old_1920_1
P07	0 immédiat	objet isole10	marteau	objet isole	Old	meaningfull	1	None	None	None	10000	10001	10000	gist159_1	1920	Old	None	0	Non3						MF_old_1920_1
P07	0 immédiat	objet isole27	pioche	objet isole	Old	meaningfull	1	r	l	r	324	353	324	gist176_1	1920	Old	1	0	4	r	1			1	MF_old_1920_1
P07	0 immédiat	fuit/legumes isoles4	banane	fruits/legumes	Old	meaningfull	1	r	l	r	268	545	268	gist404_1	1920	Old	1	0	4	r	1			1	MF_old_1920_1
P07	0 immédiat	fuit/legumes isoles13	citron vert	fruits/legumes	Old	meaningfull	1	z	s	z	1212	1478	1212	gist413_1	1920	Old	0	1	2			z	6	6	MF_old_1920_1
P07	0 immédiat	fuit/legumes isoles20	courgette	fruits/legumes	Old	meaningfull	1	r	l	r	652	592	652	gist420_1	1920	Old	1	0	4	r	1			1	MF_old_1920_1
P07	0 immédiat	fuit/legumes isoles27	pain	fruits/legumes	Old	meaningfull	1	r	l	r	124	385	124	gist427_1	1920	Old	1	0	4	r	1			1	MF_old_1920_1
P07	0 immédiat	fuit/legumes isoles35	patate	fruits/legumes	Old	meaningfull	1	r	l	r	315	529	315	gist435_2	1920	Old	1	0	4	r	1			1	MF_old_1920_1
P07	0 immédiat	fuit/legumes isoles46	Å“uf	fruits/legumes	Old	meaningfull	1	r	l	r	252	340	252	gist447_3	1920	Old	1	0	4	r	1			1	MF_old_1920_1
P07	0 immédiat	animal15	poisson	animal	Old	meaningfull	2	r	l	r	163	770	163	gist015_1	1920	Old	1	0	4	r	1			1	MF_old_1920_2
P07	0 immédiat	animal19	orque	animal	Old	meaningfull	2	r	l	r	356	521	356	gist019_1	1920	Old	1	0	4	r	1			1	MF_old_1920_2
P07	0 immédiat	animal34	lion	animal	Old	meaningfull	2	r	l	r	227	386	227	gist034_4	1920	Old	1	0	4	r	1			1	MF_old_1920_2
P07	0 immédiat	animal47	chevre	animal	Old	meaningfull	2	r	l	r	348	440	348	gist047_1	1920	Old	1	0	4	r	1			1	MF_old_1920_2
P07	0 immédiat	animal55	singe	animal	Old	meaningfull	2	r	l	r	148	323	148	gist055_1	1920	Old	1	0	4	r	1			1	MF_old_1920_2
P07	0 immédiat	animal72	oiseau2	animal	Old	meaningfull	2	r	l	r	844	605	844	gist072_1	1920	Old	1	0	4	r	1			1	MF_old_1920_2
P07	0 immédiat	animal78	casoar	animal	Old	meaningfull	2	e	l	e	268	362	268	gist078_1	1920	Old	1	0	3	e	2			2	MF_old_1920_2
P07	0 immédiat	paysage15	fond marin	paysage	Old	meaningfull	2	r	l	r	156	336	156	gist115_1	1920	Old	1	0	4	r	1			1	MF_old_1920_2
P07	0 immédiat	paysage18	neige	paysage	Old	meaningfull	2	r	l	r	108	479	108	gist118_1	1920	Old	1	0	4	r	1			1	MF_old_1920_2
P07	0 immédiat	paysage25	route	paysage	Old	meaningfull	2	r	l	r	164	559	164	gist125_5	1920	Old	1	0	4	r	1			1	MF_old_1920_2
P07	0 immédiat	objet isole1	balle	objet isole	Old	meaningfull	2	r	l	r	444	1717	444	gist151_1	1920	Old	1	0	4	r	1			1	MF_old_1920_2
P07	0 immédiat	objet isole9	fil	objet isole	Old	meaningfull	2	r	l	r	284	413	284	gist158_1	1920	Old	1	0	4	r	1			1	MF_old_1920_2
P07	0 immédiat	objet isole17	compa	objet isole	Old	meaningfull	2	r	l	r	116	402	116	gist166_1	1920	Old	1	0	4	r	1			1	MF_old_1920_2
P07	0 immédiat	objet isole30	niveau	objet isole	Old	meaningfull	2	r	l	r	2684	2634	2684	gist179_1	1920	Old	1	0	4	r	1			1	MF_old_1920_2
P07	0 immédiat	fuit/legumes isoles16	litchi	fruits/legumes	Old	meaningfull	2	r	l	r	100	281	100	gist416_1	1920	Old	1	0	4	r	1			1	MF_old_1920_2
P07	0 immédiat	fuit/legumes isoles22	mais	fruits/legumes	Old	meaningfull	2	r	l	r	235	436	235	gist422_2	1920	Old	1	0	4	r	1			1	MF_old_1920_2
P07	0 immédiat	fuit/legumes isoles23	gateau	fruits/legumes	Old	meaningfull	2	r	l	r	148	379	148	gist423_2	1920	Old	1	0	4	r	1			1	MF_old_1920_2
P07	0 immédiat	fuit/legumes isoles38	brocoli	fruits/legumes	Old	meaningfull	2	r	l	r	147	479	147	gist438_2	1920	Old	1	0	4	r	1			1	MF_old_1920_2
P07	0 immédiat	fuit/legumes isoles48	figue	fruits/legumes	Old	meaningfull	2	r	l	r	268	88	268	gist448_3	1920	Old	1	0	4	r	1			1	MF_old_1920_2
[truncated: 9,521 more rows]

## Sheet: children
participants	Delay	caracteristique	categorie_base	categorie_sub	condition	Type	repetition	response	response_response_image	response_response_masque	response_time	response_time_response_image	response_time_response_masque	stim	time_presentation	condition	Hit.FA	Rejet	confiance		confHitFA		Conf rejetmiss	ROC Index	condition		Data used for analyses
1	0 immédiat	animal5	papillon	animal	Old	meaningfull	1 répétition	r	l	r	149	652	149	gist005_1	120 ms	Old	1		4	r	1			1	MF_old_120_1
1	0 immédiat	animal17	dauphin	animal	Old	meaningfull	1 répétition	r	l	r	153	424	153	gist017_2	120 ms	Old	1		4	r	1			1	MF_old_120_1		Condition = Z		Confidance = I
1	0 immédiat	animal26	ours	animal	Old	meaningfull	1 répétition	r	s	r	139	1128	139	gist026_2	120 ms	Old	0	1	4			r	8	8	MF_old_120_1				a = just guessing
1	0 immédiat	animal35	tigre	animal	Old	meaningfull	1 répétition	r	l	r	776	419	776	gist035_2	120 ms	Old	1		4	r	1			1	MF_old_120_1		MF_old_120_1 = meaningful _old _120ms _1 presentation		z = not sure
1	0 immédiat	animal42	giraffe	animal	Old	meaningfull	1 répétition	r	l	r	150	440	150	gist042_3	120 ms	Old	1		4	r	1			1	MF_old_120_1		MF_old_120_2 = meaningful _old _120ms _2 presentations		e = confident
1	0 immédiat	animal52	bouc	animal	Old	meaningfull	1 répétition	r	l	r	168	387	168	gist052_2	120 ms	Old	1		3	r	1			1	MF_old_120_1		MF_old_1920_1 = meaningful _old _1920ms _1 presentation		r = very sure
1	0 immédiat	animal60	panthère noire	animal	Old	meaningfull	1 répétition	r	l	r	387	506	387	gist060_2	120 ms	Old	1		4	r	1			1	MF_old_120_1		MF_old_1920_2 = meaningful _old _1920ms _2 presentations
1	0 immédiat	animal79	cigogne	animal	Old	meaningfull	1 répétition	e	s	e	2134	713	2134	gist079_1	120 ms	Old	0	1	4			e	7	7	MF_old_120_1				reponse image = J
1	0 immédiat	fuit/legumes isoles9	pasteque	fruits/legumes	Old	meaningfull	1 répétition	r	l	r	67	311	67	gist409_1	120 ms	Old	1		4	r	1			1	MF_old_120_1				l = vu
1	0 immédiat	fuit/legumes isoles30	choux	fruits/legumes	Old	meaningfull	1 répétition	r	l	r	159	450	159	gist430_2	120 ms	Old	1		4	r	1			1	MF_old_120_1		MF_N_oldGist_120_1 = meaningful _New old-gist lures _120ms _1 presentation		s = pas vu
1	0 immédiat	fuit/legumes isoles36	paplemousse	fruits/legumes	Old	meaningfull	1 répétition	r	l	r	176	1644	176	gist436_2	120 ms	Old	1		4	r	1			1	MF_old_120_1		MF_N_oldGist_120_2 = meaningful _New old-gist lures _120ms _2 presentations
1	0 immédiat	fuit/legumes isoles45	haricot	fruits/legumes	Old	meaningfull	1 répétition	z	s	z	335	1552	335	gist446_2	120 ms	Old	0	1	4			z	6	6	MF_old_120_1		MF_N_oldGist_1920_1 = meaningful _New old-gist lures _1920ms _1 presentation
1	0 immédiat	fuit/legumes isoles56	poivron	fruits/legumes	Old	meaningfull	1 répétition	r	s	r	0	430	0	gist457_1	120 ms	Old	0	1	4			r	8	8	MF_old_120_1		MF_N_oldGist_1920_2 = meaningful _New old-gist lures _1920ms _2 presentations
1	0 immédiat	objet isole5	eponde	objet isole	Old	meaningfull	1 répétition	r	l	r	907	392	907	gist155_1	120 ms	Old	1		4	r	1			1	MF_old_120_1
1	0 immédiat	objet isole13	ciseau	objet isole	Old	meaningfull	1 répétition	r	l	r	289	371	289	gist162_1	120 ms	Old	1		4	r	1			1	MF_old_120_1
1	0 immédiat	objet isole23	des	objet isole	Old	meaningfull	1 répétition	r	l	r	231	467	231	gist172_1	120 ms	Old	1		2	r	1			1	MF_old_120_1		MF_new = meaningful New
1	0 immédiat	objet isole31	spatule	objet isole	Old	meaningfull	1 répétition	r	l	r	97	1508	97	gist180_1	120 ms	Old	1		4	r	1			1	MF_old_120_1
1	0 immédiat	paysage7	foret	paysage	Old	meaningfull	1 répétition	r	s	r	271	366	271	gist107_1	120 ms	Old	0	1	4			r	8	8	MF_old_120_1
1	0 immédiat	paysage19	champ	paysage	Old	meaningfull	1 répétition	r	l	r	222	365	222	gist119_1	120 ms	Old	1		4	r	1			1	MF_old_120_1		ML_old_120_1 = meaningless _old _120ms _1 presentation
1	0 immédiat	paysage25	route	paysage	Old	meaningfull	1 répétition	e	l	e	142	463	142	gist125_4	120 ms	Old	1		4	e	2			2	MF_old_120_1		ML_old_120_2 = meaningless _old _120ms _2 presentations
1	0 immédiat	animal8	tortue	animal	Old	meaningfull	2 répétitions	r	l	r	187	387	187	gist008_1	120 ms	Old	1		4	r	1			1	MF_old_120_2		ML_old_1920_1 = meaningless _old _1920ms _1 presentation
1	0 immédiat	animal21	rinoceroce	animal	Old	meaningfull	2 répétitions	r	l	r	183	583	183	gist021_1	120 ms	Old	1		4	r	1			1	MF_old_120_2		ML_old_1920_2 = meaningless _old _1920ms _2 presentations
1	0 immédiat	animal31	loup	animal	Old	meaningfull	2 répétitions	z	l	z	1241	3541	1241	gist031_1	120 ms	Old	1		2	z	3			3	MF_old_120_2
1	0 immédiat	animal40	cerf	animal	Old	meaningfull	2 répétitions	r	l	r	206	401	206	gist040_2	120 ms	Old	1		2	r	1			1	MF_old_120_2		ML_new = meaningless New
1	0 immédiat	animal45	kangourou	animal	Old	meaningfull	2 répétitions	r	l	r	195	564	195	gist045_1	120 ms	Old	1		4	r	1			1	MF_old_120_2
1	0 immédiat	animal54	mouton	animal	Old	meaningfull	2 répétitions	r	l	r	61	289	61	gist054_1	120 ms	Old	1		4	r	1			1	MF_old_120_2		ROC index = Y
1	0 immédiat	animal67	pinguin	animal	Old	meaningfull	2 répétitions	r	l	r	91	174	91	gist067_1	120 ms	Old	1		2	r	1			1	MF_old_120_2		1-4 : Hit/FA (from very sure to guess)
1	0 immédiat	fuit/legumes isoles3	orange	fruits/legumes	Old	meaningfull	2 répétitions	r	l	r	69	451	69	gist403_2	120 ms	Old	1		4	r	1			1	MF_old_120_2		5-8 : miss/correct rejection (from guess to very sure)
1	0 immédiat	fuit/legumes isoles19	tomate	fruits/legumes	Old	meaningfull	2 répétitions	r	l	r	162	332	162	gist419_1	120 ms	Old	1		4	r	1			1	MF_old_120_2
1	0 immédiat	fuit/legumes isoles33	myrtille	fruits/legumes	Old	meaningfull	2 répétitions	r	l	r	280	322	280	gist433_2	120 ms	Old	1		3	r	1			1	MF_old_120_2
1	0 immédiat	fuit/legumes isoles40	jambon	fruits/legumes	Old	meaningfull	2 répétitions	r	l	r	59	288	59	gist440_2	120 ms	Old	1		4	r	1			1	MF_old_120_2		participant = A
1	0 immédiat	fuit/legumes isoles51	blette	fruits/legumes	Old	meaningfull	2 répétitions	r	l	r	183	486	183	gist451_2	120 ms	Old	1		4	r	1			1	MF_old_120_2		Delay = B
1	0 immédiat	fuit/legumes isoles59	radis	fruits/legumes	Old	meaningfull	2 répétitions	r	l	r	134	369	134	gist461_1	120 ms	Old	1		4	r	1			1	MF_old_120_2		Hit/FA = R
1	0 immédiat	objet isole3	brosse à dent	objet isole	Old	meaningfull	2 répétitions	r	l	r	254	333	254	gist153_1	120 ms	Old	1		4	r	1			1	MF_old_120_2
1	0 immédiat	objet isole11	toune_visse	objet isole	Old	meaningfull	2 répétitions	r	l	r	193	495	193	gist160_1	120 ms	Old	1		4	r	1			1	MF_old_120_2
1	0 immédiat	objet isole16	couverts	objet isole	Old	meaningfull	2 répétitions	r	s	r	138	1752	138	gist165_1	120 ms	Old	0	1	4			r	8	8	MF_old_120_2
1	0 immédiat	objet isole26	scie	objet isole	Old	meaningfull	2 répétitions	r	l	r	270	354	270	gist175_1	120 ms	Old	1		4	r	1			1	MF_old_120_2
1	0 immédiat	paysage2	plage	paysage	Old	meaningfull	2 répétitions	r	l	r	123	950	123	gist102_1	120 ms	Old	1		2	r	1			1	MF_old_120_2
1	0 immédiat	paysage13	desert:steppe	paysage	Old	meaningfull	2 répétitions	r	l	r	62	324	62	gist113_2	120 ms	Old	1		4	r	1			1	MF_old_120_2
1	0 immédiat	paysage25	route	paysage	Old	meaningfull	2 répétitions	r	l	r	343	640	343	gist125_1	120 ms	Old	1		4	r	1			1	MF_old_120_2
1	0 immédiat	animal6	grenouille	animal	Old	meaningfull	1 répétition	r	l	r	253	745	253	gist006_1	1920 ms	Old	1		4	r	1			1	MF_old_1920_1
1	0 immédiat	animal18	ours polaire	animal	Old	meaningfull	1 répétition	r	l	r	50	347	50	gist018_2	1920 ms	Old	1		4	r	1			1	MF_old_1920_1
1	0 immédiat	animal30	chien	animal	Old	meaningfull	1 répétition	r	l	r	214	381	214	gist030_1	1920 ms	Old	1		4	r	1			1	MF_old_1920_1
1	0 immédiat	animal38	zebre	animal	Old	meaningfull	1 répétition	r	l	r	177	479	177	gist038_1	1920 ms	Old	1		4	r	1			1	MF_old_1920_1
1	0 immédiat	animal44	vache	animal	Old	meaningfull	1 répétition	e	l	e	794	2089	794	gist044_2	1920 ms	Old	1		4	e	2			2	MF_old_1920_1
1	0 immédiat	animal53	bison	animal	Old	meaningfull	1 répétition	r	l	r	62	304	62	gist053_1	1920 ms	Old	1		4	r	1			1	MF_old_1920_1
1	0 immédiat	animal62	ane	animal	Old	meaningfull	1 répétition	r	l	r	175	551	175	gist062_1	1920 ms	Old	1		4	r	1			1	MF_old_1920_1
1	0 immédiat	animal80	coq	animal	Old	meaningfull	1 répétition	r	l	r	134	424	134	gist080_1	1920 ms	Old	1		4	r	1			1	MF_old_1920_1
1	0 immédiat	fuit/legumes isoles1	pomme	fruits/legumes	Old	meaningfull	1 répétition	r	l	r	236	665	236	gist401_1	1920 ms	Old	1		4	r	1			1	MF_old_1920_1
1	0 immédiat	fuit/legumes isoles18	champignion	fruits/legumes	Old	meaningfull	1 répétition	r	l	r	47	440	47	gist418_2	1920 ms	Old	1		4	r	1			1	MF_old_1920_1
1	0 immédiat	fuit/legumes isoles32	cacahouette	fruits/legumes	Old	meaningfull	1 répétition	r	l	r	53	369	53	gist432_2	1920 ms	Old	1		4	r	1			1	MF_old_1920_1
1	0 immédiat	fuit/legumes isoles39	poulet	fruits/legumes	Old	meaningfull	1 répétition	r	l	r	331	576	331	gist439_2	1920 ms	Old	1		4	r	1			1	MF_old_1920_1
1	0 immédiat	fuit/legumes isoles47	avocat	fruits/legumes	Old	meaningfull	1 répétition	r	l	r	244	595	244	gist448_1	1920 ms	Old	1		4	r	1			1	MF_old_1920_1
1	0 immédiat	fuit/legumes isoles58	croissant	fruits/legumes	Old	meaningfull	1 répétition	r	l	r	183	369	183	gist460_1	1920 ms	Old	1		4	r	1			1	MF_old_1920_1
1	0 immédiat	objet isole4	peigne	objet isole	Old	meaningfull	1 répétition	r	l	r	353	379	353	gist154_1	1920 ms	Old	1		4	r	1			1	MF_old_1920_1
1	0 immédiat	objet isole14	pince à linge	objet isole	Old	meaningfull	1 répétition	r	l	r	269	728	269	gist163_1	1920 ms	Old	1		4	r	1			1	MF_old_1920_1
1	0 immédiat	objet isole24	pince	objet isole	Old	meaningfull	1 répétition	r	l	r	225	521	225	gist173_1	1920 ms	Old	1		4	r	1			1	MF_old_1920_1
1	0 immédiat	paysage11	montagne	paysage	Old	meaningfull	1 répétition	r	s	r	195	619	195	gist111_1	1920 ms	Old	0	1	4			r	8	8	MF_old_1920_1
1	0 immédiat	paysage20	champ	paysage	Old	meaningfull	1 répétition	r	l	r	215	409	215	gist120_1	1920 ms	Old	1		4	r	1			1	MF_old_1920_1
1	0 immédiat	paysage25	route	paysage	Old	meaningfull	1 répétition	r	l	r	241	396	241	gist125_2	1920 ms	Old	1		2	r	1			1	MF_old_1920_1
1	0 immédiat	animal13	chenille	animal	Old	meaningfull	2 répétitions	r	l	r	386	518	386	gist013_2	1920 ms	Old	1		4	r	1			1	MF_old_1920_2
1	0 immédiat	animal22	elephant	animal	Old	meaningfull	2 répétitions	r	l	r	1025	497	1025	gist022_2	1920 ms	Old	1		4	r	1			1	MF_old_1920_2
1	0 immédiat	animal33	panthère	animal	Old	meaningfull	2 répétitions	r	l	r	1569	391	1569	gist033_1	1920 ms	Old	1		4	r	1			1	MF_old_1920_2
1	0 immédiat	animal41	oxyx	animal	Old	meaningfull	2 répétitions	r	l	r	179	404	179	gist041_2	1920 ms	Old	1		4	r	1			1	MF_old_1920_2
1	0 immédiat	animal48	ecureuil	animal	Old	meaningfull	2 répétitions	r	l	r	242	521	242	gist048_1	1920 ms	Old	1		4	r	1			1	MF_old_1920_2
1	0 immédiat	animal56	gorille	animal	Old	meaningfull	2 répétitions	e	l	e	337	670	337	gist056_1	1920 ms	Old	1		4	e	2			2	MF_old_1920_2
1	0 immédiat	animal77	flaman rose	animal	Old	meaningfull	2 répétitions	r	l	r	222	351	222	gist077_1	1920 ms	Old	1		4	r	1			1	MF_old_1920_2
1	0 immédiat	fuit/legumes isoles5	raisin	fruits/legumes	Old	meaningfull	2 répétitions	r	l	r	9	316	9	gist405_1	1920 ms	Old	1		4	r	1			1	MF_old_1920_2
1	0 immédiat	fuit/legumes isoles28	cookies	fruits/legumes	Old	meaningfull	2 répétitions	r	l	r	165	440	165	gist428_2	1920 ms	Old	1		4	r	1			1	MF_old_1920_2
1	0 immédiat	fuit/legumes isoles34	mur	fruits/legumes	Old	meaningfull	2 répétitions	r	l	r	228	427	228	gist434_2	1920 ms	Old	1		Non3	r	1			1	MF_old_1920_2
1	0 immédiat	fuit/legumes isoles43	cafe	fruits/legumes	Old	meaningfull	2 répétitions	r	l	r	131	574	131	gist443_2	1920 ms	Old	1		4	r	1			1	MF_old_1920_2
1	0 immédiat	fuit/legumes isoles52	datte	fruits/legumes	Old	meaningfull	2 répétitions	r	l	r	219	445	219	gist452_3	1920 ms	Old	1		4	r	1			1	MF_old_1920_2
1	0 immédiat	fuit/legumes isoles60	carotte	fruits/legumes	Old	meaningfull	2 répétitions	r	l	r	111	337	111	gist462_1	1920 ms	Old	1		4	r	1			1	MF_old_1920_2
1	0 immédiat	objet isole8	epingles nourisse	objet isole	Old	meaningfull	2 répétitions	r	l	r	336	365	336	gist157_2	1920 ms	Old	1		4	r	1			1	MF_old_1920_2
1	0 immédiat	objet isole22	raquette	objet isole	Old	meaningfull	2 répétitions	r	l	r	230	392	230	gist171_1	1920 ms	Old	1		3	r	1			1	MF_old_1920_2
1	0 immédiat	objet isole28	cle	objet isole	Old	meaningfull	2 répétitions	r	l	r	229	795	229	gist177_1	1920 ms	Old	1		4	r	1			1	MF_old_1920_2
1	0 immédiat	paysage4	rocher	paysage	Old	meaningfull	2 répétitions	r	l	r	166	442	166	gist104_2	1920 ms	Old	1		4	r	1			1	MF_old_1920_2
1	0 immédiat	paysage16	champ de fleur	paysage	Old	meaningfull	2 répétitions	r	l	r	31	353	31	gist116_1	1920 ms	Old	1		4	r	1			1	MF_old_1920_2
1	0 immédiat	paysage25	route	paysage	Old	meaningfull	2 répétitions	r	l	r	119	308	119	gist125_10	1920 ms	Old	1		4	r	1			1	MF_old_1920_2
1	0 immédiat	paysage25	route	paysage	Old	meaningfull	2 répétitions	r	l	r	278	481	278	gist125_8	1920 ms	Old	1		4	r	1			1	MF_old_1920_2
1	0 immédiat	animal1	escargot	animal	New-oldGist	meaningfull	1 répétition	e	s	e	1173	1842	1173	gist001_2	120 ms	R-gist	0	1	4			e	7	7	MF_N_oldGist_120_1
1	0 immédiat	animal16	phoque	animal	New-oldGist	meaningfull	1 répétition	e	s	e	345	2800	345	gist016_2	120 ms	R-gist	0	1	4			e	7	7	MF_N_oldGist_120_1
1	0 immédiat	animal68	cygne	animal	New-oldGist	meaningfull	1 répétition	r	s	r	179	440	179	gist068_2	120 ms	R-gist	0	1	4			r	8	8	MF_N_oldGist_120_1
1	0 immédiat	fuit/legumes isoles2	poire	fruits/legumes	New-oldGist	meaningfull	1 répétition	r	s	r	497	385	497	gist402_1	120 ms	R-gist	0	1	3			r	8	8	MF_N_oldGist_120_1
1	0 immédiat	fuit/legumes isoles26	fromage	fruits/legumes	New-oldGist	meaningfull	1 répétition	r	s	r	171	390	171	gist426_2	120 ms	R-gist	0	1	4			r	8	8	MF_N_oldGist_120_1
1	0 immédiat	fuit/legumes isoles42	steak	fruits/legumes	New-oldGist	meaningfull	1 répétition	e	s	e	1156	3276	1156	gist442_2	120 ms	R-gist	0	1	4			e	7	7	MF_N_oldGist_120_1
1	0 immédiat	objet isole2	brosse	objet isole	New-oldGist	meaningfull	1 répétition	r	s	r	101	376	101	gist152_2	120 ms	R-gist	0	1	4			r	8	8	MF_N_oldGist_120_1
1	0 immédiat	paysage1	ciel	paysage	New-oldGist	meaningfull	1 répétition	r	s	r	606	448	606	gist101_2	120 ms	R-gist	0	1	4			r	8	8	MF_N_oldGist_120_1
1	0 immédiat	paysage17	banquise	paysage	New-oldGist	meaningfull	1 répétition	r	s	r	97	334	97	gist117_1	120 ms	R-gist	0	1	4			r	8	8	MF_N_oldGist_120_1
1	0 immédiat	paysage27	fougère	paysage	New-oldGist	meaningfull	1 répétition	z	s	z	766	674	766	gist127_2	120 ms	R-gist	0	1	3			z	6	6	MF_N_oldGist_120_1
1	0 immédiat	animal4	champigon	animal	New-oldGist	meaningfull	2 répétitions	e	s	e	206	453	206	gist004_1	120 ms	R-gist	0	1	4			e	7	7	MF_N_oldGist_120_2
1	0 immédiat	animal43	chameau	animal	New-oldGist	meaningfull	2 répétitions	r	s	r	288	542	288	gist043_2	120 ms	R-gist	0	1	3			r	8	8	MF_N_oldGist_120_2
1	0 immédiat	animal76	paon	animal	New-oldGist	meaningfull	2 répétitions	r	s	r	354	542	354	gist076_2	120 ms	R-gist	0	1	4			r	8	8	MF_N_oldGist_120_2
1	0 immédiat	fuit/legumes isoles6	noix de coco	fruits/legumes	New-oldGist	meaningfull	2 répétitions	r	s	r	227	609	227	gist406_1	120 ms	R-gist	0	1	4			r	8	8	MF_N_oldGist_120_2
1	0 immédiat	fuit/legumes isoles37	pêche	fruits/legumes	New-oldGist	meaningfull	2 répétitions	r	s	r	105	440	105	gist437_3	120 ms	R-gist	0	1	2			r	8	8	MF_N_oldGist_120_2
1	0 immédiat	fuit/legumes isoles49	kaki	fruits/legumes	New-oldGist	meaningfull	2 répétitions	e	s	e	231	562	231	gist449_2	120 ms	R-gist	0	1	4			e	7	7	MF_N_oldGist_120_2
1	0 immédiat	objet isole12	pinceau	objet isole	New-oldGist	meaningfull	2 répétitions	r	s	r	1997	1804	1997	gist161_2	120 ms	R-gist	0	1	2			r	8	8	MF_N_oldGist_120_2
1	0 immédiat	paysage9	montagne eneige	paysage	New-oldGist	meaningfull	2 répétitions	e	s	e	307	1701	307	gist109_2	120 ms	R-gist	0	1	4			e	7	7	MF_N_oldGist_120_2
1	0 immédiat	paysage25	route	paysage	New-oldGist	meaningfull	2 répétitions	r	s	r	211	545	211	gist125_6	120 ms	R-gist	0	1	2			r	8	8	MF_N_oldGist_120_2
1	0 immédiat	paysage30	grotte	paysage	New-oldGist	meaningfull	2 répétitions	e	s	e	1761	745	1761	gist130_2	120 ms	R-gist	0	1	3			e	7	7	MF_N_oldGist_120_2
1	0 immédiat	animal3	sauterelle	animal	New-oldGist	meaningfull	1 répétition	r	s	r	237	931	237	gist003_1	1920 ms	R-gist	0	1	4			r	8	8	MF_N_oldGist_1920_1
1	0 immédiat	animal39	cheval	animal	New-oldGist	meaningfull	1 répétition	r	s	r	311	1101	311	gist039_1	1920 ms	R-gist	0	1	4			r	8	8	MF_N_oldGist_1920_1
1	0 immédiat	animal75	perroquet	animal	New-oldGist	meaningfull	1 répétition	r	s	r	269	389	269	gist075_2	1920 ms	R-gist	0	1	2			r	8	8	MF_N_oldGist_1920_1
1	0 immédiat	fuit/legumes isoles4	banane	fruits/legumes	New-oldGist	meaningfull	1 répétition	r	s	r	275	1037	275	gist404_3	1920 ms	R-gist	0	1	4			r	8	8	MF_N_oldGist_1920_1
1	0 immédiat	fuit/legumes isoles27	pain	fruits/legumes	New-oldGist	meaningfull	1 répétition	r	s	r	177	693	177	gist427_2	1920 ms	R-gist	0	1	3			r	8	8	MF_N_oldGist_1920_1
1	0 immédiat	fuit/legumes isoles46	œuf	fruits/legumes	New-oldGist	meaningfull	1 répétition	r	s	r	201	500	201	gist447_2	1920 ms	R-gist	0	1	4			r	8	8	MF_N_oldGist_1920_1
1	0 immédiat	objet isole10	marteau	objet isole	New-oldGist	meaningfull	1 répétition	e	s	e	699	632	699	gist159_2	1920 ms	R-gist	0	1	2			e	7	7	MF_N_oldGist_1920_1
1	0 immédiat	paysage8	grand canyon	paysage	New-oldGist	meaningfull	1 répétition	r	s	r	425	1326	425	gist108_2	1920 ms	R-gist	0	1	4			r	8	8	MF_N_oldGist_1920_1
1	0 immédiat	paysage23	cascade	paysage	New-oldGist	meaningfull	1 répétition	r	s	r	620	1010	620	gist123_2	1920 ms	R-gist	0	1	4			r	8	8	MF_N_oldGist_1920_1
1	0 immédiat	paysage28	farwest	paysage	New-oldGist	meaningfull	1 répétition	r	s	r	175	1665	175	gist128_2	1920 ms	R-gist	0	1	4			r	8	8	MF_N_oldGist_1920_1
1	0 immédiat	animal15	poisson	animal	New-oldGist	meaningfull	2 répétitions	r	s	r	176	606	176	gist015_2	1920 ms	R-gist	0	1	4			r	8	8	MF_N_oldGist_1920_2
1	0 immédiat	animal47	chevre	animal	New-oldGist	meaningfull	2 répétitions	r	s	r	246	699	246	gist047_2	1920 ms	R-gist	0	1	4			r	8	8	MF_N_oldGist_1920_2
1	0 immédiat	animal78	casoar	animal	New-oldGist	meaningfull	2 répétitions	r	s	r	596	332	596	gist078_2	1920 ms	R-gist	0	1	4			r	8	8	MF_N_oldGist_1920_2
1	0 immédiat	fuit/legumes isoles22	mais	fruits/legumes	New-oldGist	meaningfull	2 répétitions	r	s	r	211	400	211	gist422_3	1920 ms	R-gist	0	1	4			r	8	8	MF_N_oldGist_1920_2
1	0 immédiat	fuit/legumes isoles38	brocoli	fruits/legumes	New-oldGist	meaningfull	2 répétitions	r	s	r	249	1766	249	gist438_3	1920 ms	R-gist	0	1	3			r	8	8	MF_N_oldGist_1920_2
1	0 immédiat	fuit/legumes isoles57	pizza	fruits/legumes	New-oldGist	meaningfull	2 répétitions	r	s	r	427	2302	427	gist459_2	1920 ms	R-gist	0	1	4			r	8	8	MF_N_oldGist_1920_2
1	0 immédiat	objet isole1	balle	objet isole	New-oldGist	meaningfull	2 répétitions	r	s	r	133	398	133	gist151_2	1920 ms	R-gist	0	1	4			r	8	8	MF_N_oldGist_1920_2
1	0 immédiat	objet isole17	compa	objet isole	New-oldGist	meaningfull	2 répétitions	r	s	r	309	600	309	gist166_2	1920 ms	R-gist	0	1	4			r	8	8	MF_N_oldGist_1920_2
1	0 immédiat	paysage15	fond marin	paysage	New-oldGist	meaningfull	2 répétitions	r	s	r	189	400	189	gist115_2	1920 ms	R-gist	0	1	2			r	8	8	MF_N_oldGist_1920_2
1	0 immédiat	paysage25	route	paysage	New-oldGist	meaningfull	2 répétitions	r	s	r	256	431	256	gist125_7	1920 ms	R-gist	0	1	4			r	8	8	MF_N_oldGist_1920_2
1	0 immédiat	animal11	varan	animal	New	meaningfull	0 répétition	r	s	r	224	406	224	gist011_1		R-newgist	0	1	NA			r	8	8	MF_new
1	0 immédiat	animal12	punaise	animal	New	meaningfull	0 répétition	r	s	r	197	439	197	gist012_1		R-newgist	0	1	NA			r	8	8	MF_new
1	0 immédiat	animal14	libellule	animal	New	meaningfull	0 répétition	e	s	e	188	440	188	gist014_1		R-newgist	0	1	NA			e	7	7	MF_new
1	0 immédiat	animal19	orque	animal	New	meaningfull	0 répétition	r	s	r	2193	579	2193	gist019_1		R-newgist	0	1	NA			r	8	8	MF_new
1	0 immédiat	animal23	buffle	animal	New	meaningfull	0 répétition	r	s	r	103	354	103	gist023_1		R-newgist	0	1	NA			r	8	8	MF_new
1	0 immédiat	animal24	hippopotame	animal	New	meaningfull	0 répétition	r	s	r	466	444	466	gist024_1		R-newgist	0	1	NA			r	8	8	MF_new
1	0 immédiat	animal32	renard	animal	New	meaningfull	0 répétition	r	s	r	156	562	156	gist032_1		R-newgist	0	1	NA			r	8	8	MF_new
1	0 immédiat	animal34	lion	animal	New	meaningfull	0 répétition	r	s	r	323	602	323	gist034_4		R-newgist	0	1	NA			r	8	8	MF_new
1	0 immédiat	animal36	chat	animal	New	meaningfull	0 répétition	r	s	r	334	527	334	gist036_2		R-newgist	0	1	NA			r	8	8	MF_new
1	0 immédiat	animal46	leopard	animal	New	meaningfull	0 répétition	r	s	r	306	565	306	gist046_2		R-newgist	0	1	NA			r	8	8	MF_new
1	0 immédiat	animal120	blereau	animal	New	meaningfull	0 répétition	r	s	r	366	424	366	gist050_2		R-newgist	0	1	NA			r	8	8	MF_new
1	0 immédiat	animal55	singe	animal	New	meaningfull	0 répétition	r	s	r	266	524	266	gist055_1		R-newgist	0	1	NA			r	8	8	MF_new
1	0 immédiat	animal66	autruche	animal	New	meaningfull	0 répétition	r	s	r	165	479	165	gist066_1		R-newgist	0	1	NA			r	8	8	MF_new
1	0 immédiat	animal69	oiseau	animal	New	meaningfull	0 répétition	r	s	r	182	491	182	gist069_1		R-newgist	0	1	NA			r	8	8	MF_new
1	0 immédiat	animal71	oie	animal	New	meaningfull	0 répétition	r	s	r	311	671	311	gist071_1		R-newgist	0	1	NA			r	8	8	MF_new
1	0 immédiat	animal72	oiseau2	animal	New	meaningfull	0 répétition	e	s	e	874	1236	874	gist072_1		R-newgist	0	1	NA			e	7	7	MF_new
1	0 immédiat	fuit/legumes isoles11	kiwi	fruits/legumes	New	meaningfull	0 répétition	e	s	e	316	417	316	gist411_1		R-newgist	0	1	NA			e	7	7	MF_new
1	0 immédiat	fuit/legumes isoles13	citron vert	fruits/legumes	New	meaningfull	0 répétition	r	s	r	59	397	59	gist413_1		R-newgist	0	1	NA			r	8	8	MF_new
1	0 immédiat	fuit/legumes isoles15	amande	fruits/legumes	New	meaningfull	0 répétition	r	s	r	535	3001	535	gist415_2		R-newgist	0	1	NA			r	8	8	MF_new
1	0 immédiat	fuit/legumes isoles16	litchi	fruits/legumes	New	meaningfull	0 répétition	r	s	r	298	572	298	gist416_1		R-newgist	0	1	NA			r	8	8	MF_new
1	0 immédiat	fuit/legumes isoles17	melon	fruits/legumes	New	meaningfull	0 répétition	r	s	r	1467	473	1467	gist417_1		R-newgist	0	1	NA			r	8	8	MF_new
1	0 immédiat	fuit/legumes isoles20	courgette	fruits/legumes	New	meaningfull	0 répétition	r	s	r	178	526	178	gist420_1		R-newgist	0	1	NA			r	8	8	MF_new
1	0 immédiat	fuit/legumes isoles21	framboise	fruits/legumes	New	meaningfull	0 répétition	z	l	z	827	907	827	gist421_1		R-newgist	1		NA	z	3			3	MF_new
1	0 immédiat	fuit/legumes isoles23	gateau	fruits/legumes	New	meaningfull	0 répétition	r	s	r	394	947	394	gist423_2		R-newgist	0	1	NA			r	8	8	MF_new
1	0 immédiat	fuit/legumes isoles24	hotdog	fruits/legumes	New	meaningfull	0 répétition	r	s	r	194	410	194	gist424_2		R-newgist	0	1	NA			r	8	8	MF_new
1	0 immédiat	fuit/legumes isoles35	patate	fruits/legumes	New	meaningfull	0 répétition	r	s	r	161	1052	161	gist435_2		R-newgist	0	1	NA			r	8	8	MF_new
1	0 immédiat	fuit/legumes isoles44	noisette	fruits/legumes	New	meaningfull	0 répétition	r	s	r	33	629	33	gist444_2		R-newgist	0	1	NA			r	8	8	MF_new
1	0 immédiat	fuit/legumes isoles48	figue	fruits/legumes	New	meaningfull	0 répétition	r	s	r	209	462	209	gist448_3		R-newgist	0	1	NA			r	8	8	MF_new
1	0 immédiat	objet isole7	trombone	objet isole	New	meaningfull	0 répétition	e	s	e	561	2239	561	gist157_1		R-newgist	0	1	NA			e	7	7	MF_new
1	0 immédiat	objet isole9	fil	objet isole	New	meaningfull	0 répétition	r	s	r	575	903	575	gist158_1		R-newgist	0	1	NA			r	8	8	MF_new
1	0 immédiat	objet isole15	crayon	objet isole	New	meaningfull	0 répétition	r	s	r	253	1172	253	gist164_1		R-newgist	0	1	NA			r	8	8	MF_new
1	0 immédiat	objet isole27	pioche	objet isole	New	meaningfull	0 répétition	r	s	r	446	2472	446	gist176_1		R-newgist	0	1	NA			r	8	8	MF_new
1	0 immédiat	objet isole29	mèche	objet isole	New	meaningfull	0 répétition	r	s	r	338	467	338	gist178_1		R-newgist	0	1	NA			r	8	8	MF_new
1	0 immédiat	objet isole30	niveau	objet isole	New	meaningfull	0 répétition	r	s	r	301	378	301	gist179_1		R-newgist	0	1	NA			r	8	8	MF_new
1	0 immédiat	paysage5	coucher de soleil	paysage	New	meaningfull	0 répétition	r	s	r	179	480	179	gist105_1		R-newgist	0	1	NA			r	8	8	MF_new
1	0 immédiat	paysage7	foret	paysage	New	meaningfull	0 répétition	e	s	e	382	998	382	gist107_2		R-newgist	0	1	NA			e	7	7	MF_new
1	0 immédiat	paysage10	montagne	paysage	New	meaningfull	0 répétition	r	s	r	180	531	180	gist110_1		R-newgist	0	1	NA			r	8	8	MF_new
1	0 immédiat	paysage18	neige	paysage	New	meaningfull	0 répétition	e	l	e	616	1558	616	gist118_1		R-newgist	1		NA	e	2			2	MF_new
1	0 immédiat	paysage22	mer/montagne	paysage	New	meaningfull	0 répétition	r	s	r	346	737	346	gist122_1		R-newgist	0	1	NA			r	8	8	MF_new
1	0 immédiat	paysage26	desert	paysage	New	meaningfull	0 répétition	r	s	r	414	606	414	gist126_1		R-newgist	0	1	NA			r	8	8	MF_new
1	0 immédiat	meaningless091	meanigless	meanigless	New	meaningless	0 répétition	e	s	e	402	542	402	Image0007		New	0	1	4			e	7	7	ML_new
1	0 immédiat	meaningless109	meanigless	meanigless	New	meaningless	0 répétition	r	s	r	283	1205	283	Image0008		New	0	1	4			r	8	8	ML_new
1	0 immédiat	meaningless127	meanigless	meanigless	New	meaningless	0 répétition	r	s	r	184	580	184	Image0011		New	0	1	3			r	8	8	ML_new
1	0 immédiat	meaningless159	meanigless	meanigless	New	meaningless	0 répétition	z	l	z	255	1138	255	Image0016		New	1		4	z	3			3	ML_new
1	0 immédiat	meaningless145	meanigless	meanigless	New	meaningless	0 répétition	e	s	e	660	356	660	Image0069		New	0	1	4			e	7	7	ML_new
1	0 immédiat	meaningless092	meanigless	meanigless	New	meaningless	0 répétition	e	l	e	181	399	181	Image0084		New	1		4	e	2			2	ML_new
1	0 immédiat	meaningless110	meanigless	meanigless	New	meaningless	0 répétition	z	s	z	3143	3053	3143	Image0085		New	0	1	4			z	6	6	ML_new
1	0 immédiat	meaningless141	meanigless	meanigless	New	meaningless	0 répétition	z	s	z	266	579	266	Image0086		New	0	1	4			z	6	6	ML_new
1	0 immédiat	meaningless160	meanigless	meanigless	New	meaningless	0 répétition	e	l	e	346	1965	346	Image0089		New	1		4	e	2			2	ML_new
1	0 immédiat	meaningless146	meanigless	meanigless	New	meaningless	0 répétition	z	s	z	4320	2487	4320	Image0103		New	0	1	4			z	6	6	ML_new
1	0 immédiat	meaningless093	meanigless	meanigless	New	meaningless	0 répétition	e	s	e	765	699	765	Image0119		New	0	1	4			e	7	7	ML_new
1	0 immédiat	meaningless111	meanigless	meanigless	New	meaningless	0 répétition	e	s	e	490	680	490	Image0122		New	0	1	4			e	7	7	ML_new
1	0 immédiat	meaningless128	meanigless	meanigless	New	meaningless	0 répétition	e	l	e	1097	594	1097	Image0123		New	1		4	e	2			2	ML_new
1	0 immédiat	meaningless147	meanigless	meanigless	New	meaningless	0 répétition	r	s	r	231	444	231	Image0155		New	0	1	4			r	8	8	ML_new
1	0 immédiat	meaningless094	meanigless	meanigless	New	meaningless	0 répétition	e	l	e	475	883	475	Image0171		New	1		4	e	2			2	ML_new
1	0 immédiat	meaningless112	meanigless	meanigless	New	meaningless	0 répétition	z	s	z	320	692	320	Image0172		New	0	1	3			z	6	6	ML_new
1	0 immédiat	meaningless129	meanigless	meanigless	New	meaningless	0 répétition	e	l	e	232	721	232	Image0174		New	1		3	e	2			2	ML_new
1	0 immédiat	meaningless105	meanigless	meanigless	New	meaningless	0 répétition	e	s	e	167	813	167	Image0201		New	0	1	4			e	7	7	ML_new
1	0 immédiat	meaningless123	meanigless	meanigless	New	meaningless	0 répétition	r	s	r	703	494	703	Image0202		New	0	1	4			r	8	8	ML_new
1	0 immédiat	meaningless148	meanigless	meanigless	New	meaningless	0 répétition	r	s	r	195	597	195	Image0214		New	0	1	4			r	8	8	ML_new
1	0 immédiat	meaningless095	meanigless	meanigless	New	meaningless	0 répétition	e	s	e	331	486	331	Image0235		New	0	1	4			e	7	7	ML_new
1	0 immédiat	meaningless124	meanigless	meanigless	New	meaningless	0 répétition	z	l	z	112	2967	112	Image0239		New	1		4	z	3			3	ML_new
1	0 immédiat	meaningless130	meanigless	meanigless	New	meaningless	0 répétition	r	s	r	2259	1119	2259	Image0240		New	0	1	2			r	8	8	ML_new
1	0 immédiat	meaningless149	meanigless	meanigless	New	meaningless	0 répétition	r	s	r	631	499	631	Image0340		New	0	1	4			r	8	8	ML_new
1	0 immédiat	meaningless087	meanigless	meanigless	New	meaningless	0 répétition	r	s	r	221	572	221	Image0381		New	0	1	4			r	8	8	ML_new
1	0 immédiat	meaningless096	meanigless	meanigless	New	meaningless	0 répétition	e	s	e	154	608	154	Image0386		New	0	1	4			e	7	7	ML_new
1	0 immédiat	meaningless113	meanigless	meanigless	New	meaningless	0 répétition	e	s	e	555	1106	555	Image0402		New	0	1	4			e	7	7	ML_new
1	0 immédiat	meaningless131	meanigless	meanigless	New	meaningless	0 répétition	e	s	e	160	1930	160	Image0403		New	0	1	4			e	7	7	ML_new
1	0 immédiat	meaningless097	meanigless	meanigless	New	meaningless	0 répétition	z	s	z	178	1378	178	Image0456		New	0	1	3			z	6	6	ML_new
1	0 immédiat	meaningless114	meanigless	meanigless	New	meaningless	0 répétition	e	l	e	99	368	99	Image0457		New	1		4	e	2			2	ML_new
1	0 immédiat	meaningless132	meanigless	meanigless	New	meaningless	0 répétition	e	l	e	171	577	171	Image0458		New	1		4	e	2			2	ML_new
1	0 immédiat	meaningless150	meanigless	meanigless	New	meaningless	0 répétition	r	s	r	179	638	179	Image0476		New	0	1	4			r	8	8	ML_new
1	0 immédiat	meaningless098	meanigless	meanigless	New	meaningless	0 répétition	e	s	e	277	505	277	Image0486		New	0	1	4			e	7	7	ML_new
1	0 immédiat	meaningless115	meanigless	meanigless	New	meaningless	0 répétition	r	s	r	605	864	605	Image0487		New	0	1	4			r	8	8	ML_new
1	0 immédiat	meaningless133	meanigless	meanigless	New	meaningless	0 répétition	e	s	e	332	734	332	Image0488		New	0	1	4			e	7	7	ML_new
1	0 immédiat	meaningless151	meanigless	meanigless	New	meaningless	0 répétition	e	s	e	210	656	210	Image0609		New	0	1	3			e	7	7	ML_new
1	0 immédiat	meaningless099	meanigless	meanigless	New	meaningless	0 répétition	z	s	z	538	1260	538	Image0617		New	0	1	4			z	6	6	ML_new
1	0 immédiat	meaningless116	meanigless	meanigless	New	meaningless	0 répétition	e	s	e	3710	571	3710	Image0618		New	0	1	3			e	7	7	ML_new
1	0 immédiat	meaningless134	meanigless	meanigless	New	meaningless	0 répétition	z	s	z	217	554	217	Image0619		New	0	1	4			z	6	6	ML_new
1	0 immédiat	meaningless088	meanigless	meanigless	New	meaningless	0 répétition	z	s	z	974	2491	974	Image0630		New	0	1	4			z	6	6	ML_new
1	0 immédiat	meaningless152	meanigless	meanigless	New	meaningless	0 répétition	r	s	r	121	378	121	Image0635		New	0	1	3			r	8	8	ML_new
1	0 immédiat	meaningless081	meanigless	meanigless	New	meaningless	0 répétition	e	l	e	308	839	308	Image0643		New	1		4	e	2			2	ML_new
1	0 immédiat	meaningless100	meanigless	meanigless	New	meaningless	0 répétition	e	s	e	171	379	171	Image0644		New	0	1	4			e	7	7	ML_new
1	0 immédiat	meaningless117	meanigless	meanigless	New	meaningless	0 répétition	e	s	e	306	479	306	Image0645		New	0	1	2			e	7	7	ML_new
1	0 immédiat	meaningless135	meanigless	meanigless	New	meaningless	0 répétition	e	s	e	203	459	203	Image0646		New	0	1	3			e	7	7	ML_new
1	0 immédiat	meaningless153	meanigless	meanigless	New	meaningless	0 répétition	r	s	r	234	531	234	Image0664		New	0	1	3			r	8	8	ML_new
1	0 immédiat	meaningless082	meanigless	meanigless	New	meaningless	0 répétition	r	s	r	267	1332	267	Image0671		New	0	1	2			r	8	8	ML_new
1	0 immédiat	meaningless101	meanigless	meanigless	New	meaningless	0 répétition	r	s	r	234	864	234	Image0672		New	0	1	2			r	8	8	ML_new
1	0 immédiat	meaningless118	meanigless	meanigless	New	meaningless	0 répétition	e	s	e	347	579	347	Image0673		New	0	1	3			e	7	7	ML_new
1	0 immédiat	meaningless136	meanigless	meanigless	New	meaningless	0 répétition	r	s	r	177	413	177	Image0674		New	0	1	2			r	8	8	ML_new
1	0 immédiat	meaningless154	meanigless	meanigless	New	meaningless	0 répétition	z	s	z	588	430	588	Image0691		New	0	1	3			z	6	6	ML_new
1	0 immédiat	meaningless083	meanigless	meanigless	New	meaningless	0 répétition	r	s	r	20	373	20	Image0698		New	0	1	3			r	8	8	ML_new
1	0 immédiat	meaningless102	meanigless	meanigless	New	meaningless	0 répétition	e	s	e	1511	642	1511	Image0701		New	0	1	3			e	7	7	ML_new
1	0 immédiat	meaningless119	meanigless	meanigless	New	meaningless	0 répétition	r	s	r	233	447	233	Image0702		New	0	1	4			r	8	8	ML_new
1	0 immédiat	meaningless137	meanigless	meanigless	New	meaningless	0 répétition	e	s	e	891	402	891	Image0704		New	0	1	3			e	7	7	ML_new
1	0 immédiat	meaningless155	meanigless	meanigless	New	meaningless	0 répétition	r	s	r	268	601	268	Image0896		New	0	1	2			r	8	8	ML_new
1	0 immédiat	meaningless084	meanigless	meanigless	New	meaningless	0 répétition	e	s	e	21	577	21	Image0932		New	0	1	3			e	7	7	ML_new
1	0 immédiat	meaningless103	meanigless	meanigless	New	meaningless	0 répétition	z	s	z	282	1335	282	Image0933		New	0	1	3			z	6	6	ML_new
1	0 immédiat	meaningless120	meanigless	meanigless	New	meaningless	0 répétition	r	s	r	279	823	279	Image1001		New	0	1	4			r	8	8	ML_new
1	0 immédiat	meaningless138	meanigless	meanigless	New	meaningless	0 répétition	z	l	z	1401	583	1401	Image1101		New	1		4	z	3			3	ML_new
1	0 immédiat	meaningless156	meanigless	meanigless	New	meaningless	0 répétition	e	s	e	236	401	236	Image1207		New	0	1	3			e	7	7	ML_new
1	0 immédiat	meaningless085	meanigless	meanigless	New	meaningless	0 répétition	e	s	e	162	322	162	Image1215		New	0	1	2			e	7	7	ML_new
1	0 immédiat	meaningless106	meanigless	meanigless	New	meaningless	0 répétition	e	s	e	3987	1283	3987	Image1216		New	0	1	4			e	7	7	ML_new
1	0 immédiat	meaningless121	meanigless	meanigless	New	meaningless	0 répétition	e	s	e	170	684	170	Image1217		New	0	1	4			e	7	7	ML_new
1	0 immédiat	meaningless139	meanigless	meanigless	New	meaningless	0 répétition	e	s	e	291	509	291	Image1218		New	0	1	4			e	7	7	ML_new
1	0 immédiat	meaningless142	meanigless	meanigless	New	meaningless	0 répétition	e	s	e	1403	596	1403	Image1232		New	0	1	3			e	7	7	ML_new
1	0 immédiat	meaningless157	meanigless	meanigless	New	meaningless	0 répétition	e	s	e	193	518	193	Image1234		New	0	1	3			e	7	7	ML_new
1	0 immédiat	meaningless086	meanigless	meanigless	New	meaningless	0 répétition	z	s	z	548	1847	548	Image1245		New	0	1	3			z	6	6	ML_new
1	0 immédiat	meaningless104	meanigless	meanigless	New	meaningless	0 répétition	r	s	r	5480	1640	5480	Image1246		New	0	1	2			r	8	8	ML_new
1	0 immédiat	meaningless122	meanigless	meanigless	New	meaningless	0 répétition	e	s	e	208	2052	208	Image1247		New	0	1	3			e	7	7	ML_new
1	0 immédiat	meaningless140	meanigless	meanigless	New	meaningless	0 répétition	e	s	e	3132	71	3132	Image1250		New	0	1	3			e	7	7	ML_new
1	0 immédiat	meaningless158	meanigless	meanigless	New	meaningless	0 répétition	e	s	e	121	321	121	Image1273		New	0	1	4			e	7	7	ML_new
1	0 immédiat	meaningless089	meanigless	meanigless	New	meaningless	0 répétition	e	s	e	370	882	370	R17		New	0	1	3			e	7	7	ML_new
1	0 immédiat	meaningless107	meanigless	meanigless	New	meaningless	0 répétition	e	s	e	448	1678	448	R18		New	0	1	4			e	7	7	ML_new
1	0 immédiat	meaningless125	meanigless	meanigless	New	meaningless	0 répétition	r	s	r	310	411	310	R19		New	0	1	3			r	8	8	ML_new
1	0 immédiat	meaningless143	meanigless	meanigless	New	meaningless	0 répétition	r	s	r	13	321	13	R20		New	0	1	3			r	8	8	ML_new
1	0 immédiat	meaningless090	meanigless	meanigless	New	meaningless	0 répétition	e	s	e	554	3147	554	R5		New	0	1	2			e	7	7	ML_new
1	0 immédiat	meaningless108	meanigless	meanigless	New	meaningless	0 répétition	z	s	z	1270	4076	1270	R6		New	0	1	3			z	6	6	ML_new
1	0 immédiat	meaningless126	meanigless	meanigless	New	meaningless	0 répétition	e	l	e	0	702	0	R7		New	1		2	e	2			2	ML_new
1	0 immédiat	meaningless144	meanigless	meanigless	New	meaningless	0 répétition	e	s	e	221	792	221	R8		New	0	1	2			e	7	7	ML_new
1	0 immédiat	meaningless177	meanigless	meanigless	Old	meaningless	1 répétition	z	l	z	2075	5077	2075	Image0070	120 ms	Old	1		4	z	3			3	ML_old_120_1
1	0 immédiat	meaningless209	meanigless	meanigless	Old	meaningless	1 répétition	z	l	z	783	732	783	Image0071	120 ms	Old	1		2	z	3			3	ML_old_120_1
1	0 immédiat	meaningless161	meanigless	meanigless	Old	meaningless	1 répétition	r	l	r	218	625	218	Image0128	120 ms	Old	1		4	r	1			1	ML_old_120_1
1	0 immédiat	meaningless225	meanigless	meanigless	Old	meaningless	1 répétition	z	s	z	1183	920	1183	Image0132	120 ms	Old	0	1	Non3			z	6	6	ML_old_120_1
1	0 immédiat	meaningless193	meanigless	meanigless	Old	meaningless	1 répétition	e	s	e	553	535	553	Image0178	120 ms	Old	0	1	4			e	7	7	ML_old_120_1
1	0 immédiat	meaningless181	meanigless	meanigless	Old	meaningless	1 répétition	r	s	r	198	424	198	Image0344	120 ms	Old	0	1	4			r	8	8	ML_old_120_1
1	0 immédiat	meaningless213	meanigless	meanigless	Old	meaningless	1 répétition	e	s	e	403	740	403	Image0348	120 ms	Old	0	1	4			e	7	7	ML_old_120_1
1	0 immédiat	meaningless173	meanigless	meanigless	Old	meaningless	1 répétition	r	s	r	176	420	176	Image0425	120 ms	Old	0	1	4			r	8	8	ML_old_120_1
1	0 immédiat	meaningless237	meanigless	meanigless	Old	meaningless	1 répétition	e	l	e	245	542	245	Image0427	120 ms	Old	1		4	e	2			2	ML_old_120_1
1	0 immédiat	meaningless165	meanigless	meanigless	Old	meaningless	1 répétition	r	s	r	186	386	186	Image0461	120 ms	Old	0	1	3			r	8	8	ML_old_120_1
1	0 immédiat	meaningless229	meanigless	meanigless	Old	meaningless	1 répétition	r	l	r	16	400	16	Image0465	120 ms	Old	1		4	r	1			1	ML_old_120_1
1	0 immédiat	meaningless206	meanigless	meanigless	Old	meaningless	1 répétition	e	s	e	558	1523	558	Image0477	120 ms	Old	0	1	4			e	7	7	ML_old_120_1
1	0 immédiat	meaningless197	meanigless	meanigless	Old	meaningless	1 répétition	z	s	z	494	3134	494	Image0501	120 ms	Old	0	1	4			z	6	6	ML_old_120_1
1	0 immédiat	meaningless185	meanigless	meanigless	Old	meaningless	1 répétition	r	s	r	205	888	205	Image0665	120 ms	Old	0	1	4			r	8	8	ML_old_120_1
1	0 immédiat	meaningless217	meanigless	meanigless	Old	meaningless	1 répétition	e	l	e	247	661	247	Image0666	120 ms	Old	1		4	e	2			2	ML_old_120_1
1	0 immédiat	meaningless169	meanigless	meanigless	Old	meaningless	1 répétition	e	l	e	609	310	609	Image0676	120 ms	Old	1		4	e	2			2	ML_old_120_1
1	0 immédiat	meaningless233	meanigless	meanigless	Old	meaningless	1 répétition	z	s	z	203	1181	203	Image0785	120 ms	Old	0	1	4			z	6	6	ML_old_120_1
1	0 immédiat	meaningless202	meanigless	meanigless	Old	meaningless	1 répétition	r	l	r	381	361	381	Image1104	120 ms	Old	1		4	r	1			1	ML_old_120_1
1	0 immédiat	meaningless189	meanigless	meanigless	Old	meaningless	1 répétition	r	l	r	498	632	498	Image1235	120 ms	Old	1		4	r	1			1	ML_old_120_1
1	0 immédiat	meaningless221	meanigless	meanigless	Old	meaningless	1 répétition	e	l	e	206	1200	206	Image1236	120 ms	Old	1		a	e	2			2	ML_old_120_1
1	0 immédiat	meaningless191	meanigless	meanigless	Old	meaningless	2 répétitions	z	l	z	1508	2428	1508	Image0017	120 ms	Old	1		4	z	3			3	ML_old_120_2
1	0 immédiat	meaningless223	meanigless	meanigless	Old	meaningless	2 répétitions	z	s	z	385	1073	385	Image0018	120 ms	Old	0	1	4			z	6	6	ML_old_120_2
1	0 immédiat	meaningless179	meanigless	meanigless	Old	meaningless	2 répétitions	e	s	e	228	539	228	Image0157	120 ms	Old	0	1	4			e	7	7	ML_old_120_2
1	0 immédiat	meaningless211	meanigless	meanigless	Old	meaningless	2 répétitions	r	l	r	214	715	214	Image0162	120 ms	Old	1		4	r	1			1	ML_old_120_2
1	0 immédiat	meaningless163	meanigless	meanigless	Old	meaningless	2 répétitions	e	s	e	1099	453	1099	Image0242	120 ms	Old	0	1	4			e	7	7	ML_old_120_2
1	0 immédiat	meaningless227	meanigless	meanigless	Old	meaningless	2 répétitions	e	s	e	88	466	88	Image0246	120 ms	Old	0	1	4			e	7	7	ML_old_120_2
1	0 immédiat	meaningless195	meanigless	meanigless	Old	meaningless	2 répétitions	r	s	r	155	486	155	Image0412	120 ms	Old	0	1	4			r	8	8	ML_old_120_2
1	0 immédiat	meaningless183	meanigless	meanigless	Old	meaningless	2 répétitions	r	s	r	416	816	416	Image0610	120 ms	Old	0	1	4			r	8	8	ML_old_120_2
1	0 immédiat	meaningless215	meanigless	meanigless	Old	meaningless	2 répétitions	r	l	r	115	361	115	Image0611	120 ms	Old	1		4	r	1			1	ML_old_120_2
1	0 immédiat	meaningless167	meanigless	meanigless	Old	meaningless	2 répétitions	r	s	r	1152	850	1152	Image0621	120 ms	Old	0	1	4			r	8	8	ML_old_120_2
1	0 immédiat	meaningless231	meanigless	meanigless	Old	meaningless	2 répétitions	r	l	r	11	297	11	Image0623	120 ms	Old	1		3	r	1			1	ML_old_120_2
1	0 immédiat	meaningless199	meanigless	meanigless	Old	meaningless	2 répétitions	r	l	r	158	356	158	Image0651	120 ms	Old	1		4	r	1			1	ML_old_120_2
1	0 immédiat	meaningless187	meanigless	meanigless	Old	meaningless	2 répétitions	r	s	r	255	539	255	Image0897	120 ms	Old	0	1	4			r	8	8	ML_old_120_2
1	0 immédiat	meaningless219	meanigless	meanigless	Old	meaningless	2 répétitions	z	l	z	250	420	250	Image0916	120 ms	Old	1		4	z	3			3	ML_old_120_2
1	0 immédiat	meaningless171	meanigless	meanigless	Old	meaningless	2 répétitions	e	l	e	205	454	205	Image1103	120 ms	Old	1		4	e	2			2	ML_old_120_2
1	0 immédiat	meaningless235	meanigless	meanigless	Old	meaningless	2 répétitions	e	s	e	261	942	261	Image1222	120 ms	Old	0	1	4			e	7	7	ML_old_120_2
1	0 immédiat	meaningless204	meanigless	meanigless	Old	meaningless	2 répétitions	e	l	e	272	711	272	Image1253	120 ms	Old	1		a	e	2			2	ML_old_120_2
1	0 immédiat	meaningless175	meanigless	meanigless	Old	meaningless	2 répétitions	e	s	e	144	479	144	R10	120 ms	Old	0	1	4			e	7	7	ML_old_120_2
1	0 immédiat	meaningless239	meanigless	meanigless	Old	meaningless	2 répétitions	r	l	r	173	513	173	R12	120 ms	Old	1		4	r	1			1	ML_old_120_2
1	0 immédiat	meaningless208	meanigless	meanigless	Old	meaningless	2 répétitions	e	l	e	226	3083	226	R23	120 ms	Old	1		a	e	2			2	ML_old_120_2
1	0 immédiat	meaningless178	meanigless	meanigless	Old	meaningless	1 répétition	r	l	r	117	369	117	Image0107	1920 ms	Old	1		a	r	1			1	ML_old_1920_1
1	0 immédiat	meaningless210	meanigless	meanigless	Old	meaningless	1 répétition	r	s	r	1003	1759	1003	Image0108	1920 ms	Old	0	1	2			r	8	8	ML_old_1920_1
1	0 immédiat	meaningless205	meanigless	meanigless	Old	meaningless	1 répétition	e	l	e	222	510	222	Image0129	1920 ms	Old	1		4	e	2			2	ML_old_1920_1
1	0 immédiat	meaningless162	meanigless	meanigless	Old	meaningless	1 répétition	e	l	e	109	325	109	Image0176	1920 ms	Old	1		2	e	2			2	ML_old_1920_1
1	0 immédiat	meaningless226	meanigless	meanigless	Old	meaningless	1 répétition	e	l	e	306	441	306	Image0179	1920 ms	Old	1		4	e	2			2	ML_old_1920_1
1	0 immédiat	meaningless194	meanigless	meanigless	Old	meaningless	1 répétition	r	l	r	203	466	203	Image0243	1920 ms	Old	1		a	r	1			1	ML_old_1920_1
1	0 immédiat	meaningless182	meanigless	meanigless	Old	meaningless	1 répétition	e	s	e	172	565	172	Image0426	1920 ms	Old	0	1	4			e	7	7	ML_old_1920_1
1	0 immédiat	meaningless214	meanigless	meanigless	Old	meaningless	1 répétition	r	l	r	189	331	189	Image0478	1920 ms	Old	1		3	r	1			1	ML_old_1920_1
1	0 immédiat	meaningless166	meanigless	meanigless	Old	meaningless	1 répétition	e	s	e	577	2169	577	Image0494	1920 ms	Old	0	1	a			e	7	7	ML_old_1920_1
1	0 immédiat	meaningless230	meanigless	meanigless	Old	meaningless	1 répétition	e	l	e	137	369	137	Image0542	1920 ms	Old	1		4	e	2			2	ML_old_1920_1
1	0 immédiat	meaningless198	meanigless	meanigless	Old	meaningless	1 répétition	z	l	z	247	3820	247	Image0622	1920 ms	Old	1		2	z	3			3	ML_old_1920_1
1	0 immédiat	meaningless238	meanigless	meanigless	Old	meaningless	1 répétition	e	l	e	159	442	159	Image0680	1920 ms	Old	1		4	e	2			2	ML_old_1920_1
1	0 immédiat	meaningless186	meanigless	meanigless	Old	meaningless	1 répétition	r	l	r	288	584	288	Image0692	1920 ms	Old	1		4	r	1			1	ML_old_1920_1
1	0 immédiat	meaningless218	meanigless	meanigless	Old	meaningless	1 répétition	r	l	r	96	388	96	Image0693	1920 ms	Old	1		4	r	1			1	ML_old_1920_1
1	0 immédiat	meaningless170	meanigless	meanigless	Old	meaningless	1 répétition	r	l	r	345	493	345	Image0760	1920 ms	Old	1		4	r	1			1	ML_old_1920_1
1	0 immédiat	meaningless201	meanigless	meanigless	Old	meaningless	1 répétition	r	l	r	278	464	278	Image0764	1920 ms	Old	1		Non3	r	1			1	ML_old_1920_1
1	0 immédiat	meaningless234	meanigless	meanigless	Old	meaningless	1 répétition	r	l	r	145	356	145	Image1105	1920 ms	Old	1		4	r	1			1	ML_old_1920_1
1	0 immédiat	meaningless174	meanigless	meanigless	Old	meaningless	1 répétition	r	l	r	241	518	241	Image1252	1920 ms	Old	1		3	r	1			1	ML_old_1920_1
1	0 immédiat	meaningless190	meanigless	meanigless	Old	meaningless	1 répétition	r	l	r	265	429	265	Image1274	1920 ms	Old	1		2	r	1			1	ML_old_1920_1
1	0 immédiat	meaningless222	meanigless	meanigless	Old	meaningless	1 répétition	e	l	e	88	309	88	Image1277	1920 ms	Old	1		4	e	2			2	ML_old_1920_1
1	0 immédiat	meaningless192	meanigless	meanigless	Old	meaningless	2 répétitions	r	l	r	283	338	283	Image0090	1920 ms	Old	1		4	r	1			1	ML_old_1920_2
1	0 immédiat	meaningless224	meanigless	meanigless	Old	meaningless	2 répétitions	r	l	r	167	392	167	Image0091	1920 ms	Old	1		4	r	1			1	ML_old_1920_2
1	0 immédiat	meaningless180	meanigless	meanigless	Old	meaningless	2 répétitions	r	l	r	213	391	213	Image0215	1920 ms	Old	1		3	r	1			1	ML_old_1920_2
1	0 immédiat	meaningless212	meanigless	meanigless	Old	meaningless	2 répétitions	r	l	r	323	612	323	Image0220	1920 ms	Old	1		4	r	1			1	ML_old_1920_2
1	0 immédiat	meaningless164	meanigless	meanigless	Old	meaningless	2 répétitions	r	l	r	360	434	360	Image0411	1920 ms	Old	1		4	r	1			1	ML_old_1920_2
1	0 immédiat	meaningless228	meanigless	meanigless	Old	meaningless	2 répétitions	r	l	r	253	310	253	Image0413	1920 ms	Old	1		4	r	1			1	ML_old_1920_2
1	0 immédiat	meaningless196	meanigless	meanigless	Old	meaningless	2 répétitions	r	l	r	185	645	185	Image0462	1920 ms	Old	1		4	r	1			1	ML_old_1920_2
1	0 immédiat	meaningless184	meanigless	meanigless	Old	meaningless	2 répétitions	r	l	r	231	378	231	Image0636	1920 ms	Old	1		4	r	1			1	ML_old_1920_2
1	0 immédiat	meaningless216	meanigless	meanigless	Old	meaningless	2 répétitions	e	l	e	317	954	317	Image0637	1920 ms	Old	1		4	e	2			2	ML_old_1920_2
1	0 immédiat	meaningless168	meanigless	meanigless	Old	meaningless	2 répétitions	e	l	e	154	381	154	Image0649	1920 ms	Old	1		4	e	2			2	ML_old_1920_2
1	0 immédiat	meaningless232	meanigless	meanigless	Old	meaningless	2 répétitions	r	l	r	150	356	150	Image0652	1920 ms	Old	1		4	r	1			1	ML_old_1920_2
1	0 immédiat	meaningless200	meanigless	meanigless	Old	meaningless	2 répétitions	r	l	r	264	425	264	Image0677	1920 ms	Old	1		4	r	1			1	ML_old_1920_2
1	0 immédiat	meaningless188	meanigless	meanigless	Old	meaningless	2 répétitions	r	l	r	146	575	146	Image1208	1920 ms	Old	1		4	r	1			1	ML_old_1920_2
1	0 immédiat	meaningless220	meanigless	meanigless	Old	meaningless	2 répétitions	r	l	r	33	278	33	Image1209	1920 ms	Old	1		4	r	1			1	ML_old_1920_2
1	0 immédiat	meaningless172	meanigless	meanigless	Old	meaningless	2 répétitions	r	l	r	194	383	194	Image1220	1920 ms	Old	1		a	r	1			1	ML_old_1920_2
1	0 immédiat	meaningless203	meanigless	meanigless	Old	meaningless	2 répétitions	r	l	r	268	520	268	Image1221	1920 ms	Old	1		3	r	1			1	ML_old_1920_2
1	0 immédiat	meaningless236	meanigless	meanigless	Old	meaningless	2 répétitions	r	l	r	400	509	400	Image1254	1920 ms	Old	1		2	r	1			1	ML_old_1920_2
1	0 immédiat	meaningless207	meanigless	meanigless	Old	meaningless	2 répétitions	r	l	r	321	561	321	R11	1920 ms	Old	1		4	r	1			1	ML_old_1920_2
1	0 immédiat	meaningless176	meanigless	meanigless	Old	meaningless	2 répétitions	r	l	r	147	362	147	R22	1920 ms	Old	1		4	r	1			1	ML_old_1920_2
1	0 immédiat	meaningless240	meanigless	meanigless	Old	meaningless	2 répétitions	r	l	r	233	573	233	R24	1920 ms	Old	1		4	r	1			1	ML_old_1920_2
2	0 immédiat	animal5	papillon	animal	Old	meaningfull	1 répétition	Z	L	Z	3364	466	3364	gist005_1	120 ms	Old	1		4	Z	3			3	MF_old_120_1
2	0 immédiat	animal17	dauphin	animal	Old	meaningfull	1 répétition	R	L	R	397	753	397	gist017_2	120 ms	Old	1		4	R	1			1	MF_old_120_1
2	0 immédiat	animal26	ours	animal	Old	meaningfull	1 répétition	R	L	R	334	569	334	gist026_2	120 ms	Old	1		4	R	1			1	MF_old_120_1
2	0 immédiat	animal35	tigre	animal	Old	meaningfull	1 répétition	R	L	R	1684	613	1684	gist035_2	120 ms	Old	1		4	R	1			1	MF_old_120_1
2	0 immédiat	animal42	giraffe	animal	Old	meaningfull	1 répétition	R	L	R	306	578	306	gist042_3	120 ms	Old	1		4	R	1			1	MF_old_120_1
2	0 immédiat	animal52	bouc	animal	Old	meaningfull	1 répétition	Z	L	Z	662	25	662	gist052_2	120 ms	Old	1		4	Z	3			3	MF_old_120_1
2	0 immédiat	animal60	panthère noire	animal	Old	meaningfull	1 répétition	R	L	R	304	483	304	gist060_2	120 ms	Old	1		4	R	1			1	MF_old_120_1
2	0 immédiat	animal79	cigogne	animal	Old	meaningfull	1 répétition	R	L	R	254	355	254	gist079_1	120 ms	Old	1		4	R	1			1	MF_old_120_1
2	0 immédiat	fuit/legumes isoles9	pasteque	fruits/legumes	Old	meaningfull	1 répétition	R	L	R	258	738	258	gist409_1	120 ms	Old	1		4	R	1			1	MF_old_120_1
2	0 immédiat	fuit/legumes isoles30	choux	fruits/legumes	Old	meaningfull	1 répétition	R	L	R	468	581	468	gist430_2	120 ms	Old	1		4	R	1			1	MF_old_120_1
2	0 immédiat	fuit/legumes isoles36	paplemousse	fruits/legumes	Old	meaningfull	1 répétition	R	L	R	336	353	336	gist436_2	120 ms	Old	1		3	R	1			1	MF_old_120_1
2	0 immédiat	fuit/legumes isoles45	haricot	fruits/legumes	Old	meaningfull	1 répétition	E	L	E	368	5713	368	gist446_2	120 ms	Old	1		4	E	2			2	MF_old_120_1
2	0 immédiat	fuit/legumes isoles56	poivron	fruits/legumes	Old	meaningfull	1 répétition	R	L	R	399	587	399	gist457_1	120 ms	Old	1		4	R	1			1	MF_old_120_1
2	0 immédiat	objet isole5	eponde	objet isole	Old	meaningfull	1 répétition	R	L	R	454	516	454	gist155_1	120 ms	Old	1		4	R	1			1	MF_old_120_1
2	0 immédiat	objet isole13	ciseau	objet isole	Old	meaningfull	1 répétition	R	L	R	293	747	293	gist162_1	120 ms	Old	1		4	R	1			1	MF_old_120_1
2	0 immédiat	objet isole23	des	objet isole	Old	meaningfull	1 répétition	R	L	R	350	468	350	gist172_1	120 ms	Old	1		4	R	1			1	MF_old_120_1
2	0 immédiat	objet isole31	spatule	objet isole	Old	meaningfull	1 répétition	R	S	R	889	1482	889	gist180_1	120 ms	Old	0	1	4			R	8	8	MF_old_120_1
2	0 immédiat	paysage7	foret	paysage	Old	meaningfull	1 répétition	R	S	R	351	458	351	gist107_1	120 ms	Old	0	1	4			R	8	8	MF_old_120_1
2	0 immédiat	paysage19	champ	paysage	Old	meaningfull	1 répétition	A	S	A	1494	1473	1494	gist119_1	120 ms	Old	0	1	4			A	5	5	MF_old_120_1
2	0 immédiat	paysage25	route	paysage	Old	meaningfull	1 répétition	E	L	E	304	1517	304	gist125_4	120 ms	Old	1		4	E	2			2	MF_old_120_1
2	0 immédiat	animal8	tortue	animal	Old	meaningfull	2 répétitions	R	L	R	1145	1139	1145	gist008_1	120 ms	Old	1		2	R	1			1	MF_old_120_2
2	0 immédiat	animal21	rinoceroce	animal	Old	meaningfull	2 répétitions	R	L	R	330	655	330	gist021_1	120 ms	Old	1		4	R	1			1	MF_old_120_2
2	0 immédiat	animal31	loup	animal	Old	meaningfull	2 répétitions	R	S	R	322	1511	322	gist031_1	120 ms	Old	0	1	4			R	8	8	MF_old_120_2
2	0 immédiat	animal40	cerf	animal	Old	meaningfull	2 répétitions	E	L	E	230	581	230	gist040_2	120 ms	Old	1		4	E	2			2	MF_old_120_2
2	0 immédiat	animal45	kangourou	animal	Old	meaningfull	2 répétitions	R	L	R	732	782	732	gist045_1	120 ms	Old	1		4	R	1			1	MF_old_120_2
2	0 immédiat	animal54	mouton	animal	Old	meaningfull	2 répétitions	R	L	R	247	1439	247	gist054_1	120 ms	Old	1		2	R	1			1	MF_old_120_2
2	0 immédiat	animal67	pinguin	animal	Old	meaningfull	2 répétitions	R	L	R	393	435	393	gist067_1	120 ms	Old	1		4	R	1			1	MF_old_120_2
2	0 immédiat	fuit/legumes isoles3	orange	fruits/legumes	Old	meaningfull	2 répétitions	R	L	R	330	407	330	gist403_2	120 ms	Old	1		4	R	1			1	MF_old_120_2
2	0 immédiat	fuit/legumes isoles19	tomate	fruits/legumes	Old	meaningfull	2 répétitions	R	L	R	294	1270	294	gist419_1	120 ms	Old	1		4	R	1			1	MF_old_120_2
2	0 immédiat	fuit/legumes isoles33	myrtille	fruits/legumes	Old	meaningfull	2 répétitions	R	L	R	228	531	228	gist433_2	120 ms	Old	1		4	R	1			1	MF_old_120_2
2	0 immédiat	fuit/legumes isoles40	jambon	fruits/legumes	Old	meaningfull	2 répétitions	R	L	R	377	861	377	gist440_2	120 ms	Old	1		4	R	1			1	MF_old_120_2
2	0 immédiat	fuit/legumes isoles51	blette	fruits/legumes	Old	meaningfull	2 répétitions	R	L	R	455	590	455	gist451_2	120 ms	Old	1		4	R	1			1	MF_old_120_2
2	0 immédiat	fuit/legumes isoles59	radis	fruits/legumes	Old	meaningfull	2 répétitions	R	L	R	348	2186	348	gist461_1	120 ms	Old	1		2	R	1			1	MF_old_120_2
2	0 immédiat	objet isole3	brosse à dent	objet isole	Old	meaningfull	2 répétitions	R	L	R	414	780	414	gist153_1	120 ms	Old	1		4	R	1			1	MF_old_120_2
2	0 immédiat	objet isole11	toune_visse	objet isole	Old	meaningfull	2 répétitions	R	L	R	1307	578	1307	gist160_1	120 ms	Old	1		4	R	1			1	MF_old_120_2
2	0 immédiat	objet isole16	couverts	objet isole	Old	meaningfull	2 répétitions	R	L	R	556	430	556	gist165_1	120 ms	Old	1		4	R	1			1	MF_old_120_2
2	0 immédiat	objet isole26	scie	objet isole	Old	meaningfull	2 répétitions	R	L	R	345	539	345	gist175_1	120 ms	Old	1		4	R	1			1	MF_old_120_2
2	0 immédiat	paysage2	plage	paysage	Old	meaningfull	2 répétitions	R	L	R	308	744	308	gist102_1	120 ms	Old	1		4	R	1			1	MF_old_120_2
2	0 immédiat	paysage13	desert:steppe	paysage	Old	meaningfull	2 répétitions	R	L	R	526	884	526	gist113_2	120 ms	Old	1		4	R	1			1	MF_old_120_2
2	0 immédiat	paysage25	route	paysage	Old	meaningfull	2 répétitions	A	L	A	1331	3415	1331	gist125_1	120 ms	Old	1		3	A	4			4	MF_old_120_2
2	0 immédiat	animal6	grenouille	animal	Old	meaningfull	1 répétition	R	L	R	399	709	399	gist006_1	1920 ms	Old	1		4	R	1			1	MF_old_1920_1
2	0 immédiat	animal18	ours polaire	animal	Old	meaningfull	1 répétition	R	L	R	371	380	371	gist018_2	1920 ms	Old	1		4	R	1			1	MF_old_1920_1
2	0 immédiat	animal30	chien	animal	Old	meaningfull	1 répétition	R	L	R	536	505	536	gist030_1	1920 ms	Old	1		4	R	1			1	MF_old_1920_1
2	0 immédiat	animal38	zebre	animal	Old	meaningfull	1 répétition	R	L	R	893	410	893	gist038_1	1920 ms	Old	1		4	R	1			1	MF_old_1920_1
2	0 immédiat	animal44	vache	animal	Old	meaningfull	1 répétition	R	L	R	403	329	403	gist044_2	1920 ms	Old	1		a	R	1			1	MF_old_1920_1
2	0 immédiat	animal53	bison	animal	Old	meaningfull	1 répétition	R	L	R	423	656	423	gist053_1	1920 ms	Old	1		4	R	1			1	MF_old_1920_1
2	0 immédiat	animal62	ane	animal	Old	meaningfull	1 répétition	R	L	R	330	457	330	gist062_1	1920 ms	Old	1		4	R	1			1	MF_old_1920_1
2	0 immédiat	animal80	coq	animal	Old	meaningfull	1 répétition	R	L	R	417	444	417	gist080_1	1920 ms	Old	1		4	R	1			1	MF_old_1920_1
2	0 immédiat	fuit/legumes isoles1	pomme	fruits/legumes	Old	meaningfull	1 répétition	R	L	R	353	386	353	gist401_1	1920 ms	Old	1		4	R	1			1	MF_old_1920_1
2	0 immédiat	fuit/legumes isoles18	champignion	fruits/legumes	Old	meaningfull	1 répétition	R	L	R	311	472	311	gist418_2	1920 ms	Old	1		4	R	1			1	MF_old_1920_1
2	0 immédiat	fuit/legumes isoles32	cacahouette	fruits/legumes	Old	meaningfull	1 répétition	R	L	R	433	425	433	gist432_2	1920 ms	Old	1		4	R	1			1	MF_old_1920_1
2	0 immédiat	fuit/legumes isoles39	poulet	fruits/legumes	Old	meaningfull	1 répétition	Z	L	Z	288	863	288	gist439_2	1920 ms	Old	1		4	Z	3			3	MF_old_1920_1
2	0 immédiat	fuit/legumes isoles47	avocat	fruits/legumes	Old	meaningfull	1 répétition	R	L	R	400	1533	400	gist448_1	1920 ms	Old	1		4	R	1			1	MF_old_1920_1
2	0 immédiat	fuit/legumes isoles58	croissant	fruits/legumes	Old	meaningfull	1 répétition	R	L	R	427	720	427	gist460_1	1920 ms	Old	1		4	R	1			1	MF_old_1920_1
2	0 immédiat	objet isole4	peigne	objet isole	Old	meaningfull	1 répétition	R	L	R	359	1291	359	gist154_1	1920 ms	Old	1		4	R	1			1	MF_old_1920_1
2	0 immédiat	objet isole14	pince à linge	objet isole	Old	meaningfull	1 répétition	R	L	R	523	1983	523	gist163_1	1920 ms	Old	1		4	R	1			1	MF_old_1920_1
2	0 immédiat	objet isole24	pince	objet isole	Old	meaningfull	1 répétition	R	L	R	311	422	311	gist173_1	1920 ms	Old	1		4	R	1			1	MF_old_1920_1
2	0 immédiat	paysage11	montagne	paysage	Old	meaningfull	1 répétition	R	L	R	418	398	418	gist111_1	1920 ms	Old	1		4	R	1			1	MF_old_1920_1
2	0 immédiat	paysage20	champ	paysage	Old	meaningfull	1 répétition	R	L	R	318	452	318	gist120_1	1920 ms	Old	1		4	R	1			1	MF_old_1920_1
2	0 immédiat	paysage25	route	paysage	Old	meaningfull	1 répétition	R	L	R	335	865	335	gist125_2	1920 ms	Old	1		4	R	1			1	MF_old_1920_1
2	0 immédiat	animal13	chenille	animal	Old	meaningfull	2 répétitions	R	L	R	382	811	382	gist013_2	1920 ms	Old	1		4	R	1			1	MF_old_1920_2
2	0 immédiat	animal22	elephant	animal	Old	meaningfull	2 répétitions	R	L	R	921	583	921	gist022_2	1920 ms	Old	1		a	R	1			1	MF_old_1920_2
2	0 immédiat	animal33	panthère	animal	Old	meaningfull	2 répétitions	R	L	R	489	624	489	gist033_1	1920 ms	Old	1		4	R	1			1	MF_old_1920_2
2	0 immédiat	animal41	oxyx	animal	Old	meaningfull	2 répétitions	R	L	R	710	630	710	gist041_2	1920 ms	Old	1		3	R	1			1	MF_old_1920_2
2	0 immédiat	animal48	ecureuil	animal	Old	meaningfull	2 répétitions	R	L	R	258	880	258	gist048_1	1920 ms	Old	1		4	R	1			1	MF_old_1920_2
2	0 immédiat	animal56	gorille	animal	Old	meaningfull	2 répétitions	R	L	R	5387	1384	5387	gist056_1	1920 ms	Old	1		4	R	1			1	MF_old_1920_2
2	0 immédiat	animal77	flaman rose	animal	Old	meaningfull	2 répétitions	R	L	R	449	713	449	gist077_1	1920 ms	Old	1		4	R	1			1	MF_old_1920_2
2	0 immédiat	fuit/legumes isoles5	raisin	fruits/legumes	Old	meaningfull	2 répétitions	R	L	R	269	310	269	gist405_1	1920 ms	Old	1		4	R	1			1	MF_old_1920_2
2	0 immédiat	fuit/legumes isoles28	cookies	fruits/legumes	Old	meaningfull	2 répétitions	R	L	R	342	412	342	gist428_2	1920 ms	Old	1		4	R	1			1	MF_old_1920_2
2	0 immédiat	fuit/legumes isoles34	mur	fruits/legumes	Old	meaningfull	2 répétitions	R	L	R	582	1409	582	gist434_2	1920 ms	Old	1		4	R	1			1	MF_old_1920_2
2	0 immédiat	fuit/legumes isoles43	cafe	fruits/legumes	Old	meaningfull	2 répétitions	R	L	R	441	863	441	gist443_2	1920 ms	Old	1		4	R	1			1	MF_old_1920_2
2	0 immédiat	fuit/legumes isoles52	datte	fruits/legumes	Old	meaningfull	2 répétitions	R	L	R	966	696	966	gist452_3	1920 ms	Old	1		4	R	1			1	MF_old_1920_2
2	0 immédiat	fuit/legumes isoles60	carotte	fruits/legumes	Old	meaningfull	2 répétitions	R	L	R	404	768	404	gist462_1	1920 ms	Old	1		4	R	1			1	MF_old_1920_2
2	0 immédiat	objet isole8	epingles nourisse	objet isole	Old	meaningfull	2 répétitions	R	L	R	2029	1380	2029	gist157_2	1920 ms	Old	1		4	R	1			1	MF_old_1920_2
2	0 immédiat	objet isole22	raquette	objet isole	Old	meaningfull	2 répétitions	R	L	R	564	671	564	gist171_1	1920 ms	Old	1		4	R	1			1	MF_old_1920_2
2	0 immédiat	objet isole28	cle	objet isole	Old	meaningfull	2 répétitions	R	L	R	252	432	252	gist177_1	1920 ms	Old	1		4	R	1			1	MF_old_1920_2
2	0 immédiat	paysage4	rocher	paysage	Old	meaningfull	2 répétitions	R	L	R	215	453	215	gist104_2	1920 ms	Old	1		4	R	1			1	MF_old_1920_2
2	0 immédiat	paysage16	champ de fleur	paysage	Old	meaningfull	2 répétitions	R	L	R	303	661	303	gist116_1	1920 ms	Old	1		4	R	1			1	MF_old_1920_2
2	0 immédiat	paysage25	route	paysage	Old	meaningfull	2 répétitions	R	L	R	348	572	348	gist125_10	1920 ms	Old	1		4	R	1			1	MF_old_1920_2
2	0 immédiat	paysage25	route	paysage	Old	meaningfull	2 répétitions	R	L	R	223	407	223	gist125_8	1920 ms	Old	1		a	R	1			1	MF_old_1920_2
2	0 immédiat	animal1	escargot	animal	New-oldGist	meaningfull	1 répétition	R	S	R	518	3473	518	gist001_2	120 ms	R-gist	0	1	3			R	8	8	MF_N_oldGist_120_1
2	0 immédiat	animal16	phoque	animal	New-oldGist	meaningfull	1 répétition	Z	L	Z	201	3274	201	gist016_2	120 ms	R-gist	1		4	Z	3			3	MF_N_oldGist_120_1
2	0 immédiat	animal68	cygne	animal	New-oldGist	meaningfull	1 répétition	A	S	A	395	546	395	gist068_2	120 ms	R-gist	0	1	4			A	5	5	MF_N_oldGist_120_1
2	0 immédiat	fuit/legumes isoles2	poire	fruits/legumes	New-oldGist	meaningfull	1 répétition	Z	S	Z	1549	2360	1549	gist402_1	120 ms	R-gist	0	1	2			Z	6	6	MF_N_oldGist_120_1
2	0 immédiat	fuit/legumes isoles26	fromage	fruits/legumes	New-oldGist	meaningfull	1 répétition	A	L	A	1673	1468	1673	gist426_2	120 ms	R-gist	1		3	A	4			4	MF_N_oldGist_120_1
2	0 immédiat	fuit/legumes isoles42	steak	fruits/legumes	New-oldGist	meaningfull	1 répétition	Z	S	Z	512	1030	512	gist442_2	120 ms	R-gist	0	1	3			Z	6	6	MF_N_oldGist_120_1
2	0 immédiat	objet isole2	brosse	objet isole	New-oldGist	meaningfull	1 répétition	R	S	R	302	792	302	gist152_2	120 ms	R-gist	0	1	4			R	8	8	MF_N_oldGist_120_1
2	0 immédiat	paysage1	ciel	paysage	New-oldGist	meaningfull	1 répétition	Z	L	Z	232	1750	232	gist101_2	120 ms	R-gist	1		2	Z	3			3	MF_N_oldGist_120_1
2	0 immédiat	paysage17	banquise	paysage	New-oldGist	meaningfull	1 répétition	R	S	R	722	3095	722	gist117_1	120 ms	R-gist	0	1	3			R	8	8	MF_N_oldGist_120_1
2	0 immédiat	paysage27	fougère	paysage	New-oldGist	meaningfull	1 répétition	Z	S	Z	559	227	559	gist127_2	120 ms	R-gist	0	1	4			Z	6	6	MF_N_oldGist_120_1
2	0 immédiat	animal4	champigon	animal	New-oldGist	meaningfull	2 répétitions	R	S	R	1942	1099	1942	gist004_1	120 ms	R-gist	0	1	4			R	8	8	MF_N_oldGist_120_2
2	0 immédiat	animal43	chameau	animal	New-oldGist	meaningfull	2 répétitions	R	S	R	333	627	333	gist043_2	120 ms	R-gist	0	1	4			R	8	8	MF_N_oldGist_120_2
2	0 immédiat	animal76	paon	animal	New-oldGist	meaningfull	2 répétitions	R	S	R	382	1297	382	gist076_2	120 ms	R-gist	0	1	3			R	8	8	MF_N_oldGist_120_2
2	0 immédiat	fuit/legumes isoles6	noix de coco	fruits/legumes	New-oldGist	meaningfull	2 répétitions	A	L	A	364	1741	364	gist406_1	120 ms	R-gist	1		4	A	4			4	MF_N_oldGist_120_2
2	0 immédiat	fuit/legumes isoles37	pêche	fruits/legumes	New-oldGist	meaningfull	2 répétitions	A	L	A	221	840	221	gist437_3	120 ms	R-gist	1		4	A	4			4	MF_N_oldGist_120_2
2	0 immédiat	fuit/legumes isoles49	kaki	fruits/legumes	New-oldGist	meaningfull	2 répétitions	E	S	E	312	854	312	gist449_2	120 ms	R-gist	0	1	4			E	7	7	MF_N_oldGist_120_2
2	0 immédiat	objet isole12	pinceau	objet isole	New-oldGist	meaningfull	2 répétitions	E	L	E	190	407	190	gist161_2	120 ms	R-gist	1		4	E	2			2	MF_N_oldGist_120_2
2	0 immédiat	paysage9	montagne eneige	paysage	New-oldGist	meaningfull	2 répétitions	R	L	R	218	428	218	gist109_2	120 ms	R-gist	1		4	R	1			1	MF_N_oldGist_120_2
2	0 immédiat	paysage25	route	paysage	New-oldGist	meaningfull	2 répétitions	E	L	E	380	564	380	gist125_6	120 ms	R-gist	1		4	E	2			2	MF_N_oldGist_120_2
2	0 immédiat	paysage30	grotte	paysage	New-oldGist	meaningfull	2 répétitions	A	L	A	237	610	237	gist130_2	120 ms	R-gist	1		3	A	4			4	MF_N_oldGist_120_2
2	0 immédiat	animal3	sauterelle	animal	New-oldGist	meaningfull	1 répétition	R	S	R	1326	1270	1326	gist003_1	1920 ms	R-gist	0	1	2			R	8	8	MF_N_oldGist_1920_1
2	0 immédiat	animal39	cheval	animal	New-oldGist	meaningfull	1 répétition	R	L	R	301	443	301	gist039_1	1920 ms	R-gist	1		4	R	1			1	MF_N_oldGist_1920_1
2	0 immédiat	animal75	perroquet	animal	New-oldGist	meaningfull	1 répétition	R	S	R	1111	5669	1111	gist075_2	1920 ms	R-gist	0	1	4			R	8	8	MF_N_oldGist_1920_1
2	0 immédiat	fuit/legumes isoles4	banane	fruits/legumes	New-oldGist	meaningfull	1 répétition	E	S	E	484	2083	484	gist404_3	1920 ms	R-gist	0	1	4			E	7	7	MF_N_oldGist_1920_1
2	0 immédiat	fuit/legumes isoles27	pain	fruits/legumes	New-oldGist	meaningfull	1 répétition	A	S	A	928	531	928	gist427_2	1920 ms	R-gist	0	1	4			A	5	5	MF_N_oldGist_1920_1
2	0 immédiat	fuit/legumes isoles46	œuf	fruits/legumes	New-oldGist	meaningfull	1 répétition	R	S	R	366	441	366	gist447_2	1920 ms	R-gist	0	1	4			R	8	8	MF_N_oldGist_1920_1
2	0 immédiat	objet isole10	marteau	objet isole	New-oldGist	meaningfull	1 répétition	R	S	R	598	866	598	gist159_2	1920 ms	R-gist	0	1	4			R	8	8	MF_N_oldGist_1920_1
2	0 immédiat	paysage8	grand canyon	paysage	New-oldGist	meaningfull	1 répétition	R	S	R	315	1066	315	gist108_2	1920 ms	R-gist	0	1	4			R	8	8	MF_N_oldGist_1920_1
2	0 immédiat	paysage23	cascade	paysage	New-oldGist	meaningfull	1 répétition	A	L	A	566	28	566	gist123_2	1920 ms	R-gist	1		4	A	4			4	MF_N_oldGist_1920_1
2	0 immédiat	paysage28	farwest	paysage	New-oldGist	meaningfull	1 répétition	R	S	R	382	970	382	gist128_2	1920 ms	R-gist	0	1	4			R	8	8	MF_N_oldGist_1920_1
2	0 immédiat	animal15	poisson	animal	New-oldGist	meaningfull	2 répétitions	R	S	R	464	906	464	gist015_2	1920 ms	R-gist	0	1	4			R	8	8	MF_N_oldGist_1920_2
2	0 immédiat	animal47	chevre	animal	New-oldGist	meaningfull	2 répétitions	A	S	A	355	783	355	gist047_2	1920 ms	R-gist	0	1	3			A	5	5	MF_N_oldGist_1920_2
2	0 immédiat	animal78	casoar	animal	New-oldGist	meaningfull	2 répétitions	Z	L	Z	458	400	458	gist078_2	1920 ms	R-gist	1		4	Z	3			3	MF_N_oldGist_1920_2
2	0 immédiat	fuit/legumes isoles22	mais	fruits/legumes	New-oldGist	meaningfull	2 répétitions	E	S	E	264	626	264	gist422_3	1920 ms	R-gist	0	1	4			E	7	7	MF_N_oldGist_1920_2
2	0 immédiat	fuit/legumes isoles38	brocoli	fruits/legumes	New-oldGist	meaningfull	2 répétitions	R	S	R	391	1553	391	gist438_3	1920 ms	R-gist	0	1	4			R	8	8	MF_N_oldGist_1920_2
2	0 immédiat	fuit/legumes isoles57	pizza	fruits/legumes	New-oldGist	meaningfull	2 répétitions	R	S	R	646	1876	646	gist459_2	1920 ms	R-gist	0	1	4			R	8	8	MF_N_oldGist_1920_2
2	0 immédiat	objet isole1	balle	objet isole	New-oldGist	meaningfull	2 répétitions	E	S	E	540	1193	540	gist151_2	1920 ms	R-gist	0	1	4			E	7	7	MF_N_oldGist_1920_2
2	0 immédiat	objet isole17	compa	objet isole	New-oldGist	meaningfull	2 répétitions	A	S	A	1649	466	1649	gist166_2	1920 ms	R-gist	0	1	4			A	5	5	MF_N_oldGist_1920_2
2	0 immédiat	paysage15	fond marin	paysage	New-oldGist	meaningfull	2 répétitions	R	S	R	302	642	302	gist115_2	1920 ms	R-gist	0	1	4			R	8	8	MF_N_oldGist_1920_2
2	0 immédiat	paysage25	route	paysage	New-oldGist	meaningfull	2 répétitions	A	L	A	551	1735	551	gist125_7	1920 ms	R-gist	1		4	A	4			4	MF_N_oldGist_1920_2
2	0 immédiat	animal11	varan	animal	New	meaningfull	0 répétition	Z	S	Z	318	434	318	gist011_1		R-newgist	0	1	NA			Z	6	6	MF_new
2	0 immédiat	animal12	punaise	animal	New	meaningfull	0 répétition	R	S	R	199	1119	199	gist012_1		R-newgist	0	1	NA			R	8	8	MF_new
2	0 immédiat	animal14	libellule	animal	New	meaningfull	0 répétition	A	L	A	194	646	194	gist014_1		R-newgist	1		NA	A	4			4	MF_new
2	0 immédiat	animal19	orque	animal	New	meaningfull	0 répétition	E	S	E	6989	1695	6989	gist019_1		R-newgist	0	1	NA			E	7	7	MF_new
2	0 immédiat	animal23	buffle	animal	New	meaningfull	0 répétition	R	S	R	290	471	290	gist023_1		R-newgist	0	1	NA			R	8	8	MF_new
2	0 immédiat	animal24	hippopotame	animal	New	meaningfull	0 répétition	A	S	A	693	698	693	gist024_1		R-newgist	0	1	NA			A	5	5	MF_new
2	0 immédiat	animal32	renard	animal	New	meaningfull	0 répétition	R	S	R	602	1270	602	gist032_1		R-newgist	0	1	NA			R	8	8	MF_new
2	0 immédiat	animal34	lion	animal	New	meaningfull	0 répétition	R	L	R	245	1076	245	gist034_4		R-newgist	1		NA	R	1			1	MF_new
2	0 immédiat	animal36	chat	animal	New	meaningfull	0 répétition	R	S	R	712	668	712	gist036_2		R-newgist	0	1	NA			R	8	8	MF_new
2	0 immédiat	animal46	leopard	animal	New	meaningfull	0 répétition	R	L	R	655	53	655	gist046_2		R-newgist	1		NA	R	1			1	MF_new
2	0 immédiat	animal120	blereau	animal	New	meaningfull	0 répétition	R	S	R	670	756	670	gist050_2		R-newgist	0	1	NA			R	8	8	MF_new
2	0 immédiat	animal55	singe	animal	New	meaningfull	0 répétition	R	S	R	200	967	200	gist055_1		R-newgist	0	1	NA			R	8	8	MF_new
2	0 immédiat	animal66	autruche	animal	New	meaningfull	0 répétition	R	S	R	283	841	283	gist066_1		R-newgist	0	1	NA			R	8	8	MF_new
2	0 immédiat	animal69	oiseau	animal	New	meaningfull	0 répétition	R	S	R	825	431	825	gist069_1		R-newgist	0	1	NA			R	8	8	MF_new
2	0 immédiat	animal71	oie	animal	New	meaningfull	0 répétition	R	S	R	357	1259	357	gist071_1		R-newgist	0	1	NA			R	8	8	MF_new
2	0 immédiat	animal72	oiseau2	animal	New	meaningfull	0 répétition	Z	L	Z	328	686	328	gist072_1		R-newgist	1		NA	Z	3			3	MF_new
2	0 immédiat	fuit/legumes isoles11	kiwi	fruits/legumes	New	meaningfull	0 répétition	R	S	R	632	4780	632	gist411_1		R-newgist	0	1	NA			R	8	8	MF_new
2	0 immédiat	fuit/legumes isoles13	citron vert	fruits/legumes	New	meaningfull	0 répétition	Z	S	Z	1290	1372	1290	gist413_1		R-newgist	0	1	NA			Z	6	6	MF_new
2	0 immédiat	fuit/legumes isoles15	amande	fruits/legumes	New	meaningfull	0 répétition	R	L	R	216	427	216	gist415_2		R-newgist	1		NA	R	1			1	MF_new
2	0 immédiat	fuit/legumes isoles16	litchi	fruits/legumes	New	meaningfull	0 répétition	R	S	R	308	724	308	gist416_1		R-newgist	0	1	NA			R	8	8	MF_new
2	0 immédiat	fuit/legumes isoles17	melon	fruits/legumes	New	meaningfull	0 répétition	Z	L	Z	604	1237	604	gist417_1		R-newgist	1		NA	Z	3			3	MF_new
2	0 immédiat	fuit/legumes isoles20	courgette	fruits/legumes	New	meaningfull	0 répétition	R	L	R	538	4283	538	gist420_1		R-newgist	1		NA	R	1			1	MF_new
2	0 immédiat	fuit/legumes isoles21	framboise	fruits/legumes	New	meaningfull	0 répétition	Z	S	Z	366	939	366	gist421_1		R-newgist	0	1	NA			Z	6	6	MF_new
2	0 immédiat	fuit/legumes isoles23	gateau	fruits/legumes	New	meaningfull	0 répétition	R	S	R	2276	3052	2276	gist423_2		R-newgist	0	1	NA			R	8	8	MF_new
2	0 immédiat	fuit/legumes isoles24	hotdog	fruits/legumes	New	meaningfull	0 répétition	R	S	R	2388	1076	2388	gist424_2		R-newgist	0	1	NA			R	8	8	MF_new
2	0 immédiat	fuit/legumes isoles35	patate	fruits/legumes	New	meaningfull	0 répétition	R	S	R	481	908	481	gist435_2		R-newgist	0	1	NA			R	8	8	MF_new
2	0 immédiat	fuit/legumes isoles44	noisette	fruits/legumes	New	meaningfull	0 répétition	Z	L	Z	755	1629	755	gist444_2		R-newgist	1		NA	Z	3			3	MF_new
2	0 immédiat	fuit/legumes isoles48	figue	fruits/legumes	New	meaningfull	0 répétition	Z	L	Z	945	914	945	gist448_3		R-newgist	1		NA	Z	3			3	MF_new
2	0 immédiat	objet isole7	trombone	objet isole	New	meaningfull	0 répétition	R	S	R	824	3105	824	gist157_1		R-newgist	0	1	NA			R	8	8	MF_new
2	0 immédiat	objet isole9	fil	objet isole	New	meaningfull	0 répétition	E	S	E	334	727	334	gist158_1		R-newgist	0	1	NA			E	7	7	MF_new
2	0 immédiat	objet isole15	crayon	objet isole	New	meaningfull	0 répétition	Z	S	Z	1739	933	1739	gist164_1		R-newgist	0	1	NA			Z	6	6	MF_new
2	0 immédiat	objet isole27	pioche	objet isole	New	meaningfull	0 répétition	E	S	E	1525	9047	1525	gist176_1		R-newgist	0	1	NA			E	7	7	MF_new
2	0 immédiat	objet isole29	mèche	objet isole	New	meaningfull	0 répétition	R	S	R	519	1225	519	gist178_1		R-newgist	0	1	NA			R	8	8	MF_new
2	0 immédiat	objet isole30	niveau	objet isole	New	meaningfull	0 répétition	Z	S	Z	2050	1976	2050	gist179_1		R-newgist	0	1	NA			Z	6	6	MF_new
2	0 immédiat	paysage5	coucher de soleil	paysage	New	meaningfull	0 répétition	Z	L	Z	313	458	313	gist105_1		R-newgist	1		NA	Z	3			3	MF_new
2	0 immédiat	paysage7	foret	paysage	New	meaningfull	0 répétition	R	S	R	382	464	382	gist107_2		R-newgist	0	1	NA			R	8	8	MF_new
2	0 immédiat	paysage10	montagne	paysage	New	meaningfull	0 répétition	Z	S	Z	2000	2751	2000	gist110_1		R-newgist	0	1	NA			Z	6	6	MF_new
2	0 immédiat	paysage18	neige	paysage	New	meaningfull	0 répétition	A	S	A	1401	2560	1401	gist118_1		R-newgist	0	1	NA			A	5	5	MF_new
2	0 immédiat	paysage22	mer/montagne	paysage	New	meaningfull	0 répétition	Z	L	Z	200	545	200	gist122_1		R-newgist	1		NA	Z	3			3	MF_new
2	0 immédiat	paysage26	desert	paysage	New	meaningfull	0 répétition	R	S	R	232	667	232	gist126_1		R-newgist	0	1	NA			R	8	8	MF_new
2	0 immédiat	meaningless091	meanigless	meanigless	New	meaningless	0 répétition	E	S	E	334	3233	334	Image0007		New	0	1	4			E	7	7	ML_new
2	0 immédiat	meaningless109	meanigless	meanigless	New	meaningless	0 répétition	Z	S	Z	459	657	459	Image0008		New	0	1	3			Z	6	6	ML_new
2	0 immédiat	meaningless127	meanigless	meanigless	New	meaningless	0 répétition	R	S	R	421	872	421	Image0011		New	0	1	3			R	8	8	ML_new
2	0 immédiat	meaningless159	meanigless	meanigless	New	meaningless	0 répétition	R	S	R	260	437	260	Image0016		New	0	1	3			R	8	8	ML_new
2	0 immédiat	meaningless145	meanigless	meanigless	New	meaningless	0 répétition	R	S	R	718	3619	718	Image0069		New	0	1	3			R	8	8	ML_new
2	0 immédiat	meaningless092	meanigless	meanigless	New	meaningless	0 répétition	R	S	R	251	352	251	Image0084		New	0	1	4			R	8	8	ML_new
2	0 immédiat	meaningless110	meanigless	meanigless	New	meaningless	0 répétition	E	S	E	1306	1260	1306	Image0085		New	0	1	4			E	7	7	ML_new
2	0 immédiat	meaningless141	meanigless	meanigless	New	meaningless	0 répétition	R	S	R	519	4723	519	Image0086		New	0	1	4			R	8	8	ML_new
2	0 immédiat	meaningless160	meanigless	meanigless	New	meaningless	0 répétition	R	L	R	417	539	417	Image0089		New	1		3	R	1			1	ML_new
2	0 immédiat	meaningless146	meanigless	meanigless	New	meaningless	0 répétition	E	S	E	1134	1357	1134	Image0103		New	0	1	4			E	7	7	ML_new
2	0 immédiat	meaningless093	meanigless	meanigless	New	meaningless	0 répétition	Z	S	Z	775	1753	775	Image0119		New	0	1	2			Z	6	6	ML_new
2	0 immédiat	meaningless111	meanigless	meanigless	New	meaningless	0 répétition	A	L	A	279	1839	279	Image0122		New	1		4	A	4			4	ML_new
2	0 immédiat	meaningless128	meanigless	meanigless	New	meaningless	0 répétition	Z	L	Z	291	4154	291	Image0123		New	1		3	Z	3			3	ML_new
2	0 immédiat	meaningless147	meanigless	meanigless	New	meaningless	0 répétition	R	L	R	787	756	787	Image0155		New	1		4	R	1			1	ML_new
2	0 immédiat	meaningless094	meanigless	meanigless	New	meaningless	0 répétition	A	L	A	2297	3339	2297	Image0171		New	1		3	A	4			4	ML_new
2	0 immédiat	meaningless112	meanigless	meanigless	New	meaningless	0 répétition	R	S	R	386	591	386	Image0172		New	0	1	4			R	8	8	ML_new
2	0 immédiat	meaningless129	meanigless	meanigless	New	meaningless	0 répétition	A	S	A	374	969	374	Image0174		New	0	1	3			A	5	5	ML_new
2	0 immédiat	meaningless105	meanigless	meanigless	New	meaningless	0 répétition	Z	L	Z	364	668	364	Image0201		New	1		2	Z	3			3	ML_new
2	0 immédiat	meaningless123	meanigless	meanigless	New	meaningless	0 répétition	R	S	R	521	886	521	Image0202		New	0	1	4			R	8	8	ML_new
2	0 immédiat	meaningless148	meanigless	meanigless	New	meaningless	0 répétition	R	S	R	292	1708	292	Image0214		New	0	1	2			R	8	8	ML_new
2	0 immédiat	meaningless095	meanigless	meanigless	New	meaningless	0 répétition	E	S	E	970	2984	970	Image0235		New	0	1	3			E	7	7	ML_new
2	0 immédiat	meaningless124	meanigless	meanigless	New	meaningless	0 répétition	R	S	R	204	1918	204	Image0239		New	0	1	3			R	8	8	ML_new
2	0 immédiat	meaningless130	meanigless	meanigless	New	meaningless	0 répétition	A	L	A	388	1569	388	Image0240		New	1		3	A	4			4	ML_new
2	0 immédiat	meaningless149	meanigless	meanigless	New	meaningless	0 répétition	R	S	R	418	482	418	Image0340		New	0	1	3			R	8	8	ML_new
2	0 immédiat	meaningless087	meanigless	meanigless	New	meaningless	0 répétition	R	S	R	497	765	497	Image0381		New	0	1	3			R	8	8	ML_new
2	0 immédiat	meaningless096	meanigless	meanigless	New	meaningless	0 répétition	E	S	E	392	747	392	Image0386		New	0	1	3			E	7	7	ML_new
2	0 immédiat	meaningless113	meanigless	meanigless	New	meaningless	0 répétition	R	S	R	291	401	291	Image0402		New	0	1	3			R	8	8	ML_new
2	0 immédiat	meaningless131	meanigless	meanigless	New	meaningless	0 répétition	R	S	R	2388	3237	2388	Image0403		New	0	1	2			R	8	8	ML_new
2	0 immédiat	meaningless097	meanigless	meanigless	New	meaningless	0 répétition	R	S	R	203	647	203	Image0456		New	0	1	4			R	8	8	ML_new
2	0 immédiat	meaningless114	meanigless	meanigless	New	meaningless	0 répétition	R	S	R	1295	1159	1295	Image0457		New	0	1	3			R	8	8	ML_new
2	0 immédiat	meaningless132	meanigless	meanigless	New	meaningless	0 répétition	R	S	R	803	2624	803	Image0458		New	0	1	3			R	8	8	ML_new
2	0 immédiat	meaningless150	meanigless	meanigless	New	meaningless	0 répétition	Z	S	Z	401	653	401	Image0476		New	0	1	3			Z	6	6	ML_new
2	0 immédiat	meaningless098	meanigless	meanigless	New	meaningless	0 répétition	R	S	R	548	1363	548	Image0486		New	0	1	3			R	8	8	ML_new
2	0 immédiat	meaningless115	meanigless	meanigless	New	meaningless	0 répétition	R	S	R	166	817	166	Image0487		New	0	1	3			R	8	8	ML_new
2	0 immédiat	meaningless133	meanigless	meanigless	New	meaningless	0 répétition	Z	S	Z	327	539	327	Image0488		New	0	1	4			Z	6	6	ML_new
2	0 immédiat	meaningless151	meanigless	meanigless	New	meaningless	0 répétition	E	S	E	2257	3221	2257	Image0609		New	0	1	4			E	7	7	ML_new
2	0 immédiat	meaningless099	meanigless	meanigless	New	meaningless	0 répétition	R	S	R	527	3133	527	Image0617		New	0	1	3			R	8	8	ML_new
2	0 immédiat	meaningless116	meanigless	meanigless	New	meaningless	0 répétition	A	S	A	1230	1036	1230	Image0618		New	0	1	2			A	5	5	ML_new
2	0 immédiat	meaningless134	meanigless	meanigless	New	meaningless	0 répétition	R	S	R	621	688	621	Image0619		New	0	1	3			R	8	8	ML_new
2	0 immédiat	meaningless088	meanigless	meanigless	New	meaningless	0 répétition	R	S	R	1126	1204	1126	Image0630		New	0	1	3			R	8	8	ML_new
2	0 immédiat	meaningless152	meanigless	meanigless	New	meaningless	0 répétition	R	S	R	226	528	226	Image0635		New	0	1	3			R	8	8	ML_new
2	0 immédiat	meaningless081	meanigless	meanigless	New	meaningless	0 répétition	Z	S	Z	568	2318	568	Image0643		New	0	1	4			Z	6	6	ML_new
2	0 immédiat	meaningless100	meanigless	meanigless	New	meaningless	0 répétition	R	S	R	733	1149	733	Image0644		New	0	1	3			R	8	8	ML_new
2	0 immédiat	meaningless117	meanigless	meanigless	New	meaningless	0 répétition	R	S	R	240	650	240	Image0645		New	0	1	4			R	8	8	ML_new
2	0 immédiat	meaningless135	meanigless	meanigless	New	meaningless	0 répétition	E	S	E	2217	1146	2217	Image0646		New	0	1	4			E	7	7	ML_new
2	0 immédiat	meaningless153	meanigless	meanigless	New	meaningless	0 répétition	R	S	R	437	796	437	Image0664		New	0	1	4			R	8	8	ML_new
2	0 immédiat	meaningless082	meanigless	meanigless	New	meaningless	0 répétition	E	S	E	404	1109	404	Image0671		New	0	1	4			E	7	7	ML_new
2	0 immédiat	meaningless101	meanigless	meanigless	New	meaningless	0 répétition	A	S	A	282	449	282	Image0672		New	0	1	4			A	5	5	ML_new
2	0 immédiat	meaningless118	meanigless	meanigless	New	meaningless	0 répétition	R	L	R	316	1147	316	Image0673		New	1		4	R	1			1	ML_new
2	0 immédiat	meaningless136	meanigless	meanigless	New	meaningless	0 répétition	E	S	E	657	2430	657	Image0674		New	0	1	4			E	7	7	ML_new
2	0 immédiat	meaningless154	meanigless	meanigless	New	meaningless	0 répétition	Z	S	Z	937	2750	937	Image0691		New	0	1	3			Z	6	6	ML_new
2	0 immédiat	meaningless083	meanigless	meanigless	New	meaningless	0 répétition	Z	S	Z	1487	1672	1487	Image0698		New	0	1	4			Z	6	6	ML_new
2	0 immédiat	meaningless102	meanigless	meanigless	New	meaningless	0 répétition	A	L	A	264	2077	264	Image0701		New	1		4	A	4			4	ML_new
2	0 immédiat	meaningless119	meanigless	meanigless	New	meaningless	0 répétition	Z	S	Z	307	808	307	Image0702		New	0	1	3			Z	6	6	ML_new
2	0 immédiat	meaningless137	meanigless	meanigless	New	meaningless	0 répétition	Z	S	Z	1362	3314	1362	Image0704		New	0	1	4			Z	6	6	ML_new
2	0 immédiat	meaningless155	meanigless	meanigless	New	meaningless	0 répétition	A	L	A	530	871	530	Image0896		New	1		4	A	4			4	ML_new
2	0 immédiat	meaningless084	meanigless	meanigless	New	meaningless	0 répétition	A	S	A	246	851	246	Image0932		New	0	1	4			A	5	5	ML_new
2	0 immédiat	meaningless103	meanigless	meanigless	New	meaningless	0 répétition	R	S	R	1977	2352	1977	Image0933		New	0	1	4			R	8	8	ML_new
2	0 immédiat	meaningless120	meanigless	meanigless	New	meaningless	0 répétition	R	S	R	303	519	303	Image1001		New	0	1	2			R	8	8	ML_new
2	0 immédiat	meaningless138	meanigless	meanigless	New	meaningless	0 répétition	R	S	R	180	952	180	Image1101		New	0	1	4			R	8	8	ML_new
2	0 immédiat	meaningless156	meanigless	meanigless	New	meaningless	0 répétition	E	S	E	248	801	248	Image1207		New	0	1	3			E	7	7	ML_new
2	0 immédiat	meaningless085	meanigless	meanigless	New	meaningless	0 répétition	R	S	R	246	916	246	Image1215		New	0	1	4			R	8	8	ML_new
2	0 immédiat	meaningless106	meanigless	meanigless	New	meaningless	0 répétition	R	S	R	1529	3410	1529	Image1216		New	0	1	4			R	8	8	ML_new
2	0 immédiat	meaningless121	meanigless	meanigless	New	meaningless	0 répétition	R	S	R	170	568	170	Image1217		New	0	1	4			R	8	8	ML_new
2	0 immédiat	meaningless139	meanigless	meanigless	New	meaningless	0 répétition	Z	L	Z	541	721	541	Image1218		New	1		4	Z	3			3	ML_new
2	0 immédiat	meaningless142	meanigless	meanigless	New	meaningless	0 répétition	R	S	R	1018	1627	1018	Image1232		New	0	1	4			R	8	8	ML_new
2	0 immédiat	meaningless157	meanigless	meanigless	New	meaningless	0 répétition	R	S	R	1174	1366	1174	Image1234		New	0	1	4			R	8	8	ML_new
2	0 immédiat	meaningless086	meanigless	meanigless	New	meaningless	0 répétition	E	S	E	377	1486	377	Image1245		New	0	1	4			E	7	7	ML_new
2	0 immédiat	meaningless104	meanigless	meanigless	New	meaningless	0 répétition	A	S	A	1662	1827	1662	Image1246		New	0	1	4			A	5	5	ML_new
2	0 immédiat	meaningless122	meanigless	meanigless	New	meaningless	0 répétition	Z	L	Z	254	325	254	Image1247		New	1		4	Z	3			3	ML_new
2	0 immédiat	meaningless140	meanigless	meanigless	New	meaningless	0 répétition	Z	L	Z	246	1751	246	Image1250		New	1		3	Z	3			3	ML_new
2	0 immédiat	meaningless158	meanigless	meanigless	New	meaningless	0 répétition	Z	S	Z	401	859	401	Image1273		New	0	1	4			Z	6	6	ML_new
2	0 immédiat	meaningless089	meanigless	meanigless	New	meaningless	0 répétition	R	S	R	282	967	282	R17		New	0	1	4			R	8	8	ML_new
2	0 immédiat	meaningless107	meanigless	meanigless	New	meaningless	0 répétition	R	S	R	358	1312	358	R18		New	0	1	4			R	8	8	ML_new
2	0 immédiat	meaningless125	meanigless	meanigless	New	meaningless	0 répétition	R	S	R	511	6281	511	R19		New	0	1	4			R	8	8	ML_new
2	0 immédiat	meaningless143	meanigless	meanigless	New	meaningless	0 répétition	Z	S	Z	392	474	392	R20		New	0	1	3			Z	6	6	ML_new
2	0 immédiat	meaningless090	meanigless	meanigless	New	meaningless	0 répétition	E	S	E	1224	1139	1224	R5		New	0	1	4			E	7	7	ML_new
2	0 immédiat	meaningless108	meanigless	meanigless	New	meaningless	0 répétition	R	S	R	362	2433	362	R6		New	0	1	4			R	8	8	ML_new
2	0 immédiat	meaningless126	meanigless	meanigless	New	meaningless	0 répétition	E	L	E	272	449	272	R7		New	1		4	E	2			2	ML_new
2	0 immédiat	meaningless144	meanigless	meanigless	New	meaningless	0 répétition	A	L	A	1157	565	1157	R8		New	1		3	A	4			4	ML_new
2	0 immédiat	meaningless177	meanigless	meanigless	Old	meaningless	1 répétition	R	S	R	621	509	621	Image0070	120 ms	Old	0	1	4			R	8	8	ML_old_120_1
2	0 immédiat	meaningless209	meanigless	meanigless	Old	meaningless	1 répétition	R	S	R	212	369	212	Image0071	120 ms	Old	0	1	2			R	8	8	ML_old_120_1
2	0 immédiat	meaningless161	meanigless	meanigless	Old	meaningless	1 répétition	R	L	R	1099	3590	1099	Image0128	120 ms	Old	1		a	R	1			1	ML_old_120_1
2	0 immédiat	meaningless225	meanigless	meanigless	Old	meaningless	1 répétition	R	S	R	316	1710	316	Image0132	120 ms	Old	0	1	4			R	8	8	ML_old_120_1
2	0 immédiat	meaningless193	meanigless	meanigless	Old	meaningless	1 répétition	A	L	A	644	400	644	Image0178	120 ms	Old	1		4	A	4			4	ML_old_120_1
2	0 immédiat	meaningless181	meanigless	meanigless	Old	meaningless	1 répétition	R	L	R	483	1328	483	Image0344	120 ms	Old	1		4	R	1			1	ML_old_120_1
2	0 immédiat	meaningless213	meanigless	meanigless	Old	meaningless	1 répétition	A	L	A	797	1493	797	Image0348	120 ms	Old	1		4	A	4			4	ML_old_120_1
2	0 immédiat	meaningless173	meanigless	meanigless	Old	meaningless	1 répétition	Z	S	Z	1674	1161	1674	Image0425	120 ms	Old	0	1	a			Z	6	6	ML_old_120_1
2	0 immédiat	meaningless237	meanigless	meanigless	Old	meaningless	1 répétition	R	S	R	1078	1582	1078	Image0427	120 ms	Old	0	1	4			R	8	8	ML_old_120_1
2	0 immédiat	meaningless165	meanigless	meanigless	Old	meaningless	1 répétition	E	S	E	522	1771	522	Image0461	120 ms	Old	0	1	4			E	7	7	ML_old_120_1
2	0 immédiat	meaningless229	meanigless	meanigless	Old	meaningless	1 répétition	Z	L	Z	1336	1383	1336	Image0465	120 ms	Old	1		4	Z	3			3	ML_old_120_1
2	0 immédiat	meaningless206	meanigless	meanigless	Old	meaningless	1 répétition	R	L	R	2182	2133	2182	Image0477	120 ms	Old	1		4	R	1			1	ML_old_120_1
2	0 immédiat	meaningless197	meanigless	meanigless	Old	meaningless	1 répétition	Z	S	Z	589	858	589	Image0501	120 ms	Old	0	1	3			Z	6	6	ML_old_120_1
2	0 immédiat	meaningless185	meanigless	meanigless	Old	meaningless	1 répétition	R	S	R	327	3985	327	Image0665	120 ms	Old	0	1	4			R	8	8	ML_old_120_1
2	0 immédiat	meaningless217	meanigless	meanigless	Old	meaningless	1 répétition	R	S	R	456	543	456	Image0666	120 ms	Old	0	1	4			R	8	8	ML_old_120_1
2	0 immédiat	meaningless169	meanigless	meanigless	Old	meaningless	1 répétition	R	S	R	583	269	583	Image0676	120 ms	Old	0	1	4			R	8	8	ML_old_120_1
2	0 immédiat	meaningless233	meanigless	meanigless	Old	meaningless	1 répétition	R	S	R	360	546	360	Image0785	120 ms	Old	0	1	4			R	8	8	ML_old_120_1
2	0 immédiat	meaningless202	meanigless	meanigless	Old	meaningless	1 répétition	A	L	A	283	2209	283	Image1104	120 ms	Old	1		4	A	4			4	ML_old_120_1
2	0 immédiat	meaningless189	meanigless	meanigless	Old	meaningless	1 répétition	R	S	R	1485	1796	1485	Image1235	120 ms	Old	0	1	3			R	8	8	ML_old_120_1
2	0 immédiat	meaningless221	meanigless	meanigless	Old	meaningless	1 répétition	Z	L	Z	609	7348	609	Image1236	120 ms	Old	1		3	Z	3			3	ML_old_120_1
2	0 immédiat	meaningless191	meanigless	meanigless	Old	meaningless	2 répétitions	R	S	R	279	792	279	Image0017	120 ms	Old	0	1	4			R	8	8	ML_old_120_2
2	0 immédiat	meaningless223	meanigless	meanigless	Old	meaningless	2 répétitions	R	L	R	268	489	268	Image0018	120 ms	Old	1		4	R	1			1	ML_old_120_2
2	0 immédiat	meaningless179	meanigless	meanigless	Old	meaningless	2 répétitions	A	S	A	723	2463	723	Image0157	120 ms	Old	0	1	4			A	5	5	ML_old_120_2
2	0 immédiat	meaningless211	meanigless	meanigless	Old	meaningless	2 répétitions	E	S	E	1180	1478	1180	Image0162	120 ms	Old	0	1	4			E	7	7	ML_old_120_2
2	0 immédiat	meaningless163	meanigless	meanigless	Old	meaningless	2 répétitions	R	L	R	346	465	346	Image0242	120 ms	Old	1		4	R	1			1	ML_old_120_2
2	0 immédiat	meaningless227	meanigless	meanigless	Old	meaningless	2 répétitions	R	L	R	519	933	519	Image0246	120 ms	Old	1		4	R	1			1	ML_old_120_2
2	0 immédiat	meaningless195	meanigless	meanigless	Old	meaningless	2 répétitions	Z	L	Z	240	345	240	Image0412	120 ms	Old	1		4	Z	3			3	ML_old_120_2
2	0 immédiat	meaningless183	meanigless	meanigless	Old	meaningless	2 répétitions	R	S	R	309	1473	309	Image0610	120 ms	Old	0	1	4			R	8	8	ML_old_120_2
2	0 immédiat	meaningless215	meanigless	meanigless	Old	meaningless	2 répétitions	Z	S	Z	468	1588	468	Image0611	120 ms	Old	0	1	4			Z	6	6	ML_old_120_2
2	0 immédiat	meaningless167	meanigless	meanigless	Old	meaningless	2 répétitions	R	S	R	329	671	329	Image0621	120 ms	Old	0	1	4			R	8	8	ML_old_120_2
2	0 immédiat	meaningless231	meanigless	meanigless	Old	meaningless	2 répétitions	Z	L	Z	1647	1955	1647	Image0623	120 ms	Old	1		4	Z	3			3	ML_old_120_2
2	0 immédiat	meaningless199	meanigless	meanigless	Old	meaningless	2 répétitions	R	L	R	581	1183	581	Image0651	120 ms	Old	1		4	R	1			1	ML_old_120_2
2	0 immédiat	meaningless187	meanigless	meanigless	Old	meaningless	2 répétitions	R	L	R	390	681	390	Image0897	120 ms	Old	1		4	R	1			1	ML_old_120_2
2	0 immédiat	meaningless219	meanigless	meanigless	Old	meaningless	2 répétitions	E	S	E	678	573	678	Image0916	120 ms	Old	0	1	3			E	7	7	ML_old_120_2
2	0 immédiat	meaningless171	meanigless	meanigless	Old	meaningless	2 répétitions	R	S	R	211	1763	211	Image1103	120 ms	Old	0	1	4			R	8	8	ML_old_120_2
2	0 immédiat	meaningless235	meanigless	meanigless	Old	meaningless	2 répétitions	R	S	R	484	672	484	Image1222	120 ms	Old	0	1	4			R	8	8	ML_old_120_2
2	0 immédiat	meaningless204	meanigless	meanigless	Old	meaningless	2 répétitions	Z	L	Z	323	710	323	Image1253	120 ms	Old	1		4	Z	3			3	ML_old_120_2
2	0 immédiat	meaningless175	meanigless	meanigless	Old	meaningless	2 répétitions	A	S	A	1130	673	1130	R10	120 ms	Old	0	1	4			A	5	5	ML_old_120_2
2	0 immédiat	meaningless239	meanigless	meanigless	Old	meaningless	2 répétitions	E	L	E	285	439	285	R12	120 ms	Old	1		4	E	2			2	ML_old_120_2
2	0 immédiat	meaningless208	meanigless	meanigless	Old	meaningless	2 répétitions	R	L	R	375	522	375	R23	120 ms	Old	1		4	R	1			1	ML_old_120_2
2	0 immédiat	meaningless178	meanigless	meanigless	Old	meaningless	1 répétition	R	L	R	256	1068	256	Image0107	1920 ms	Old	1		4	R	1			1	ML_old_1920_1
2	0 immédiat	meaningless210	meanigless	meanigless	Old	meaningless	1 répétition	R	S	R	300	3860	300	Image0108	1920 ms	Old	0	1	4			R	8	8	ML_old_1920_1
2	0 immédiat	meaningless205	meanigless	meanigless	Old	meaningless	1 répétition	R	L	R	309	466	309	Image0129	1920 ms	Old	1		a	R	1			1	ML_old_1920_1
2	0 immédiat	meaningless162	meanigless	meanigless	Old	meaningless	1 répétition	Z	L	Z	349	519	349	Image0176	1920 ms	Old	1		4	Z	3			3	ML_old_1920_1
2	0 immédiat	meaningless226	meanigless	meanigless	Old	meaningless	1 répétition	Z	L	Z	1379	2631	1379	Image0179	1920 ms	Old	1		4	Z	3			3	ML_old_1920_1
2	0 immédiat	meaningless194	meanigless	meanigless	Old	meaningless	1 répétition	R	L	R	368	581	368	Image0243	1920 ms	Old	1		4	R	1			1	ML_old_1920_1
2	0 immédiat	meaningless182	meanigless	meanigless	Old	meaningless	1 répétition	E	S	E	578	2831	578	Image0426	1920 ms	Old	0	1	4			E	7	7	ML_old_1920_1
2	0 immédiat	meaningless214	meanigless	meanigless	Old	meaningless	1 répétition	R	L	R	501	1719	501	Image0478	1920 ms	Old	1		4	R	1			1	ML_old_1920_1
2	0 immédiat	meaningless166	meanigless	meanigless	Old	meaningless	1 répétition	R	L	R	969	514	969	Image0494	1920 ms	Old	1		4	R	1			1	ML_old_1920_1
2	0 immédiat	meaningless230	meanigless	meanigless	Old	meaningless	1 répétition	R	L	R	649	421	649	Image0542	1920 ms	Old	1		4	R	1			1	ML_old_1920_1
2	0 immédiat	meaningless198	meanigless	meanigless	Old	meaningless	1 répétition	R	S	R	807	1120	807	Image0622	1920 ms	Old	0	1	2			R	8	8	ML_old_1920_1
2	0 immédiat	meaningless238	meanigless	meanigless	Old	meaningless	1 répétition	R	L	R	340	2561	340	Image0680	1920 ms	Old	1		4	R	1			1	ML_old_1920_1
2	0 immédiat	meaningless186	meanigless	meanigless	Old	meaningless	1 répétition	R	L	R	522	682	522	Image0692	1920 ms	Old	1		4	R	1			1	ML_old_1920_1
2	0 immédiat	meaningless218	meanigless	meanigless	Old	meaningless	1 répétition	R	L	R	306	2775	306	Image0693	1920 ms	Old	1		4	R	1			1	ML_old_1920_1
2	0 immédiat	meaningless170	meanigless	meanigless	Old	meaningless	1 répétition	R	S	R	4965	610	4965	Image0760	1920 ms	Old	0	1	4			R	8	8	ML_old_1920_1
2	0 immédiat	meaningless201	meanigless	meanigless	Old	meaningless	1 répétition	R	S	R	705	1484	705	Image0764	1920 ms	Old	0	1	4			R	8	8	ML_old_1920_1
2	0 immédiat	meaningless234	meanigless	meanigless	Old	meaningless	1 répétition	R	L	R	274	335	274	Image1105	1920 ms	Old	1		4	R	1			1	ML_old_1920_1
2	0 immédiat	meaningless174	meanigless	meanigless	Old	meaningless	1 répétition	Z	S	Z	460	5522	460	Image1252	1920 ms	Old	0	1	4			Z	6	6	ML_old_1920_1
2	0 immédiat	meaningless190	meanigless	meanigless	Old	meaningless	1 répétition	R	L	R	4642	1077	4642	Image1274	1920 ms	Old	1		4	R	1			1	ML_old_1920_1
2	0 immédiat	meaningless222	meanigless	meanigless	Old	meaningless	1 répétition	R	L	R	281	551	281	Image1277	1920 ms	Old	1		4	R	1			1	ML_old_1920_1
2	0 immédiat	meaningless192	meanigless	meanigless	Old	meaningless	2 répétitions	R	L	R	263	873	263	Image0090	1920 ms	Old	1		4	R	1			1	ML_old_1920_2
2	0 immédiat	meaningless224	meanigless	meanigless	Old	meaningless	2 répétitions	R	L	R	224	367	224	Image0091	1920 ms	Old	1		4	R	1			1	ML_old_1920_2
2	0 immédiat	meaningless180	meanigless	meanigless	Old	meaningless	2 répétitions	E	L	E	468	603	468	Image0215	1920 ms	Old	1		4	E	2			2	ML_old_1920_2
2	0 immédiat	meaningless212	meanigless	meanigless	Old	meaningless	2 répétitions	R	L	R	396	468	396	Image0220	1920 ms	Old	1		4	R	1			1	ML_old_1920_2
2	0 immédiat	meaningless164	meanigless	meanigless	Old	meaningless	2 répétitions	Z	L	Z	381	1861	381	Image0411	1920 ms	Old	1		4	Z	3			3	ML_old_1920_2
2	0 immédiat	meaningless228	meanigless	meanigless	Old	meaningless	2 répétitions	R	L	R	335	994	335	Image0413	1920 ms	Old	1		4	R	1			1	ML_old_1920_2
2	0 immédiat	meaningless196	meanigless	meanigless	Old	meaningless	2 répétitions	R	L	R	278	826	278	Image0462	1920 ms	Old	1		4	R	1			1	ML_old_1920_2
2	0 immédiat	meaningless184	meanigless	meanigless	Old	meaningless	2 répétitions	E	L	E	276	723	276	Image0636	1920 ms	Old	1		4	E	2			2	ML_old_1920_2
2	0 immédiat	meaningless216	meanigless	meanigless	Old	meaningless	2 répétitions	R	L	R	391	631	391	Image0637	1920 ms	Old	1		4	R	1			1	ML_old_1920_2
2	0 immédiat	meaningless168	meanigless	meanigless	Old	meaningless	2 répétitions	R	S	R	210	892	210	Image0649	1920 ms	Old	0	1	4			R	8	8	ML_old_1920_2
2	0 immédiat	meaningless232	meanigless	meanigless	Old	meaningless	2 répétitions	R	L	R	485	498	485	Image0652	1920 ms	Old	1		4	R	1			1	ML_old_1920_2
2	0 immédiat	meaningless200	meanigless	meanigless	Old	meaningless	2 répétitions	R	L	R	370	642	370	Image0677	1920 ms	Old	1		4	R	1			1	ML_old_1920_2
2	0 immédiat	meaningless188	meanigless	meanigless	Old	meaningless	2 répétitions	R	L	R	535	526	535	Image1208	1920 ms	Old	1		4	R	1			1	ML_old_1920_2
2	0 immédiat	meaningless220	meanigless	meanigless	Old	meaningless	2 répétitions	R	L	R	371	447	371	Image1209	1920 ms	Old	1		4	R	1			1	ML_old_1920_2
2	0 immédiat	meaningless172	meanigless	meanigless	Old	meaningless	2 répétitions	R	L	R	408	1946	408	Image1220	1920 ms	Old	1		4	R	1			1	ML_old_1920_2
2	0 immédiat	meaningless203	meanigless	meanigless	Old	meaningless	2 répétitions	R	L	R	241	417	241	Image1221	1920 ms	Old	1		4	R	1			1	ML_old_1920_2
2	0 immédiat	meaningless236	meanigless	meanigless	Old	meaningless	2 répétitions	R	L	R	210	3928	210	Image1254	1920 ms	Old	1		4	R	1			1	ML_old_1920_2
2	0 immédiat	meaningless207	meanigless	meanigless	Old	meaningless	2 répétitions	R	L	R	270	639	270	R11	1920 ms	Old	1		4	R	1			1	ML_old_1920_2
2	0 immédiat	meaningless176	meanigless	meanigless	Old	meaningless	2 répétitions	R	L	R	266	571	266	R22	1920 ms	Old	1		4	R	1			1	ML_old_1920_2
2	0 immédiat	meaningless240	meanigless	meanigless	Old	meaningless	2 répétitions	R	L	R	299	1645	299	R24	1920 ms	Old	1		4	R	1			1	ML_old_1920_2
3	0 immédiat	animal5	papillon	animal	Old	meaningfull	1 répétition	r	s	r	2701	2823	2701	gist005_1	120 ms	Old	0	1	4			r	8	8	MF_old_120_1
3	0 immédiat	animal17	dauphin	animal	Old	meaningfull	1 répétition	r	s	r	326	723	326	gist017_2	120 ms	Old	0	1	4			r	8	8	MF_old_120_1
3	0 immédiat	animal26	ours	animal	Old	meaningfull	1 répétition	r	s	r	265	420	265	gist026_2	120 ms	Old	0	1	4			r	8	8	MF_old_120_1
3	0 immédiat	animal35	tigre	animal	Old	meaningfull	1 répétition	r	s	r	246	319	246	gist035_2	120 ms	Old	0	1	4			r	8	8	MF_old_120_1
3	0 immédiat	animal42	giraffe	animal	Old	meaningfull	1 répétition	r	l	r	487	733	487	gist042_3	120 ms	Old	1		4	r	1			1	MF_old_120_1
3	0 immédiat	animal52	bouc	animal	Old	meaningfull	1 répétition	z	l	z	1445	411	1445	gist052_2	120 ms	Old	1		4	z	3			3	MF_old_120_1
3	0 immédiat	animal60	panthère noire	animal	Old	meaningfull	1 répétition	z	s	z	798	3126	798	gist060_2	120 ms	Old	0	1	4			z	6	6	MF_old_120_1
3	0 immédiat	animal79	cigogne	animal	Old	meaningfull	1 répétition	z	s	z	3272	1656	3272	gist079_1	120 ms	Old	0	1	4			z	6	6	MF_old_120_1
3	0 immédiat	fuit/legumes isoles9	pasteque	fruits/legumes	Old	meaningfull	1 répétition	r	s	r	419	1193	419	gist409_1	120 ms	Old	0	1	4			r	8	8	MF_old_120_1
3	0 immédiat	fuit/legumes isoles30	choux	fruits/legumes	Old	meaningfull	1 répétition	r	s	r	609	410	609	gist430_2	120 ms	Old	0	1	4			r	8	8	MF_old_120_1
3	0 immédiat	fuit/legumes isoles36	paplemousse	fruits/legumes	Old	meaningfull	1 répétition	r	l	r	346	559	346	gist436_2	120 ms	Old	1		4	r	1			1	MF_old_120_1
3	0 immédiat	fuit/legumes isoles45	haricot	fruits/legumes	Old	meaningfull	1 répétition	a	l	a	852	10043	852	gist446_2	120 ms	Old	1		4	a	4			4	MF_old_120_1
3	0 immédiat	fuit/legumes isoles56	poivron	fruits/legumes	Old	meaningfull	1 répétition	r	s	r	348	706	348	gist457_1	120 ms	Old	0	1	4			r	8	8	MF_old_120_1
3	0 immédiat	objet isole5	eponde	objet isole	Old	meaningfull	1 répétition	r	l	r	262	436	262	gist155_1	120 ms	Old	1		4	r	1			1	MF_old_120_1
3	0 immédiat	objet isole13	ciseau	objet isole	Old	meaningfull	1 répétition	e	l	e	1031	1464	1031	gist162_1	120 ms	Old	1		4	e	2			2	MF_old_120_1
3	0 immédiat	objet isole23	des	objet isole	Old	meaningfull	1 répétition	r	l	r	519	724	519	gist172_1	120 ms	Old	1		4	r	1			1	MF_old_120_1
3	0 immédiat	objet isole31	spatule	objet isole	Old	meaningfull	1 répétition	z	s	z	522	1088	522	gist180_1	120 ms	Old	0	1	4			z	6	6	MF_old_120_1
3	0 immédiat	paysage7	foret	paysage	Old	meaningfull	1 répétition	r	s	r	440	900	440	gist107_1	120 ms	Old	0	1	4			r	8	8	MF_old_120_1
3	0 immédiat	paysage19	champ	paysage	Old	meaningfull	1 répétition	r	s	r	400	1805	400	gist119_1	120 ms	Old	0	1	4			r	8	8	MF_old_120_1
3	0 immédiat	paysage25	route	paysage	Old	meaningfull	1 répétition	r	s	r	373	640	373	gist125_4	120 ms	Old	0	1	4			r	8	8	MF_old_120_1
3	0 immédiat	animal8	tortue	animal	Old	meaningfull	2 répétitions	r	l	r	224	552	224	gist008_1	120 ms	Old	1		4	r	1			1	MF_old_120_2
3	0 immédiat	animal21	rinoceroce	animal	Old	meaningfull	2 répétitions	r	s	r	228	1229	228	gist021_1	120 ms	Old	0	1	4			r	8	8	MF_old_120_2
3	0 immédiat	animal31	loup	animal	Old	meaningfull	2 répétitions	r	s	r	468	550	468	gist031_1	120 ms	Old	0	1	4			r	8	8	MF_old_120_2
3	0 immédiat	animal40	cerf	animal	Old	meaningfull	2 répétitions	r	s	r	479	703	479	gist040_2	120 ms	Old	0	1	4			r	8	8	MF_old_120_2
3	0 immédiat	animal45	kangourou	animal	Old	meaningfull	2 répétitions	z	s	z	7028	1101	7028	gist045_1	120 ms	Old	0	1	4			z	6	6	MF_old_120_2
3	0 immédiat	animal54	mouton	animal	Old	meaningfull	2 répétitions	r	s	r	416	2716	416	gist054_1	120 ms	Old	0	1	4			r	8	8	MF_old_120_2
3	0 immédiat	animal67	pinguin	animal	Old	meaningfull	2 répétitions	r	l	r	333	1916	333	gist067_1	120 ms	Old	1		4	r	1			1	MF_old_120_2
3	0 immédiat	fuit/legumes isoles3	orange	fruits/legumes	Old	meaningfull	2 répétitions	r	l	r	397	1007	397	gist403_2	120 ms	Old	1		4	r	1			1	MF_old_120_2
3	0 immédiat	fuit/legumes isoles19	tomate	fruits/legumes	Old	meaningfull	2 répétitions	r	s	r	1029	12095	1029	gist419_1	120 ms	Old	0	1	4			r	8	8	MF_old_120_2
3	0 immédiat	fuit/legumes isoles33	myrtille	fruits/legumes	Old	meaningfull	2 répétitions	r	l	r	607	536	607	gist433_2	120 ms	Old	1		4	r	1			1	MF_old_120_2
3	0 immédiat	fuit/legumes isoles40	jambon	fruits/legumes	Old	meaningfull	2 répétitions	r	l	r	675	927	675	gist440_2	120 ms	Old	1		2	r	1			1	MF_old_120_2
3	0 immédiat	fuit/legumes isoles51	blette	fruits/legumes	Old	meaningfull	2 répétitions	e	l	e	297	470	297	gist451_2	120 ms	Old	1		4	e	2			2	MF_old_120_2
3	0 immédiat	fuit/legumes isoles59	radis	fruits/legumes	Old	meaningfull	2 répétitions	r	l	r	947	1259	947	gist461_1	120 ms	Old	1		4	r	1			1	MF_old_120_2
3	0 immédiat	objet isole3	brosse à dent	objet isole	Old	meaningfull	2 répétitions	r	s	r	1934	1382	1934	gist153_1	120 ms	Old	0	1	4			r	8	8	MF_old_120_2
3	0 immédiat	objet isole11	toune_visse	objet isole	Old	meaningfull	2 répétitions	r	s	r	1604	40	1604	gist160_1	120 ms	Old	0	1	4			r	8	8	MF_old_120_2
3	0 immédiat	objet isole16	couverts	objet isole	Old	meaningfull	2 répétitions	r	l	r	1044	920	1044	gist165_1	120 ms	Old	1		4	r	1			1	MF_old_120_2
3	0 immédiat	objet isole26	scie	objet isole	Old	meaningfull	2 répétitions	r	l	r	1052	584	1052	gist175_1	120 ms	Old	1		4	r	1			1	MF_old_120_2
3	0 immédiat	paysage2	plage	paysage	Old	meaningfull	2 répétitions	r	l	r	307	434	307	gist102_1	120 ms	Old	1		4	r	1			1	MF_old_120_2
3	0 immédiat	paysage13	desert:steppe	paysage	Old	meaningfull	2 répétitions	r	l	r	619	334	619	gist113_2	120 ms	Old	1		4	r	1			1	MF_old_120_2
3	0 immédiat	paysage25	route	paysage	Old	meaningfull	2 répétitions	r	l	r	1167	5213	1167	gist125_1	120 ms	Old	1		4	r	1			1	MF_old_120_2
3	0 immédiat	animal6	grenouille	animal	Old	meaningfull	1 répétition	r	l	r	379	2083	379	gist006_1	1920 ms	Old	1		4	r	1			1	MF_old_1920_1
3	0 immédiat	animal18	ours polaire	animal	Old	meaningfull	1 répétition	r	l	r	225	488	225	gist018_2	1920 ms	Old	1		2	r	1			1	MF_old_1920_1
3	0 immédiat	animal30	chien	animal	Old	meaningfull	1 répétition	r	l	r	312	441	312	gist030_1	1920 ms	Old	1		4	r	1			1	MF_old_1920_1
3	0 immédiat	animal38	zebre	animal	Old	meaningfull	1 répétition	e	l	e	935	1874	935	gist038_1	1920 ms	Old	1		4	e	2			2	MF_old_1920_1
3	0 immédiat	animal44	vache	animal	Old	meaningfull	1 répétition	r	l	r	2077	1395	2077	gist044_2	1920 ms	Old	1		4	r	1			1	MF_old_1920_1
3	0 immédiat	animal53	bison	animal	Old	meaningfull	1 répétition	r	s	r	356	3473	356	gist053_1	1920 ms	Old	0	1	4			r	8	8	MF_old_1920_1
3	0 immédiat	animal62	ane	animal	Old	meaningfull	1 répétition	r	l	r	317	363	317	gist062_1	1920 ms	Old	1		4	r	1			1	MF_old_1920_1
3	0 immédiat	animal80	coq	animal	Old	meaningfull	1 répétition	r	l	r	440	595	440	gist080_1	1920 ms	Old	1		4	r	1			1	MF_old_1920_1
3	0 immédiat	fuit/legumes isoles1	pomme	fruits/legumes	Old	meaningfull	1 répétition	r	l	r	2268	154	2268	gist401_1	1920 ms	Old	1		4	r	1			1	MF_old_1920_1
3	0 immédiat	fuit/legumes isoles18	champignion	fruits/legumes	Old	meaningfull	1 répétition	r	l	r	381	720	381	gist418_2	1920 ms	Old	1		4	r	1			1	MF_old_1920_1
3	0 immédiat	fuit/legumes isoles32	cacahouette	fruits/legumes	Old	meaningfull	1 répétition	r	l	r	246	476	246	gist432_2	1920 ms	Old	1		4	r	1			1	MF_old_1920_1
3	0 immédiat	fuit/legumes isoles39	poulet	fruits/legumes	Old	meaningfull	1 répétition	r	l	r	513	812	513	gist439_2	1920 ms	Old	1		4	r	1			1	MF_old_1920_1
3	0 immédiat	fuit/legumes isoles47	avocat	fruits/legumes	Old	meaningfull	1 répétition	r	l	r	315	401	315	gist448_1	1920 ms	Old	1		2	r	1			1	MF_old_1920_1
3	0 immédiat	fuit/legumes isoles58	croissant	fruits/legumes	Old	meaningfull	1 répétition	r	l	r	223	1527	223	gist460_1	1920 ms	Old	1		4	r	1			1	MF_old_1920_1
3	0 immédiat	objet isole4	peigne	objet isole	Old	meaningfull	1 répétition	r	l	r	262	531	262	gist154_1	1920 ms	Old	1		4	r	1			1	MF_old_1920_1
3	0 immédiat	objet isole14	pince à linge	objet isole	Old	meaningfull	1 répétition	r	l	r	494	816	494	gist163_1	1920 ms	Old	1		4	r	1			1	MF_old_1920_1
3	0 immédiat	objet isole24	pince	objet isole	Old	meaningfull	1 répétition	e	l	e	1293	756	1293	gist173_1	1920 ms	Old	1		4	e	2			2	MF_old_1920_1
3	0 immédiat	paysage11	montagne	paysage	Old	meaningfull	1 répétition	e	l	e	612	706	612	gist111_1	1920 ms	Old	1		4	e	2			2	MF_old_1920_1
3	0 immédiat	paysage20	champ	paysage	Old	meaningfull	1 répétition	r	l	r	486	540	486	gist120_1	1920 ms	Old	1		4	r	1			1	MF_old_1920_1
3	0 immédiat	paysage25	route	paysage	Old	meaningfull	1 répétition	r	l	r	282	5259	282	gist125_2	1920 ms	Old	1		2	r	1			1	MF_old_1920_1
3	0 immédiat	animal13	chenille	animal	Old	meaningfull	2 répétitions	r	l	r	467	2169	467	gist013_2	1920 ms	Old	1		4	r	1			1	MF_old_1920_2
3	0 immédiat	animal22	elephant	animal	Old	meaningfull	2 répétitions	r	l	r	855	928	855	gist022_2	1920 ms	Old	1		4	r	1			1	MF_old_1920_2
3	0 immédiat	animal33	panthère	animal	Old	meaningfull	2 répétitions	r	l	r	3716	2191	3716	gist033_1	1920 ms	Old	1		4	r	1			1	MF_old_1920_2
3	0 immédiat	animal41	oxyx	animal	Old	meaningfull	2 répétitions	r	l	r	356	490	356	gist041_2	1920 ms	Old	1		4	r	1			1	MF_old_1920_2
3	0 immédiat	animal48	ecureuil	animal	Old	meaningfull	2 répétitions	r	l	r	460	783	460	gist048_1	1920 ms	Old	1		4	r	1			1	MF_old_1920_2
3	0 immédiat	animal56	gorille	animal	Old	meaningfull	2 répétitions	r	l	r	425	1404	425	gist056_1	1920 ms	Old	1		4	r	1			1	MF_old_1920_2
3	0 immédiat	animal77	flaman rose	animal	Old	meaningfull	2 répétitions	r	l	r	1323	551	1323	gist077_1	1920 ms	Old	1		4	r	1			1	MF_old_1920_2
3	0 immédiat	fuit/legumes isoles5	raisin	fruits/legumes	Old	meaningfull	2 répétitions	r	l	r	551	790	551	gist405_1	1920 ms	Old	1		4	r	1			1	MF_old_1920_2
3	0 immédiat	fuit/legumes isoles28	cookies	fruits/legumes	Old	meaningfull	2 répétitions	r	l	r	278	452	278	gist428_2	1920 ms	Old	1		4	r	1			1	MF_old_1920_2
3	0 immédiat	fuit/legumes isoles34	mur	fruits/legumes	Old	meaningfull	2 répétitions	r	l	r	474	757	474	gist434_2	1920 ms	Old	1		4	r	1			1	MF_old_1920_2
3	0 immédiat	fuit/legumes isoles43	cafe	fruits/legumes	Old	meaningfull	2 répétitions	r	l	r	472	496	472	gist443_2	1920 ms	Old	1		4	r	1			1	MF_old_1920_2
3	0 immédiat	fuit/legumes isoles52	datte	fruits/legumes	Old	meaningfull	2 répétitions	r	l	r	647	525	647	gist452_3	1920 ms	Old	1		4	r	1			1	MF_old_1920_2
3	0 immédiat	fuit/legumes isoles60	carotte	fruits/legumes	Old	meaningfull	2 répétitions	r	l	r	675	393	675	gist462_1	1920 ms	Old	1		4	r	1			1	MF_old_1920_2
3	0 immédiat	objet isole8	epingles nourisse	objet isole	Old	meaningfull	2 répétitions	r	l	r	579	4418	579	gist157_2	1920 ms	Old	1		4	r	1			1	MF_old_1920_2
3	0 immédiat	objet isole22	raquette	objet isole	Old	meaningfull	2 répétitions	r	l	r	522	657	522	gist171_1	1920 ms	Old	1		4	r	1			1	MF_old_1920_2
3	0 immédiat	objet isole28	cle	objet isole	Old	meaningfull	2 répétitions	r	l	r	654	572	654	gist177_1	1920 ms	Old	1		4	r	1			1	MF_old_1920_2
3	0 immédiat	paysage4	rocher	paysage	Old	meaningfull	2 répétitions	r	l	r	1069	1203	1069	gist104_2	1920 ms	Old	1		4	r	1			1	MF_old_1920_2
3	0 immédiat	paysage16	champ de fleur	paysage	Old	meaningfull	2 répétitions	r	l	r	667	489	667	gist116_1	1920 ms	Old	1		4	r	1			1	MF_old_1920_2
3	0 immédiat	paysage25	route	paysage	Old	meaningfull	2 répétitions	a	l	a	3422	2301	3422	gist125_10	1920 ms	Old	1		4	a	4			4	MF_old_1920_2
3	0 immédiat	paysage25	route	paysage	Old	meaningfull	2 répétitions	r	l	r	486	1620	486	gist125_8	1920 ms	Old	1		4	r	1			1	MF_old_1920_2
3	0 immédiat	animal1	escargot	animal	New-oldGist	meaningfull	1 répétition	r	s	r	284	1951	284	gist001_2	120 ms	R-gist	0	1	2			r	8	8	MF_N_oldGist_120_1
3	0 immédiat	animal16	phoque	animal	New-oldGist	meaningfull	1 répétition	r	s	r	2242	4335	2242	gist016_2	120 ms	R-gist	0	1	3			r	8	8	MF_N_oldGist_120_1
3	0 immédiat	animal68	cygne	animal	New-oldGist	meaningfull	1 répétition	r	s	r	821	1860	821	gist068_2	120 ms	R-gist	0	1	3			r	8	8	MF_N_oldGist_120_1
3	0 immédiat	fuit/legumes isoles2	poire	fruits/legumes	New-oldGist	meaningfull	1 répétition	r	s	r	366	2374	366	gist402_1	120 ms	R-gist	0	1	3			r	8	8	MF_N_oldGist_120_1
3	0 immédiat	fuit/legumes isoles26	fromage	fruits/legumes	New-oldGist	meaningfull	1 répétition	r	s	r	624	3134	624	gist426_2	120 ms	R-gist	0	1	a			r	8	8	MF_N_oldGist_120_1
3	0 immédiat	fuit/legumes isoles42	steak	fruits/legumes	New-oldGist	meaningfull	1 répétition	r	s	r	410	874	410	gist442_2	120 ms	R-gist	0	1	3			r	8	8	MF_N_oldGist_120_1
3	0 immédiat	objet isole2	brosse	objet isole	New-oldGist	meaningfull	1 répétition	r	s	r	369	542	369	gist152_2	120 ms	R-gist	0	1	3			r	8	8	MF_N_oldGist_120_1
3	0 immédiat	paysage1	ciel	paysage	New-oldGist	meaningfull	1 répétition	r	s	r	240	635	240	gist101_2	120 ms	R-gist	0	1	2			r	8	8	MF_N_oldGist_120_1
3	0 immédiat	paysage17	banquise	paysage	New-oldGist	meaningfull	1 répétition	r	s	r	426	1363	426	gist117_1	120 ms	R-gist	0	1	4			r	8	8	MF_N_oldGist_120_1
3	0 immédiat	paysage27	fougère	paysage	New-oldGist	meaningfull	1 répétition	e	s	e	1359	9403	1359	gist127_2	120 ms	R-gist	0	1	2			e	7	7	MF_N_oldGist_120_1
3	0 immédiat	animal4	champigon	animal	New-oldGist	meaningfull	2 répétitions	r	s	r	530	764	530	gist004_1	120 ms	R-gist	0	1	2			r	8	8	MF_N_oldGist_120_2
3	0 immédiat	animal43	chameau	animal	New-oldGist	meaningfull	2 répétitions	r	s	r	255	614	255	gist043_2	120 ms	R-gist	0	1	2			r	8	8	MF_N_oldGist_120_2
3	0 immédiat	animal76	paon	animal	New-oldGist	meaningfull	2 répétitions	z	s	z	289	374	289	gist076_2	120 ms	R-gist	0	1	3			z	6	6	MF_N_oldGist_120_2
3	0 immédiat	fuit/legumes isoles6	noix de coco	fruits/legumes	New-oldGist	meaningfull	2 répétitions	r	l	r	802	1444	802	gist406_1	120 ms	R-gist	1		3	r	1			1	MF_N_oldGist_120_2
3	0 immédiat	fuit/legumes isoles37	pêche	fruits/legumes	New-oldGist	meaningfull	2 répétitions	a	l	a	839	6045	839	gist437_3	120 ms	R-gist	1		3	a	4			4	MF_N_oldGist_120_2
3	0 immédiat	fuit/legumes isoles49	kaki	fruits/legumes	New-oldGist	meaningfull	2 répétitions	r	s	r	679	2020	679	gist449_2	120 ms	R-gist	0	1	3			r	8	8	MF_N_oldGist_120_2
3	0 immédiat	objet isole12	pinceau	objet isole	New-oldGist	meaningfull	2 répétitions	r	s	r	525	1377	525	gist161_2	120 ms	R-gist	0	1	2			r	8	8	MF_N_oldGist_120_2
3	0 immédiat	paysage9	montagne eneige	paysage	New-oldGist	meaningfull	2 répétitions	z	s	z	280	793	280	gist109_2	120 ms	R-gist	0	1	3			z	6	6	MF_N_oldGist_120_2
3	0 immédiat	paysage25	route	paysage	New-oldGist	meaningfull	2 répétitions	r	s	r	390	1531	390	gist125_6	120 ms	R-gist	0	1	4			r	8	8	MF_N_oldGist_120_2
3	0 immédiat	paysage30	grotte	paysage	New-oldGist	meaningfull	2 répétitions	r	s	r	233	636	233	gist130_2	120 ms	R-gist	0	1	3			r	8	8	MF_N_oldGist_120_2
3	0 immédiat	animal3	sauterelle	animal	New-oldGist	meaningfull	1 répétition	r	s	r	286	1754	286	gist003_1	1920 ms	R-gist	0	1	4			r	8	8	MF_N_oldGist_1920_1
3	0 immédiat	animal39	cheval	animal	New-oldGist	meaningfull	1 répétition	r	s	r	1946	966	1946	gist039_1	1920 ms	R-gist	0	1	2			r	8	8	MF_N_oldGist_1920_1
3	0 immédiat	animal75	perroquet	animal	New-oldGist	meaningfull	1 répétition	r	s	r	125	2822	125	gist075_2	1920 ms	R-gist	0	1	3			r	8	8	MF_N_oldGist_1920_1
3	0 immédiat	fuit/legumes isoles4	banane	fruits/legumes	New-oldGist	meaningfull	1 répétition	r	s	r	476	388	476	gist404_3	1920 ms	R-gist	0	1	2			r	8	8	MF_N_oldGist_1920_1
3	0 immédiat	fuit/legumes isoles27	pain	fruits/legumes	New-oldGist	meaningfull	1 répétition	r	s	r	275	568	275	gist427_2	1920 ms	R-gist	0	1	2			r	8	8	MF_N_oldGist_1920_1
3	0 immédiat	fuit/legumes isoles46	œuf	fruits/legumes	New-oldGist	meaningfull	1 répétition	a	l	a	274	542	274	gist447_2	1920 ms	R-gist	1		3	a	4			4	MF_N_oldGist_1920_1
3	0 immédiat	objet isole10	marteau	objet isole	New-oldGist	meaningfull	1 répétition	e	s	e	506	834	506	gist159_2	1920 ms	R-gist	0	1	2			e	7	7	MF_N_oldGist_1920_1
3	0 immédiat	paysage8	grand canyon	paysage	New-oldGist	meaningfull	1 répétition	r	s	r	261	1079	261	gist108_2	1920 ms	R-gist	0	1	4			r	8	8	MF_N_oldGist_1920_1
3	0 immédiat	paysage23	cascade	paysage	New-oldGist	meaningfull	1 répétition	r	s	r	388	2487	388	gist123_2	1920 ms	R-gist	0	1	4			r	8	8	MF_N_oldGist_1920_1
3	0 immédiat	paysage28	farwest	paysage	New-oldGist	meaningfull	1 répétition	z	s	z	273	1088	273	gist128_2	1920 ms	R-gist	0	1	3			z	6	6	MF_N_oldGist_1920_1
3	0 immédiat	animal15	poisson	animal	New-oldGist	meaningfull	2 répétitions	r	s	r	333	396	333	gist015_2	1920 ms	R-gist	0	1	2			r	8	8	MF_N_oldGist_1920_2
3	0 immédiat	animal47	chevre	animal	New-oldGist	meaningfull	2 répétitions	r	s	r	421	642	421	gist047_2	1920 ms	R-gist	0	1	2			r	8	8	MF_N_oldGist_1920_2
3	0 immédiat	animal78	casoar	animal	New-oldGist	meaningfull	2 répétitions	r	s	r	557	1190	557	gist078_2	1920 ms	R-gist	0	1	2			r	8	8	MF_N_oldGist_1920_2
3	0 immédiat	fuit/legumes isoles22	mais	fruits/legumes	New-oldGist	meaningfull	2 répétitions	r	s	r	646	2361	646	gist422_3	1920 ms	R-gist	0	1	2			r	8	8	MF_N_oldGist_1920_2
3	0 immédiat	fuit/legumes isoles38	brocoli	fruits/legumes	New-oldGist	meaningfull	2 répétitions	r	s	r	333	1273	333	gist438_3	1920 ms	R-gist	0	1	2			r	8	8	MF_N_oldGist_1920_2
3	0 immédiat	fuit/legumes isoles57	pizza	fruits/legumes	New-oldGist	meaningfull	2 répétitions	r	s	r	402	1815	402	gist459_2	1920 ms	R-gist	0	1	4			r	8	8	MF_N_oldGist_1920_2
3	0 immédiat	objet isole1	balle	objet isole	New-oldGist	meaningfull	2 répétitions	r	l	r	565	454	565	gist151_2	1920 ms	R-gist	1		3	r	1			1	MF_N_oldGist_1920_2
3	0 immédiat	objet isole17	compa	objet isole	New-oldGist	meaningfull	2 répétitions	r	s	r	346	1438	346	gist166_2	1920 ms	R-gist	0	1	2			r	8	8	MF_N_oldGist_1920_2
3	0 immédiat	paysage15	fond marin	paysage	New-oldGist	meaningfull	2 répétitions	r	s	r	522	7907	522	gist115_2	1920 ms	R-gist	0	1	2			r	8	8	MF_N_oldGist_1920_2
3	0 immédiat	paysage25	route	paysage	New-oldGist	meaningfull	2 répétitions	r	s	r	1944	891	1944	gist125_7	1920 ms	R-gist	0	1	4			r	8	8	MF_N_oldGist_1920_2
3	0 immédiat	animal11	varan	animal	New	meaningfull	0 répétition	r	s	r	420	618	420	gist011_1		R-newgist	0	1	NA			r	8	8	MF_new
3	0 immédiat	animal12	punaise	animal	New	meaningfull	0 répétition	r	s	r	483	2420	483	gist012_1		R-newgist	0	1	NA			r	8	8	MF_new
3	0 immédiat	animal14	libellule	animal	New	meaningfull	0 répétition	r	s	r	348	804	348	gist014_1		R-newgist	0	1	NA			r	8	8	MF_new
3	0 immédiat	animal19	orque	animal	New	meaningfull	0 répétition	r	s	r	207	3664	207	gist019_1		R-newgist	0	1	NA			r	8	8	MF_new
3	0 immédiat	animal23	buffle	animal	New	meaningfull	0 répétition	r	l	r	884	1742	884	gist023_1		R-newgist	1		NA	r	1			1	MF_new
3	0 immédiat	animal24	hippopotame	animal	New	meaningfull	0 répétition	r	s	r	327	1261	327	gist024_1		R-newgist	0	1	NA			r	8	8	MF_new
3	0 immédiat	animal32	renard	animal	New	meaningfull	0 répétition	r	s	r	468	554	468	gist032_1		R-newgist	0	1	NA			r	8	8	MF_new
3	0 immédiat	animal34	lion	animal	New	meaningfull	0 répétition	r	s	r	462	2336	462	gist034_4		R-newgist	0	1	NA			r	8	8	MF_new
3	0 immédiat	animal36	chat	animal	New	meaningfull	0 répétition	r	s	r	1797	777	1797	gist036_2		R-newgist	0	1	NA			r	8	8	MF_new
3	0 immédiat	animal46	leopard	animal	New	meaningfull	0 répétition	r	s	r	378	2099	378	gist046_2		R-newgist	0	1	NA			r	8	8	MF_new
3	0 immédiat	animal120	blereau	animal	New	meaningfull	0 répétition	r	s	r	412	1033	412	gist050_2		R-newgist	0	1	NA			r	8	8	MF_new
3	0 immédiat	animal55	singe	animal	New	meaningfull	0 répétition	r	s	r	294	1744	294	gist055_1		R-newgist	0	1	NA			r	8	8	MF_new
3	0 immédiat	animal66	autruche	animal	New	meaningfull	0 répétition	r	s	r	218	669	218	gist066_1		R-newgist	0	1	NA			r	8	8	MF_new
3	0 immédiat	animal69	oiseau	animal	New	meaningfull	0 répétition	r	s	r	359	635	359	gist069_1		R-newgist	0	1	NA			r	8	8	MF_new
3	0 immédiat	animal71	oie	animal	New	meaningfull	0 répétition	r	s	r	302	1063	302	gist071_1		R-newgist	0	1	NA			r	8	8	MF_new
3	0 immédiat	animal72	oiseau2	animal	New	meaningfull	0 répétition	r	s	r	560	451	560	gist072_1		R-newgist	0	1	NA			r	8	8	MF_new
3	0 immédiat	fuit/legumes isoles11	kiwi	fruits/legumes	New	meaningfull	0 répétition	r	s	r	439	408	439	gist411_1		R-newgist	0	1	NA			r	8	8	MF_new
3	0 immédiat	fuit/legumes isoles13	citron vert	fruits/legumes	New	meaningfull	0 répétition	r	s	r	508	425	508	gist413_1		R-newgist	0	1	NA			r	8	8	MF_new
3	0 immédiat	fuit/legumes isoles15	amande	fruits/legumes	New	meaningfull	0 répétition	z	s	z	3108	917	3108	gist415_2		R-newgist	0	1	NA			z	6	6	MF_new
3	0 immédiat	fuit/legumes isoles16	litchi	fruits/legumes	New	meaningfull	0 répétition	r	s	r	2005	4303	2005	gist416_1		R-newgist	0	1	NA			r	8	8	MF_new
3	0 immédiat	fuit/legumes isoles17	melon	fruits/legumes	New	meaningfull	0 répétition	r	s	r	464	634	464	gist417_1		R-newgist	0	1	NA			r	8	8	MF_new
3	0 immédiat	fuit/legumes isoles20	courgette	fruits/legumes	New	meaningfull	0 répétition	r	s	r	762	3606	762	gist420_1		R-newgist	0	1	NA			r	8	8	MF_new
3	0 immédiat	fuit/legumes isoles21	framboise	fruits/legumes	New	meaningfull	0 répétition	r	s	r	675	803	675	gist421_1		R-newgist	0	1	NA			r	8	8	MF_new
3	0 immédiat	fuit/legumes isoles23	gateau	fruits/legumes	New	meaningfull	0 répétition	r	s	r	403	2263	403	gist423_2		R-newgist	0	1	NA			r	8	8	MF_new
3	0 immédiat	fuit/legumes isoles24	hotdog	fruits/legumes	New	meaningfull	0 répétition	r	s	r	187	2942	187	gist424_2		R-newgist	0	1	NA			r	8	8	MF_new
3	0 immédiat	fuit/legumes isoles35	patate	fruits/legumes	New	meaningfull	0 répétition	e	l	e	1684	851	1684	gist435_2		R-newgist	1		NA	e	2			2	MF_new
3	0 immédiat	fuit/legumes isoles44	noisette	fruits/legumes	New	meaningfull	0 répétition	r	s	r	262	423	262	gist444_2		R-newgist	0	1	NA			r	8	8	MF_new
3	0 immédiat	fuit/legumes isoles48	figue	fruits/legumes	New	meaningfull	0 répétition	r	s	r	419	806	419	gist448_3		R-newgist	0	1	NA			r	8	8	MF_new
3	0 immédiat	objet isole7	trombone	objet isole	New	meaningfull	0 répétition	e	l	e	645	2144	645	gist157_1		R-newgist	1		NA	e	2			2	MF_new
3	0 immédiat	objet isole9	fil	objet isole	New	meaningfull	0 répétition	r	s	r	196	2410	196	gist158_1		R-newgist	0	1	NA			r	8	8	MF_new
3	0 immédiat	objet isole15	crayon	objet isole	New	meaningfull	0 répétition	r	s	r	601	3424	601	gist164_1		R-newgist	0	1	NA			r	8	8	MF_new
3	0 immédiat	objet isole27	pioche	objet isole	New	meaningfull	0 répétition	r	s	r	495	666	495	gist176_1		R-newgist	0	1	NA			r	8	8	MF_new
3	0 immédiat	objet isole29	mèche	objet isole	New	meaningfull	0 répétition	r	s	r	381	298	381	gist178_1		R-newgist	0	1	NA			r	8	8	MF_new
3	0 immédiat	objet isole30	niveau	objet isole	New	meaningfull	0 répétition	r	s	r	293	1569	293	gist179_1		R-newgist	0	1	NA			r	8	8	MF_new
3	0 immédiat	paysage5	coucher de soleil	paysage	New	meaningfull	0 répétition	a	s	a	486	2957	486	gist105_1		R-newgist	0	1	NA			a	5	5	MF_new
3	0 immédiat	paysage7	foret	paysage	New	meaningfull	0 répétition	e	s	e	542	4372	542	gist107_2		R-newgist	0	1	NA			e	7	7	MF_new
3	0 immédiat	paysage10	montagne	paysage	New	meaningfull	0 répétition	e	s	e	3124	475	3124	gist110_1		R-newgist	0	1	NA			e	7	7	MF_new
3	0 immédiat	paysage18	neige	paysage	New	meaningfull	0 répétition	z	s	z	617	783	617	gist118_1		R-newgist	0	1	NA			z	6	6	MF_new
3	0 immédiat	paysage22	mer/montagne	paysage	New	meaningfull	0 répétition	r	s	r	322	1064	322	gist122_1		R-newgist	0	1	NA			r	8	8	MF_new
3	0 immédiat	paysage26	desert	paysage	New	meaningfull	0 répétition	r	s	r	1479	624	1479	gist126_1		R-newgist	0	1	NA			r	8	8	MF_new
3	0 immédiat	meaningless091	meanigless	meanigless	New	meaningless	0 répétition	r	s	r	310	4748	310	Image0007		New	0	1	4			r	8	8	ML_new
3	0 immédiat	meaningless109	meanigless	meanigless	New	meaningless	0 répétition	z	s	z	371	1243	371	Image0008		New	0	1	4			z	6	6	ML_new
3	0 immédiat	meaningless127	meanigless	meanigless	New	meaningless	0 répétition	e	l	e	1268	1119	1268	Image0011		New	1		4	e	2			2	ML_new
3	0 immédiat	meaningless159	meanigless	meanigless	New	meaningless	0 répétition	z	s	z	1505	940	1505	Image0016		New	0	1	4			z	6	6	ML_new
3	0 immédiat	meaningless145	meanigless	meanigless	New	meaningless	0 répétition	a	s	a	1065	2067	1065	Image0069		New	0	1	4			a	5	5	ML_new
3	0 immédiat	meaningless092	meanigless	meanigless	New	meaningless	0 répétition	z	l	z	571	460	571	Image0084		New	1		4	z	3			3	ML_new
3	0 immédiat	meaningless110	meanigless	meanigless	New	meaningless	0 répétition	z	s	z	2078	1778	2078	Image0085		New	0	1	4			z	6	6	ML_new
3	0 immédiat	meaningless141	meanigless	meanigless	New	meaningless	0 répétition	e	l	e	353	526	353	Image0086		New	1		4	e	2			2	ML_new
3	0 immédiat	meaningless160	meanigless	meanigless	New	meaningless	0 répétition	r	s	r	533	1080	533	Image0089		New	0	1	4			r	8	8	ML_new
3	0 immédiat	meaningless146	meanigless	meanigless	New	meaningless	0 répétition	r	s	r	343	1108	343	Image0103		New	0	1	3			r	8	8	ML_new
3	0 immédiat	meaningless093	meanigless	meanigless	New	meaningless	0 répétition	z	s	z	541	931	541	Image0119		New	0	1	4			z	6	6	ML_new
3	0 immédiat	meaningless111	meanigless	meanigless	New	meaningless	0 répétition	e	s	e	4140	750	4140	Image0122		New	0	1	4			e	7	7	ML_new
3	0 immédiat	meaningless128	meanigless	meanigless	New	meaningless	0 répétition	a	l	a	259	597	259	Image0123		New	1		4	a	4			4	ML_new
3	0 immédiat	meaningless147	meanigless	meanigless	New	meaningless	0 répétition	r	s	r	342	1534	342	Image0155		New	0	1	4			r	8	8	ML_new
3	0 immédiat	meaningless094	meanigless	meanigless	New	meaningless	0 répétition	r	s	r	460	566	460	Image0171		New	0	1	3			r	8	8	ML_new
3	0 immédiat	meaningless112	meanigless	meanigless	New	meaningless	0 répétition	z	l	z	1234	2301	1234	Image0172		New	1		4	z	3			3	ML_new
3	0 immédiat	meaningless129	meanigless	meanigless	New	meaningless	0 répétition	r	s	r	886	3906	886	Image0174		New	0	1	4			r	8	8	ML_new
3	0 immédiat	meaningless105	meanigless	meanigless	New	meaningless	0 répétition	r	s	r	358	483	358	Image0201		New	0	1	4			r	8	8	ML_new
3	0 immédiat	meaningless123	meanigless	meanigless	New	meaningless	0 répétition	z	s	z	704	903	704	Image0202		New	0	1	4			z	6	6	ML_new
3	0 immédiat	meaningless148	meanigless	meanigless	New	meaningless	0 répétition	r	s	r	341	551	341	Image0214		New	0	1	4			r	8	8	ML_new
3	0 immédiat	meaningless095	meanigless	meanigless	New	meaningless	0 répétition	r	s	r	1036	633	1036	Image0235		New	0	1	4			r	8	8	ML_new
3	0 immédiat	meaningless124	meanigless	meanigless	New	meaningless	0 répétition	e	s	e	431	664	431	Image0239		New	0	1	4			e	7	7	ML_new
3	0 immédiat	meaningless130	meanigless	meanigless	New	meaningless	0 répétition	e	s	e	372	915	372	Image0240		New	0	1	4			e	7	7	ML_new
3	0 immédiat	meaningless149	meanigless	meanigless	New	meaningless	0 répétition	r	s	r	362	497	362	Image0340		New	0	1	2			r	8	8	ML_new
3	0 immédiat	meaningless087	meanigless	meanigless	New	meaningless	0 répétition	r	s	r	200	403	200	Image0381		New	0	1	4			r	8	8	ML_new
3	0 immédiat	meaningless096	meanigless	meanigless	New	meaningless	0 répétition	r	s	r	307	903	307	Image0386		New	0	1	4			r	8	8	ML_new
3	0 immédiat	meaningless113	meanigless	meanigless	New	meaningless	0 répétition	e	s	e	738	2790	738	Image0402		New	0	1	4			e	7	7	ML_new
3	0 immédiat	meaningless131	meanigless	meanigless	New	meaningless	0 répétition	r	s	r	335	2111	335	Image0403		New	0	1	4			r	8	8	ML_new
3	0 immédiat	meaningless097	meanigless	meanigless	New	meaningless	0 répétition	r	s	r	2224	2479	2224	Image0456		New	0	1	4			r	8	8	ML_new
3	0 immédiat	meaningless114	meanigless	meanigless	New	meaningless	0 répétition	r	s	r	512	467	512	Image0457		New	0	1	4			r	8	8	ML_new
3	0 immédiat	meaningless132	meanigless	meanigless	New	meaningless	0 répétition	e	s	e	306	2199	306	Image0458		New	0	1	4			e	7	7	ML_new
3	0 immédiat	meaningless150	meanigless	meanigless	New	meaningless	0 répétition	r	l	r	568	1012	568	Image0476		New	1		4	r	1			1	ML_new
3	0 immédiat	meaningless098	meanigless	meanigless	New	meaningless	0 répétition	r	s	r	245	481	245	Image0486		New	0	1	4			r	8	8	ML_new
3	0 immédiat	meaningless115	meanigless	meanigless	New	meaningless	0 répétition	r	s	r	457	550	457	Image0487		New	0	1	4			r	8	8	ML_new
3	0 immédiat	meaningless133	meanigless	meanigless	New	meaningless	0 répétition	r	s	r	426	993	426	Image0488		New	0	1	4			r	8	8	ML_new
3	0 immédiat	meaningless151	meanigless	meanigless	New	meaningless	0 répétition	r	s	r	168	459	168	Image0609		New	0	1	4			r	8	8	ML_new
3	0 immédiat	meaningless099	meanigless	meanigless	New	meaningless	0 répétition	r	s	r	211	434	211	Image0617		New	0	1	4			r	8	8	ML_new
3	0 immédiat	meaningless116	meanigless	meanigless	New	meaningless	0 répétition	z	s	z	519	1147	519	Image0618		New	0	1	4			z	6	6	ML_new
3	0 immédiat	meaningless134	meanigless	meanigless	New	meaningless	0 répétition	r	s	r	351	1198	351	Image0619		New	0	1	4			r	8	8	ML_new
3	0 immédiat	meaningless088	meanigless	meanigless	New	meaningless	0 répétition	e	l	e	1864	5959	1864	Image0630		New	1		3	e	2			2	ML_new
3	0 immédiat	meaningless152	meanigless	meanigless	New	meaningless	0 répétition	r	s	r	443	372	443	Image0635		New	0	1	4			r	8	8	ML_new
3	0 immédiat	meaningless081	meanigless	meanigless	New	meaningless	0 répétition	z	s	z	1045	2293	1045	Image0643		New	0	1	4			z	6	6	ML_new
3	0 immédiat	meaningless100	meanigless	meanigless	New	meaningless	0 répétition	r	s	r	384	757	384	Image0644		New	0	1	4			r	8	8	ML_new
3	0 immédiat	meaningless117	meanigless	meanigless	New	meaningless	0 répétition	a	l	a	1181	2348	1181	Image0645		New	1		4	a	4			4	ML_new
3	0 immédiat	meaningless135	meanigless	meanigless	New	meaningless	0 répétition	r	s	r	489	719	489	Image0646		New	0	1	2			r	8	8	ML_new
3	0 immédiat	meaningless153	meanigless	meanigless	New	meaningless	0 répétition	r	s	r	424	839	424	Image0664		New	0	1	4			r	8	8	ML_new
3	0 immédiat	meaningless082	meanigless	meanigless	New	meaningless	0 répétition	r	s	r	325	594	325	Image0671		New	0	1	4			r	8	8	ML_new
3	0 immédiat	meaningless101	meanigless	meanigless	New	meaningless	0 répétition	r	s	r	315	1501	315	Image0672		New	0	1	4			r	8	8	ML_new
3	0 immédiat	meaningless118	meanigless	meanigless	New	meaningless	0 répétition	e	s	e	318	2074	318	Image0673		New	0	1	4			e	7	7	ML_new
3	0 immédiat	meaningless136	meanigless	meanigless	New	meaningless	0 répétition	r	s	r	1208	45	1208	Image0674		New	0	1	4			r	8	8	ML_new
3	0 immédiat	meaningless154	meanigless	meanigless	New	meaningless	0 répétition	r	s	r	493	875	493	Image0691		New	0	1	4			r	8	8	ML_new
3	0 immédiat	meaningless083	meanigless	meanigless	New	meaningless	0 répétition	r	s	r	636	2446	636	Image0698		New	0	1	3			r	8	8	ML_new
3	0 immédiat	meaningless102	meanigless	meanigless	New	meaningless	0 répétition	e	s	e	540	2940	540	Image0701		New	0	1	4			e	7	7	ML_new
3	0 immédiat	meaningless119	meanigless	meanigless	New	meaningless	0 répétition	e	s	e	1016	1825	1016	Image0702		New	0	1	4			e	7	7	ML_new
3	0 immédiat	meaningless137	meanigless	meanigless	New	meaningless	0 répétition	e	s	e	22	368	22	Image0704		New	0	1	4			e	7	7	ML_new
3	0 immédiat	meaningless155	meanigless	meanigless	New	meaningless	0 répétition	r	s	r	203	658	203	Image0896		New	0	1	4			r	8	8	ML_new
3	0 immédiat	meaningless084	meanigless	meanigless	New	meaningless	0 répétition	r	s	r	262	491	262	Image0932		New	0	1	4			r	8	8	ML_new
3	0 immédiat	meaningless103	meanigless	meanigless	New	meaningless	0 répétition	e	s	e	423	836	423	Image0933		New	0	1	4			e	7	7	ML_new
3	0 immédiat	meaningless120	meanigless	meanigless	New	meaningless	0 répétition	r	s	r	542	969	542	Image1001		New	0	1	4			r	8	8	ML_new
3	0 immédiat	meaningless138	meanigless	meanigless	New	meaningless	0 répétition	None	l	None	10000		10000	Image1101		New	1		4	None	Non2			Non2	ML_new
3	0 immédiat	meaningless156	meanigless	meanigless	New	meaningless	0 répétition	r	s	r	358	2183	358	Image1207		New	0	1	4			r	8	8	ML_new
3	0 immédiat	meaningless085	meanigless	meanigless	New	meaningless	0 répétition	r	s	r	513	6479	513	Image1215		New	0	1	4			r	8	8	ML_new
3	0 immédiat	meaningless106	meanigless	meanigless	New	meaningless	0 répétition	r	s	r	816	5639	816	Image1216		New	0	1	4			r	8	8	ML_new
3	0 immédiat	meaningless121	meanigless	meanigless	New	meaningless	0 répétition	e	s	e	802	680	802	Image1217		New	0	1	4			e	7	7	ML_new
3	0 immédiat	meaningless139	meanigless	meanigless	New	meaningless	0 répétition	r	s	r	371	797	371	Image1218		New	0	1	4			r	8	8	ML_new
3	0 immédiat	meaningless142	meanigless	meanigless	New	meaningless	0 répétition	r	s	r	418	240	418	Image1232		New	0	1	4			r	8	8	ML_new
3	0 immédiat	meaningless157	meanigless	meanigless	New	meaningless	0 répétition	a	l	a	7666	3127	7666	Image1234		New	1		4	a	4			4	ML_new
3	0 immédiat	meaningless086	meanigless	meanigless	New	meaningless	0 répétition	r	s	r	438	594	438	Image1245		New	0	1	4			r	8	8	ML_new
3	0 immédiat	meaningless104	meanigless	meanigless	New	meaningless	0 répétition	r	s	r	385	684	385	Image1246		New	0	1	4			r	8	8	ML_new
3	0 immédiat	meaningless122	meanigless	meanigless	New	meaningless	0 répétition	e	l	e	662	974	662	Image1247		New	1		4	e	2			2	ML_new
3	0 immédiat	meaningless140	meanigless	meanigless	New	meaningless	0 répétition	r	s	r	700	1102	700	Image1250		New	0	1	4			r	8	8	ML_new
3	0 immédiat	meaningless158	meanigless	meanigless	New	meaningless	0 répétition	e	s	e	3954	3565	3954	Image1273		New	0	1	4			e	7	7	ML_new
3	0 immédiat	meaningless089	meanigless	meanigless	New	meaningless	0 répétition	r	s	r	447	797	447	R17		New	0	1	4			r	8	8	ML_new
3	0 immédiat	meaningless107	meanigless	meanigless	New	meaningless	0 répétition	r	s	r	0	1344	0	R18		New	0	1	4			r	8	8	ML_new
3	0 immédiat	meaningless125	meanigless	meanigless	New	meaningless	0 répétition	r	s	r	486	1146	486	R19		New	0	1	4			r	8	8	ML_new
3	0 immédiat	meaningless143	meanigless	meanigless	New	meaningless	0 répétition	r	s	r	550	1280	550	R20		New	0	1	4			r	8	8	ML_new
3	0 immédiat	meaningless090	meanigless	meanigless	New	meaningless	0 répétition	r	s	r	659	4000	659	R5		New	0	1	4			r	8	8	ML_new
3	0 immédiat	meaningless108	meanigless	meanigless	New	meaningless	0 répétition	r	s	r	448	941	448	R6		New	0	1	4			r	8	8	ML_new
3	0 immédiat	meaningless126	meanigless	meanigless	New	meaningless	0 répétition	e	l	e	750	1029	750	R7		New	1		4	e	2			2	ML_new
3	0 immédiat	meaningless144	meanigless	meanigless	New	meaningless	0 répétition	e	s	e	2061	629	2061	R8		New	0	1	4			e	7	7	ML_new
3	0 immédiat	meaningless177	meanigless	meanigless	Old	meaningless	1 répétition	r	s	r	1100	780	1100	Image0070	120 ms	Old	0	1	4			r	8	8	ML_old_120_1
3	0 immédiat	meaningless209	meanigless	meanigless	Old	meaningless	1 répétition	r	s	r	1	1241	1	Image0071	120 ms	Old	0	1	4			r	8	8	ML_old_120_1
3	0 immédiat	meaningless161	meanigless	meanigless	Old	meaningless	1 répétition	z	s	z	751	2773	751	Image0128	120 ms	Old	0	1	4			z	6	6	ML_old_120_1
3	0 immédiat	meaningless225	meanigless	meanigless	Old	meaningless	1 répétition	r	s	r	424	685	424	Image0132	120 ms	Old	0	1	4			r	8	8	ML_old_120_1
3	0 immédiat	meaningless193	meanigless	meanigless	Old	meaningless	1 répétition	a	l	a	332	685	332	Image0178	120 ms	Old	1		4	a	4			4	ML_old_120_1
3	0 immédiat	meaningless181	meanigless	meanigless	Old	meaningless	1 répétition	r	s	r	1421	2167	1421	Image0344	120 ms	Old	0	1	4			r	8	8	ML_old_120_1
3	0 immédiat	meaningless213	meanigless	meanigless	Old	meaningless	1 répétition	r	s	r	386	411	386	Image0348	120 ms	Old	0	1	4			r	8	8	ML_old_120_1
3	0 immédiat	meaningless173	meanigless	meanigless	Old	meaningless	1 répétition	e	l	e	479	623	479	Image0425	120 ms	Old	1		2	e	2			2	ML_old_120_1
3	0 immédiat	meaningless237	meanigless	meanigless	Old	meaningless	1 répétition	r	s	r	90	482	90	Image0427	120 ms	Old	0	1	4			r	8	8	ML_old_120_1
3	0 immédiat	meaningless165	meanigless	meanigless	Old	meaningless	1 répétition	e	s	e	1399	601	1399	Image0461	120 ms	Old	0	1	4			e	7	7	ML_old_120_1
3	0 immédiat	meaningless229	meanigless	meanigless	Old	meaningless	1 répétition	r	s	r	269	858	269	Image0465	120 ms	Old	0	1	4			r	8	8	ML_old_120_1
3	0 immédiat	meaningless206	meanigless	meanigless	Old	meaningless	1 répétition	r	s	r	551	795	551	Image0477	120 ms	Old	0	1	4			r	8	8	ML_old_120_1
3	0 immédiat	meaningless197	meanigless	meanigless	Old	meaningless	1 répétition	a	l	a	2546	1817	2546	Image0501	120 ms	Old	1		3	a	4			4	ML_old_120_1
3	0 immédiat	meaningless185	meanigless	meanigless	Old	meaningless	1 répétition	r	s	r	354	1445	354	Image0665	120 ms	Old	0	1	4			r	8	8	ML_old_120_1
3	0 immédiat	meaningless217	meanigless	meanigless	Old	meaningless	1 répétition	r	s	r	444	564	444	Image0666	120 ms	Old	0	1	4			r	8	8	ML_old_120_1
3	0 immédiat	meaningless169	meanigless	meanigless	Old	meaningless	1 répétition	e	l	e	35	2742	35	Image0676	120 ms	Old	1		4	e	2			2	ML_old_120_1
3	0 immédiat	meaningless233	meanigless	meanigless	Old	meaningless	1 répétition	r	s	r	870	694	870	Image0785	120 ms	Old	0	1	4			r	8	8	ML_old_120_1
3	0 immédiat	meaningless202	meanigless	meanigless	Old	meaningless	1 répétition	r	s	r	647	1130	647	Image1104	120 ms	Old	0	1	2			r	8	8	ML_old_120_1
3	0 immédiat	meaningless189	meanigless	meanigless	Old	meaningless	1 répétition	e	l	e	635	1055	635	Image1235	120 ms	Old	1		4	e	2			2	ML_old_120_1
3	0 immédiat	meaningless221	meanigless	meanigless	Old	meaningless	1 répétition	r	s	r	495	1042	495	Image1236	120 ms	Old	0	1	4			r	8	8	ML_old_120_1
3	0 immédiat	meaningless191	meanigless	meanigless	Old	meaningless	2 répétitions	r	l	r	506	14111	506	Image0017	120 ms	Old	1		4	r	1			1	ML_old_120_2
3	0 immédiat	meaningless223	meanigless	meanigless	Old	meaningless	2 répétitions	r	s	r	490	738	490	Image0018	120 ms	Old	0	1	4			r	8	8	ML_old_120_2
3	0 immédiat	meaningless179	meanigless	meanigless	Old	meaningless	2 répétitions	r	s	r	248	395	248	Image0157	120 ms	Old	0	1	4			r	8	8	ML_old_120_2
3	0 immédiat	meaningless211	meanigless	meanigless	Old	meaningless	2 répétitions	r	s	r	309	447	309	Image0162	120 ms	Old	0	1	4			r	8	8	ML_old_120_2
3	0 immédiat	meaningless163	meanigless	meanigless	Old	meaningless	2 répétitions	e	s	e	1949	1652	1949	Image0242	120 ms	Old	0	1	4			e	7	7	ML_old_120_2
3	0 immédiat	meaningless227	meanigless	meanigless	Old	meaningless	2 répétitions	r	s	r	348	521	348	Image0246	120 ms	Old	0	1	4			r	8	8	ML_old_120_2
3	0 immédiat	meaningless195	meanigless	meanigless	Old	meaningless	2 répétitions	e	s	e	302	2673	302	Image0412	120 ms	Old	0	1	4			e	7	7	ML_old_120_2
3	0 immédiat	meaningless183	meanigless	meanigless	Old	meaningless	2 répétitions	r	s	r	315	1937	315	Image0610	120 ms	Old	0	1	4			r	8	8	ML_old_120_2
3	0 immédiat	meaningless215	meanigless	meanigless	Old	meaningless	2 répétitions	r	s	r	201	718	201	Image0611	120 ms	Old	0	1	4			r	8	8	ML_old_120_2
3	0 immédiat	meaningless167	meanigless	meanigless	Old	meaningless	2 répétitions	r	s	r	1015	437	1015	Image0621	120 ms	Old	0	1	4			r	8	8	ML_old_120_2
3	0 immédiat	meaningless231	meanigless	meanigless	Old	meaningless	2 répétitions	r	s	r	410	923	410	Image0623	120 ms	Old	0	1	4			r	8	8	ML_old_120_2
3	0 immédiat	meaningless199	meanigless	meanigless	Old	meaningless	2 répétitions	r	s	r	738	2490	738	Image0651	120 ms	Old	0	1	4			r	8	8	ML_old_120_2
3	0 immédiat	meaningless187	meanigless	meanigless	Old	meaningless	2 répétitions	r	s	r	213	712	213	Image0897	120 ms	Old	0	1	4			r	8	8	ML_old_120_2
3	0 immédiat	meaningless219	meanigless	meanigless	Old	meaningless	2 répétitions	r	s	r	199	2074	199	Image0916	120 ms	Old	0	1	4			r	8	8	ML_old_120_2
3	0 immédiat	meaningless171	meanigless	meanigless	Old	meaningless	2 répétitions	r	s	r	410	555	410	Image1103	120 ms	Old	0	1	4			r	8	8	ML_old_120_2
3	0 immédiat	meaningless235	meanigless	meanigless	Old	meaningless	2 répétitions	z	s	z	1751	1454	1751	Image1222	120 ms	Old	0	1	4			z	6	6	ML_old_120_2
3	0 immédiat	meaningless204	meanigless	meanigless	Old	meaningless	2 répétitions	e	l	e	37	1381	37	Image1253	120 ms	Old	1		4	e	2			2	ML_old_120_2
3	0 immédiat	meaningless175	meanigless	meanigless	Old	meaningless	2 répétitions	r	s	r	330	1908	330	R10	120 ms	Old	0	1	4			r	8	8	ML_old_120_2
3	0 immédiat	meaningless239	meanigless	meanigless	Old	meaningless	2 répétitions	r	l	r	361	578	361	R12	120 ms	Old	1		4	r	1			1	ML_old_120_2
3	0 immédiat	meaningless208	meanigless	meanigless	Old	meaningless	2 répétitions	r	s	r	921	1444	921	R23	120 ms	Old	0	1	4			r	8	8	ML_old_120_2
3	0 immédiat	meaningless178	meanigless	meanigless	Old	meaningless	1 répétition	e	l	e	651	238	651	Image0107	1920 ms	Old	1		4	e	2			2	ML_old_1920_1
3	0 immédiat	meaningless210	meanigless	meanigless	Old	meaningless	1 répétition	r	s	r	328	613	328	Image0108	1920 ms	Old	0	1	4			r	8	8	ML_old_1920_1
3	0 immédiat	meaningless205	meanigless	meanigless	Old	meaningless	1 répétition	r	s	r	3627	664	3627	Image0129	1920 ms	Old	0	1	4			r	8	8	ML_old_1920_1
3	0 immédiat	meaningless162	meanigless	meanigless	Old	meaningless	1 répétition	r	s	r	246	862	246	Image0176	1920 ms	Old	0	1	4			r	8	8	ML_old_1920_1
3	0 immédiat	meaningless226	meanigless	meanigless	Old	meaningless	1 répétition	r	s	r	410	614	410	Image0179	1920 ms	Old	0	1	4			r	8	8	ML_old_1920_1
3	0 immédiat	meaningless194	meanigless	meanigless	Old	meaningless	1 répétition	z	l	z	1203	491	1203	Image0243	1920 ms	Old	1		4	z	3			3	ML_old_1920_1
3	0 immédiat	meaningless182	meanigless	meanigless	Old	meaningless	1 répétition	e	l	e	1293	804	1293	Image0426	1920 ms	Old	1		4	e	2			2	ML_old_1920_1
3	0 immédiat	meaningless214	meanigless	meanigless	Old	meaningless	1 répétition	r	s	r	371	851	371	Image0478	1920 ms	Old	0	1	4			r	8	8	ML_old_1920_1
3	0 immédiat	meaningless166	meanigless	meanigless	Old	meaningless	1 répétition	r	s	r	349	828	349	Image0494	1920 ms	Old	0	1	4			r	8	8	ML_old_1920_1
3	0 immédiat	meaningless230	meanigless	meanigless	Old	meaningless	1 répétition	a	l	a	866	3528	866	Image0542	1920 ms	Old	1		4	a	4			4	ML_old_1920_1
3	0 immédiat	meaningless198	meanigless	meanigless	Old	meaningless	1 répétition	r	s	r	367	1381	367	Image0622	1920 ms	Old	0	1	4			r	8	8	ML_old_1920_1
3	0 immédiat	meaningless238	meanigless	meanigless	Old	meaningless	1 répétition	r	l	r	590	487	590	Image0680	1920 ms	Old	1		4	r	1			1	ML_old_1920_1
[truncated: 10,588 more rows]
